# Supplementary material for: Proteomics Complementation of the Rat Uterotrophic Assay for Estrogenic Endocrine Disruptors: A Roadmap of Advancing High Resolution Mass Spectrometry-Based Shotgun Survey to Targeted Biomarker Quantifications
Source: MDPI journal article supplement (doi:10.3390/ijms22041686), 2021-02-08
Supplement: s1 [file s1]

**Table S3.** List of optimized MRM transitions used for relative quantitation analysis of TGM2, EEF2, SELENBP1 and LUM with isotope-labeled internal standards.

| Peptide Sequence | NAT<br>Precursor<br><i>m/z</i> | NAT<br>Fragment<br><i>m/z</i> | SIS<br>Precursor<br><i>m/z</i> | SIS<br>Fragment<br><i>m/z</i> | Collison<br>Energy | Fragment Ion             | Retention Time<br>Segment (in<br>min) | Dwell Time<br>(in ms) | Protein ID |
|------------------|--------------------------------|-------------------------------|--------------------------------|-------------------------------|--------------------|--------------------------|---------------------------------------|-----------------------|------------|
| YSGC®LTESNLIK    | 692.8                          | 804.5                         | 696.9                          | 812.7                         | 24                 | <b>y7</b>                | 0-12                                  | 17                    | TGM2       |
| YSGC®LTESNLIK    | 692.8                          | 917.6                         | 696.9                          | 925.8                         | 24                 | y8                       | 0-12                                  | 17                    | TGM2       |
| SEGTYC®C®GPVSVR  | 736.3                          | 934.7                         | 741.4                          | 944.6                         | 33                 | y8                       | 0-12                                  | 17                    | TGM2       |
| SEGTYC®C®GPVSVR  | 736.3                          | 614.5                         | 741.4                          | 624.3                         | 24                 | <b>y6</b>                | 0-12                                  | 17                    | TGM2       |
| EGIPALDNFLDKL    | 722.8                          | 573.5                         | 726.4                          | 576.8                         | 23                 | <b>y10<sup>++</sup></b>  | 15-45                                 | 25                    | EEF2       |
| EGIPALDNFLDKL    | 722.8                          | 186.8                         | 726.4                          | 186.8                         | 29                 | b2                       | 15-45                                 | 25                    | EEF2       |
| TFC®QLILDPIFK    | 747.8                          | 504.2                         | 752                            | 512.3                         | 29                 | <b>y4</b>                | 15-45                                 | 25                    | EEF2       |
| TFC®QLILDPIFK    | 747.8                          | 845.9                         | 752                            | 853.6                         | 25                 | y7                       | 15-45                                 | 25                    | EEF2       |
| LILPSIISR        | 549.9                          | 759.5                         | 554.9                          | 769.5                         | 24                 | y7                       | 12-15                                 | 25                    | SELENBP1   |
| LILPSIISR        | 549.9                          | 227.0                         | 554.9                          | 227.0                         | 20                 | <b>b2</b>                | 12-15                                 | 25                    | SELENBP1   |
| HEIIQTLQMK       | 620.9                          | 266.9                         | 624.9                          | 266.9                         | 28                 | <b>b2</b>                | 0-12                                  | 17                    | SELENBP1   |
| HEIIQTLQMK       | 620.9                          | 362.0                         | 624.9                          | 362.0                         | 33                 | b3-H <sub>2</sub> O      | 0-12                                  | 17                    | SELENBP1   |
| NNQIDHIDEK       | 613.3                          | 257.9                         | 617.3                          | 265.9                         | 24                 | <b>y2-H<sub>2</sub>O</b> | 0-12                                  | 17                    | LUM        |
| NNQIDHIDEK       | 613.3                          | 275.9                         | 617.3                          | 283.9                         | 27                 | y2                       | 0-12                                  | 17                    | LUM        |
| SLEYLDLSFNQMSK   | 838.1                          | 841.4                         | 842.1                          | 849.5                         | 25                 | <b>y7</b>                | 12-15                                 | 25                    | LUM        |
| SLEYLDLSFNQMSK   | 838.1                          | 1069.6                        | 842.1                          | 1077.8                        | 23                 | y9                       | 12-15                                 | 25                    | LUM        |

NAT is endogenous proteotypic tryptic peptide.

SIS is stable isotope labeled peptide labeled on C-terminal amino acid, giving mass shift of +8 Da (from <sup>13</sup>C<sub>6</sub><sup>15</sup>N<sub>2</sub>-lysine), +10 Da (from <sup>13</sup>C<sub>6</sub><sup>15</sup>N<sub>4</sub>-arginine), and +7 Da (from <sup>13</sup>C<sub>6</sub><sup>15</sup>N-leucine) compared to non-labeled counterpart (NAT).

C® is carbamidomethylated cysteine.

**Bolded** fragment ion indicates quantifier ion, and the other fragment ion for each peptide is qualifier ion.
