# Supplementary material for: Proteomics Complementation of the Rat Uterotrophic Assay for Estrogenic Endocrine Disruptors: A Roadmap of Advancing High Resolution Mass Spectrometry-Based Shotgun Survey to Targeted Biomarker Quantifications
Source: MDPI journal article supplement (doi:10.3390/ijms22041686), 2021-02-08
Supplement: s1 [file s1]

(a)

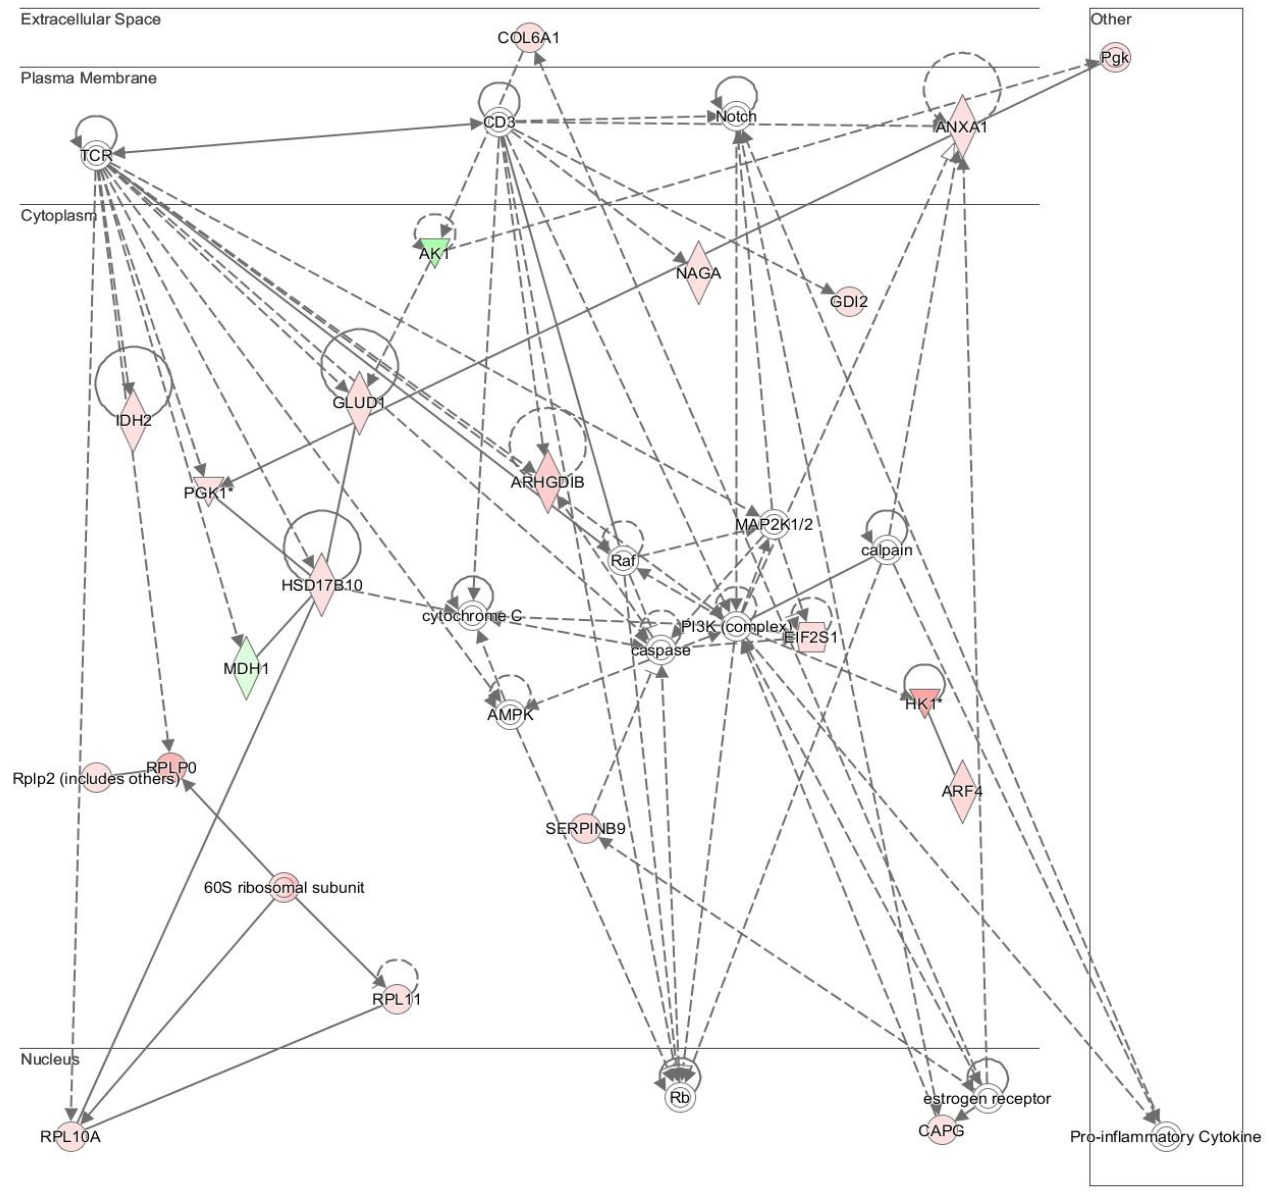

(b)

| Canonical pathway           | Target molecules                                                                                      | Z-score | P-value  |
|-----------------------------|-------------------------------------------------------------------------------------------------------|---------|----------|
| Estrogen receptor signaling | AMPK, CYTOCHROME c, estrogen receptor, MAP2K1/2, notch, PI3 (complex), Pro-inflammatory cytokine, Raf | 0.45    | 2.35E-03 |
| Sirtuin signaling pathway   | AMPK, cytochrome C, GLUD1, IDH2, PGK. PGK1, Pro-inflammatory cytokine                                 | N/A     | 4.7E-03  |

**Figure S1.** IPA® network linked to cancer, gastrointestinal disease and protein synthesis (a). The network was assembled from E<sub>2</sub>-regulated proteins in the uterus of OVX rats through identification by label-free shotgun proteomics. Red symbols: upregulated, green symbols: downregulated by the hormone; solid line: direct relationship, dashed line: indirect relationship. For further details on symbols and relationships, see [http://qiagen.force.com/KnowledgeBase/articles/Basic\\_Technical\\_Q\\_A/Legend](http://qiagen.force.com/KnowledgeBase/articles/Basic_Technical_Q_A/Legend). (b) Top canonical pathways and their corresponding molecular targets associated with the network shown. Z-scores indicate activation or suppression of the corresponding pathway (positive or negative values, respectively; N/A: no prediction can be made).

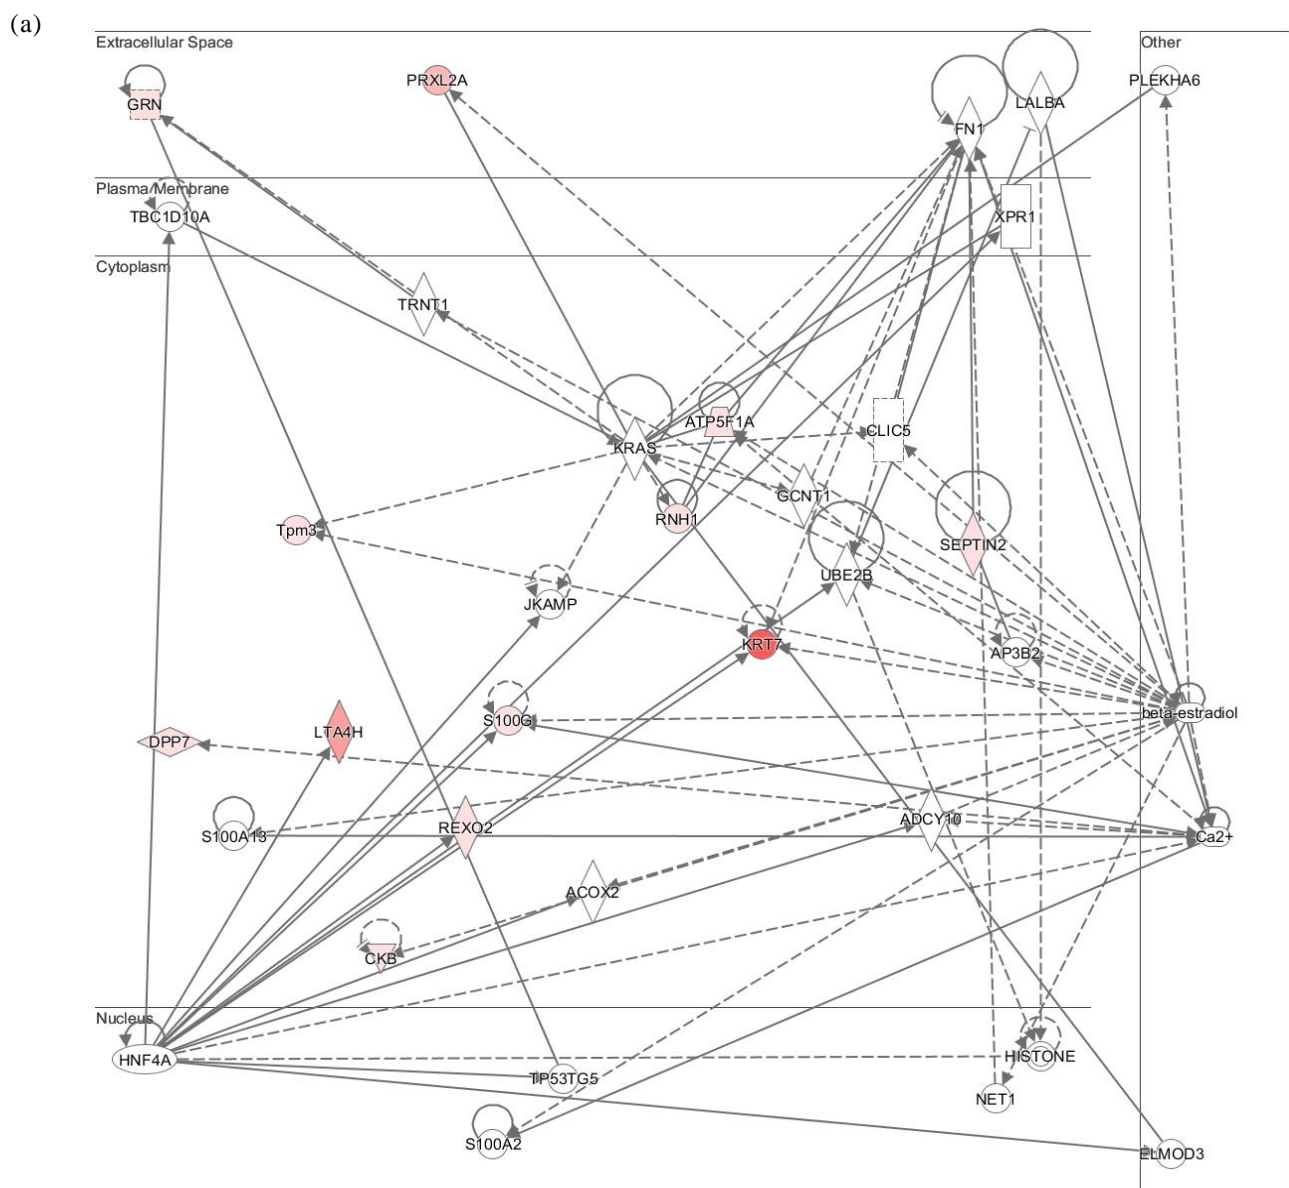

(b)

| Canonical pathway                 | Target molecules                         | Z-score | P-value  |
|-----------------------------------|------------------------------------------|---------|----------|
| Estrogen receptor signaling       | ADCY10, ATP5F1A, Ca <sup>2+</sup> , KRAS | 0.45    | 2.35E-03 |
| Glucocorticoid receptor signaling | ATP5F1A, Ca <sup>2+</sup> , KRAS, KRT7   | N/A     | 1.04E-06 |

**Figure S2.** IPA® network linked to cancer, cell to cell signaling and interaction, organismal injury and abnormalities (a). The network was assembled from E<sub>2</sub>-regulated proteins in the uterus of OVX rats through identification by label-free shotgun proteomics. Red symbols: upregulated, green symbols: downregulated by the hormone; solid line: direct relationship, dashed line: indirect relationship. For further details on symbols and relationships, see [http://qiagen.force.com/KnowledgeBase/articles/Basic\\_Technical\\_Q\\_A/Legend](http://qiagen.force.com/KnowledgeBase/articles/Basic_Technical_Q_A/Legend). (b) Top canonical pathways and their corresponding molecular targets associated with the network shown. Z-scores indicate activation or suppression of the corresponding pathway (positive or negative values, respectively; N/A: no prediction can be made).

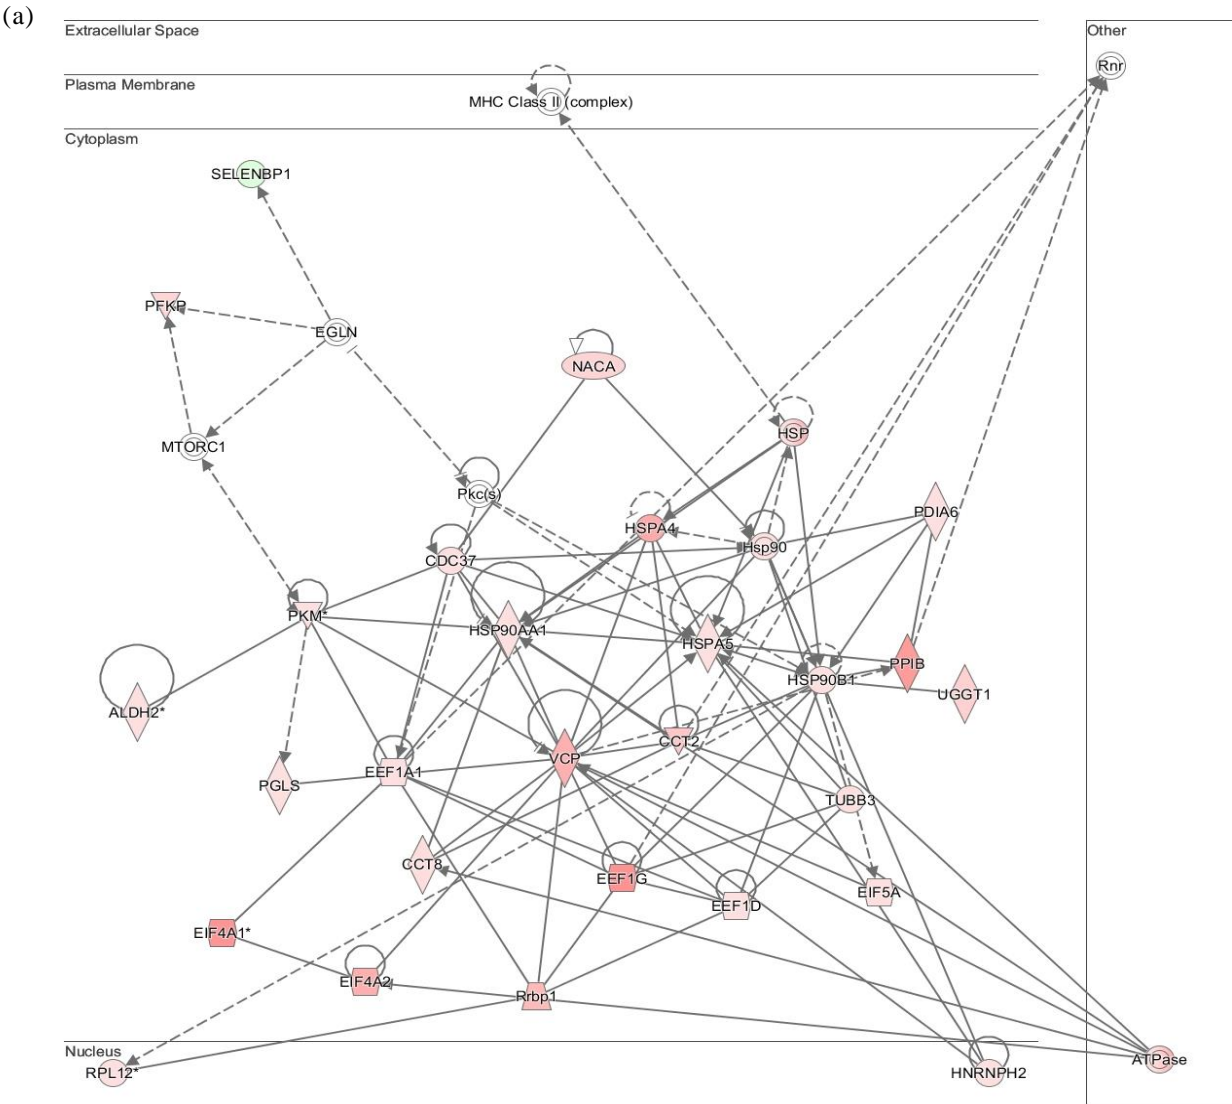

(b)

| Canonical pathway              | Target molecules                                             | Z-score | P-value  |
|--------------------------------|--------------------------------------------------------------|---------|----------|
| Protein ubiquitination pathway | ATPase, HSP90, HSP,HSP90AA1,HSP90B1,HSPA4,HSPA5, MHC ClassII | N/A     | 5.79E-07 |
| Estrogen receptor signaling    | ATPase, HSP90, HSP,HSP90AA1,HSP90B1,MTORC1, Pkc(s)           | 0.45    | 2.35E-03 |

**Figure S3.** IPA® network linked to post-translational modification, protein folding and protein synthesis (a). The network was assembled from E<sub>2</sub>-regulated proteins in the uterus of OVX Brown Norway rats through identification by label-free shotgun proteomics. Red symbols: upregulated, green symbols: downregulated by the hormone; solid line: direct relationship, dashed line: indirect relationship. See [http://qiagen.force.com/KnowledgeBase/articles/Basic\\_Technical\\_Q\\_A/Legend](http://qiagen.force.com/KnowledgeBase/articles/Basic_Technical_Q_A/Legend) for further details on symbols and relationships. (b) Top canonical pathways and their corresponding molecular targets associated with the network shown. Z-scores indicate activation or suppression of the corresponding pathway (positive or negative values, respectively; N/A: no prediction can be made).

(a)

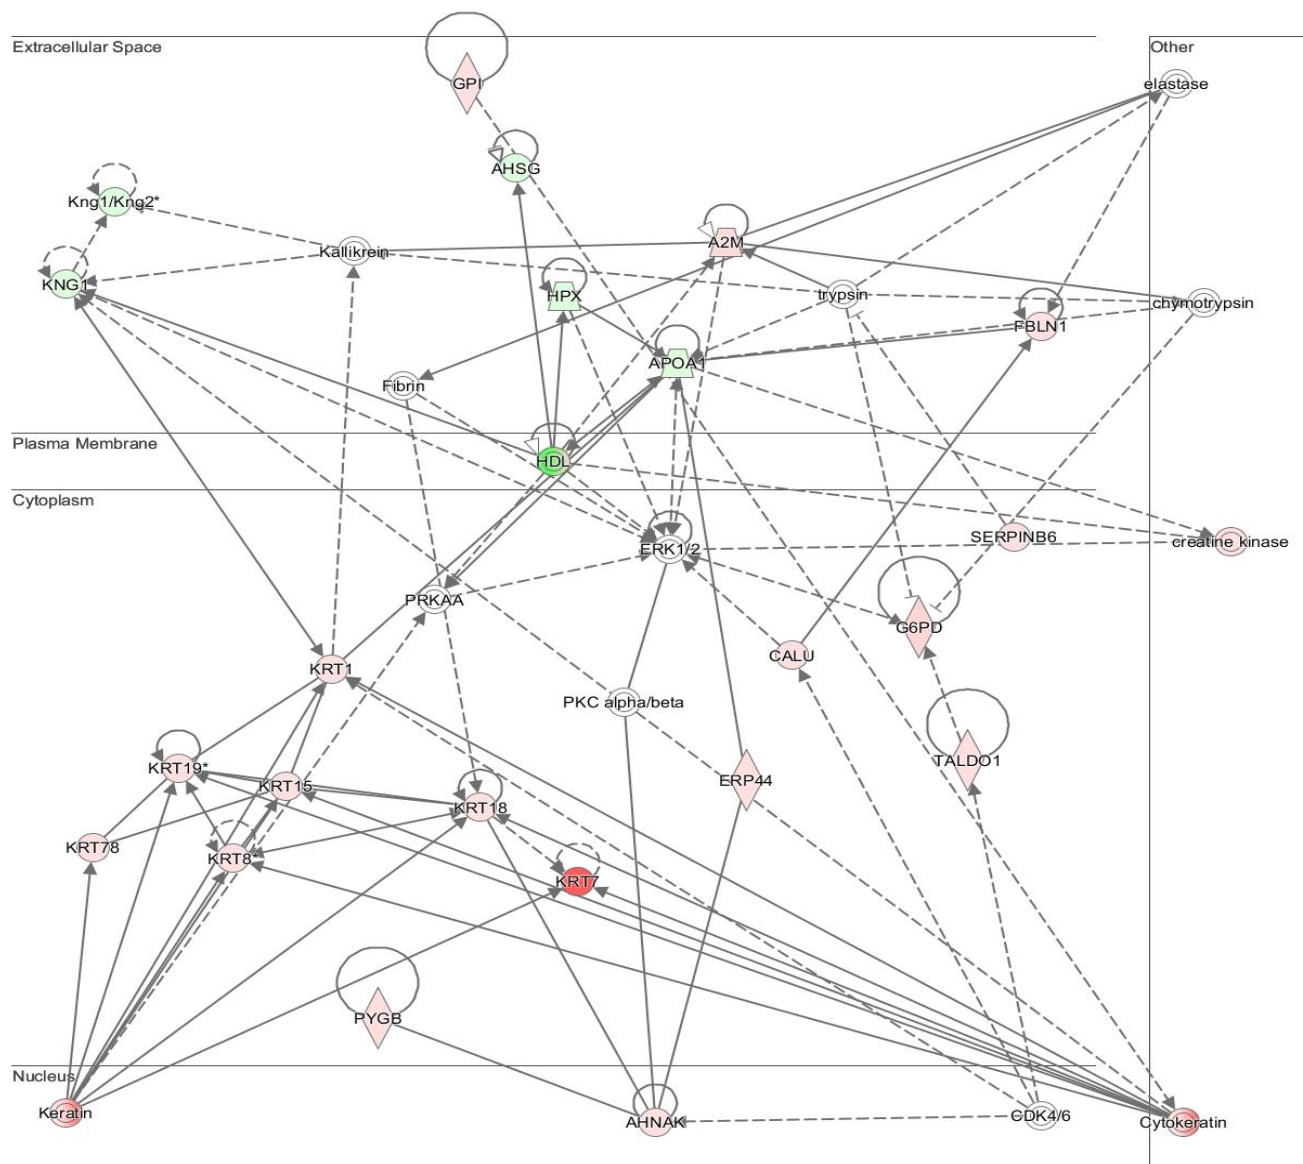

(b)

| Canonical pathway           | Target molecules                                             | Z-score | P-value  |
|-----------------------------|--------------------------------------------------------------|---------|----------|
| PPARα/RXRα activation       | APOA1, creatinine kinase, erk1/2, HDL, PKC alpha/beta, PRKAA | -2      | 4.67E-02 |
| Estrogen receptor signaling | Elastase, ERK1/2, HDL, PKC alpha/beta, PRKAA                 | 0.45    | 2.35E-03 |

**Figure S4.** IPA® network linked to cell morphology and embryonic development (a). The network was assembled from E<sub>2</sub>-regulated proteins in the uterus of OVX rats through identification by label-free shotgun proteomics. Red symbols: upregulated, green symbols: downregulated by the hormone; solid line: direct relationship, dashed line: indirect relationship. For further details on symbols and relationships, see [http://qiagen.force.com/KnowledgeBase/articles/Basic\\_Technical\\_Q\\_A/Legend](http://qiagen.force.com/KnowledgeBase/articles/Basic_Technical_Q_A/Legend). (b) Top canonical pathways and their corresponding molecular targets associated with the network shown. Z-scores indicate activation or suppression of the corresponding pathway (positive or negative values, respectively; N/A: no prediction can be made).



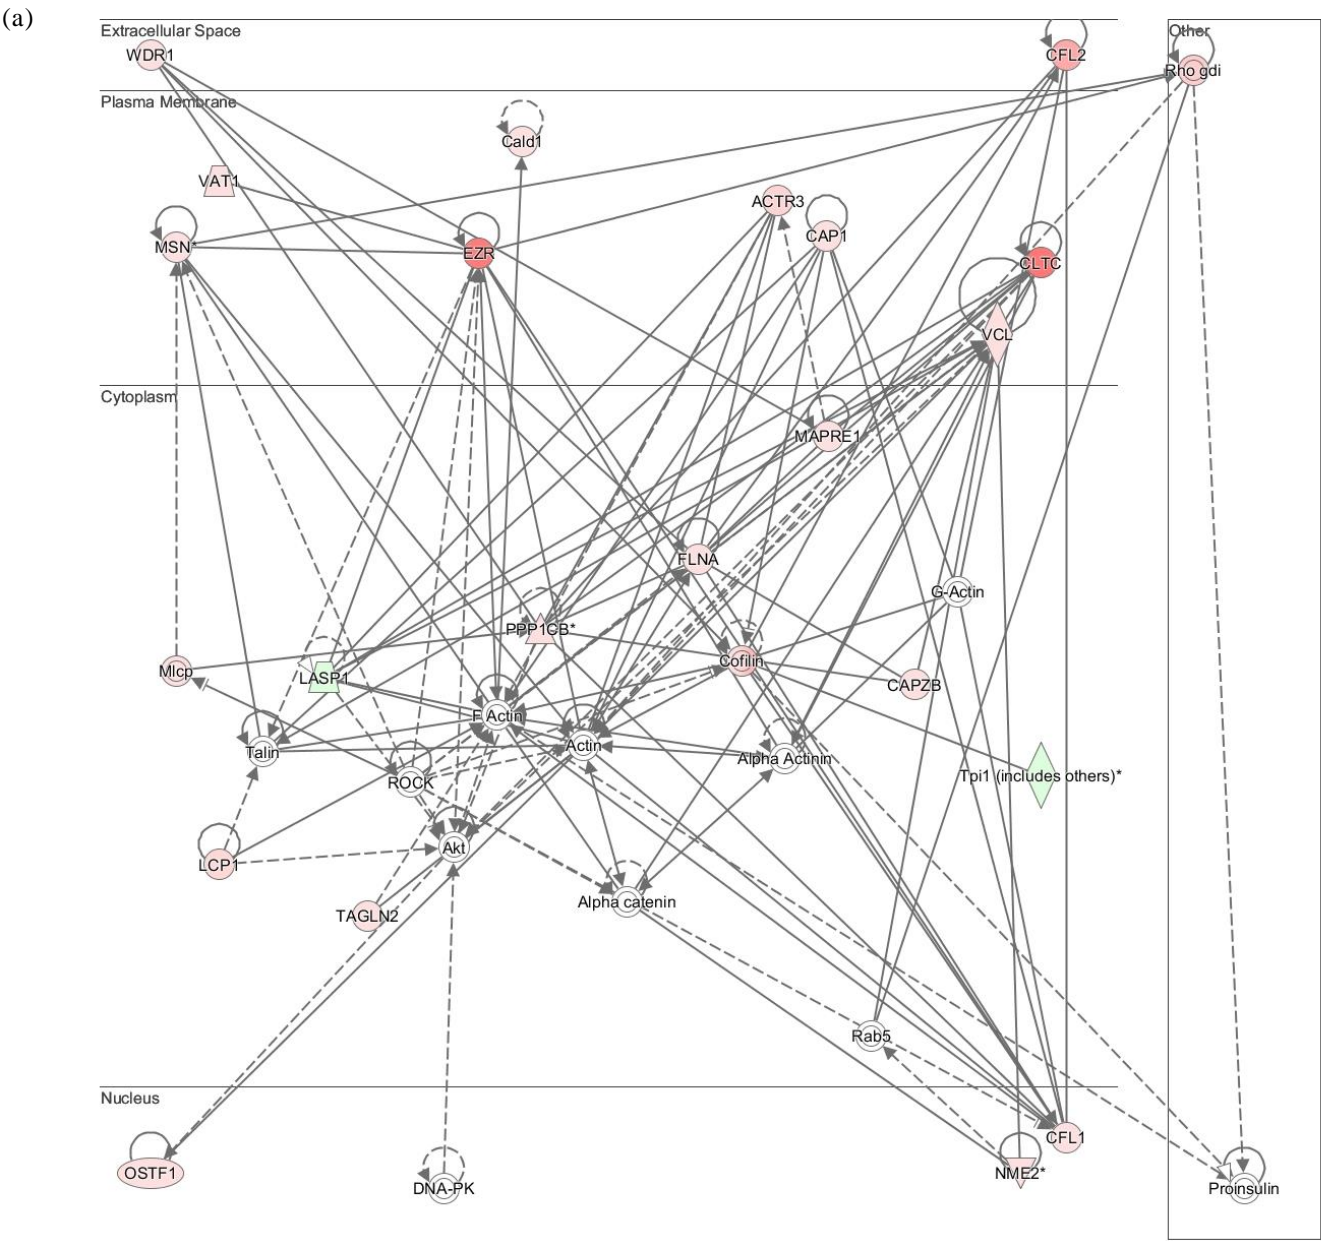

**Figure S5.** IPA® network linked to cell morphology, cellular assembly and organization, function and maintenance (a). The network was assembled from E<sub>2</sub>-regulated proteins in the uterus of OVX rats through identification by label-free shotgun proteomics . Red symbols: upregulated, green symbols: downregulated by the hormone; solid line: direct relationship, dashed line: indirect relationship. See [http://qiagen.force.com/KnowledgeBase/articles/Basic\\_Technical\\_Q\\_A/Legend](http://qiagen.force.com/KnowledgeBase/articles/Basic_Technical_Q_A/Legend) for further details on symbols and relationships. (b) Top canonical pathways and their corresponding molecular targets associated with the network shown. Z-scores indicate activation or suppression of the corresponding pathway (positive or negative values, respectively; N/A: no prediction can be made).

(a)

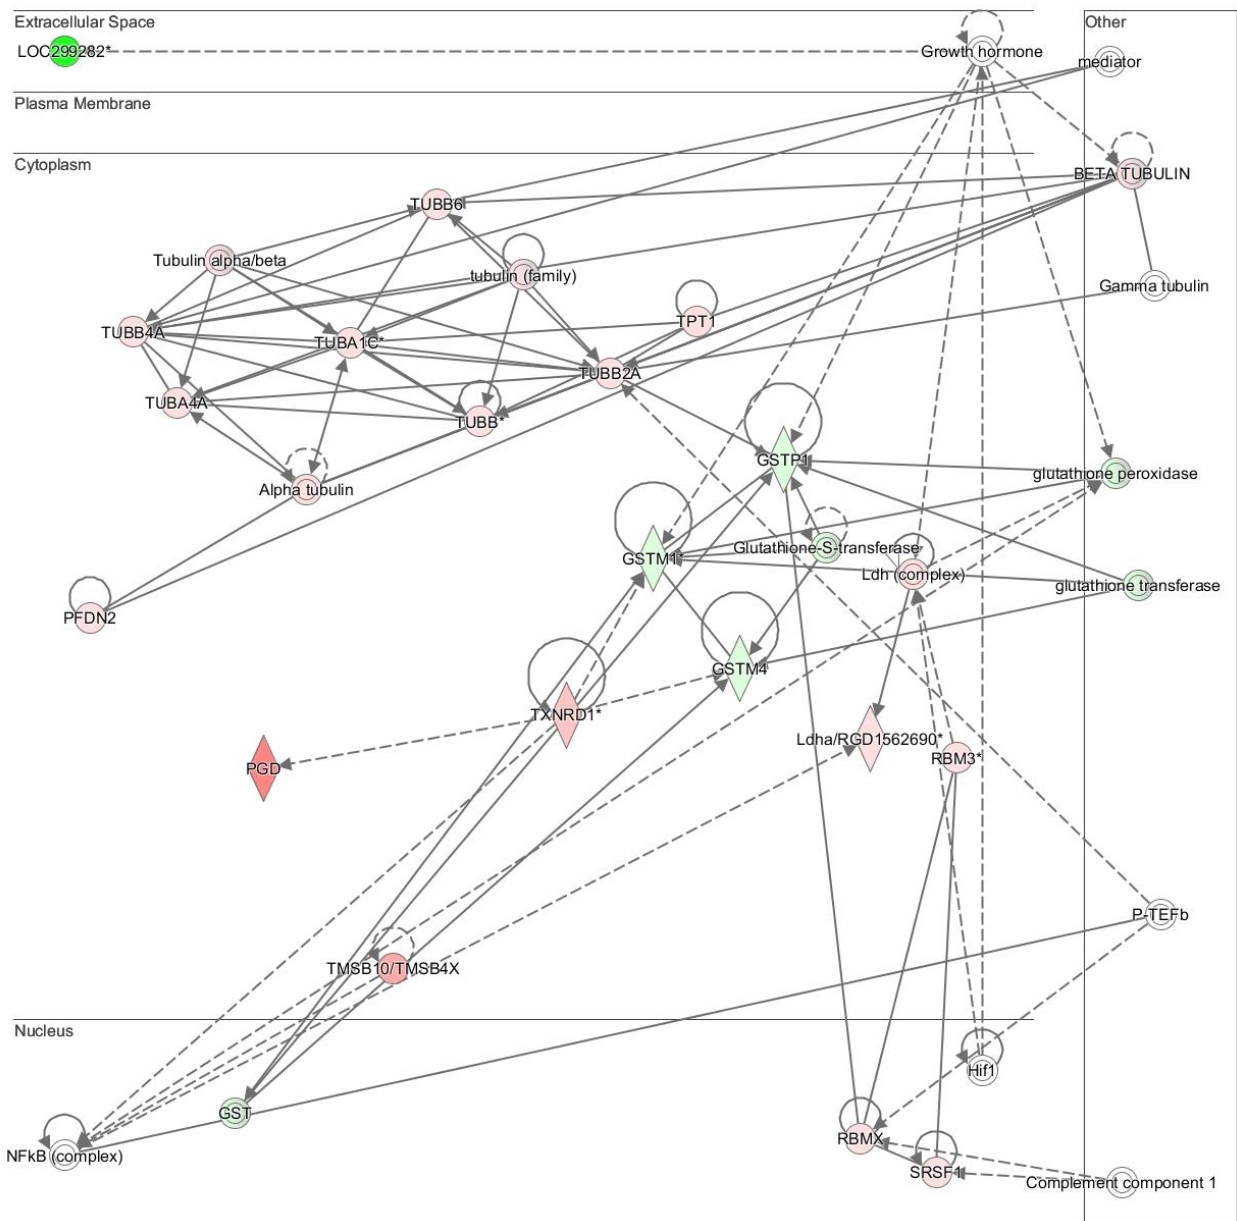

**(b)**

| Canonical pathway                      | Target molecules                                                                                                              | Z-score | P-value  |
|----------------------------------------|-------------------------------------------------------------------------------------------------------------------------------|---------|----------|
| Epithelial adherens junction signaling | Alpha tubulin, beta tubulin, gamma tubulin, TUBA1C, TUBA4A, TUBB6, TUBB, TUBB2A, TUBB4A, Tubulin (family), tubulin alpha/beta | N/A     | 1.31E-07 |
| 14-3-3 mediated signaling              | Alpha tubulin, beta tubulin, gamma tubulin, TUBA1C, TUBA4A, TUBB6, TUBB, TUBB2A, TUBB4A, Tubulin (family), tubulin alpha/beta | N/A     | 3.36E-05 |

**Figure S6.** IPA® network linked to cancer, endocrine system disorder, organismal injury and abnormalities (a). The network was assembled from E<sub>2</sub>-regulated proteins in the uterus of OVX rats through identification by label-free shotgun proteomics. Red symbols: upregulated, green symbols: downregulated by the hormone; solid line: direct relationship, dashed line: indirect relationship. For further details on symbols and relationships, see [http://qiagen.force.com/KnowledgeBase/articles/Basic\\_Technical\\_Q\\_A/Legend](http://qiagen.force.com/KnowledgeBase/articles/Basic_Technical_Q_A/Legend). (b) Top canonical pathways and their corresponding molecular targets associated with the network shown. Z-scores indicate activation or suppression of the corresponding pathway (positive or negative values, respectively; N/A: no prediction can be made).

(a)

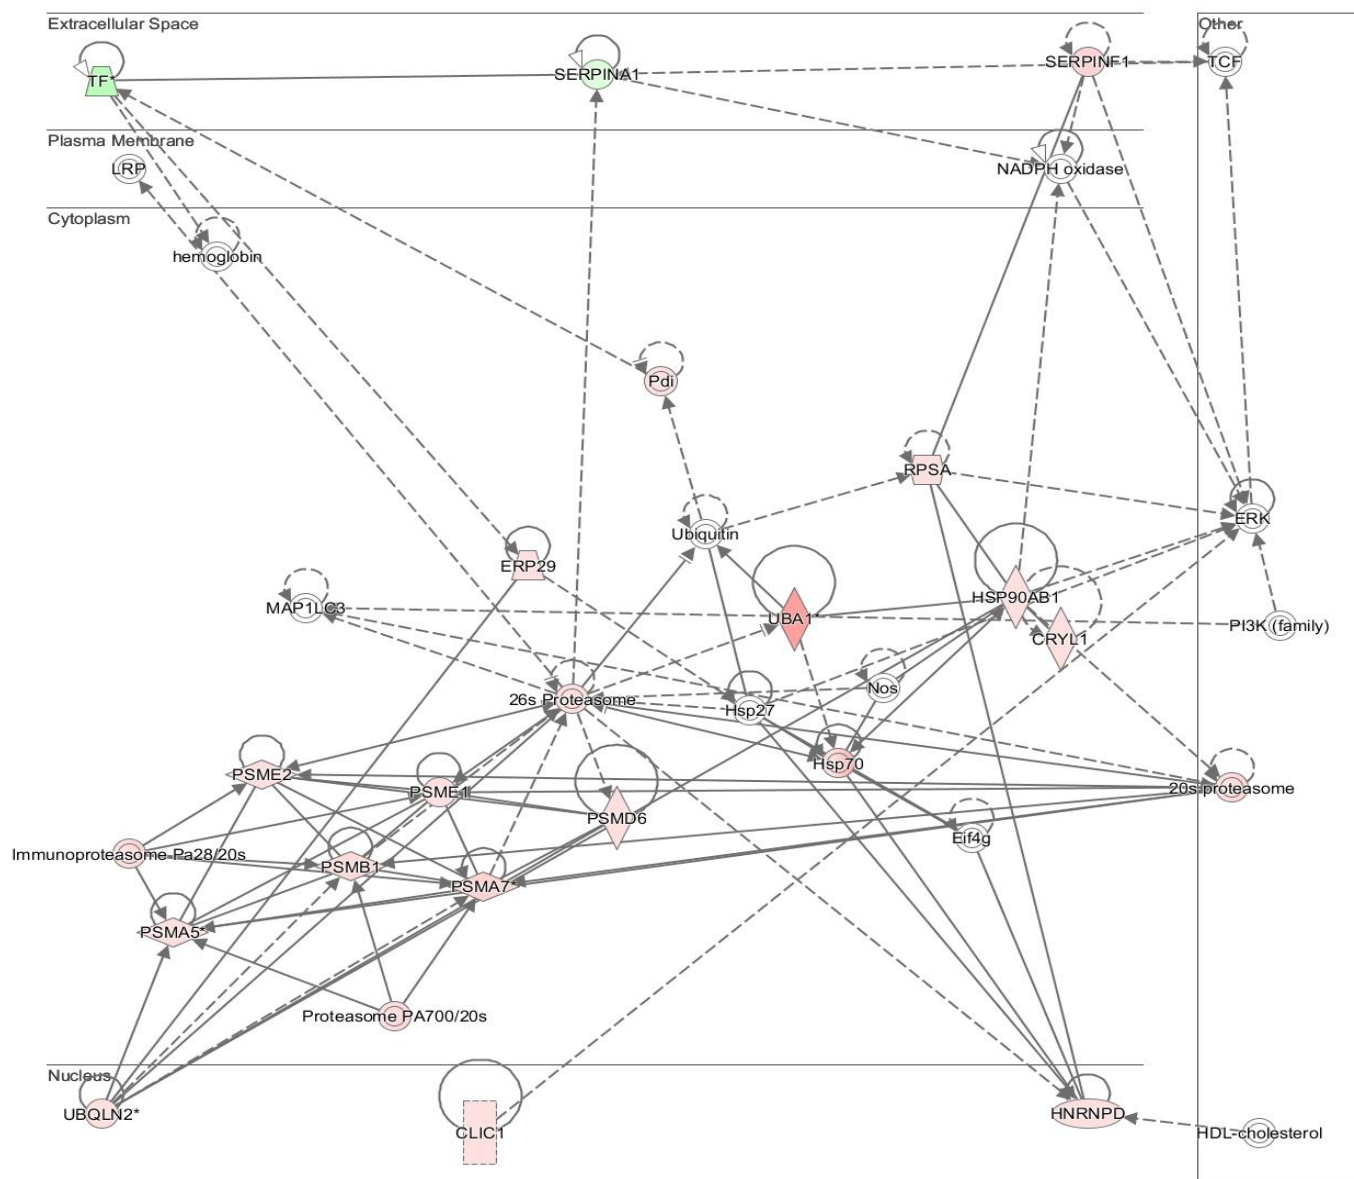

(b)

| Canonical pathway              | Target molecules                                                                                                                                                      | Z-score | P-value  |
|--------------------------------|-----------------------------------------------------------------------------------------------------------------------------------------------------------------------|---------|----------|
| Protein ubiquitination pathway | 20s proteasome, 26s proteasome, Hsp27, HSP70, HSP90AB1, Immunoproteasome, Pa28/20S, Proteasome PA700/20s, PSMA5*, PSAM7*, PSMB1, PSMD6, PSME1, PSME2, uba1, ubiquitin | Na      | 5.79E-07 |
| Estrogen receptor signaling    | ERK, HDL-cholesterol, HNRNPD, HSP90AB1, Nos, P13K (family)                                                                                                            | 0.45    | 2.35E-03 |

**Figure S7.** IPA® network linked to gene expression, RNA damage and repair, and RNA post-transcriptional modification (a). The network was assembled from E<sub>2</sub>-regulated proteins in the uterus of OVX rats through identification by label-free shotgun proteomics. Red symbols: upregulated, green symbols: downregulated by the hormone; solid line: direct relationship, dashed line: indirect relationship. For further details on symbols and relationships, see [http://qiagen.force.com/KnowledgeBase/articles/Basic\\_Technical\\_Q\\_A/Legend](http://qiagen.force.com/KnowledgeBase/articles/Basic_Technical_Q_A/Legend). Inset table (b): Top canonical pathways and their corresponding molecular targets associated with the network shown. Z-scores indicate activation or suppression of the corresponding pathway (positive or negative values, respectively; N/A: no prediction can be made).

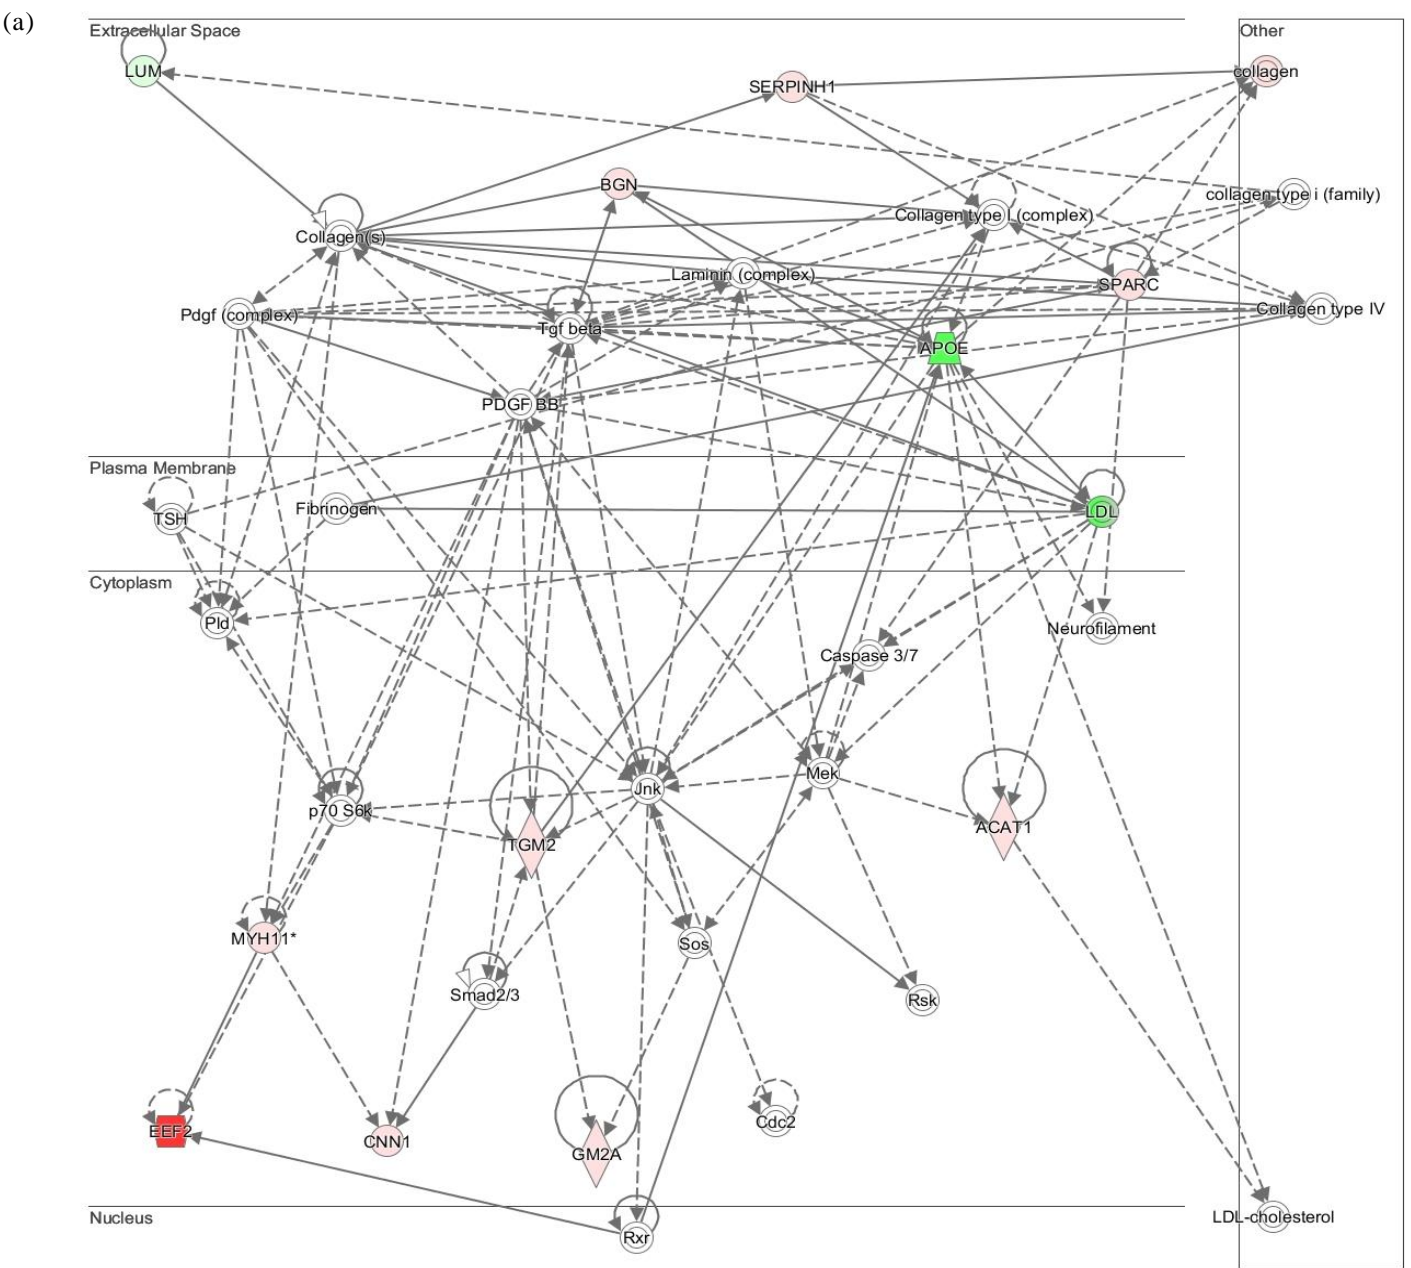

(b)

| Canonical pathway                 | Target molecules                                       | Z-score | P-value  |
|-----------------------------------|--------------------------------------------------------|---------|----------|
| PPARa/RXRa activation             | Jnk, LDL, Mek, Rxr, Smad2/3, Sos, Tgf beta             | -2      | 4.67E-02 |
| Glucocorticoid receptor signaling | Fibrinogen, Jnk, Mek, Rsk, Rxr, Smad2/3, Sos, Tgf beta | N/A     | 1.04E-06 |

**Figure S8.** IPA® network linked to metabolic disease, organismal injury and abnormalities (a). The network was assembled from E<sub>2</sub>-regulated proteins in the uterus of OVX rats through identification by label-free shotgun proteomics. Red symbols: upregulated, green symbols: downregulated by the hormone; solid line: direct relationship, dashed line: indirect relationship. For further details on symbols and relationships, see [http://qiagen.force.com/KnowledgeBase/articles/Basic\\_Technical\\_Q\\_A/Legend](http://qiagen.force.com/KnowledgeBase/articles/Basic_Technical_Q_A/Legend). (b) Top canonical pathways and their corresponding molecular targets associated with the network shown. Z-scores indicate activation or suppression of the corresponding pathway (positive or negative values, respectively; N/A: no prediction can be made).



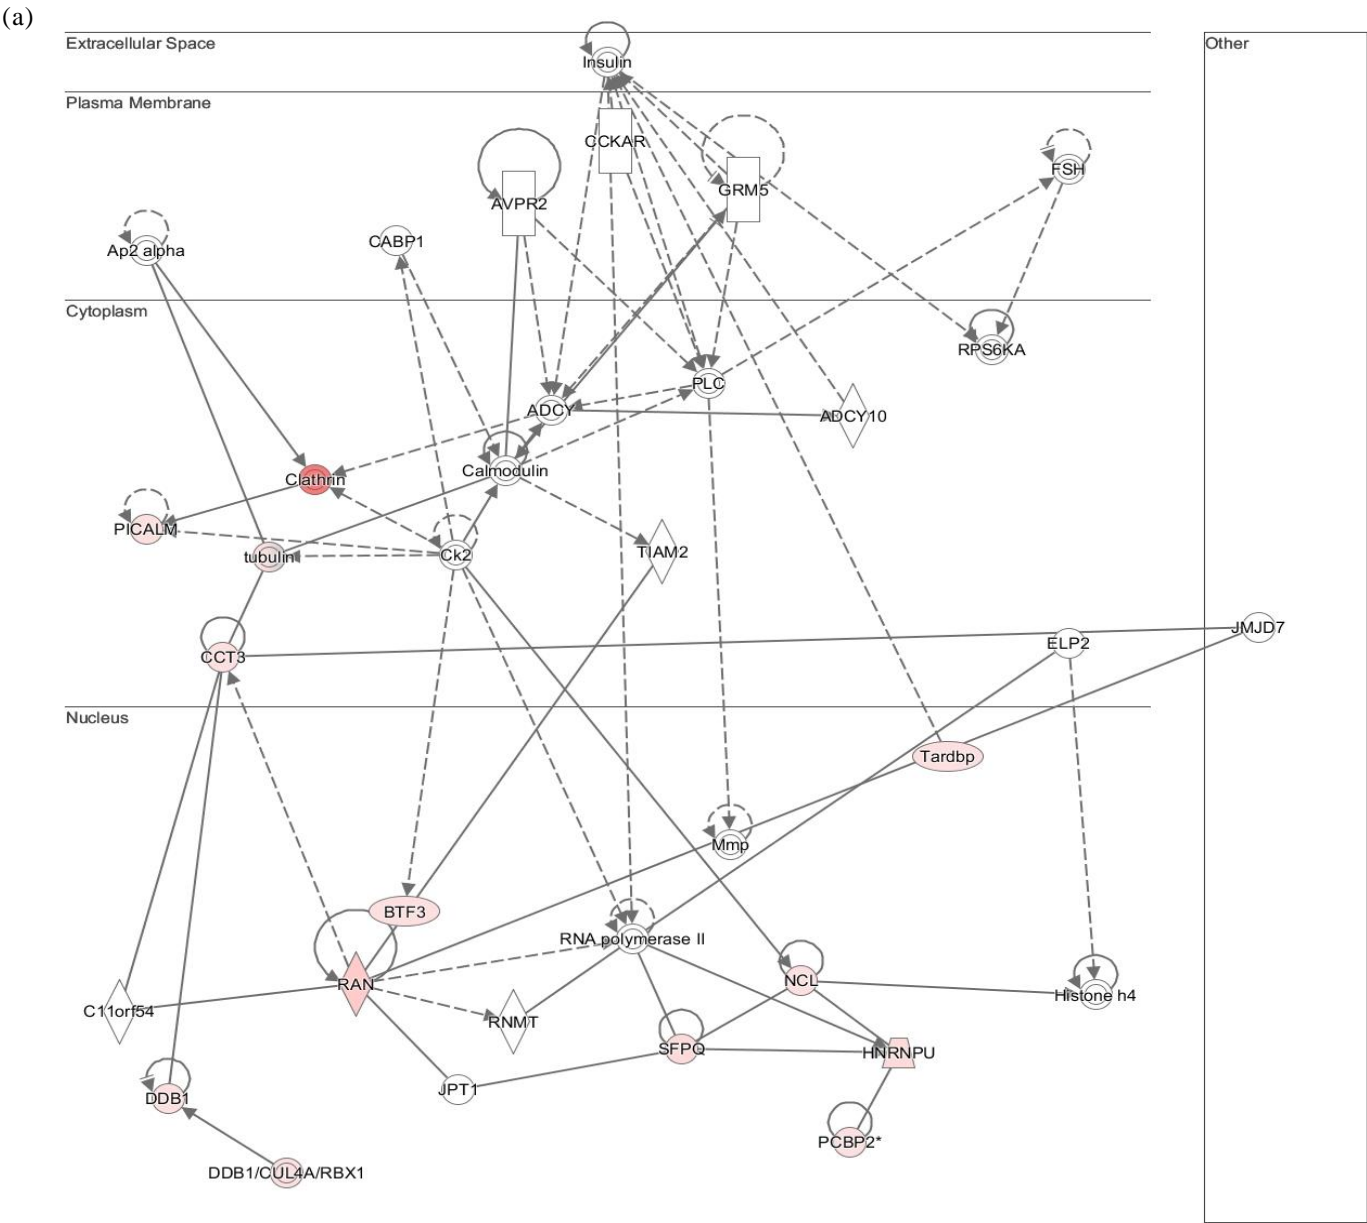

(b)

| Canonical pathway                       | Target molecules                          | Z-score | P-value  |
|-----------------------------------------|-------------------------------------------|---------|----------|
| Clathrin mediated endocytosis signaling | Ap2alpha, CK2, Clathrin, Insulin, PICALM  | N/A     | 4.53E-04 |
| Estrogen receptor signaling             | ADCY10, ADCY, Mmp, PLC, RNA polymerase II | 0.45    | 2.35E-03 |

**Figure S9.** IPA® network linked to development disorder, hereditary disorder and RNA post-transcriptional modification (a). The network was assembled from E<sub>2</sub>-regulated proteins in the uterus of OVX rats through identification by label-free shotgun proteomics. Red symbols: upregulated, green symbols: downregulated by the hormone; solid line: direct relationship, dashed line: indirect relationship. See [http://qiagen.force.com/KnowledgeBase/articles/Basic\\_Technical\\_Q\\_A/Legend](http://qiagen.force.com/KnowledgeBase/articles/Basic_Technical_Q_A/Legend) for further details on symbols and relationships. (b) Top canonical pathways and their corresponding molecular targets associated with the network shown. Z-scores indicate activation or suppression of the corresponding pathway (positive or negative values, respectively; N/A: no prediction can be made).

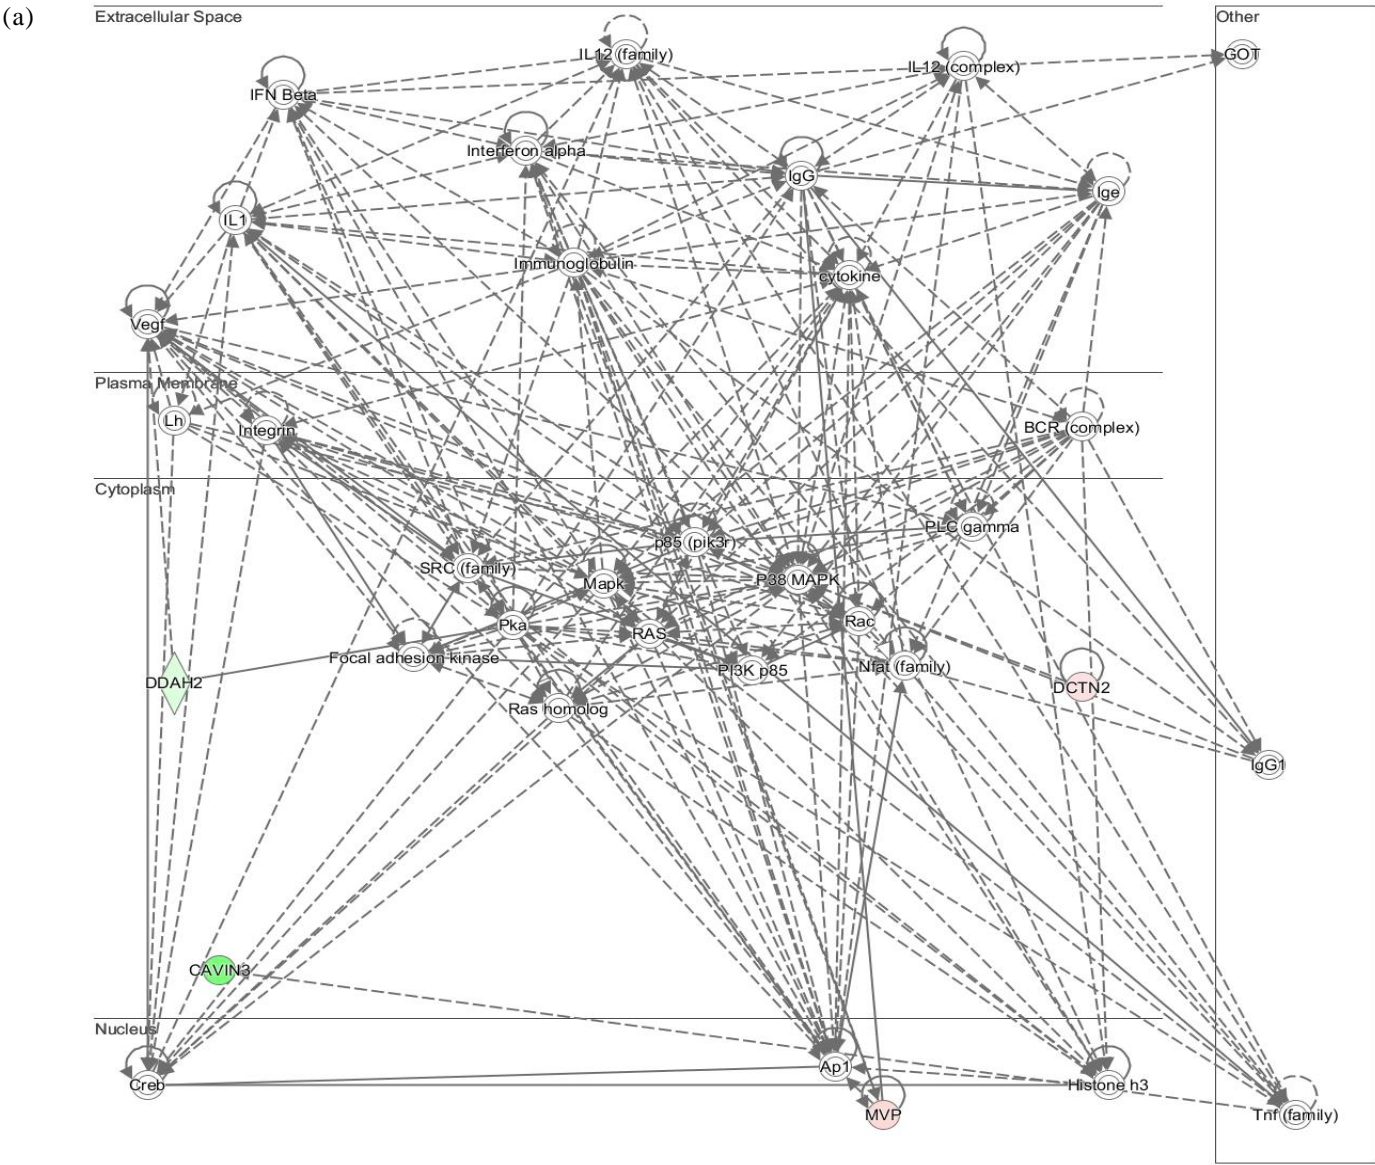

(b)

| Canonical pathway           | Target molecules                                                                                             | Z-score | P-value  |
|-----------------------------|--------------------------------------------------------------------------------------------------------------|---------|----------|
| Estrogen receptor signaling | Ap1, Creb, Mapk, p38 Mapk, p85, PI3K P85, Pka, PLC gamma, RAS, Ras homolog, SRC (Family), Vegf               | 0.45    | 2.35E-03 |
| ILK signaling               | Ap1, creb, focal adhesion kinase, integrin, mapk, p38 Mapk, p85, P13Kp85, Rac, Ras homolog, Tnf family, Vegf | 1.4     | 6.32E-05 |

**Figure S10.** IPA® network linked to carbohydrate metabolism, drug metabolism and molecular transport (a). The network was assembled from E<sub>2</sub>-regulated proteins in the uterus of OVX rats through identification by label-free shotgun proteomics. Red symbols: upregulated, green symbols: downregulated by the hormone; solid line: direct relationship, dashed line: indirect relationship. For further details on symbols and relationships, see [http://qiagen.force.com/KnowledgeBase/articles/Basic\\_Technical\\_Q\\_A/Legend](http://qiagen.force.com/KnowledgeBase/articles/Basic_Technical_Q_A/Legend). Inset table (b) Top canonical pathways and their corresponding molecular targets associated with the network shown. Z-scores indicate activation or suppression of the corresponding pathway (positive or negative values, respectively; N/A: no prediction can be made).

Figure S1

Figure S2

Figure S9

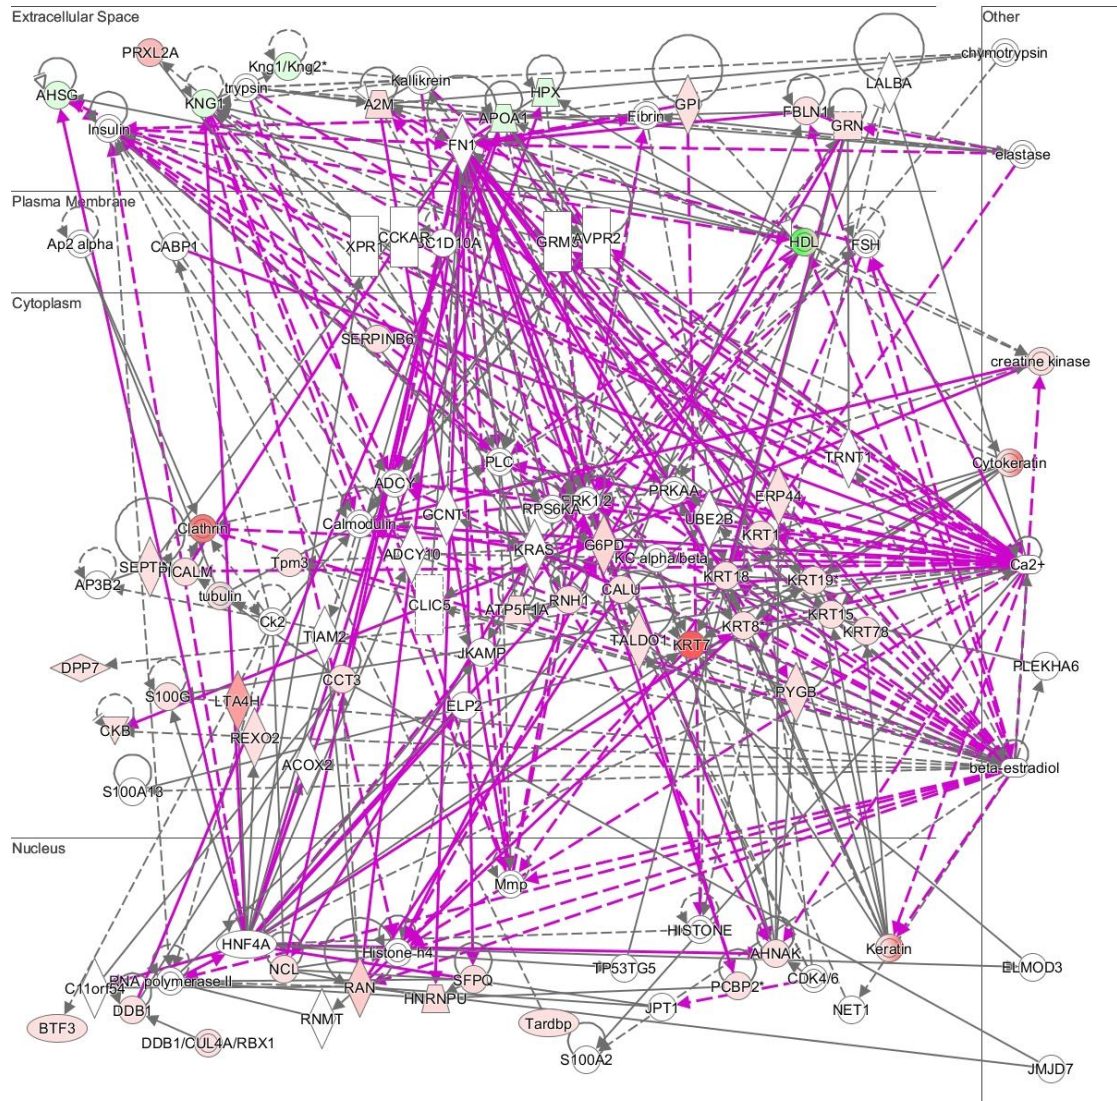

Figure S11. Overlapping IPA® networks.



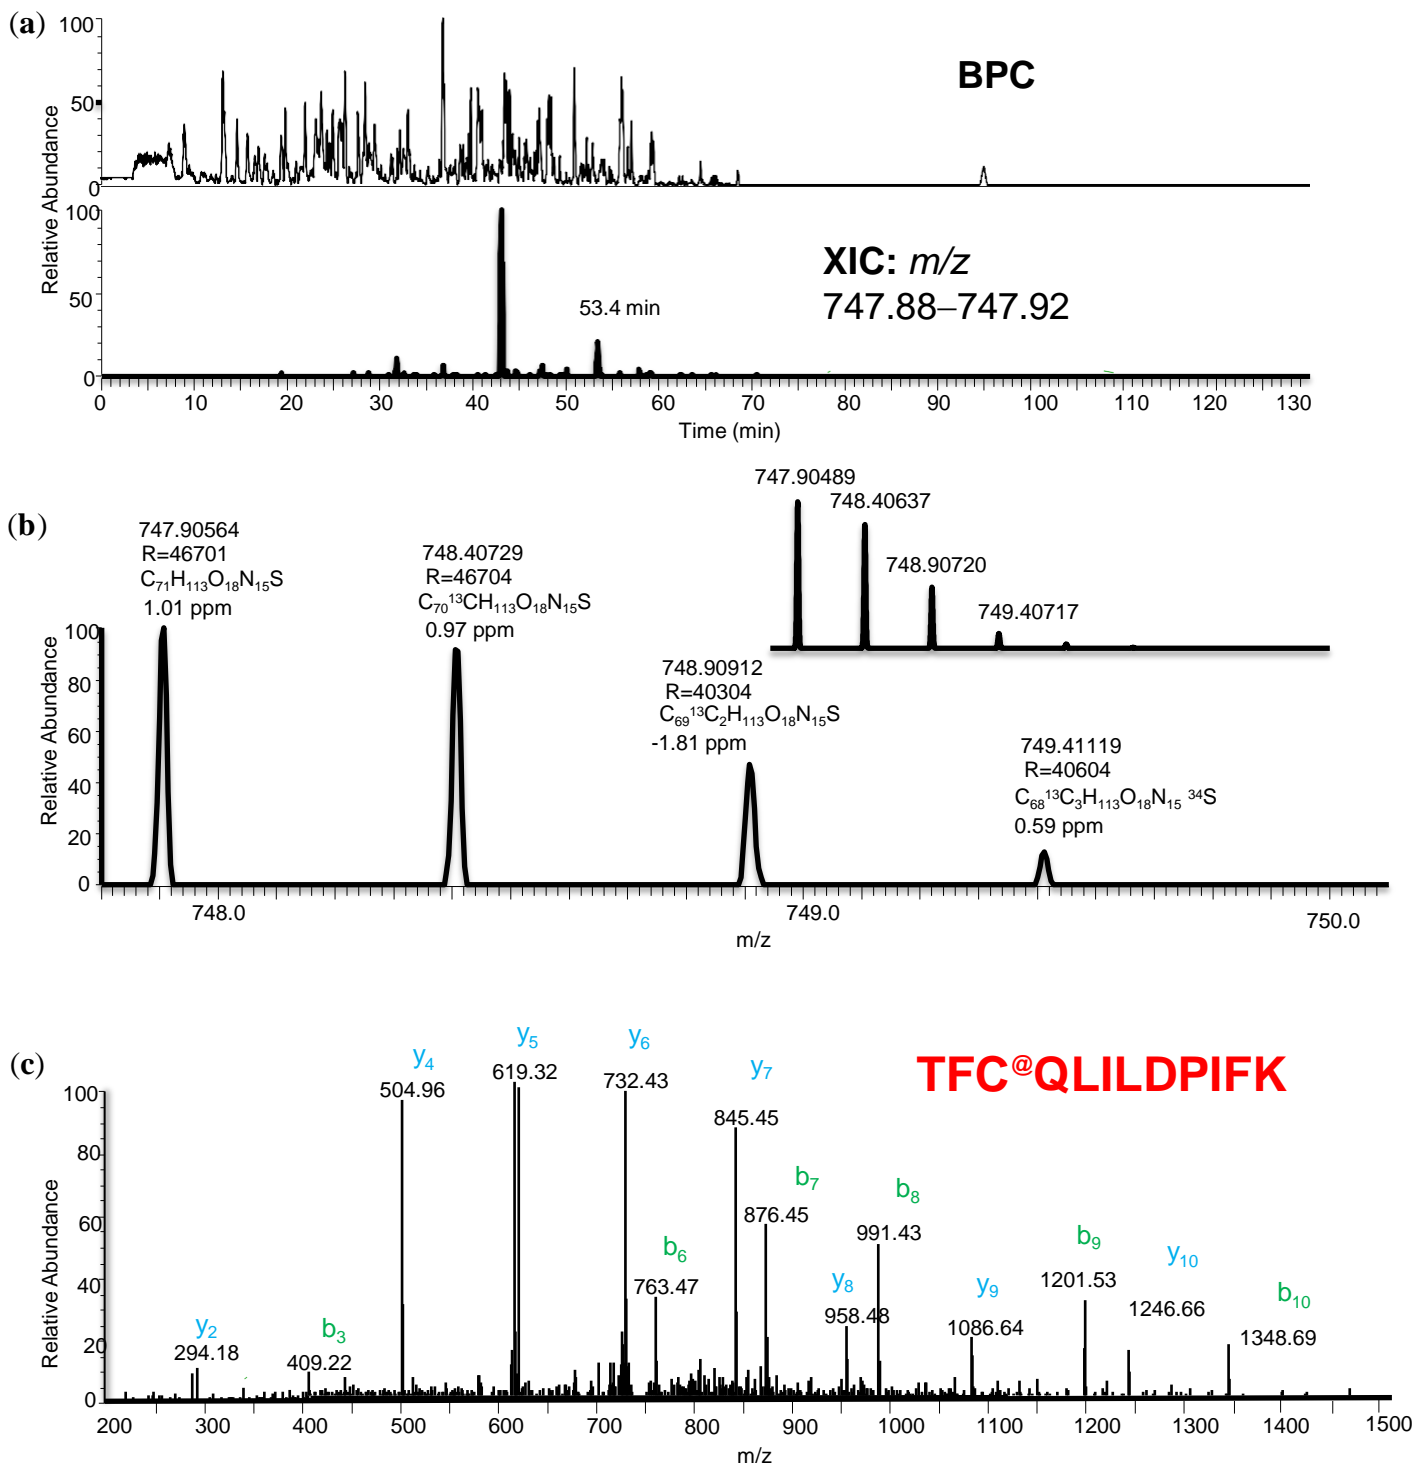

**Figure S12.** Screening from acquired high mass resolution (Orbitrap) mass spectra during the untargeted shotgun acquisitions for EEF2 as a prioritized uterine protein marker for targeted assay development. **(a)** Locating a proteotypic tryptic peptide of EEF2 by accurate mass of its doubly-charged ion  $[M+2H]^{2+}$  (BPC: Base-peak ion chromatogram, XIC: Accurate-mass extracted ion chromatogram); **(b)** Verifying accurate masses and isotope peak distribution of the doubly-charged ions (R: mass resolution, inset: theoretical  $m/z$  and isotope peak distribution); **(c)** Confirming the peptide sequence TFC@QLILDPIFK by the acquired ion-trap MS/MS scan (b and y sequence ions marked according to nomenclature by Roepstorff and Fohlman [41]; C<sup>@</sup> is carbamidomethylated cysteine).



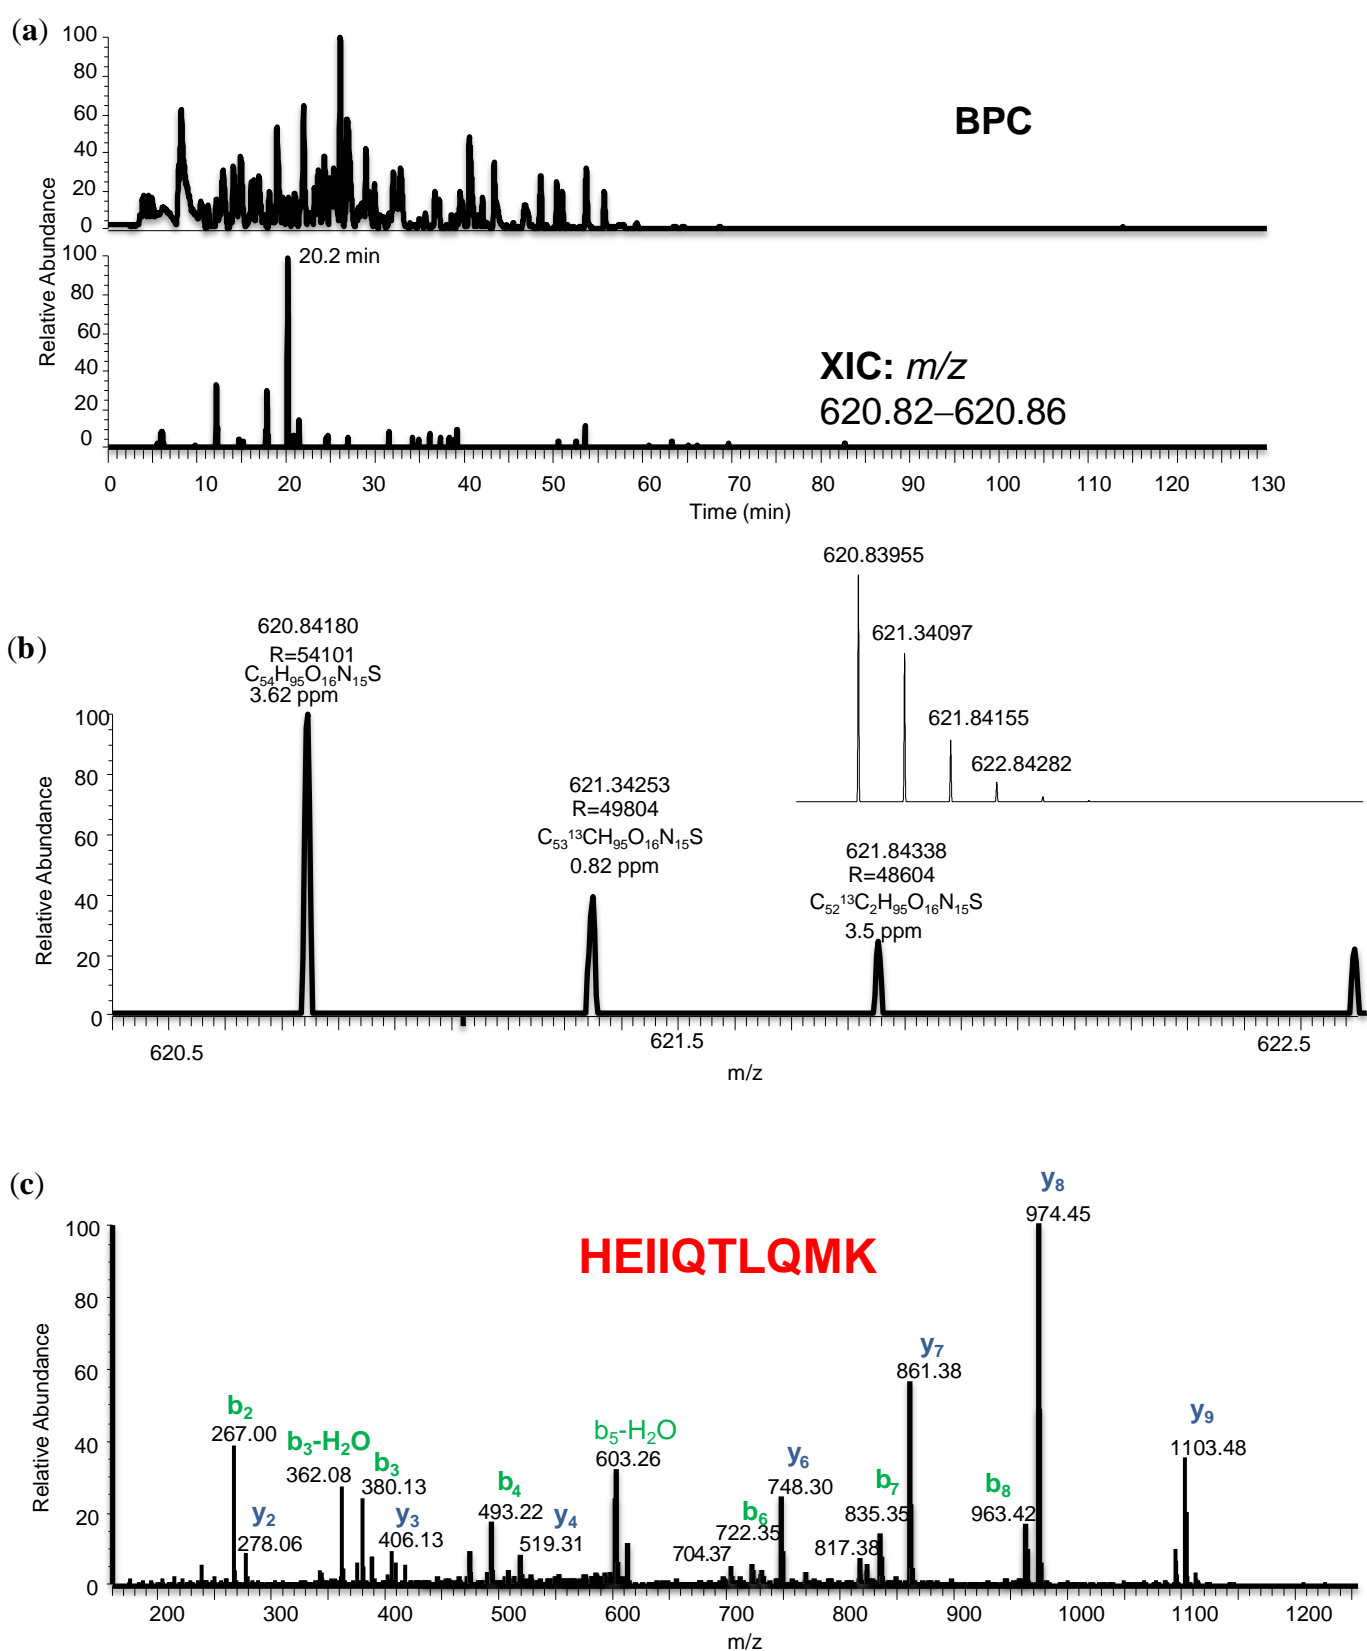

**Figure S13.** Screening from acquired high mass resolution (Orbitrap) mass spectra during the untargeted shotgun acquisitions for SELENBP1 as a prioritized uterine protein marker for targeted assay development. **(a)** Locating a proteotypic tryptic peptide of SELENBP1 by accurate mass of its doubly-charged ion  $[M+2H]^{2+}$  (BPC: Base-peak ion chromatogram, XIC: Accurate-mass extracted ion chromatogram); **(b)** Verifying accurate masses and isotope peak distribution of the doubly-charged ions (R: mass resolution, inset: theoretical  $m/z$  and isotope peak distribution); **(c)** Confirming the peptide sequence HEIIQTLQMK by the acquired ion-trap MS/MS scan (b and y sequence ions marked according to nomenclature by Roepstorff and Fohlman [41]).

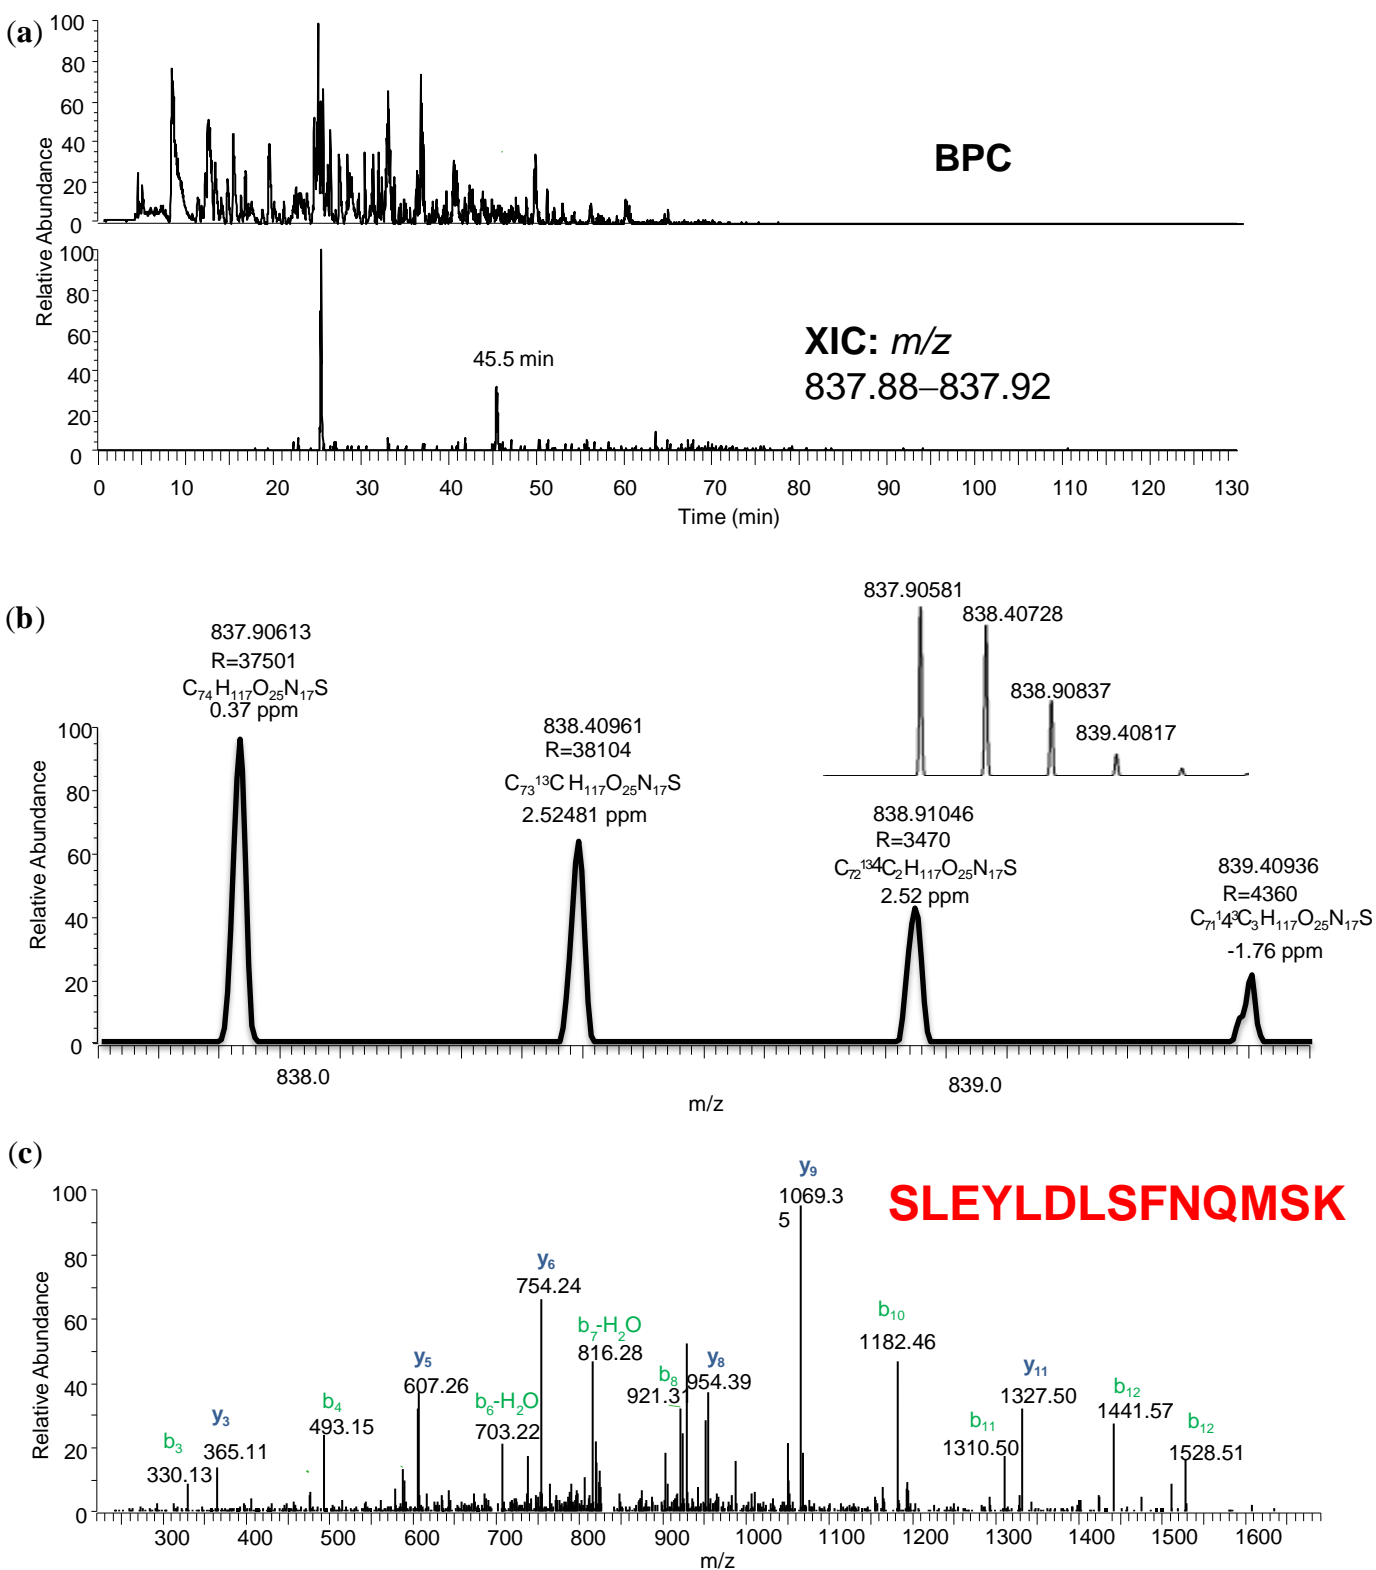

**Figure S14.** Screening from acquired high mass resolution (Orbitrap) mass spectra during the untargeted shotgun acquisitions for LUM as a prioritized uterine protein marker for targeted assay development. **(a)** Locating a proteotypic tryptic peptide of LUM by accurate mass of its doubly-charged ion  $[M+2H]^{2+}$  (BPC: Base-peak ion chromatogram, XIC: Accurate-mass extracted ion chromatogram); **(b)** Verifying accurate masses and isotope peak distribution of the doubly-charged ions (R: mass resolution, inset: theoretical  $m/z$  and isotope peak distribution); **(c)** Confirming the peptide sequence SLEYLDLSFNQMSK by the acquired ion-trap MS/MS scan (b and y sequence ions marked according to nomenclature by Roepstorff and Fohlman[41]).
