# Supplementary material for: Proteomics Complementation of the Rat Uterotrophic Assay for Estrogenic Endocrine Disruptors: A Roadmap of Advancing High Resolution Mass Spectrometry-Based Shotgun Survey to Targeted Biomarker Quantifications
Source: Int J Mol Sci. 2021 Feb 8;22(4):1686. doi: 10.3390/ijms22041686 (PMC7914934; doi:10.3390/ijms22041686)
Supplement: Supplementary file 1 [file ijms-22-01686-s001.zip]

Archive with 4 entries (4 files):
- ijms-1078409_FiguresS1-S14.pdf
- ijms-1078409_TableS1.xlsx
- ijms-1078409_TableS2.xlsx
- ijms-1078409_TableS3.pdf
