# Supplementary material for: Proteomics Complementation of the Rat Uterotrophic Assay for Estrogenic Endocrine Disruptors: A Roadmap of Advancing High Resolution Mass Spectrometry-Based Shotgun Survey to Targeted Biomarker Quantifications
Source: Int J Mol Sci. 2021 Feb 8;22(4):1686. doi: 10.3390/ijms22041686 (PMC7914934; doi:10.3390/ijms22041686)
Supplement: Supplementary file 1 [file ijms-22-01686-s001.zip › ijms-1078409_TableS1.xlsx]

## Sheet: With annotations SC_fdr1_rat ut
Table S1. List of identified and validated proteins (Scaffold 4.9.0: >95% and >99% probability by Peptide Prophet and Protein Prophet, respectively, with minimum of two unique peptides) in the rat uterus, along with their gene ontology (GO) annotations.
		GO annotations
Identified Proteins [774 (10 decoys+2 filtered out by Scaffold were excluded); 615 clusters]	Accession Number	biological adhesion	biological regulation	cell killing	cellular process	developmental process	establishment of localization	growth	immune system process	localization	locomotion	metabolic process	multi-organism process	multicellular organismal process	pigmentation	reproduction	reproductive process	response to stimulus	rhythmic process	viral process	Golgi apparatus	cytoplasm	cytoskeleton	endoplasmic reticulum	endosome	extracellular region	intracellular organelle	membrane	mitochondrion	nucleus	organelle membrane	organelle part	plasma membrane	ribosome	antioxidant activity	transport	binding	catalytic activity	obsolete chaperone regulator activity	chemoattractant activity	chemorepellent activity	electron carrier activity	enzyme regulator activity	metallochaperone activity	molecular function	molecular transducer activity	motor activity	nutrient reservoir activity	protein tag
60S ribosomal protein L30 OS=Rattus norvegicus OX=10116 GN=Rpl30 PE=3 SV=2	RL30_RAT		killing of cells of other organism, positive regulation of selenocysteine incorporation	killing of cells of other organism	cytoplasmic translation	liver regeneration			antimicrobial humoral immune response mediated by antimicrobial peptide			cytoplasmic translation	antimicrobial humoral immune response mediated by antimicrobial peptide, defense response to Gram-negative bacterium, killing of cells of other organism	liver regeneration				antimicrobial humoral immune response mediated by antimicrobial peptide, defense response to Gram-negative bacterium				cytosol, cytosolic large ribosomal subunit, polysomal ribosome, ribosome					cytosolic large ribosomal subunit, nucleus, polysomal ribosome, ribosome			nucleus		cytosolic large ribosomal subunit		cytosolic large ribosomal subunit, polysomal ribosome			selenocysteine insertion sequence binding								selenocysteine insertion sequence binding, structural constituent of ribosome
Actin-related protein 2/3 complex subunit 3 OS=Rattus norvegicus OX=10116 GN=Arpc3 PE=1 SV=1	B2GV73_RAT
3-hydroxyacyl-CoA dehydrogenase type-2 OS=Rattus norvegicus OX=10116 GN=Hsd17b10 PE=1 SV=1	B0BMW2_RAT (+1)
Dipeptidyl peptidase 2 OS=Rattus norvegicus OX=10116 GN=Dpp7 PE=1 SV=1	DPP2_RAT											proteolysis									Golgi apparatus	Golgi apparatus, cytoplasmic vesicle, cytosol, lysosome				extracellular region	Golgi apparatus, cytoplasmic vesicle, lysosome											dipeptidyl-peptidase activity, serine-type peptidase activity							dipeptidyl-peptidase activity, serine-type peptidase activity
Peptidyl-prolyl cis-trans isomerase B OS=Rattus norvegicus OX=10116 GN=Ppib PE=1 SV=3	PPIB_RAT		positive regulation by host of viral genome replication, positive regulation of multicellular organism growth, protein stabilization		chaperone-mediated protein folding, protein peptidyl-prolyl isomerization, protein refolding	bone development	nuclear transport			nuclear transport		protein peptidyl-prolyl isomerization	positive regulation by host of viral genome replication	bone development								endoplasmic reticulum chaperone complex, endoplasmic reticulum lumen, melanosome, perinuclear region of cytoplasm, smooth endoplasmic reticulum		endoplasmic reticulum chaperone complex, endoplasmic reticulum lumen, smooth endoplasmic reticulum			endoplasmic reticulum chaperone complex, endoplasmic reticulum lumen, melanosome, nucleus, smooth endoplasmic reticulum			nucleus		endoplasmic reticulum chaperone complex, endoplasmic reticulum lumen					RNA polymerase binding, cyclosporin A binding, unfolded protein binding	peptidyl-prolyl cis-trans isomerase activity							RNA polymerase binding, cyclosporin A binding, peptidyl-prolyl cis-trans isomerase activity, unfolded protein binding
Protein S100-G OS=Rattus norvegicus OX=10116 GN=S100g PE=1 SV=3	S100G_RAT																											apical plasma membrane, basolateral plasma membrane					apical plasma membrane, basolateral plasma membrane				calcium ion binding, transition metal ion binding, vitamin D binding								calcium ion binding, transition metal ion binding, vitamin D binding
Alpha-1,4 glucan phosphorylase OS=Rattus norvegicus OX=10116 GN=Pygb PE=1 SV=2	G3V6Y6_RAT
Isochorismatase domain-containing protein 1 OS=Rattus norvegicus OX=10116 GN=LOC103694869 PE=1 SV=1	F2Z3T7_RAT (+1)
Transcription factor BTF3 OS=Rattus norvegicus OX=10116 GN=Btf3 PE=1 SV=1	Q5U3Y8_RAT
Cluster of Pcbp2 protein OS=Rattus norvegicus OX=10116 GN=Pcbp2 PE=1 SV=1 (Q4V8F6_RAT)	Q4V8F6_RAT [3]
Pcbp2 protein OS=Rattus norvegicus OX=10116 GN=Pcbp2 PE=1 SV=1	Q4V8F6_RAT (+1)
Poly(rC)-binding protein 3 OS=Rattus norvegicus OX=10116 GN=Pcbp3 PE=1 SV=1	Q6AY48_RAT
RCG31562, isoform CRA_c OS=Rattus norvegicus OX=10116 GN=Tardbp PE=1 SV=1	I6L9G6_RAT
Microfibril associated protein 4 OS=Rattus norvegicus OX=10116 GN=LOC102553715 PE=1 SV=3	D4A7W8_RAT (+1)
Similar to 60S ribosomal protein L23a OS=Rattus norvegicus OX=10116 GN=LOC689899 PE=3 SV=1	D3ZTH8_RAT (+2)
Collagen type VI alpha 1 chain OS=Rattus norvegicus OX=10116 GN=Col6a1 PE=1 SV=1	D3ZUL3_RAT
Leukotriene A(4) hydrolase OS=Rattus norvegicus OX=10116 GN=Lta4h PE=1 SV=1	Q499P2_RAT
DNA damage-binding protein 1 OS=Rattus norvegicus OX=10116 GN=Ddb1 PE=1 SV=1	G3V8T4_RAT
Eukaryotic translation initiation factor 2 subunit 1 OS=Rattus norvegicus OX=10116 GN=Eif2s1 PE=1 SV=2	IF2A_RAT		negative regulation of guanyl-nucleotide exchange factor activity, negative regulation of translational initiation in response to stress, positive regulation of neuron death, positive regulation of type B pancreatic cell apoptotic process		cellular response to UV, cellular response to amino acid starvation, cellular response to heat, cellular response to oxidative stress, negative regulation of translational initiation in response to stress, protein autophosphorylation, response to manganese-induced endoplasmic reticulum stress, stress granule assembly	aging						protein autophosphorylation						cellular response to UV, cellular response to amino acid starvation, cellular response to heat, cellular response to oxidative stress, negative regulation of translational initiation in response to stress, response to manganese-induced endoplasmic reticulum stress				cytoplasmic stress granule, eukaryotic 48S preinitiation complex, eukaryotic translation initiation factor 2 complex, eukaryotic translation initiation factor 2B complex, multi-eIF complex, translation initiation ternary complex					cytoplasmic stress granule, nucleus			nucleus							ribosome binding, translation initiation factor activity								ribosome binding, translation initiation factor activity
Rho GDP dissociation inhibitor beta OS=Rattus norvegicus OX=10116 GN=Arhgdib PE=1 SV=1	Q5M860_RAT
T-complex protein 1 subunit gamma OS=Rattus norvegicus OX=10116 GN=Cct3 PE=1 SV=1	TCPG_RAT		positive regulation of establishment of protein localization to telomere, positive regulation of telomere maintenance via telomerase, protein stabilization		binding of sperm to zona pellucida, pore complex assembly, protein folding		toxin transport			toxin transport			binding of sperm to zona pellucida			binding of sperm to zona pellucida	binding of sperm to zona pellucida					chaperonin-containing T-complex	microtubule				microtubule	plasma membrane				microtubule	plasma membrane				ATP binding, unfolded protein binding								ATP binding, unfolded protein binding
Elongation factor 1-gamma OS=Rattus norvegicus OX=10116 GN=Eef1g PE=2 SV=3	EF1G_RAT				response to virus, translational elongation							translational elongation	response to virus					response to virus		response to virus		cytoplasm, endoplasmic reticulum		endoplasmic reticulum			endoplasmic reticulum, nucleus			nucleus							translation elongation factor activity								translation elongation factor activity
Cluster of Eukaryotic translation initiation factor 4A1 OS=Rattus norvegicus OX=10116 GN=Eif4a1 PE=1 SV=1 (Q6P3V8_RAT)	Q6P3V8_RAT [4]		negative regulation of excitatory postsynaptic potential, negative regulation of gene expression, negative regulation of selenocysteine incorporation, negative regulation of selenocysteine insertion sequence binding, nuclear-transcribed mRNA catabolic process, nonsense-mediated decay, positive regulation of translation, regulation of alternative mRNA splicing, via spliceosome, regulation of mRNA …		cellular response to brain-derived neurotrophic factor stimulus, cellular response to selenite ion, mRNA splicing, via spliceosome, nuclear-transcribed mRNA catabolic process, nonsense-mediated decay, rRNA processing	embryonic cranial skeleton morphogenesis	mRNA transport			mRNA transport		mRNA splicing, via spliceosome, nuclear-transcribed mRNA catabolic process, nonsense-mediated decay, rRNA processing		associative learning, embryonic cranial skeleton morphogenesis				cellular response to brain-derived neurotrophic factor stimulus, cellular response to selenite ion, response to organic cyclic compound				postsynaptic cytosol					U2-type catalytic step 1 spliceosome, catalytic step 2 spliceosome, exon-exon junction complex, nuclear speck, nucleolus, nucleus			U2-type catalytic step 1 spliceosome, catalytic step 2 spliceosome, exon-exon junction complex, nuclear speck, nucleolus		U2-type catalytic step 1 spliceosome, catalytic step 2 spliceosome, exon-exon junction complex, nuclear speck, nucleolus					ATP binding, RNA stem-loop binding, poly(A) binding, ribonucleoprotein complex binding, selenocysteine insertion sequence binding	RNA helicase activity							ATP binding, RNA helicase activity, RNA stem-loop binding, poly(A) binding, ribonucleoprotein complex binding, selenocysteine insertion sequence binding, translation regulator activity
Eukaryotic initiation factor 4A-II OS=Rattus norvegicus OX=10116 GN=Eif4a2 PE=1 SV=1	A0A0G2K8B7_RAT (+1)
Eukaryotic translation initiation factor 4A1 OS=Rattus norvegicus OX=10116 GN=Eif4a1 PE=1 SV=1	Q6P3V8_RAT
Eukaryotic initiation factor 4A-III OS=Rattus norvegicus OX=10116 GN=Eif4a3 PE=1 SV=1	IF4A3_RAT		negative regulation of excitatory postsynaptic potential, negative regulation of gene expression, negative regulation of selenocysteine incorporation, negative regulation of selenocysteine insertion sequence binding, nuclear-transcribed mRNA catabolic process, nonsense-mediated decay, positive regulation of translation, regulation of alternative mRNA splicing, via spliceosome, regulation of mRNA …		cellular response to brain-derived neurotrophic factor stimulus, cellular response to selenite ion, mRNA splicing, via spliceosome, nuclear-transcribed mRNA catabolic process, nonsense-mediated decay, rRNA processing	embryonic cranial skeleton morphogenesis	mRNA transport			mRNA transport		mRNA splicing, via spliceosome, nuclear-transcribed mRNA catabolic process, nonsense-mediated decay, rRNA processing		associative learning, embryonic cranial skeleton morphogenesis				cellular response to brain-derived neurotrophic factor stimulus, cellular response to selenite ion, response to organic cyclic compound				postsynaptic cytosol					U2-type catalytic step 1 spliceosome, catalytic step 2 spliceosome, exon-exon junction complex, nuclear speck, nucleolus, nucleus			U2-type catalytic step 1 spliceosome, catalytic step 2 spliceosome, exon-exon junction complex, nuclear speck, nucleolus		U2-type catalytic step 1 spliceosome, catalytic step 2 spliceosome, exon-exon junction complex, nuclear speck, nucleolus					ATP binding, RNA stem-loop binding, poly(A) binding, ribonucleoprotein complex binding, selenocysteine insertion sequence binding	RNA helicase activity							ATP binding, RNA helicase activity, RNA stem-loop binding, poly(A) binding, ribonucleoprotein complex binding, selenocysteine insertion sequence binding, translation regulator activity
Cluster of Thioredoxin reductase 1, cytoplasmic OS=Rattus norvegicus OX=10116 GN=Txnrd1 PE=3 SV=2 (R9PXU4_RAT)	R9PXU4_RAT [5]
Thioredoxin reductase 1, cytoplasmic OS=Rattus norvegicus OX=10116 GN=Txnrd1 PE=3 SV=2	R9PXU4_RAT (+1)
Thioredoxin reductase 2, isoform CRA_a OS=Rattus norvegicus OX=10116 GN=Txnrd2 PE=1 SV=1	A0A0G2K6E2_RAT (+2)
60S acidic ribosomal protein P0 OS=Rattus norvegicus OX=10116 GN=Rplp0 PE=1 SV=2	RLA0_RAT		lactation		cellular response to Thyroid stimulating hormone, cellular response to cAMP, cellular response to phorbol 13-acetate 12-myristate, cytoplasmic translation, ribosomal large subunit assembly	lactation	lactation			lactation		cytoplasmic translation		lactation				cellular response to Thyroid stimulating hormone, cellular response to cAMP, cellular response to phorbol 13-acetate 12-myristate, response to selenium ion				cytosolic large ribosomal subunit					cytosolic large ribosomal subunit, nucleus	membrane		nucleus		cytosolic large ribosomal subunit		cytosolic large ribosomal subunit			large ribosomal subunit rRNA binding, peptide binding								large ribosomal subunit rRNA binding, peptide binding, structural constituent of ribosome
Cluster of Hexokinase-1 OS=Rattus norvegicus OX=10116 GN=Hk1 PE=1 SV=4 (HXK1_RAT)	HXK1_RAT [2]		cellular glucose homeostasis, negative regulation of apoptotic process, regulation of anion channel activity		carbohydrate phosphorylation, cellular glucose homeostasis, fructose 6-phosphate metabolic process, glucose 6-phosphate metabolic process, glycolytic process, peptidyl-serine phosphorylation, peptidyl-threonine phosphorylation, peptidyl-tyrosine phosphorylation, protein autophosphorylation, protein phosphorylation				innate immune response			carbohydrate phosphorylation, fructose 6-phosphate metabolic process, glucose 6-phosphate metabolic process, glycolytic process, mannose metabolic process, peptidyl-serine phosphorylation, peptidyl-threonine phosphorylation, peptidyl-tyrosine phosphorylation, protein autophosphorylation, protein phosphorylation						inflammatory response, innate immune response, response to brassinosteroid, response to hypoxia, response to ischemia, response to ketamine				cytosol, mitochondrial outer membrane, mitochondrion					mitochondrial outer membrane, mitochondrion	caveola, mitochondrial outer membrane	mitochondrial outer membrane		mitochondrial outer membrane	mitochondrial outer membrane	caveola				ATP binding, glucose binding, macromolecular complex binding, protein homodimerization activity	ATPase activity, fructokinase activity, glucokinase activity, mannokinase activity, protein kinase activity							ATP binding, ATPase activity, fructokinase activity, glucokinase activity, glucose binding, macromolecular complex binding, mannokinase activity, protein homodimerization activity, protein kinase activity
Hexokinase-1 OS=Rattus norvegicus OX=10116 GN=Hk1 PE=1 SV=4	HXK1_RAT		cellular glucose homeostasis, negative regulation of apoptotic process, regulation of anion channel activity		carbohydrate phosphorylation, cellular glucose homeostasis, fructose 6-phosphate metabolic process, glucose 6-phosphate metabolic process, glycolytic process, peptidyl-serine phosphorylation, peptidyl-threonine phosphorylation, peptidyl-tyrosine phosphorylation, protein autophosphorylation, protein phosphorylation				innate immune response			carbohydrate phosphorylation, fructose 6-phosphate metabolic process, glucose 6-phosphate metabolic process, glycolytic process, mannose metabolic process, peptidyl-serine phosphorylation, peptidyl-threonine phosphorylation, peptidyl-tyrosine phosphorylation, protein autophosphorylation, protein phosphorylation						inflammatory response, innate immune response, response to brassinosteroid, response to hypoxia, response to ischemia, response to ketamine				cytosol, mitochondrial outer membrane, mitochondrion					mitochondrial outer membrane, mitochondrion	caveola, mitochondrial outer membrane	mitochondrial outer membrane		mitochondrial outer membrane	mitochondrial outer membrane	caveola				ATP binding, glucose binding, macromolecular complex binding, protein homodimerization activity	ATPase activity, fructokinase activity, glucokinase activity, mannokinase activity, protein kinase activity							ATP binding, ATPase activity, fructokinase activity, glucokinase activity, glucose binding, macromolecular complex binding, mannokinase activity, protein homodimerization activity, protein kinase activity
Uncharacterized protein OS=Rattus norvegicus OX=10116 PE=3 SV=2	M0R3X7_RAT
Apolipoprotein E OS=Rattus norvegicus OX=10116 GN=Apoe PE=1 SV=1	A0A0G2K151_RAT (+1)
Prefoldin subunit 2 OS=Rattus norvegicus OX=10116 GN=Pfdn2 PE=2 SV=1	PFD2_RAT		positive regulation of cytoskeleton organization		protein folding																	cytosol, mitochondrion					mitochondrion, nucleus		mitochondrion	nucleus							protein binding involved in protein folding, unfolded protein binding								protein binding involved in protein folding, unfolded protein binding
Peroxiredoxin-like 2A OS=Rattus norvegicus OX=10116 GN=Prxl2a PE=1 SV=1	PXL2A_RAT		regulation of osteoclast differentiation									oxidation-reduction process										cytoplasm				extracellular region									antioxidant activity										antioxidant activity
Heterogeneous nuclear ribonucleoprotein C, isoform CRA_a OS=Rattus norvegicus OX=10116 GN=Hnrnpc PE=1 SV=1	A0A0G2JXW4_RAT (+2)
Microtubule-associated protein RP/EB family member 1 OS=Rattus norvegicus OX=10116 GN=Mapre1 PE=1 SV=3	MARE1_RAT		negative regulation of microtubule polymerization, positive regulation of microtubule plus-end binding, positive regulation of microtubule polymerization		cell division, cell migration, microtubule bundle formation, microtubule polymerization, spindle assembly					cell migration, protein localization to microtubule, protein localization to microtubule plus-end	cell migration										Golgi apparatus	Golgi apparatus, cortical microtubule cytoskeleton, cytoplasmic microtubule, mitotic spindle astral microtubule end	centrosome, cortical microtubule cytoskeleton, cytoplasmic microtubule, microtubule organizing center, microtubule plus-end, mitotic spindle astral microtubule end, spindle midzone				Golgi apparatus, centrosome, cortical microtubule cytoskeleton, cytoplasmic microtubule, microtubule organizing center, microtubule plus-end, mitotic spindle astral microtubule end, spindle midzone	cell projection membrane				centrosome, cortical microtubule cytoskeleton, cytoplasmic microtubule, microtubule organizing center, microtubule plus-end, mitotic spindle astral microtubule end, spindle midzone	cell projection membrane				identical protein binding, microtubule binding, microtubule plus-end binding, protein kinase binding								identical protein binding, microtubule binding, microtubule plus-end binding, protein kinase binding
Lymphocyte cytosolic protein 1 OS=Rattus norvegicus OX=10116 GN=Lcp1 PE=1 SV=1	A0A0G2K014_RAT (+1)
RNA-binding motif protein, X chromosome OS=Rattus norvegicus OX=10116 GN=Rbmx PE=1 SV=1	RBMX_RAT (+1)		positive regulation of mRNA splicing, via spliceosome, positive regulation of transcription from RNA polymerase II promoter, positive regulation of transcription, DNA-templated, regulation of alternative mRNA splicing, via spliceosome		cellular response to interleukin-1, mRNA splice site selection, protein oligomerization, transcription from RNA polymerase II promoter							mRNA splice site selection, membrane protein ectodomain proteolysis, transcription from RNA polymerase II promoter						cellular response to interleukin-1								extracellular exosome	catalytic step 2 spliceosome, nuclear euchromatin, nucleus, supraspliceosomal complex			catalytic step 2 spliceosome, nuclear euchromatin, supraspliceosomal complex		catalytic step 2 spliceosome, nuclear euchromatin, supraspliceosomal complex					RNA polymerase II core promoter proximal region sequence-specific DNA binding, chromatin binding, identical protein binding, mRNA binding, protein domain specific binding, single-stranded RNA binding								RNA polymerase II core promoter proximal region sequence-specific DNA binding, chromatin binding, identical protein binding, mRNA binding, protein domain specific binding, single-stranded RNA binding
Hsp90 co-chaperone Cdc37 OS=Rattus norvegicus OX=10116 GN=Cdc37 PE=1 SV=2	CDC37_RAT		protein stabilization, regulation of cell cycle		protein folding																	cytoplasm						ruffle membrane					ruffle membrane				chaperone binding, heat shock protein binding, mitogen-activated protein kinase kinase kinase binding, protein C-terminus binding, protein kinase B binding, protein kinase binding, unfolded protein binding								chaperone binding, heat shock protein binding, mitogen-activated protein kinase kinase kinase binding, protein C-terminus binding, protein kinase B binding, protein kinase binding, unfolded protein binding
Elongation factor 1-delta OS=Rattus norvegicus OX=10116 GN=Eef1d PE=1 SV=2	EF1D_RAT				cellular response to ionizing radiation, translational elongation							translational elongation						cellular response to ionizing radiation				cytosol, endoplasmic reticulum, eukaryotic translation elongation factor 1 complex		endoplasmic reticulum			endoplasmic reticulum, fibrillar center			fibrillar center		fibrillar center					DNA binding, translation elongation factor activity								DNA binding, guanyl-nucleotide exchange factor activity, translation elongation factor activity
Ezrin OS=Rattus norvegicus OX=10116 GN=Ezr PE=1 SV=1	A0A0G2K890_RAT (+1)
Osteoclast-stimulating factor 1 OS=Rattus norvegicus OX=10116 GN=Ostf1 PE=1 SV=1	OSTF1_RAT																					cytoplasm															SH3 domain binding								SH3 domain binding
Transitional endoplasmic reticulum ATPase OS=Rattus norvegicus OX=10116 GN=Vcp PE=1 SV=3	TERA_RAT		activation of cysteine-type endopeptidase activity involved in apoptotic process, positive regulation of ATP biosynthetic process, positive regulation of Lys63-specific deubiquitinase activity, positive regulation of canonical Wnt signaling pathway, positive regulation of mitochondrial membrane potential, positive regulation of oxidative phosphorylation, positive regulation of proteasomal ubiquit…		ATP metabolic process, ER-associated misfolded protein catabolic process, ERAD pathway, NADH metabolic process, aggresome assembly, autophagosome maturation, cellular response to DNA damage stimulus, cellular response to arsenite ion, cellular response to heat, double-strand break repair, flavin adenine dinucleotide catabolic process, macroautophagy, mitotic spindle disassembly, proteasomal prote…		ER to Golgi vesicle-mediated transport, endosome to lysosome transport via multivesicular body sorting pathway, retrograde protein transport, ER to cytosol			ER to Golgi vesicle-mediated transport, endosome to lysosome transport via multivesicular body sorting pathway, retrograde protein transport, ER to cytosol		ATP metabolic process, ER-associated misfolded protein catabolic process, ERAD pathway, NADH metabolic process, autophagosome maturation, double-strand break repair, flavin adenine dinucleotide catabolic process, macroautophagy, proteasomal protein catabolic process, proteasome-mediated ubiquitin-dependent protein catabolic process, protein N-linked glycosylation via asparagine, protein ubiquitin…	viral genome replication					ER-associated misfolded protein catabolic process, cellular response to DNA damage stimulus, cellular response to arsenite ion, cellular response to heat, double-strand break repair, retrograde protein transport, ER to cytosol, translesion synthesis, ubiquitin-dependent ERAD pathway		viral genome replication		Derlin-1 retrotranslocation complex, VCP-NPL4-UFD1 AAA ATPase complex, VCP-NSFL1C complex, cytoplasmic stress granule, cytosol, endoplasmic reticulum, perinuclear region of cytoplasm		Derlin-1 retrotranslocation complex, VCP-NPL4-UFD1 AAA ATPase complex			Derlin-1 retrotranslocation complex, VCP-NPL4-UFD1 AAA ATPase complex, cytoplasmic stress granule, endoplasmic reticulum, intracellular membrane-bounded organelle, lipid particle, nucleoplasm, nucleus, site of double-strand break	Derlin-1 retrotranslocation complex, VCP-NPL4-UFD1 AAA ATPase complex		nucleoplasm		Derlin-1 retrotranslocation complex, VCP-NPL4-UFD1 AAA ATPase complex, nucleoplasm, site of double-strand break					ADP binding, ATP binding, BAT3 complex binding, K48-linked polyubiquitin binding, MHC class I protein binding, identical protein binding, lipid binding, macromolecular complex binding, polyubiquitin binding, protein domain specific binding, protein phosphatase binding, ubiquitin protein ligase binding, ubiquitin-specific protease binding	ATPase activity					deubiquitinase activator activity		ADP binding, ATP binding, ATPase activity, BAT3 complex binding, K48-linked polyubiquitin binding, MHC class I protein binding, deubiquitinase activator activity, identical protein binding, lipid binding, macromolecular complex binding, polyubiquitin binding, protein domain specific binding, protein phosphatase binding, ubiquitin protein ligase binding, ubiquitin-specific protease binding
Granulin, isoform CRA_c OS=Rattus norvegicus OX=10116 GN=Grn PE=4 SV=1	G3V8V1_RAT
Heat shock 70 kDa protein 4 OS=Rattus norvegicus OX=10116 GN=Hspa4 PE=1 SV=1	F1LRV4_RAT (+1)
Serine (Or cysteine) proteinase inhibitor, clade H, member 1, isoform CRA_b OS=Rattus norvegicus OX=10116 GN=Serpinh1 PE=1 SV=1	Q5RJR9_RAT
Alpha-2 antiplasmin OS=Rattus norvegicus OX=10116 GN=Serpinf1 PE=1 SV=1	Q80ZA3_RAT
Lambda-crystallin homolog OS=Rattus norvegicus OX=10116 GN=Cryl1 PE=1 SV=3	CRYL1_RAT				fatty acid metabolic process							fatty acid metabolic process										cytosol															NAD+ binding, protein homodimerization activity	3-hydroxyacyl-CoA dehydrogenase activity, L-gulonate 3-dehydrogenase activity							3-hydroxyacyl-CoA dehydrogenase activity, L-gulonate 3-dehydrogenase activity, NAD+ binding, protein homodimerization activity
Proteasome (Prosome, macropain) 26S subunit, non-ATPase, 6 OS=Rattus norvegicus OX=10116 GN=Psmd6 PE=1 SV=1	Q6PCT9_RAT
Nascent polypeptide-associated complex subunit alpha OS=Rattus norvegicus OX=10116 GN=Naca PE=1 SV=1	M0R9L0_RAT
Tissue-type transglutaminase OS=Rattus norvegicus OX=10116 GN=Tgm2 PE=1 SV=1	Q9WVJ6_RAT
Glutamate dehydrogenase 1, mitochondrial OS=Rattus norvegicus OX=10116 GN=Glud1 PE=1 SV=2	DHE3_RAT		positive regulation of insulin secretion		glutamate catabolic process, glutamine metabolic process, tricarboxylic acid metabolic process	cerebellum development						glutamate catabolic process, glutamine metabolic process, tricarboxylic acid metabolic process		cerebellum development, long-term memory				response to aluminum ion				mitochondrial matrix, mitochondrion					mitochondrial matrix, mitochondrion		mitochondrial matrix			mitochondrial matrix					ATP binding, GTP binding, enzyme binding	glutamate dehydrogenase (NAD+) activity, glutamate dehydrogenase [NAD(P)+] activity							ATP binding, GTP binding, enzyme binding, glutamate dehydrogenase (NAD+) activity, glutamate dehydrogenase [NAD(P)+] activity
UDP-glucose:glycoprotein glucosyltransferase 1 OS=Rattus norvegicus OX=10116 GN=Uggt1 PE=1 SV=2	UGGG1_RAT				'de novo' posttranslational protein folding, ER-associated misfolded protein catabolic process, protein N-linked glycosylation via asparagine, protein folding							ER-associated misfolded protein catabolic process, protein N-linked glycosylation via asparagine						ER-associated misfolded protein catabolic process				endoplasmic reticulum, endoplasmic reticulum lumen, endoplasmic reticulum-Golgi intermediate compartment		endoplasmic reticulum lumen			endoplasmic reticulum, endoplasmic reticulum lumen, endoplasmic reticulum-Golgi intermediate compartment					endoplasmic reticulum lumen					unfolded protein binding	UDP-glucose:glycoprotein glucosyltransferase activity							UDP-glucose:glycoprotein glucosyltransferase activity, unfolded protein binding
Chaperonin subunit 8 (Theta) (Predicted), isoform CRA_a OS=Rattus norvegicus OX=10116 GN=Cct8 PE=1 SV=1	D4ACB8_RAT
Endoplasmin OS=Rattus norvegicus OX=10116 GN=Hsp90b1 PE=1 SV=1	A0A0A0MY09_RAT (+1)
Caveolae-associated protein 3 OS=Rattus norvegicus OX=10116 GN=Cavin3 PE=1 SV=1	CAVN3_RAT		circadian regulation of gene expression, negative regulation of fermentation, negative regulation of protein kinase B signaling, positive regulation of ERK1 and ERK2 cascade, regulation of cell growth		cortical actin cytoskeleton organization									circadian regulation of gene expression					circadian regulation of gene expression			cytosol						caveola					caveola				protein kinase C binding								protein kinase C binding
Glucose-6-phosphate 1-dehydrogenase OS=Rattus norvegicus OX=10116 GN=G6pdx PE=1 SV=3	G6PD_RAT		erythrocyte maturation, negative regulation of cell growth involved in cardiac muscle cell development, negative regulation of protein glutathionylation, negative regulation of reactive oxygen species metabolic process, positive regulation of calcium ion transmembrane transport via high voltage-gated calcium channel, regulation of neuron apoptotic process		NADPH regeneration, cellular response to oxidative stress, erythrocyte maturation, glucose 6-phosphate metabolic process, glutathione metabolic process, pentose-phosphate shunt, pentose-phosphate shunt, oxidative branch, ribose phosphate biosynthetic process	erythrocyte maturation			erythrocyte maturation			NADPH regeneration, cholesterol biosynthetic process, glucose 6-phosphate metabolic process, glucose metabolic process, glutathione metabolic process, pentose biosynthetic process, pentose-phosphate shunt, pentose-phosphate shunt, oxidative branch, ribose phosphate biosynthetic process		erythrocyte maturation				cellular response to oxidative stress, response to ethanol, response to food, response to iron(III) ion, response to organic cyclic compound				cytosol					intracellular membrane-bounded organelle, nucleus	cytoplasmic side of plasma membrane		nucleus			cytoplasmic side of plasma membrane				NADP binding, glucose binding, protein homodimerization activity	glucose-6-phosphate dehydrogenase activity							NADP binding, glucose binding, glucose-6-phosphate dehydrogenase activity, protein homodimerization activity
Thymosin beta-4 OS=Rattus norvegicus OX=10116 GN=Tmsb4x PE=1 SV=2	TYB4_RAT		regulation of cell migration, sequestering of actin monomers		actin filament organization, osteoblast differentiation, sequestering of actin monomers	osteoblast differentiation				sequestering of actin monomers				osteoblast differentiation								cytoplasm	cytoskeleton				cytoskeleton										actin monomer binding								actin monomer binding
Calumenin OS=Rattus norvegicus OX=10116 GN=Calu PE=1 SV=1	G3V6S3_RAT
F-actin-capping protein subunit beta OS=Rattus norvegicus OX=10116 GN=Capzb PE=1 SV=1	CAPZB_RAT		barbed-end actin filament capping, negative regulation of filopodium assembly, regulation of cell morphogenesis, regulation of lamellipodium assembly		actin cytoskeleton organization, barbed-end actin filament capping, cell morphogenesis	cell morphogenesis																WASH complex, sarcomere	F-actin capping protein complex				F-actin capping protein complex, sarcomere					F-actin capping protein complex, sarcomere					actin binding, actin filament binding								actin binding, actin filament binding
Rab GDP dissociation inhibitor beta OS=Rattus norvegicus OX=10116 GN=Gdi2 PE=1 SV=2	GDIB_RAT		small GTPase mediated signal transduction		small GTPase mediated signal transduction		protein transport, vesicle-mediated transport			protein transport, vesicle-mediated transport								small GTPase mediated signal transduction			Golgi apparatus	Golgi apparatus, cytosol					Golgi apparatus	membrane									Rab GTPase binding						GTPase activator activity, Rab GDP-dissociation inhibitor activity		GTPase activator activity, Rab GDP-dissociation inhibitor activity, Rab GTPase binding
Cluster of Serine protease inhibitor A3N OS=Rattus norvegicus OX=10116 GN=LOC299282 PE=1 SV=1 (A0A0G2JXK5_RAT)	A0A0G2JXK5_RAT [3]
Serine protease inhibitor A3N OS=Rattus norvegicus OX=10116 GN=LOC299282 PE=1 SV=1	A0A0G2JXK5_RAT (+1)
Serine protease inhibitor A3N OS=Rattus norvegicus OX=10116 GN=LOC299282 PE=1 SV=1	A0A0G2K1T8_RAT
Synaptic vesicle membrane protein VAT-1 homolog OS=Rattus norvegicus OX=10116 GN=Vat1 PE=1 SV=1	VAT1_RAT		negative regulation of mitochondrial fusion																			mitochondrial outer membrane					mitochondrial outer membrane	mitochondrial outer membrane	mitochondrial outer membrane		mitochondrial outer membrane	mitochondrial outer membrane					zinc ion binding	oxidoreductase activity							oxidoreductase activity, zinc ion binding
Splicing factor proline and glutamine rich OS=Rattus norvegicus OX=10116 GN=Sfpq PE=1 SV=1	A0A0G2K8K0_RAT
Transaldolase OS=Rattus norvegicus OX=10116 GN=Taldo1 PE=1 SV=2	TALDO_RAT				fructose 6-phosphate metabolic process, pentose-phosphate shunt, pentose-phosphate shunt, non-oxidative branch							carbohydrate metabolic process, fructose 6-phosphate metabolic process, pentose-phosphate shunt, pentose-phosphate shunt, non-oxidative branch										cytosol					intracellular membrane-bounded organelle, nucleoplasm			nucleoplasm		nucleoplasm					monosaccharide binding	sedoheptulose-7-phosphate:D-glyceraldehyde-3-phosphate glyceronetransferase activity							monosaccharide binding, sedoheptulose-7-phosphate:D-glyceraldehyde-3-phosphate glyceronetransferase activity
Uncharacterized protein OS=Rattus norvegicus OX=10116 PE=3 SV=2	M0R566_RAT
Oligoribonuclease, mitochondrial OS=Rattus norvegicus OX=10116 GN=Rexo2 PE=2 SV=1	ORN_RAT																					mitochondrial intermembrane space, mitochondrial matrix, mitochondrion					mitochondrial intermembrane space, mitochondrial matrix, mitochondrion		mitochondrial intermembrane space, mitochondrial matrix, mitochondrion			mitochondrial intermembrane space, mitochondrial matrix					nucleic acid binding	3'-5'-exoribonuclease activity							3'-5'-exoribonuclease activity, nucleic acid binding
60S ribosomal protein L11 OS=Rattus norvegicus OX=10116 GN=Rpl11 PE=1 SV=2	RL11_RAT		negative regulation of proteasomal ubiquitin-dependent protein catabolic process, negative regulation of sequence-specific DNA binding transcription factor activity, positive regulation of signal transduction by p53 class mediator		ribosomal large subunit assembly, translation					protein localization to nucleus		translation										cytosolic large ribosomal subunit, cytosolic ribosome					cytosolic large ribosomal subunit, cytosolic ribosome, nucleolus, nucleoplasm			nucleolus, nucleoplasm		cytosolic large ribosomal subunit, nucleolus, nucleoplasm		cytosolic large ribosomal subunit, cytosolic ribosome			peroxisome proliferator activated receptor binding, rRNA binding								peroxisome proliferator activated receptor binding, rRNA binding, structural constituent of ribosome
ADP-ribosylation factor 4 OS=Rattus norvegicus OX=10116 GN=Arf4 PE=2 SV=2	ARF4_RAT		activation of phospholipase D activity, epidermal growth factor receptor signaling pathway, negative regulation of apoptotic process, positive regulation of transcription from RNA polymerase II promoter, regulation of reactive oxygen species metabolic process		cell migration, dendritic spine development, epidermal growth factor receptor signaling pathway, establishment or maintenance of epithelial cell apical/basal polarity, protein ADP-ribosylation	brain development, dendritic spine development	intracellular protein transport, retrograde vesicle-mediated transport, Golgi to ER			apical protein localization, cell migration, intracellular protein transport, protein localization to cilium, retrograde vesicle-mediated transport, Golgi to ER	cell migration	protein ADP-ribosylation		brain development, dendritic spine development, learning				epidermal growth factor receptor signaling pathway, response to axon injury			Golgi apparatus	Golgi apparatus, cytoplasm, cytosol					Golgi apparatus	ruffle membrane					ruffle membrane				GTP binding, epidermal growth factor receptor binding								GTP binding, epidermal growth factor receptor binding
Cluster of Moesin OS=Rattus norvegicus OX=10116 GN=Msn PE=1 SV=1 (A0A096MK30_RAT)	A0A096MK30_RAT [3]
Moesin OS=Rattus norvegicus OX=10116 GN=Msn PE=1 SV=1	A0A096MK30_RAT (+1)
Radixin OS=Rattus norvegicus OX=10116 GN=Rdx PE=1 SV=2	E9PT65_RAT
Elongation factor 1-alpha 1 OS=Rattus norvegicus OX=10116 GN=Eef1a1 PE=2 SV=1	EF1A1_RAT (+1)		negative regulation of reactive oxygen species biosynthetic process, positive regulation of cell death, positive regulation of neuron projection development, regulation of D-erythro-sphingosine kinase activity		cellular response to drug, cellular response to epidermal growth factor stimulus, cellular response to nerve growth factor stimulus, positive regulation of neuron projection development, protein homooligomerization, translation, translational elongation	aging, positive regulation of neuron projection development						translation, translational elongation		positive regulation of neuron projection development				cellular response to drug, cellular response to epidermal growth factor stimulus, cellular response to nerve growth factor stimulus				cytosol					nucleolus, nucleus	plasma membrane		nucleolus		nucleolus	plasma membrane				GTP binding, drug binding, mRNA binding, translation elongation factor activity	GTPase activity							GTP binding, GTPase activity, drug binding, mRNA binding, translation elongation factor activity
Acetyl-CoA acetyltransferase, mitochondrial OS=Rattus norvegicus OX=10116 GN=Acat1 PE=1 SV=1	THIL_RAT				acetyl-CoA biosynthetic process, acetyl-CoA catabolic process, coenzyme A biosynthetic process, fatty acid beta-oxidation, isoleucine catabolic process, ketone body catabolic process, propionyl-CoA biosynthetic process, protein homooligomerization	adipose tissue development, brain development, liver development, metanephric proximal convoluted tubule development						acetyl-CoA biosynthetic process, acetyl-CoA catabolic process, coenzyme A biosynthetic process, fatty acid beta-oxidation, isoleucine catabolic process, ketone body catabolic process, propionyl-CoA biosynthetic process		adipose tissue development, brain development, liver development, metanephric proximal convoluted tubule development				response to hormone, response to organic cyclic compound, response to starvation				mitochondrial matrix, mitochondrion					mitochondrial matrix, mitochondrion		mitochondrial matrix			mitochondrial matrix					coenzyme binding, enzyme binding, metal ion binding, protein homodimerization activity	acetyl-CoA C-acetyltransferase activity, acetyl-CoA C-acyltransferase activity							acetyl-CoA C-acetyltransferase activity, acetyl-CoA C-acyltransferase activity, coenzyme binding, enzyme binding, metal ion binding, protein homodimerization activity
ATP-dependent 6-phosphofructokinase, platelet type OS=Rattus norvegicus OX=10116 GN=Pfkp PE=1 SV=2	PFKAP_RAT				canonical glycolysis, fructose 1,6-bisphosphate metabolic process, fructose 6-phosphate metabolic process, glycolytic process, protein homotetramerization							canonical glycolysis, fructose 1,6-bisphosphate metabolic process, fructose 6-phosphate metabolic process, glucose catabolic process, glycolytic process										6-phosphofructokinase complex						membrane									AMP binding, ATP binding, fructose-6-phosphate binding, identical protein binding, metal ion binding, monosaccharide binding	6-phosphofructokinase activity							6-phosphofructokinase activity, AMP binding, ATP binding, fructose-6-phosphate binding, identical protein binding, metal ion binding, monosaccharide binding
6-phosphogluconate dehydrogenase, decarboxylating OS=Rattus norvegicus OX=10116 GN=Pgd PE=1 SV=1	6PGD_RAT				D-gluconate catabolic process, pentose-phosphate shunt, pentose-phosphate shunt, oxidative branch							D-gluconate catabolic process, carbohydrate metabolic process, pentose-phosphate shunt, pentose-phosphate shunt, oxidative branch										cytosol					intracellular membrane-bounded organelle										NADP binding, carbohydrate binding, carboxylic acid binding	phosphogluconate dehydrogenase (decarboxylating) activity							NADP binding, carbohydrate binding, carboxylic acid binding, phosphogluconate dehydrogenase (decarboxylating) activity
Macrophage-capping protein OS=Rattus norvegicus OX=10116 GN=Capg PE=1 SV=1	CAPG_RAT		barbed-end actin filament capping		barbed-end actin filament capping																	centriole, melanosome	centriole, mitotic spindle				centriole, melanosome, mitotic spindle, nucleolus, nucleoplasm			nucleolus, nucleoplasm		centriole, mitotic spindle, nucleolus, nucleoplasm					actin filament binding, protein domain specific binding								actin filament binding, protein domain specific binding
Chloride intracellular channel protein 1 OS=Rattus norvegicus OX=10116 GN=Clic1 PE=1 SV=1	CLIC1_RAT		positive regulation of osteoblast differentiation, regulation of cell cycle, regulation of ion transmembrane transport, regulation of mitochondrial membrane potential				chloride transport			chloride transport												mitochondrion, perinuclear region of cytoplasm				extracellular exosome	mitochondrion, nuclear envelope, nuclear membrane, nucleus	chloride channel complex, nuclear membrane, plasma membrane	mitochondrion	nuclear envelope, nuclear membrane	nuclear membrane	nuclear envelope, nuclear membrane	plasma membrane												voltage-gated chloride channel activity
Proteasome activator complex subunit 2 OS=Rattus norvegicus OX=10116 GN=Psme2 PE=2 SV=3	PSME2_RAT		positive regulation of endopeptidase activity, regulation of G1/S transition of mitotic cell cycle, regulation of proteasomal protein catabolic process																			cytoplasm					nucleoplasm			nucleoplasm		nucleoplasm					identical protein binding						endopeptidase activator activity		endopeptidase activator activity, identical protein binding
Cluster of Proteasome subunit alpha type OS=Rattus norvegicus OX=10116 GN=Psma7 PE=1 SV=1 (A0A0G2K0W9_RAT)	A0A0G2K0W9_RAT [2]
Proteasome subunit alpha type OS=Rattus norvegicus OX=10116 GN=Psma7 PE=1 SV=1	A0A0G2K0W9_RAT
Proteasome subunit alpha type OS=Rattus norvegicus OX=10116 GN=Psma8 PE=3 SV=2	F1M6I7_RAT
RCG43931 OS=Rattus norvegicus OX=10116 GN=Serpinb9 PE=1 SV=1	Q6AYF8_RAT
WD repeat-containing protein 1 OS=Rattus norvegicus OX=10116 GN=Wdr1 PE=1 SV=3	WDR1_RAT		positive regulation of actin filament depolymerization, regulation of cell shape, regulation of oligodendrocyte differentiation, regulation of ventricular cardiac muscle cell membrane repolarization		actin filament fragmentation, apical junction assembly, cortical cytoskeleton organization, establishment of planar polarity of follicular epithelium, maintenance of epithelial cell apical/basal polarity, neutrophil migration, platelet formation, positive regulation of actin filament depolymerization, regulation of oligodendrocyte differentiation, sarcomere organization	establishment of planar polarity of follicular epithelium, platelet formation, regulation of oligodendrocyte differentiation, sarcomere organization			neutrophil mediated immunity, neutrophil migration, platelet formation	neutrophil migration	neutrophil migration			platelet formation, regulation of oligodendrocyte differentiation								cortical actin cytoskeleton	actomyosin, actin portion, cortical actin cytoskeleton, podosome				actomyosin, actin portion, cortical actin cytoskeleton, podosome	plasma membrane				actomyosin, actin portion, cortical actin cytoskeleton, podosome	plasma membrane				actin filament binding								actin filament binding
Protein disulfide-isomerase A6 OS=Rattus norvegicus OX=10116 GN=Pdia6 PE=1 SV=1	A0A0G2JSZ5_RAT (+1)
60S ribosomal protein L10a OS=Rattus norvegicus OX=10116 GN=Rpl10a PE=1 SV=2	RL10A_RAT				cytoplasmic translation, maturation of LSU-rRNA							cytoplasmic translation, maturation of LSU-rRNA						response to ethanol				cytosolic large ribosomal subunit, polysomal ribosome					cytosolic large ribosomal subunit, polysomal ribosome					cytosolic large ribosomal subunit		cytosolic large ribosomal subunit, polysomal ribosome			RNA binding								RNA binding, structural constituent of ribosome
GTP-binding nuclear protein Ran OS=Rattus norvegicus OX=10116 GN=Ran PE=1 SV=3	RAN_RAT		regulation of protein binding		GTP metabolic process, cell division, cellular response to mineralocorticoid stimulus, microtubule cytoskeleton organization, mitotic sister chromatid segregation, spermatid development	hippocampus development, spermatid development	nucleocytoplasmic transport, protein export from nucleus, protein import into nucleus, snRNA import into nucleus			nucleocytoplasmic transport, protein export from nucleus, protein import into nucleus, snRNA import into nucleus		GTP metabolic process	spermatid development	hippocampus development, spermatid development		spermatid development	spermatid development	cellular response to mineralocorticoid stimulus, response to organic cyclic compound				cytosol, melanosome	manchette				male germ cell nucleus, manchette, melanosome, nuclear pore			male germ cell nucleus, nuclear pore		manchette, nuclear pore					GDP binding, GTP binding, dynein intermediate chain binding, importin-alpha family protein binding, macromolecular complex binding, magnesium ion binding, protein domain specific binding	GTPase activity							GDP binding, GTP binding, GTPase activity, dynein intermediate chain binding, importin-alpha family protein binding, macromolecular complex binding, magnesium ion binding, protein domain specific binding
Cluster of Myosin-11 OS=Rattus norvegicus OX=10116 GN=Myh11 PE=1 SV=2 (E9PTU4_RAT)	E9PTU4_RAT [2]																					melanosome, muscle myosin complex, myofibril	muscle myosin complex, myosin filament				melanosome, muscle myosin complex, myofibril, myosin filament					muscle myosin complex, myosin filament					ATP binding, actin binding, calmodulin binding	motor activity							ATP binding, actin binding, calmodulin binding, motor activity, structural constituent of muscle		motor activity
Myosin-11 (Fragments) OS=Rattus norvegicus OX=10116 GN=Myh11 PE=1 SV=3	MYH11_RAT																					melanosome, muscle myosin complex, myofibril	muscle myosin complex, myosin filament				melanosome, muscle myosin complex, myofibril, myosin filament					muscle myosin complex, myosin filament					ATP binding, actin binding, calmodulin binding	motor activity							ATP binding, actin binding, calmodulin binding, motor activity, structural constituent of muscle		motor activity
Myosin-11 OS=Rattus norvegicus OX=10116 GN=Myh11 PE=1 SV=2	E9PTU4_RAT
Calponin-1 OS=Rattus norvegicus OX=10116 GN=Cnn1 PE=1 SV=1	CNN1_RAT		negative regulation of vascular smooth muscle cell proliferation		actomyosin structure organization																		cytoskeleton				cytoskeleton										actin binding, calmodulin binding								actin binding, calmodulin binding
Translationally-controlled tumor protein OS=Rattus norvegicus OX=10116 GN=Tpt1 PE=1 SV=1	TCTP_RAT		negative regulation of ectoderm development			stem cell population maintenance							spermatogenesis	spermatogenesis, stem cell population maintenance		spermatogenesis	spermatogenesis					cytoplasm	spindle pole				nucleoplasm, spindle pole			nucleoplasm		nucleoplasm, spindle pole					calcium ion binding, transcription factor binding								calcium ion binding, transcription factor binding
Cluster of RNA binding motif protein 3, isoform CRA_a OS=Rattus norvegicus OX=10116 GN=Rbm3 PE=1 SV=1 (G3V6P6_RAT)	G3V6P6_RAT [2]
RNA binding motif protein 3, isoform CRA_a OS=Rattus norvegicus OX=10116 GN=Rbm3 PE=1 SV=1	G3V6P6_RAT
RNA-binding protein 3 OS=Rattus norvegicus OX=10116 GN=Rbm3 PE=1 SV=1	Q5PPI5_RAT
Cluster of Ubiquilin 2 OS=Rattus norvegicus OX=10116 GN=Ubqln2 PE=1 SV=1 (D4AA63_RAT)	D4AA63_RAT [2]
Ubiquilin 2 OS=Rattus norvegicus OX=10116 GN=Ubqln2 PE=1 SV=1	D4AA63_RAT
Ubiquilin 1, isoform CRA_a OS=Rattus norvegicus OX=10116 GN=Ubqln1 PE=1 SV=1	A0A140TAI1_RAT
Nucleolin OS=Rattus norvegicus OX=10116 GN=Ncl PE=1 SV=3	NUCL_RAT (+1)		negative regulation of apoptotic process, negative regulation of translation, positive regulation of interleukin-6 secretion, positive regulation of mRNA splicing, via spliceosome, positive regulation of transcription from RNA polymerase II promoter, positive regulation of transcription of nuclear large rRNA transcript from RNA polymerase I promoter, positive regulation of tumor necrosis factor p…		cellular response to epidermal growth factor stimulus, cellular response to leukemia inhibitory factor, cellular response to lipopolysaccharide	angiogenesis, liver regeneration	endocytosis			endocytosis			cellular response to lipopolysaccharide, spermatogenesis	angiogenesis, liver regeneration, spermatogenesis		spermatogenesis	spermatogenesis	cellular response to epidermal growth factor stimulus, cellular response to leukemia inhibitory factor, cellular response to lipopolysaccharide				cell cortex					dense fibrillar component, fibrillar center, nucleolus, nucleoplasm, nucleus, spliceosomal complex			dense fibrillar component, fibrillar center, nucleolus, nucleoplasm, spliceosomal complex		dense fibrillar component, fibrillar center, nucleolus, nucleoplasm, spliceosomal complex					DNA topoisomerase binding, ErbB-4 class receptor binding, calcium ion binding, histone binding, identical protein binding, laminin binding, mRNA 5'-UTR binding, protein C-terminus binding, rRNA primary transcript binding, selenocysteine insertion sequence binding, sequence-specific DNA binding, single-stranded DNA binding, telomeric DNA binding								DNA topoisomerase binding, ErbB-4 class receptor binding, calcium ion binding, histone binding, identical protein binding, laminin binding, mRNA 5'-UTR binding, protein C-terminus binding, rRNA primary transcript binding, selenocysteine insertion sequence binding, sequence-specific DNA binding, single-stranded DNA binding, telomeric DNA binding
Cluster of Serotransferrin OS=Rattus norvegicus OX=10116 GN=Tf PE=1 SV=3 (TRFE_RAT)	TRFE_RAT [2]		cellular iron ion homeostasis, positive regulation of myelination, positive regulation of oligodendrocyte progenitor proliferation		apoptotic process, cellular iron ion homeostasis, cellular response to cAMP, cellular response to follicle-stimulating hormone stimulus, positive regulation of oligodendrocyte progenitor proliferation	positive regulation of oligodendrocyte progenitor proliferation	iron ion transport			iron ion transport				positive regulation of oligodendrocyte progenitor proliferation				acute-phase response, cellular response to cAMP, cellular response to follicle-stimulating hormone stimulus, response to hypoxia, response to lead ion, response to organic cyclic compound								basement membrane, extracellular space											ferric iron binding								ferric iron binding, ferric iron transmembrane transporter activity
Serotransferrin OS=Rattus norvegicus OX=10116 GN=Tf PE=1 SV=3	TRFE_RAT		cellular iron ion homeostasis, positive regulation of myelination, positive regulation of oligodendrocyte progenitor proliferation		apoptotic process, cellular iron ion homeostasis, cellular response to cAMP, cellular response to follicle-stimulating hormone stimulus, positive regulation of oligodendrocyte progenitor proliferation	positive regulation of oligodendrocyte progenitor proliferation	iron ion transport			iron ion transport				positive regulation of oligodendrocyte progenitor proliferation				acute-phase response, cellular response to cAMP, cellular response to follicle-stimulating hormone stimulus, response to hypoxia, response to lead ion, response to organic cyclic compound								basement membrane, extracellular space											ferric iron binding								ferric iron binding, ferric iron transmembrane transporter activity
Serotransferrin OS=Rattus norvegicus OX=10116 GN=Tf PE=1 SV=1	A0A0G2QC06_RAT
Biglycan OS=Rattus norvegicus OX=10116 GN=Bgn PE=1 SV=1	PGS1_RAT				peptide cross-linking via chondroitin 4-sulfate glycosaminoglycan	bone development						peptide cross-linking via chondroitin 4-sulfate glycosaminoglycan		blood vessel remodeling, bone development								transport vesicle				extracellular matrix	transport vesicle	sarcolemma					sarcolemma				extracellular matrix binding, glycosaminoglycan binding								extracellular matrix binding, glycosaminoglycan binding
SPARC OS=Rattus norvegicus OX=10116 GN=Sparc PE=1 SV=4	SPRC_RAT		negative regulation of angiogenesis, negative regulation of endothelial cell proliferation, positive regulation of endothelial cell migration, regulation of cell morphogenesis, regulation of synapse organization		cellular response to growth factor stimulus	bone development, heart development, inner ear development, lung development							response to lipopolysaccharide	bone development, heart development, inner ear development, lung development, ossification	pigmentation			cellular response to growth factor stimulus, response to L-ascorbic acid, response to cAMP, response to cadmium ion, response to calcium ion, response to cytokine, response to ethanol, response to glucocorticoid, response to gravity, response to lead ion, response to lipopolysaccharide, response to peptide hormone, wound healing				platelet alpha granule membrane				basement membrane, extracellular space	nuclear matrix, nucleus, platelet alpha granule membrane	platelet alpha granule membrane		nuclear matrix, nucleus	platelet alpha granule membrane	nuclear matrix, platelet alpha granule membrane					calcium ion binding, collagen binding, extracellular matrix binding								calcium ion binding, collagen binding, extracellular matrix binding
Endoplasmic reticulum resident protein 29 OS=Rattus norvegicus OX=10116 GN=Erp29 PE=1 SV=2	ERP29_RAT		activation of MAPK activity, negative regulation of gene expression, negative regulation of protein secretion, positive regulation of gene expression, positive regulation of protein phosphorylation, regulation of endoplasmic reticulum stress-induced intrinsic apoptotic signaling pathway		protein folding, protein secretion, response to endoplasmic reticulum stress		intracellular protein transport, protein secretion			intracellular protein transport, protein secretion								response to endoplasmic reticulum stress				endoplasmic reticulum lumen, melanosome, smooth endoplasmic reticulum, transport vesicle		endoplasmic reticulum lumen, smooth endoplasmic reticulum			endoplasmic reticulum lumen, melanosome, smooth endoplasmic reticulum, transport vesicle					endoplasmic reticulum lumen					chaperone binding, protein homodimerization activity								chaperone binding, protein homodimerization activity
T-complex protein 1 subunit beta OS=Rattus norvegicus OX=10116 GN=Cct2 PE=1 SV=3	TCPB_RAT		positive regulation of establishment of protein localization to telomere, positive regulation of telomerase RNA localization to Cajal body, positive regulation of telomerase activity, positive regulation of telomere maintenance via telomerase, protein stabilization		binding of sperm to zona pellucida, chaperone mediated protein folding independent of cofactor, chaperone-mediated protein complex assembly		toxin transport			scaRNA localization to Cajal body, toxin transport			binding of sperm to zona pellucida			binding of sperm to zona pellucida	binding of sperm to zona pellucida					chaperonin-containing T-complex	microtubule				microtubule					microtubule					ATP binding, protein binding involved in protein folding, ubiquitin protein ligase binding, unfolded protein binding								ATP binding, protein binding involved in protein folding, ubiquitin protein ligase binding, unfolded protein binding
Heterogeneous nuclear ribonucleoprotein U OS=Rattus norvegicus OX=10116 GN=Hnrnpu PE=1 SV=1	A0A0G2JZ52_RAT (+1)
Cluster of Programmed cell death 5 OS=Rattus norvegicus OX=10116 GN=Pdcd5 PE=1 SV=1 (D4ADF5_RAT)	D4ADF5_RAT [2]
Programmed cell death 5 OS=Rattus norvegicus OX=10116 GN=Pdcd5 PE=1 SV=1	D4ADF5_RAT
RGD1564319 protein OS=Rattus norvegicus OX=10116 GN=RGD1564319 PE=2 SV=1	B1H286_RAT
Phosphatidylinositol binding clathrin assembly protein, isoform CRA_a OS=Rattus norvegicus OX=10116 GN=Picalm PE=1 SV=1	A0A0G2JTT2_RAT (+5)
Proteasome (Prosome, macropain) activator subunit 1 OS=Rattus norvegicus OX=10116 GN=Psme1 PE=1 SV=1	Q6P9V7_RAT
N(G),N(G)-dimethylarginine dimethylaminohydrolase 2 OS=Rattus norvegicus OX=10116 GN=Ddah2 PE=1 SV=1	DDAH2_RAT		positive regulation of nitric oxide biosynthetic process		arginine catabolic process, citrulline metabolic process							arginine catabolic process, citrulline metabolic process										cytosol, mitochondrion	microtubule organizing center				microtubule organizing center, mitochondrion		mitochondrion			microtubule organizing center					amino acid binding	dimethylargininase activity							amino acid binding, dimethylargininase activity
Major vault protein OS=Rattus norvegicus OX=10116 GN=Mvp PE=1 SV=1	A0A140TAE0_RAT (+1)
Filamin A OS=Rattus norvegicus OX=10116 GN=Flna PE=1 SV=1	C0JPT7_RAT
Ribonuclease inhibitor OS=Rattus norvegicus OX=10116 GN=Rnh1 PE=1 SV=1	A0A0G2K9E0_RAT (+1)
RCG34610, isoform CRA_c OS=Rattus norvegicus OX=10116 GN=Srsf1 PE=1 SV=1	D4A9L2_RAT
Serine (Or cysteine) peptidase inhibitor, clade B, member 6a OS=Rattus norvegicus OX=10116 GN=Serpinb6a PE=1 SV=1	Q6P9U0_RAT
ATP synthase subunit alpha, mitochondrial OS=Rattus norvegicus OX=10116 GN=Atp5f1a PE=1 SV=2	ATPA_RAT		negative regulation of endothelial cell proliferation, positive regulation of blood vessel endothelial cell migration		ATP biosynthetic process, ATP metabolic process, ATP synthesis coupled proton transport, apoptotic process, cellular response to dexamethasone stimulus, cellular response to nitric oxide	aging	ATP synthesis coupled proton transport			ATP synthesis coupled proton transport		ATP biosynthetic process, ATP metabolic process, ATP synthesis coupled proton transport, lipid metabolic process						cellular response to dexamethasone stimulus, cellular response to nitric oxide, response to ethanol, response to muscle activity				mitochondrial inner membrane, mitochondrial proton-transporting ATP synthase complex, mitochondrial proton-transporting ATP synthase complex, catalytic core F(1), mitochondrion					mitochondrial inner membrane, mitochondrial proton-transporting ATP synthase complex, mitochondrial proton-transporting ATP synthase complex, catalytic core F(1), mitochondrion, nucleus	membrane raft, mitochondrial inner membrane, mitochondrial proton-transporting ATP synthase complex, mitochondrial proton-transporting ATP synthase complex, catalytic core F(1), plasma membrane, proton-transporting ATP synthase complex	mitochondrial inner membrane, mitochondrial proton-transporting ATP synthase complex, mitochondrial proton-transporting ATP synthase complex, catalytic core F(1)	nucleus	mitochondrial inner membrane, mitochondrial proton-transporting ATP synthase complex, mitochondrial proton-transporting ATP synthase complex, catalytic core F(1)	mitochondrial inner membrane, mitochondrial proton-transporting ATP synthase complex, mitochondrial proton-transporting ATP synthase complex, catalytic core F(1)	plasma membrane				ADP binding, ATP binding, MHC class I protein binding, angiostatin binding, protease binding	proton-transporting ATP synthase activity, rotational mechanism							ADP binding, ATP binding, MHC class I protein binding, angiostatin binding, protease binding, proton-transporting ATP synthase activity, rotational mechanism
Adenylyl cyclase-associated protein 1 OS=Rattus norvegicus OX=10116 GN=Cap1 PE=1 SV=3	CAP1_RAT				actin polymerization or depolymerization, ameboidal-type cell migration, cell morphogenesis, establishment or maintenance of cell polarity	cell morphogenesis	receptor-mediated endocytosis			ameboidal-type cell migration, receptor-mediated endocytosis	ameboidal-type cell migration											cortical actin cytoskeleton	cortical actin cytoskeleton				cortical actin cytoskeleton	plasma membrane				cortical actin cytoskeleton	plasma membrane				actin binding, adenylate cyclase binding								actin binding, adenylate cyclase binding
Ribosome-binding protein 1 OS=Rattus norvegicus OX=10116 GN=Rrbp1 PE=1 SV=3	F1M853_RAT
Kininogen-1 OS=Rattus norvegicus OX=10116 GN=Kng1 PE=2 SV=1	KNG1_RAT		Factor XII activation, blood coagulation, negative regulation of MAP kinase activity, negative regulation of T cell proliferation, negative regulation of blood coagulation, negative regulation of endopeptidase activity, negative regulation of lymphocyte proliferation, negative regulation of proteolysis, positive regulation of MAPK cascade, positive regulation of cytosolic calcium ion concentratio…		positive regulation of cytosolic calcium ion concentration							Factor XII activation		blood coagulation, vasodilation				Factor XII activation, blood coagulation, inflammatory response								extracellular region, extracellular space	intracellular membrane-bounded organelle										protease binding						cysteine-type endopeptidase inhibitor activity		cysteine-type endopeptidase inhibitor activity, protease binding
Dynactin subunit 2 OS=Rattus norvegicus OX=10116 GN=Dctn2 PE=1 SV=1	A0A0G2JUC7_RAT (+1)
Alpha-N-acetylgalactosaminidase OS=Rattus norvegicus OX=10116 GN=Naga PE=2 SV=1	NAGAB_RAT				glycolipid catabolic process, glycosylceramide catabolic process							carbohydrate catabolic process, glycolipid catabolic process, glycoside catabolic process, glycosylceramide catabolic process, oligosaccharide metabolic process										lysosome					lysosome										protein homodimerization activity	alpha-N-acetylgalactosaminidase activity, alpha-galactosidase activity							alpha-N-acetylgalactosaminidase activity, alpha-galactosidase activity, protein homodimerization activity
Dermatopontin OS=Rattus norvegicus OX=10116 GN=Dpt PE=1 SV=1	B2RZ77_RAT
60S ribosomal protein L22 OS=Rattus norvegicus OX=10116 GN=LOC100360057 PE=1 SV=1	Q6PDV8_RAT (+1)
Proteasome subunit beta type-1 OS=Rattus norvegicus OX=10116 GN=Psmb1 PE=1 SV=3	PSB1_RAT (+1)				proteasomal ubiquitin-independent protein catabolic process, proteasome-mediated ubiquitin-dependent protein catabolic process							proteasomal ubiquitin-independent protein catabolic process, proteasome-mediated ubiquitin-dependent protein catabolic process										cytoplasm					nucleus			nucleus								endopeptidase activity, threonine-type endopeptidase activity							endopeptidase activity, threonine-type endopeptidase activity
Cluster of L-lactate dehydrogenase A chain OS=Rattus norvegicus OX=10116 GN=Ldha PE=1 SV=1 (LDHA_RAT)	LDHA_RAT [3]		positive regulation of apoptotic process		ATP biosynthetic process, NAD metabolic process, flagellated sperm motility, lactate biosynthetic process from pyruvate, lactate metabolic process, lactate oxidation, pyruvate metabolic process	post-embryonic animal organ development				flagellated sperm motility	flagellated sperm motility	ATP biosynthetic process, NAD metabolic process, carbohydrate metabolic process, lactate biosynthetic process from pyruvate, lactate metabolic process, lactate oxidation, pyruvate metabolic process		post-embryonic animal organ development				response to cAMP, response to drug, response to estrogen, response to glucose, response to hydrogen peroxide, response to hypoxia, response to nutrient, response to organic cyclic compound				cytoplasm															NAD binding, identical protein binding, kinase binding	L-lactate dehydrogenase activity							L-lactate dehydrogenase activity, NAD binding, identical protein binding, kinase binding
L-lactate dehydrogenase A chain OS=Rattus norvegicus OX=10116 GN=Ldha PE=1 SV=1	LDHA_RAT		positive regulation of apoptotic process		NAD metabolic process, lactate metabolic process	post-embryonic animal organ development						NAD metabolic process, carbohydrate metabolic process, lactate metabolic process		post-embryonic animal organ development				response to cAMP, response to drug, response to estrogen, response to glucose, response to hydrogen peroxide, response to hypoxia, response to nutrient, response to organic cyclic compound				cytoplasm															NAD binding, identical protein binding, kinase binding	L-lactate dehydrogenase activity							L-lactate dehydrogenase activity, NAD binding, identical protein binding, kinase binding
L-lactate dehydrogenase C chain OS=Rattus norvegicus OX=10116 GN=Ldhc PE=1 SV=3	LDHC_RAT (+1)				ATP biosynthetic process, flagellated sperm motility, lactate biosynthetic process from pyruvate, lactate oxidation, pyruvate metabolic process					flagellated sperm motility	flagellated sperm motility	ATP biosynthetic process, carbohydrate metabolic process, lactate biosynthetic process from pyruvate, lactate oxidation, pyruvate metabolic process										cytoplasm																L-lactate dehydrogenase activity							L-lactate dehydrogenase activity
Annexin A1 OS=Rattus norvegicus OX=10116 GN=Anxa1 PE=1 SV=2	ANXA1_RAT		G-protein coupled receptor signaling pathway, coupled to cyclic nucleotide second messenger, cell surface receptor signaling pathway, insulin secretion, negative regulation of T-helper 2 cell differentiation, negative regulation of exocytosis, negative regulation of interleukin-8 secretion, negative regulation of phospholipase A2 activity, negative regulation of protein secretion, neutrophil clea…		DNA duplex unwinding, G-protein coupled receptor signaling pathway, coupled to cyclic nucleotide second messenger, actin cytoskeleton reorganization, alpha-beta T cell differentiation, cell surface receptor signaling pathway, cellular response to glucocorticoid stimulus, cellular response to hydrogen peroxide, cellular response to vascular endothelial growth factor stimulus, gliogenesis, granuloc…	alpha-beta T cell differentiation, endocrine pancreas development, gliogenesis, hepatocyte differentiation, keratinocyte differentiation, myoblast migration involved in skeletal muscle regeneration, prostate gland development	arachidonic acid secretion, insulin secretion, phagocytosis, prolactin secretion	myoblast migration involved in skeletal muscle regeneration	adaptive immune response, alpha-beta T cell differentiation, granulocyte chemotaxis, innate immune response, monocyte chemotaxis, neutrophil clearance	arachidonic acid secretion, granulocyte chemotaxis, insulin secretion, monocyte chemotaxis, myoblast migration involved in skeletal muscle regeneration, phagocytosis, prolactin secretion	granulocyte chemotaxis, monocyte chemotaxis, myoblast migration involved in skeletal muscle regeneration	peptide cross-linking		alpha-beta T cell differentiation, endocrine pancreas development, estrous cycle, gliogenesis, hepatocyte differentiation, keratinocyte differentiation, neutrophil clearance, prostate gland development		estrous cycle, prostate gland development	estrous cycle, prostate gland development	G-protein coupled receptor signaling pathway, coupled to cyclic nucleotide second messenger, adaptive immune response, cell surface receptor signaling pathway, cellular response to glucocorticoid stimulus, cellular response to hydrogen peroxide, cellular response to vascular endothelial growth factor stimulus, granulocyte chemotaxis, inflammatory response, innate immune response, monocyte chemota…	estrous cycle			cytoplasmic vesicle membrane, cytosol, early endosome membrane, extrinsic component of endosome membrane, mast cell granule, mitochondrial membrane	actin filament		early endosome membrane, extrinsic component of endosome membrane	extracellular exosome, extracellular space	actin filament, cytoplasmic vesicle membrane, early endosome membrane, extrinsic component of endosome membrane, mast cell granule, mitochondrial membrane, nucleoplasm, nucleus	apical plasma membrane, basolateral plasma membrane, cornified envelope, cytoplasmic vesicle membrane, early endosome membrane, extrinsic component of endosome membrane, extrinsic component of external side of plasma membrane, lateral plasma membrane, mitochondrial membrane, phagocytic cup, plasma membrane, sarcolemma, synaptic membrane	mitochondrial membrane	nucleoplasm	cytoplasmic vesicle membrane, early endosome membrane, extrinsic component of endosome membrane, mitochondrial membrane	actin filament, cytoplasmic vesicle membrane, early endosome membrane, extrinsic component of endosome membrane, mitochondrial membrane, nucleoplasm	apical plasma membrane, basolateral plasma membrane, cornified envelope, extrinsic component of external side of plasma membrane, lateral plasma membrane, phagocytic cup, plasma membrane, sarcolemma, synaptic membrane				DNA/DNA annealing activity, calcium ion binding, calcium-dependent phospholipid binding, calcium-dependent protein binding, protein homodimerization activity, single-stranded DNA binding						phospholipase A2 inhibitor activity		DNA/DNA annealing activity, calcium ion binding, calcium-dependent phospholipid binding, calcium-dependent protein binding, phospholipase A2 inhibitor activity, protein homodimerization activity, single-stranded DNA binding
Cluster of Pyruvate kinase PKM OS=Rattus norvegicus OX=10116 GN=Pkm PE=1 SV=3 (KPYM_RAT)	KPYM_RAT [3]		positive regulation of sprouting angiogenesis		ATP biosynthetic process, cellular response to insulin stimulus, glycolytic process, programmed cell death, protein homotetramerization, pyruvate biosynthetic process	animal organ regeneration, liver development, skeletal muscle tissue regeneration		skeletal muscle tissue regeneration				ATP biosynthetic process, glucose metabolic process, glycolytic process, pyruvate biosynthetic process		animal organ regeneration, liver development				cellular response to insulin stimulus, response to gravity, response to hypoxia, response to muscle inactivity, response to nutrient, response to organic substance, skeletal muscle tissue regeneration				cytoplasm, cytosol					nucleus			nucleus							ADP binding, ATP binding, identical protein binding, magnesium ion binding, potassium ion binding, thyroid hormone binding	kinase activity, pyruvate kinase activity							ADP binding, ATP binding, identical protein binding, kinase activity, magnesium ion binding, potassium ion binding, pyruvate kinase activity, thyroid hormone binding
Pyruvate kinase PKM OS=Rattus norvegicus OX=10116 GN=Pkm PE=1 SV=3	KPYM_RAT		positive regulation of sprouting angiogenesis		ATP biosynthetic process, cellular response to insulin stimulus, glycolytic process, programmed cell death, protein homotetramerization, pyruvate biosynthetic process	animal organ regeneration, liver development, skeletal muscle tissue regeneration		skeletal muscle tissue regeneration				ATP biosynthetic process, glucose metabolic process, glycolytic process, pyruvate biosynthetic process		animal organ regeneration, liver development				cellular response to insulin stimulus, response to gravity, response to hypoxia, response to muscle inactivity, response to nutrient, response to organic substance, skeletal muscle tissue regeneration				cytoplasm, cytosol					nucleus			nucleus							ADP binding, ATP binding, identical protein binding, magnesium ion binding, potassium ion binding, thyroid hormone binding	kinase activity, pyruvate kinase activity							ADP binding, ATP binding, identical protein binding, kinase activity, magnesium ion binding, potassium ion binding, pyruvate kinase activity, thyroid hormone binding
Pyruvate kinase OS=Rattus norvegicus OX=10116 GN=Pklr PE=1 SV=1	A0A0H2UI07_RAT (+1)
Clathrin heavy chain 1 OS=Rattus norvegicus OX=10116 GN=Cltc PE=1 SV=3	CLH1_RAT (+1)		negative regulation of hyaluronan biosynthetic process		Golgi organization, autophagy, clathrin coat assembly, mitotic cell cycle		intracellular protein transport, receptor-mediated endocytosis, synaptic vesicle endocytosis			intracellular protein transport, receptor-mediated endocytosis, synaptic vesicle endocytosis		autophagy									clathrin coat of trans-Golgi network vesicle	clathrin coat of coated pit, clathrin coat of trans-Golgi network vesicle, clathrin complex, clathrin-coated endocytic vesicle, clathrin-coated endocytic vesicle membrane, extrinsic component of synaptic vesicle membrane, melanosome	spindle				clathrin coat of trans-Golgi network vesicle, clathrin-coated endocytic vesicle, clathrin-coated endocytic vesicle membrane, extrinsic component of synaptic vesicle membrane, melanosome, spindle	T-tubule, clathrin coat of coated pit, clathrin coat of trans-Golgi network vesicle, clathrin complex, clathrin-coated endocytic vesicle membrane, extrinsic component of synaptic vesicle membrane, sarcolemma			clathrin coat of trans-Golgi network vesicle, clathrin-coated endocytic vesicle membrane, extrinsic component of synaptic vesicle membrane	clathrin coat of trans-Golgi network vesicle, clathrin-coated endocytic vesicle membrane, extrinsic component of synaptic vesicle membrane, spindle	T-tubule, clathrin coat of coated pit, sarcolemma				ankyrin binding, clathrin light chain binding, heat shock protein binding, peptide binding, protein C-terminus binding								ankyrin binding, clathrin light chain binding, heat shock protein binding, peptide binding, protein C-terminus binding, structural molecule activity
AHNAK nucleoprotein OS=Rattus norvegicus OX=10116 GN=Ahnak PE=1 SV=1	A0A0G2JUA5_RAT
Cluster of Ubiquitin-like modifier-activating enzyme 1 OS=Rattus norvegicus OX=10116 GN=Uba1 PE=1 SV=1 (UBA1_RAT)	UBA1_RAT [2]				cellular response to DNA damage stimulus, protein modification by small protein conjugation, protein ubiquitination, ubiquitin-dependent protein catabolic process							protein modification by small protein conjugation, protein ubiquitination, ubiquitin-dependent protein catabolic process						cellular response to DNA damage stimulus				cytosol, endosome membrane, lysosomal membrane, mitochondrion, rough endoplasmic reticulum membrane		rough endoplasmic reticulum membrane	endosome membrane		endosome membrane, heterochromatin, lysosomal membrane, mitochondrion, nucleoplasm, nucleus, rough endoplasmic reticulum membrane	endosome membrane, lysosomal membrane, rough endoplasmic reticulum membrane	mitochondrion	nucleoplasm	endosome membrane, lysosomal membrane, rough endoplasmic reticulum membrane	endosome membrane, heterochromatin, lysosomal membrane, nucleoplasm, rough endoplasmic reticulum membrane					ATP binding	ubiquitin activating enzyme activity							ATP binding, ubiquitin activating enzyme activity
Ubiquitin-like modifier-activating enzyme 1 OS=Rattus norvegicus OX=10116 GN=Uba1 PE=1 SV=1	UBA1_RAT				cellular response to DNA damage stimulus, protein modification by small protein conjugation, protein ubiquitination, ubiquitin-dependent protein catabolic process							protein modification by small protein conjugation, protein ubiquitination, ubiquitin-dependent protein catabolic process						cellular response to DNA damage stimulus				cytosol, endosome membrane, lysosomal membrane, mitochondrion, rough endoplasmic reticulum membrane		rough endoplasmic reticulum membrane	endosome membrane		endosome membrane, heterochromatin, lysosomal membrane, mitochondrion, nucleoplasm, nucleus, rough endoplasmic reticulum membrane	endosome membrane, lysosomal membrane, rough endoplasmic reticulum membrane	mitochondrion	nucleoplasm	endosome membrane, lysosomal membrane, rough endoplasmic reticulum membrane	endosome membrane, heterochromatin, lysosomal membrane, nucleoplasm, rough endoplasmic reticulum membrane					ATP binding	ubiquitin activating enzyme activity							ATP binding, ubiquitin activating enzyme activity
Ubiquitin-activating enzyme, Chr Y OS=Rattus norvegicus OX=10116 GN=Uba1y PE=3 SV=1	A0A0G2K8A5_RAT
Actin-related protein 3 OS=Rattus norvegicus OX=10116 GN=Actr3 PE=1 SV=1	A0A0G2K1C0_RAT
Similar to RIKEN cDNA 1300017J02 OS=Rattus norvegicus OX=10116 GN=RGD1310507 PE=1 SV=1	A0A0G2K896_RAT
Cluster of Aldehyde dehydrogenase, mitochondrial OS=Rattus norvegicus OX=10116 GN=Aldh2 PE=1 SV=1 (ALDH2_RAT)	ALDH2_RAT [6]		9-cis-retinoic acid biosynthetic process, negative regulation of apoptotic process, negative regulation of cell proliferation, positive regulation of apoptotic process, positive regulation of cell proliferation, positive regulation of gene expression, regulation of endothelial cell proliferation, retinoic acid biosynthetic process, retinoic acid metabolic process, retinoic acid receptor signaling…		9-cis-retinoic acid biosynthetic process, cellular response to fatty acid, cellular response to hormone stimulus, cellular response to retinoic acid, neural crest cell development, neuron differentiation, protein homotetramerization, retinal metabolic process, retinoic acid biosynthetic process, retinoic acid metabolic process, retinoic acid receptor signaling pathway involved in somitogenesis, r…	blood vessel development, cardiac muscle tissue development, determination of bilateral symmetry, embryonic camera-type eye development, embryonic digestive tract development, embryonic forelimb morphogenesis, face development, heart morphogenesis, hindbrain development, kidney development, liver development, lung development, midgut development, morphogenesis of embryonic epithelium, neural cres…						9-cis-retinoic acid biosynthetic process, ethanol catabolic process, retinal metabolic process, retinoic acid biosynthetic process, retinoic acid metabolic process, retinol metabolic process	response to lipopolysaccharide	blood vessel development, cardiac muscle tissue development, determination of bilateral symmetry, embryonic camera-type eye development, embryonic digestive tract development, embryonic forelimb morphogenesis, heart morphogenesis, hindbrain development, kidney development, liver development, lung development, midgut development, morphogenesis of embryonic epithelium, neural crest cell development…				cellular response to fatty acid, cellular response to hormone stimulus, cellular response to retinoic acid, response to cytokine, response to estradiol, response to hyperoxia, response to lipopolysaccharide, response to nicotine, response to progesterone, response to testosterone, response to vitamin A, retinoic acid receptor signaling pathway involved in somitogenesis				cytosol, mitochondrial matrix, mitochondrion, perinuclear region of cytoplasm					mitochondrial matrix, mitochondrion		mitochondrial matrix, mitochondrion			mitochondrial matrix					NADH binding, identical protein binding, retinal binding	3-chloroallyl aldehyde dehydrogenase activity, aldehyde dehydrogenase (NAD) activity, glyceraldehyde-3-phosphate dehydrogenase (NAD+) (non-phosphorylating) activity, retinal dehydrogenase activity							3-chloroallyl aldehyde dehydrogenase activity, NADH binding, aldehyde dehydrogenase (NAD) activity, glyceraldehyde-3-phosphate dehydrogenase (NAD+) (non-phosphorylating) activity, identical protein binding, retinal binding, retinal dehydrogenase activity
Aldehyde dehydrogenase, mitochondrial OS=Rattus norvegicus OX=10116 GN=Aldh2 PE=1 SV=1	ALDH2_RAT		negative regulation of apoptotic process		cellular response to fatty acid, cellular response to hormone stimulus	liver development						ethanol catabolic process	response to lipopolysaccharide	liver development				cellular response to fatty acid, cellular response to hormone stimulus, response to estradiol, response to hyperoxia, response to lipopolysaccharide, response to nicotine, response to progesterone, response to testosterone				mitochondrial matrix, mitochondrion					mitochondrial matrix, mitochondrion		mitochondrial matrix			mitochondrial matrix					NADH binding, identical protein binding	aldehyde dehydrogenase (NAD) activity, glyceraldehyde-3-phosphate dehydrogenase (NAD+) (non-phosphorylating) activity							NADH binding, aldehyde dehydrogenase (NAD) activity, glyceraldehyde-3-phosphate dehydrogenase (NAD+) (non-phosphorylating) activity, identical protein binding
Retinal dehydrogenase 2 OS=Rattus norvegicus OX=10116 GN=Aldh1a2 PE=1 SV=2	AL1A2_RAT		9-cis-retinoic acid biosynthetic process, negative regulation of cell proliferation, positive regulation of apoptotic process, positive regulation of cell proliferation, positive regulation of gene expression, regulation of endothelial cell proliferation, retinoic acid metabolic process, retinoic acid receptor signaling pathway involved in somitogenesis, retinol metabolic process		9-cis-retinoic acid biosynthetic process, cellular response to retinoic acid, neural crest cell development, neuron differentiation, protein homotetramerization, retinal metabolic process, retinoic acid metabolic process, retinoic acid receptor signaling pathway involved in somitogenesis, retinol metabolic process	blood vessel development, cardiac muscle tissue development, determination of bilateral symmetry, embryonic camera-type eye development, embryonic digestive tract development, embryonic forelimb morphogenesis, face development, heart morphogenesis, hindbrain development, kidney development, liver development, lung development, midgut development, morphogenesis of embryonic epithelium, neural cres…						9-cis-retinoic acid biosynthetic process, retinal metabolic process, retinoic acid metabolic process, retinol metabolic process		blood vessel development, cardiac muscle tissue development, determination of bilateral symmetry, embryonic camera-type eye development, embryonic digestive tract development, embryonic forelimb morphogenesis, heart morphogenesis, hindbrain development, kidney development, liver development, lung development, midgut development, morphogenesis of embryonic epithelium, neural crest cell development…				cellular response to retinoic acid, response to cytokine, response to estradiol, response to vitamin A, retinoic acid receptor signaling pathway involved in somitogenesis				cytosol, perinuclear region of cytoplasm															retinal binding	3-chloroallyl aldehyde dehydrogenase activity, aldehyde dehydrogenase (NAD) activity, retinal dehydrogenase activity							3-chloroallyl aldehyde dehydrogenase activity, aldehyde dehydrogenase (NAD) activity, retinal binding, retinal dehydrogenase activity
Retinal dehydrogenase 1 OS=Rattus norvegicus OX=10116 GN=Aldh1a1 PE=1 SV=1	A0A0H2UHP1_RAT (+1)
Aldehyde dehydrogenase X, mitochondrial OS=Rattus norvegicus OX=10116 GN=Aldh1b1 PE=1 SV=1	AL1B1_RAT (+1)											ethanol catabolic process										mitochondrial matrix					mitochondrial matrix		mitochondrial matrix			mitochondrial matrix						aldehyde dehydrogenase (NAD) activity, glyceraldehyde-3-phosphate dehydrogenase (NAD+) (non-phosphorylating) activity							aldehyde dehydrogenase (NAD) activity, glyceraldehyde-3-phosphate dehydrogenase (NAD+) (non-phosphorylating) activity
Cluster of Serine/threonine-protein phosphatase PP1-beta catalytic subunit OS=Rattus norvegicus OX=10116 GN=Ppp1cb PE=1 SV=3 (PP1B_RAT)	PP1B_RAT [3]		circadian regulation of gene expression, entrainment of circadian clock by photoperiod, positive regulation of extrinsic apoptotic signaling pathway in absence of ligand, positive regulation of glial cell proliferation, regulation of cell adhesion, regulation of glycogen biosynthetic process, regulation of glycogen catabolic process, regulation of nucleocytoplasmic transport		cell cycle, cell division, glycogen metabolic process, neuron differentiation, positive regulation of glial cell proliferation, protein dephosphorylation	branching morphogenesis of an epithelial tube, lung development, neuron differentiation, positive regulation of glial cell proliferation						glycogen metabolic process, protein dephosphorylation		branching morphogenesis of an epithelial tube, circadian regulation of gene expression, lung development, neuron differentiation, positive regulation of glial cell proliferation				entrainment of circadian clock by photoperiod, response to lead ion	circadian regulation of gene expression			cytosol, glycogen granule, mitochondrial outer membrane, mitochondrion, protein phosphatase type 1 complex					condensed chromosome kinetochore, mitochondrial outer membrane, mitochondrion, nuclear chromosome, telomeric region, nuclear speck, nucleolus, nucleoplasm, nucleus	mitochondrial outer membrane, plasma membrane	mitochondrial outer membrane, mitochondrion	nuclear chromosome, telomeric region, nuclear speck, nucleolus, nucleoplasm	mitochondrial outer membrane	condensed chromosome kinetochore, mitochondrial outer membrane, nuclear chromosome, telomeric region, nuclear speck, nucleolus, nucleoplasm	plasma membrane				cadherin binding involved in cell-cell adhesion, lamin binding, macromolecular complex binding, metal ion binding, protein C-terminus binding, protein N-terminus binding, protein domain specific binding, protein kinase binding, protein phosphatase 1 binding, ribonucleoprotein complex binding	myosin phosphatase activity, myosin-light-chain-phosphatase activity, phosphoprotein phosphatase activity, protein serine/threonine phosphatase activity							cadherin binding involved in cell-cell adhesion, lamin binding, macromolecular complex binding, metal ion binding, myosin phosphatase activity, myosin-light-chain-phosphatase activity, phosphoprotein phosphatase activity, protein C-terminus binding, protein N-terminus binding, protein domain specific binding, protein kinase binding, protein phosphatase 1 binding, protein serine/threonine phosphat…
Serine/threonine-protein phosphatase PP1-beta catalytic subunit OS=Rattus norvegicus OX=10116 GN=Ppp1cb PE=1 SV=3	PP1B_RAT		circadian regulation of gene expression, entrainment of circadian clock by photoperiod, regulation of cell adhesion, regulation of circadian rhythm, regulation of glycogen biosynthetic process, regulation of glycogen catabolic process		cell cycle, cell division, glycogen metabolic process, protein dephosphorylation							glycogen metabolic process, protein dephosphorylation		circadian regulation of gene expression				entrainment of circadian clock by photoperiod	circadian regulation of gene expression			cytosol, glycogen granule, protein phosphatase type 1 complex					nuclear chromosome, telomeric region, nucleolus, nucleoplasm, nucleus	plasma membrane		nuclear chromosome, telomeric region, nucleolus, nucleoplasm		nuclear chromosome, telomeric region, nucleolus, nucleoplasm	plasma membrane				metal ion binding, protein kinase binding	myosin phosphatase activity, myosin-light-chain-phosphatase activity, protein serine/threonine phosphatase activity							metal ion binding, myosin phosphatase activity, myosin-light-chain-phosphatase activity, protein kinase binding, protein serine/threonine phosphatase activity
Serine/threonine-protein phosphatase PP1-alpha catalytic subunit OS=Rattus norvegicus OX=10116 GN=Ppp1ca PE=1 SV=1	PP1A_RAT		circadian regulation of gene expression, entrainment of circadian clock by photoperiod, positive regulation of extrinsic apoptotic signaling pathway in absence of ligand, regulation of circadian rhythm, regulation of glycogen biosynthetic process, regulation of glycogen catabolic process		cell cycle, cell division, glycogen metabolic process, protein dephosphorylation	branching morphogenesis of an epithelial tube, lung development						glycogen metabolic process, protein dephosphorylation		branching morphogenesis of an epithelial tube, circadian regulation of gene expression, lung development				entrainment of circadian clock by photoperiod, response to lead ion	circadian regulation of gene expression			cytosol, glycogen granule, protein phosphatase type 1 complex					nuclear chromosome, telomeric region, nucleolus, nucleoplasm, nucleus	plasma membrane		nuclear chromosome, telomeric region, nucleolus, nucleoplasm		nuclear chromosome, telomeric region, nucleolus, nucleoplasm	plasma membrane				cadherin binding involved in cell-cell adhesion, metal ion binding, protein phosphatase 1 binding, ribonucleoprotein complex binding	protein serine/threonine phosphatase activity							cadherin binding involved in cell-cell adhesion, metal ion binding, protein phosphatase 1 binding, protein serine/threonine phosphatase activity, ribonucleoprotein complex binding
Serine/threonine-protein phosphatase PP1-gamma catalytic subunit OS=Rattus norvegicus OX=10116 GN=Ppp1cc PE=1 SV=1	PP1G_RAT		circadian regulation of gene expression, entrainment of circadian clock by photoperiod, positive regulation of glial cell proliferation, regulation of nucleocytoplasmic transport		cell cycle, cell division, glycogen metabolic process, neuron differentiation, positive regulation of glial cell proliferation, protein dephosphorylation	neuron differentiation, positive regulation of glial cell proliferation						glycogen metabolic process, protein dephosphorylation		circadian regulation of gene expression, neuron differentiation, positive regulation of glial cell proliferation				entrainment of circadian clock by photoperiod	circadian regulation of gene expression			cytosol, mitochondrial outer membrane, mitochondrion, protein phosphatase type 1 complex					condensed chromosome kinetochore, mitochondrial outer membrane, mitochondrion, nuclear chromosome, telomeric region, nuclear speck, nucleolus, nucleus	mitochondrial outer membrane	mitochondrial outer membrane	nuclear chromosome, telomeric region, nuclear speck, nucleolus	mitochondrial outer membrane	condensed chromosome kinetochore, mitochondrial outer membrane, nuclear chromosome, telomeric region, nuclear speck, nucleolus					lamin binding, macromolecular complex binding, metal ion binding, protein C-terminus binding, protein N-terminus binding, protein domain specific binding, protein kinase binding, protein phosphatase 1 binding, protein phosphatase binding	protein serine/threonine phosphatase activity							lamin binding, macromolecular complex binding, metal ion binding, protein C-terminus binding, protein N-terminus binding, protein domain specific binding, protein kinase binding, protein phosphatase 1 binding, protein phosphatase binding, protein serine/threonine phosphatase activity
Cluster of Adenylate kinase isoenzyme 1 OS=Rattus norvegicus OX=10116 GN=Ak1 PE=1 SV=3 (KAD1_RAT)	KAD1_RAT [2]		positive regulation of glucose transport, positive regulation of neuron maturation		ADP biosynthetic process, AMP metabolic process, ATP metabolic process, adenine metabolic process, inosine biosynthetic process, neuron differentiation, nucleoside diphosphate phosphorylation, nucleoside triphosphate biosynthetic process, positive regulation of neuron maturation	cerebellum development, muscle organ development, neuron differentiation, olfactory bulb development, positive regulation of neuron maturation						ADP biosynthetic process, AMP metabolic process, ATP metabolic process, adenine metabolic process, inosine biosynthetic process, nucleoside diphosphate phosphorylation, nucleoside triphosphate biosynthetic process		cerebellum development, muscle organ development, neuron differentiation, olfactory bulb development, positive regulation of neuron maturation				response to activity, response to drug, response to estradiol, response to testosterone				perinuclear region of cytoplasm, sarcomere					sarcomere					sarcomere					ATP binding	adenylate kinase activity, nucleoside diphosphate kinase activity							ATP binding, adenylate kinase activity, nucleoside diphosphate kinase activity
Adenylate kinase isoenzyme 1 OS=Rattus norvegicus OX=10116 GN=Ak1 PE=1 SV=3	KAD1_RAT		positive regulation of glucose transport, positive regulation of neuron maturation		ADP biosynthetic process, AMP metabolic process, ATP metabolic process, adenine metabolic process, inosine biosynthetic process, neuron differentiation, nucleoside diphosphate phosphorylation, nucleoside triphosphate biosynthetic process, positive regulation of neuron maturation	cerebellum development, muscle organ development, neuron differentiation, olfactory bulb development, positive regulation of neuron maturation						ADP biosynthetic process, AMP metabolic process, ATP metabolic process, adenine metabolic process, inosine biosynthetic process, nucleoside diphosphate phosphorylation, nucleoside triphosphate biosynthetic process		cerebellum development, muscle organ development, neuron differentiation, olfactory bulb development, positive regulation of neuron maturation				response to activity, response to drug, response to estradiol, response to testosterone				perinuclear region of cytoplasm, sarcomere					sarcomere					sarcomere					ATP binding	adenylate kinase activity, nucleoside diphosphate kinase activity							ATP binding, adenylate kinase activity, nucleoside diphosphate kinase activity
Uncharacterized protein OS=Rattus norvegicus OX=10116 PE=3 SV=1	A0A0G2K7Q6_RAT
Ig gamma-2B chain C region OS=Rattus norvegicus OX=10116 GN=Igh-1a PE=1 SV=1	IGG2B_RAT		B cell receptor signaling pathway, complement activation, classical pathway, positive regulation of B cell activation		B cell receptor signaling pathway, phagocytosis, engulfment, phagocytosis, recognition		phagocytosis, engulfment, phagocytosis, recognition		B cell receptor signaling pathway, complement activation, classical pathway, innate immune response	phagocytosis, engulfment, phagocytosis, recognition		complement activation, classical pathway	defense response to bacterium					B cell receptor signaling pathway, complement activation, classical pathway, defense response to bacterium, innate immune response								immunoglobulin complex, circulating		external side of plasma membrane					external side of plasma membrane				antigen binding, immunoglobulin receptor binding								antigen binding, immunoglobulin receptor binding
GM2 ganglioside activator OS=Rattus norvegicus OX=10116 GN=Gm2a PE=1 SV=1	Q6IN37_RAT
Proteasome subunit beta type-3 OS=Rattus norvegicus OX=10116 GN=Psmb3 PE=1 SV=1	PSB3_RAT				proteasomal ubiquitin-independent protein catabolic process, proteasome-mediated ubiquitin-dependent protein catabolic process							proteasomal ubiquitin-independent protein catabolic process, proteasome-mediated ubiquitin-dependent protein catabolic process										cytoplasm					nucleus			nucleus								endopeptidase activity, threonine-type endopeptidase activity							endopeptidase activity, threonine-type endopeptidase activity
BWK4 OS=Rattus norvegicus OX=10116 GN=Erp44 PE=1 SV=1	Q5VLR5_RAT
Vinculin OS=Rattus norvegicus OX=10116 GN=Vcl PE=1 SV=1	A0A0G2K8V2_RAT (+2)
Hyou1 protein OS=Rattus norvegicus OX=10116 GN=Hyou1 PE=1 SV=1	Q6P136_RAT
Cluster of Nucleoside diphosphate kinase B OS=Rattus norvegicus OX=10116 GN=Nme2 PE=1 SV=1 (NDKB_RAT)	NDKB_RAT [2]		adenylate cyclase-activating G-protein coupled receptor signaling pathway, cellular response to glucose stimulus, integrin-mediated signaling pathway, negative regulation of apoptotic process, negative regulation of myeloid leukocyte differentiation, positive regulation of epithelial cell proliferation, positive regulation of keratinocyte differentiation, positive regulation of neuron projection …		CTP biosynthetic process, GTP biosynthetic process, UTP biosynthetic process, adenylate cyclase-activating G-protein coupled receptor signaling pathway, cellular response to fatty acid, cellular response to glucose stimulus, cellular response to oxidative stress, integrin-mediated signaling pathway, nucleoside diphosphate phosphorylation, positive regulation of neuron projection development, prot…	positive regulation of neuron projection development						CTP biosynthetic process, GTP biosynthetic process, UTP biosynthetic process, nucleoside diphosphate phosphorylation, protein autophosphorylation, pyrimidine nucleotide metabolic process		positive regulation of neuron projection development				adenylate cyclase-activating G-protein coupled receptor signaling pathway, cellular response to fatty acid, cellular response to glucose stimulus, cellular response to oxidative stress, integrin-mediated signaling pathway, response to growth hormone				mitochondrial membrane, perinuclear region of cytoplasm					mitochondrial membrane, nucleus	mitochondrial membrane	mitochondrial membrane	nucleus	mitochondrial membrane	mitochondrial membrane					ATP binding, G-quadruplex DNA binding, GDP binding, drug binding, enzyme binding, fatty acid binding, intermediate filament binding, metal ion binding	nucleoside diphosphate kinase activity, protein histidine kinase activity, protein serine/threonine kinase activity							ATP binding, G-quadruplex DNA binding, GDP binding, drug binding, enzyme binding, fatty acid binding, intermediate filament binding, metal ion binding, nucleoside diphosphate kinase activity, protein histidine kinase activity, protein serine/threonine kinase activity, transcription coactivator activity
Nucleoside diphosphate kinase B OS=Rattus norvegicus OX=10116 GN=Nme2 PE=1 SV=1	NDKB_RAT		adenylate cyclase-activating G-protein coupled receptor signaling pathway, cellular response to glucose stimulus, integrin-mediated signaling pathway, negative regulation of apoptotic process, negative regulation of myeloid leukocyte differentiation, positive regulation of epithelial cell proliferation, positive regulation of keratinocyte differentiation, positive regulation of neuron projection …		CTP biosynthetic process, GTP biosynthetic process, UTP biosynthetic process, adenylate cyclase-activating G-protein coupled receptor signaling pathway, cellular response to fatty acid, cellular response to glucose stimulus, cellular response to oxidative stress, integrin-mediated signaling pathway, nucleoside diphosphate phosphorylation, positive regulation of neuron projection development, prot…	positive regulation of neuron projection development						CTP biosynthetic process, GTP biosynthetic process, UTP biosynthetic process, nucleoside diphosphate phosphorylation, protein autophosphorylation, pyrimidine nucleotide metabolic process		positive regulation of neuron projection development				adenylate cyclase-activating G-protein coupled receptor signaling pathway, cellular response to fatty acid, cellular response to glucose stimulus, cellular response to oxidative stress, integrin-mediated signaling pathway, response to growth hormone				mitochondrial membrane, perinuclear region of cytoplasm					mitochondrial membrane, nucleus	mitochondrial membrane	mitochondrial membrane	nucleus	mitochondrial membrane	mitochondrial membrane					ATP binding, G-quadruplex DNA binding, GDP binding, drug binding, enzyme binding, fatty acid binding, intermediate filament binding, metal ion binding	nucleoside diphosphate kinase activity, protein histidine kinase activity, protein serine/threonine kinase activity							ATP binding, G-quadruplex DNA binding, GDP binding, drug binding, enzyme binding, fatty acid binding, intermediate filament binding, metal ion binding, nucleoside diphosphate kinase activity, protein histidine kinase activity, protein serine/threonine kinase activity, transcription coactivator activity
Nucleoside diphosphate kinase A OS=Rattus norvegicus OX=10116 GN=Nme1 PE=1 SV=1	NDKA_RAT
6-phosphogluconolactonase OS=Rattus norvegicus OX=10116 GN=Pgls PE=1 SV=1	6PGL_RAT (+1)				pentose-phosphate shunt, oxidative branch							carbohydrate metabolic process, pentose-phosphate shunt, oxidative branch										cytoplasm															monosaccharide binding	6-phosphogluconolactonase activity							6-phosphogluconolactonase activity, monosaccharide binding
Canopy 2 homolog (Zebrafish) OS=Rattus norvegicus OX=10116 GN=Cnpy2 PE=1 SV=1	A0JN30_RAT
Pro-cathepsin H OS=Rattus norvegicus OX=10116 GN=Ctsh PE=1 SV=1	A0A0G2K8H6_RAT (+1)
Alpha-1-antiproteinase OS=Rattus norvegicus OX=10116 GN=Serpina1 PE=1 SV=1	A0A0G2JY31_RAT (+2)
14-3-3 protein eta OS=Rattus norvegicus OX=10116 GN=Ywhah PE=1 SV=2	1433F_RAT		glucocorticoid receptor signaling pathway, membrane depolarization during action potential, negative regulation of dendrite morphogenesis, positive regulation of transcription, DNA-templated, regulation of sodium ion transmembrane transporter activity, regulation of sodium ion transport		glucocorticoid receptor signaling pathway, negative regulation of dendrite morphogenesis	negative regulation of dendrite morphogenesis	intracellular protein transport			intracellular protein transport		glucocorticoid catabolic process		negative regulation of dendrite morphogenesis				glucocorticoid receptor signaling pathway				cytoplasm						plasma membrane					plasma membrane				actin binding, enzyme binding, glucocorticoid receptor binding, identical protein binding, ion channel binding, protein domain specific binding, protein heterodimerization activity								actin binding, enzyme binding, glucocorticoid receptor binding, identical protein binding, ion channel binding, protein domain specific binding, protein heterodimerization activity, sodium channel regulator activity
Similar to 60S acidic ribosomal protein P2 OS=Rattus norvegicus OX=10116 GN=LOC498555 PE=3 SV=1	D4A4D5_RAT (+1)
Cluster of Phosphoglycerate kinase 1 OS=Rattus norvegicus OX=10116 GN=Pgk1 PE=1 SV=2 (PGK1_RAT)	PGK1_RAT [2]		positive regulation of oxidative phosphorylation		glycolytic process, phosphorylation							carbohydrate metabolic process, gluconeogenesis, glycolytic process, phosphorylation										cytosol															ADP binding, ATP binding	phosphoglycerate kinase activity							ADP binding, ATP binding, phosphoglycerate kinase activity
Phosphoglycerate kinase 1 OS=Rattus norvegicus OX=10116 GN=Pgk1 PE=1 SV=2	PGK1_RAT		positive regulation of oxidative phosphorylation		glycolytic process, phosphorylation							carbohydrate metabolic process, gluconeogenesis, glycolytic process, phosphorylation										cytosol															ADP binding, ATP binding	phosphoglycerate kinase activity							ADP binding, ATP binding, phosphoglycerate kinase activity
Phosphoglycerate kinase OS=Rattus norvegicus OX=10116 GN=RGD1560402 PE=3 SV=1	M0R6Y8_RAT
Cluster of Actin, cytoplasmic 2 OS=Rattus norvegicus OX=10116 GN=Actg1 PE=1 SV=1 (ACTG_RAT)	ACTG_RAT [6]		positive regulation of ERK1 and ERK2 cascade, positive regulation of gene expression, positive regulation of hepatic stellate cell activation, regulation of cyclin-dependent protein serine/threonine kinase activity, regulation of norepinephrine uptake, regulation of transmembrane transporter activity, regulation of wound healing, vascular smooth muscle contraction		axonogenesis, cell motility, cellular response to electrical stimulus, cellular response to organonitrogen compound, skeletal muscle fiber adaptation, skeletal muscle fiber development, skeletal muscle thin filament assembly	axonogenesis, mesenchyme migration, retina development in camera-type eye, skeletal muscle fiber development, skeletal muscle thin filament assembly	synaptic vesicle endocytosis			cell motility, synaptic vesicle endocytosis	cell motility			axonogenesis, mesenchyme migration, muscle contraction, retina development in camera-type eye, skeletal muscle fiber adaptation, skeletal muscle fiber development, vascular smooth muscle contraction				cellular response to electrical stimulus, cellular response to organonitrogen compound, response to calcium ion, response to extracellular stimulus, response to immobilization stress, response to lithium ion, response to mechanical stimulus, response to steroid hormone, skeletal muscle fiber adaptation	circadian rhythm			cytoplasm, cytosol, dense body, sarcomere, striated muscle thin filament	actin filament, myosin filament, podosome, postsynaptic actin cytoskeleton, stress fiber, striated muscle thin filament				NuA4 histone acetyltransferase complex, actin filament, cytoskeleton, myosin filament, nucleus, podosome, postsynaptic actin cytoskeleton, sarcomere, stress fiber, striated muscle thin filament	membrane raft, plasma membrane		NuA4 histone acetyltransferase complex		NuA4 histone acetyltransferase complex, actin filament, myosin filament, podosome, sarcomere, stress fiber, striated muscle thin filament	plasma membrane				ATP binding, protein kinase binding								ATP binding, protein kinase binding, structural constituent of postsynaptic actin cytoskeleton
Actin, cytoplasmic 2 OS=Rattus norvegicus OX=10116 GN=Actg1 PE=1 SV=1	ACTG_RAT						synaptic vesicle endocytosis			synaptic vesicle endocytosis								response to calcium ion, response to mechanical stimulus				cytosol, dense body	actin filament, cytoskeleton, postsynaptic actin cytoskeleton				actin filament, cytoskeleton, postsynaptic actin cytoskeleton	plasma membrane				actin filament	plasma membrane				ATP binding								ATP binding, structural constituent of postsynaptic actin cytoskeleton
Actin, cytoplasmic 1 OS=Rattus norvegicus OX=10116 GN=Actb PE=1 SV=1	ACTB_RAT		regulation of cyclin-dependent protein serine/threonine kinase activity, regulation of norepinephrine uptake, regulation of transmembrane transporter activity		axonogenesis, cell motility, cellular response to electrical stimulus	axonogenesis, retina development in camera-type eye	synaptic vesicle endocytosis			cell motility, synaptic vesicle endocytosis	cell motility			axonogenesis, retina development in camera-type eye				cellular response to electrical stimulus, response to immobilization stress, response to mechanical stimulus	circadian rhythm			cytoplasm, cytosol, dense body	actin filament, podosome, stress fiber				NuA4 histone acetyltransferase complex, actin filament, cytoskeleton, nucleus, podosome, stress fiber	membrane raft, plasma membrane		NuA4 histone acetyltransferase complex		NuA4 histone acetyltransferase complex, actin filament, podosome, stress fiber	plasma membrane				ATP binding, protein kinase binding								ATP binding, protein kinase binding, structural constituent of postsynaptic actin cytoskeleton
Actin, beta-like 2 OS=Rattus norvegicus OX=10116 GN=Actbl2 PE=1 SV=1	D3ZRN3_RAT
Actin, alpha skeletal muscle OS=Rattus norvegicus OX=10116 GN=Acta1 PE=1 SV=1	ACTS_RAT		positive regulation of gene expression		cellular response to organonitrogen compound, skeletal muscle fiber adaptation, skeletal muscle fiber development, skeletal muscle thin filament assembly	mesenchyme migration, skeletal muscle fiber development, skeletal muscle thin filament assembly								mesenchyme migration, skeletal muscle fiber adaptation, skeletal muscle fiber development				cellular response to organonitrogen compound, response to extracellular stimulus, response to lithium ion, response to mechanical stimulus, response to steroid hormone, skeletal muscle fiber adaptation				sarcomere, striated muscle thin filament	actin cytoskeleton, actin filament, stress fiber, striated muscle thin filament				actin cytoskeleton, actin filament, sarcomere, stress fiber, striated muscle thin filament					actin filament, sarcomere, stress fiber, striated muscle thin filament					ATP binding								ATP binding
Actin, aortic smooth muscle OS=Rattus norvegicus OX=10116 GN=Acta2 PE=2 SV=1	ACTA_RAT		positive regulation of ERK1 and ERK2 cascade, positive regulation of gene expression, positive regulation of hepatic stellate cell activation, regulation of wound healing, vascular smooth muscle contraction			mesenchyme migration								mesenchyme migration, vascular smooth muscle contraction								cytoplasm	actin cytoskeleton, stress fiber				actin cytoskeleton, stress fiber					stress fiber					ATP binding								ATP binding
Actin, gamma-enteric smooth muscle OS=Rattus norvegicus OX=10116 GN=Actg2 PE=2 SV=1	ACTH_RAT		positive regulation of gene expression			mesenchyme migration								mesenchyme migration								cytoplasm	actin cytoskeleton, myosin filament				actin cytoskeleton, myosin filament					myosin filament					ATP binding								ATP binding
X-prolyl aminopeptidase (Aminopeptidase P) 1, soluble, isoform CRA_a OS=Rattus norvegicus OX=10116 GN=Xpnpep1 PE=1 SV=1	A0A0G2JV31_RAT (+1)
40S ribosomal protein S5 OS=Rattus norvegicus OX=10116 GN=Rps5 PE=1 SV=1	B0BN81_RAT
Cluster of Tubulin alpha chain OS=Rattus norvegicus OX=10116 GN=LOC100909441 PE=3 SV=1 (A0A0H2UHM7_RAT)	A0A0H2UHM7_RAT [4]				microtubule cytoskeleton organization, microtubule-based process, mitotic cell cycle																	cytoplasm	microtubule				microtubule					microtubule					GTP binding, protein kinase binding	GTPase activity							GTP binding, GTPase activity, protein kinase binding, structural constituent of cytoskeleton
Tubulin alpha-8 chain OS=Rattus norvegicus OX=10116 GN=Tuba8 PE=2 SV=1	TBA8_RAT				microtubule cytoskeleton organization, microtubule-based process, mitotic cell cycle																	cytoplasm	microtubule				microtubule					microtubule					GTP binding	GTPase activity							GTP binding, GTPase activity, structural constituent of cytoskeleton
Tubulin alpha chain OS=Rattus norvegicus OX=10116 GN=LOC100909441 PE=3 SV=1	A0A0H2UHM7_RAT (+1)
Tubulin alpha-4A chain OS=Rattus norvegicus OX=10116 GN=Tuba4a PE=1 SV=1	TBA4A_RAT				microtubule cytoskeleton organization, microtubule-based process, mitotic cell cycle																	cytoplasm	microtubule				microtubule					microtubule					GTP binding, protein kinase binding	GTPase activity							GTP binding, GTPase activity, protein kinase binding, structural constituent of cytoskeleton
Reticulocalbin-3 OS=Rattus norvegicus OX=10116 GN=Rcn3 PE=1 SV=1	A0A0G2K022_RAT (+1)
Leukocyte elastase inhibitor A OS=Rattus norvegicus OX=10116 GN=Serpinb1a PE=1 SV=1	ILEUA_RAT		cellular homeostasis, negative regulation of endopeptidase activity, negative regulation of interleukin-1 beta secretion, regulation of innate immune response, regulation of protein catabolic process		cellular homeostasis													inflammatory response				cytoplasm				extracellular space																	serine-type endopeptidase inhibitor activity		serine-type endopeptidase inhibitor activity
Septin-2 OS=Rattus norvegicus OX=10116 GN=Sept2 PE=1 SV=1	SEPT2_RAT		smoothened signaling pathway		cilium assembly, cytoskeleton-dependent cytokinesis, neuron projection development, smoothened signaling pathway	neuron projection development							spermatogenesis	neuron projection development, spermatogenesis		spermatogenesis	spermatogenesis	smoothened signaling pathway				exocyst, perinuclear region of cytoplasm, septin complex, septin ring	axoneme, microtubule cytoskeleton, septin complex, septin ring, spindle				axoneme, microtubule cytoskeleton, nucleus, septin complex, septin ring, spindle	ciliary membrane		nucleus	ciliary membrane	axoneme, ciliary membrane, photoreceptor connecting cilium, septin complex, septin ring, sperm annulus, spindle	ciliary membrane				GTP binding	GTPase activity							GTP binding, GTPase activity
Cluster of Uncharacterized protein OS=Rattus norvegicus OX=10116 PE=4 SV=1 (A0A0G2JZW1_RAT)	A0A0G2JZW1_RAT [5]		B cell receptor signaling pathway, complement activation, classical pathway, positive regulation of B cell activation		B cell receptor signaling pathway, phagocytosis, engulfment, phagocytosis, recognition		phagocytosis, engulfment, phagocytosis, recognition		B cell receptor signaling pathway, complement activation, classical pathway, innate immune response	phagocytosis, engulfment, phagocytosis, recognition		complement activation, classical pathway	defense response to bacterium					B cell receptor signaling pathway, complement activation, classical pathway, defense response to bacterium, innate immune response								immunoglobulin complex, circulating		external side of plasma membrane					external side of plasma membrane				antigen binding, immunoglobulin receptor binding								antigen binding, immunoglobulin receptor binding
Uncharacterized protein OS=Rattus norvegicus OX=10116 PE=4 SV=1	A0A0G2JZW1_RAT (+3)
Ig kappa chain C region, A allele OS=Rattus norvegicus OX=10116 PE=1 SV=1	KACA_RAT		B cell receptor signaling pathway, complement activation, classical pathway, positive regulation of B cell activation		B cell receptor signaling pathway, phagocytosis, engulfment, phagocytosis, recognition		phagocytosis, engulfment, phagocytosis, recognition		B cell receptor signaling pathway, complement activation, classical pathway, innate immune response	phagocytosis, engulfment, phagocytosis, recognition		complement activation, classical pathway	defense response to bacterium					B cell receptor signaling pathway, complement activation, classical pathway, defense response to bacterium, innate immune response								immunoglobulin complex, circulating		external side of plasma membrane					external side of plasma membrane				antigen binding, immunoglobulin receptor binding								antigen binding, immunoglobulin receptor binding
Proteasome subunit alpha type-6 OS=Rattus norvegicus OX=10116 GN=Psma6 PE=1 SV=1	PSA6_RAT		positive regulation of NF-kappaB transcription factor activity		proteasomal ubiquitin-independent protein catabolic process, proteasome-mediated ubiquitin-dependent protein catabolic process, proteolysis involved in cellular protein catabolic process							proteasomal ubiquitin-independent protein catabolic process, proteasome-mediated ubiquitin-dependent protein catabolic process, proteolysis involved in cellular protein catabolic process										P-body, myofibril, sarcomere					P-body, myofibril, nuclear matrix, nucleoplasm, nucleus, sarcomere			nuclear matrix, nucleoplasm		nuclear matrix, nucleoplasm, sarcomere					NF-kappaB binding, RNA binding	threonine-type endopeptidase activity							NF-kappaB binding, RNA binding, threonine-type endopeptidase activity
Apolipoprotein A-I OS=Rattus norvegicus OX=10116 GN=Apoa1 PE=1 SV=2	APOA1_RAT		G-protein coupled receptor signaling pathway, cholesterol homeostasis, high-density lipoprotein particle assembly, high-density lipoprotein particle remodeling, integrin-mediated signaling pathway, negative regulation of cell adhesion molecule production, negative regulation of cytokine secretion involved in immune response, negative regulation of heterotypic cell-cell adhesion, negative regulati…		G-protein coupled receptor signaling pathway, high-density lipoprotein particle assembly, high-density lipoprotein particle remodeling, integrin-mediated signaling pathway, peptidyl-methionine modification, peripheral nervous system axon regeneration, phosphatidylcholine biosynthetic process, protein oxidation, very-low-density lipoprotein particle remodeling	animal organ regeneration, peripheral nervous system axon regeneration	cholesterol efflux, cholesterol import, cholesterol transport, phospholipid efflux, phospholipid transport, reverse cholesterol transport, vitamin transport			cholesterol efflux, cholesterol import, cholesterol transport, phospholipid efflux, phospholipid transport, reverse cholesterol transport, vitamin transport		cholesterol biosynthetic process, lipoprotein metabolic process, peptidyl-methionine modification, phosphatidylcholine biosynthetic process, protein oxidation		animal organ regeneration, high-density lipoprotein particle assembly, high-density lipoprotein particle remodeling, peripheral nervous system axon regeneration, very-low-density lipoprotein particle remodeling				G-protein coupled receptor signaling pathway, integrin-mediated signaling pathway, peripheral nervous system axon regeneration, response to drug, response to estrogen, response to nutrient				endocytic vesicle				chylomicron, discoidal high-density lipoprotein particle, extracellular space, intermediate-density lipoprotein particle, low-density lipoprotein particle, spherical high-density lipoprotein particle, very-low-density lipoprotein particle	endocytic vesicle, nucleus			nucleus							apolipoprotein A-I receptor binding, beta-amyloid binding, cholesterol binding, enzyme binding, heat shock protein binding, high-density lipoprotein particle receptor binding, identical protein binding, phosphatidylcholine binding				chemorepellent activity		lipase inhibitor activity, phosphatidylcholine-sterol O-acyltransferase activator activity		apolipoprotein A-I receptor binding, beta-amyloid binding, chemorepellent activity, cholesterol binding, enzyme binding, heat shock protein binding, high-density lipoprotein particle receptor binding, identical protein binding, lipase inhibitor activity, phosphatidylcholine binding, phosphatidylcholine-sterol O-acyltransferase activator activity, phospholipid transporter activity
Cluster of Guanine nucleotide-binding protein G(I)/G(S)/G(T) subunit beta-1 OS=Rattus norvegicus OX=10116 GN=Gnb1 PE=1 SV=4 (GBB1_RAT)	GBB1_RAT [2]		G-protein coupled receptor signaling pathway, phospholipase C-activating G-protein coupled receptor signaling pathway, positive regulation of cytosolic calcium ion concentration		G-protein coupled receptor signaling pathway, cardiac muscle cell apoptotic process, cellular response to hypoxia, phospholipase C-activating G-protein coupled receptor signaling pathway, positive regulation of cytosolic calcium ion concentration	retina development in camera-type eye								retina development in camera-type eye, sensory perception of taste				G-protein coupled receptor signaling pathway, cellular response to hypoxia, phospholipase C-activating G-protein coupled receptor signaling pathway				perinuclear region of cytoplasm						heterotrimeric G-protein complex, photoreceptor outer segment membrane			photoreceptor outer segment membrane	photoreceptor outer segment membrane	heterotrimeric G-protein complex, photoreceptor outer segment membrane				GTPase binding, macromolecular complex binding, spectrin binding	GTPase activity, alkylglycerophosphoethanolamine phosphodiesterase activity							GTPase activity, GTPase binding, alkylglycerophosphoethanolamine phosphodiesterase activity, calcium channel regulator activity, macromolecular complex binding, spectrin binding
Guanine nucleotide-binding protein G(I)/G(S)/G(T) subunit beta-1 OS=Rattus norvegicus OX=10116 GN=Gnb1 PE=1 SV=4	GBB1_RAT		phospholipase C-activating G-protein coupled receptor signaling pathway, positive regulation of cytosolic calcium ion concentration		cardiac muscle cell apoptotic process, cellular response to hypoxia, phospholipase C-activating G-protein coupled receptor signaling pathway, positive regulation of cytosolic calcium ion concentration	retina development in camera-type eye								retina development in camera-type eye, sensory perception of taste				cellular response to hypoxia, phospholipase C-activating G-protein coupled receptor signaling pathway										heterotrimeric G-protein complex, photoreceptor outer segment membrane			photoreceptor outer segment membrane	photoreceptor outer segment membrane	heterotrimeric G-protein complex, photoreceptor outer segment membrane				GTPase binding, spectrin binding	GTPase activity, alkylglycerophosphoethanolamine phosphodiesterase activity							GTPase activity, GTPase binding, alkylglycerophosphoethanolamine phosphodiesterase activity, spectrin binding
Guanine nucleotide-binding protein G(I)/G(S)/G(T) subunit beta-2 OS=Rattus norvegicus OX=10116 GN=Gnb2 PE=1 SV=4	GBB2_RAT		signal transduction		signal transduction													signal transduction				perinuclear region of cytoplasm															GTPase binding, macromolecular complex binding								GTPase binding, calcium channel regulator activity, macromolecular complex binding
Ubiquitin-conjugating enzyme E2 N OS=Rattus norvegicus OX=10116 GN=Ube2n PE=1 SV=1	UBE2N_RAT		T cell receptor signaling pathway, positive regulation of DNA repair, positive regulation of I-kappaB kinase/NF-kappaB signaling, positive regulation of NF-kappaB transcription factor activity, positive regulation of histone modification, positive regulation of ubiquitin-protein transferase activity, regulation of histone ubiquitination		DNA double-strand break processing, T cell receptor signaling pathway, double-strand break repair via homologous recombination, histone ubiquitination, postreplication repair, protein K63-linked ubiquitination, ubiquitin-dependent protein catabolic process				T cell receptor signaling pathway			DNA double-strand break processing, double-strand break repair via homologous recombination, histone ubiquitination, postreplication repair, protein K63-linked ubiquitination, ubiquitin-dependent protein catabolic process						DNA double-strand break processing, T cell receptor signaling pathway, double-strand break repair via homologous recombination, postreplication repair				cytoplasm					fibrillar center, nucleus			fibrillar center		fibrillar center					ATP binding, ubiquitin binding, ubiquitin protein ligase binding	ubiquitin conjugating enzyme activity							ATP binding, ubiquitin binding, ubiquitin conjugating enzyme activity, ubiquitin protein ligase binding
Receptor of activated protein C kinase 1 OS=Rattus norvegicus OX=10116 GN=Rack1 PE=1 SV=3	RACK1_RAT		negative regulation of Wnt signaling pathway, negative regulation of cell growth, negative regulation of phagocytosis, negative regulation of translation, positive regulation of GTPase activity, positive regulation of Golgi to plasma membrane protein transport, positive regulation of apoptotic process, positive regulation of cell migration, positive regulation of gastrulation, positive regulation…		apoptotic process, cell cycle, cellular response to growth factor stimulus, osteoblast differentiation, protein kinase C-activating G-protein coupled receptor signaling pathway, protein ubiquitination, rescue of stalled ribosome	gastrulation, osteoblast differentiation						protein ubiquitination, rescue of stalled ribosome		gastrulation, osteoblast differentiation				cellular response to growth factor stimulus, protein kinase C-activating G-protein coupled receptor signaling pathway	rhythmic process			cytosol, cytosolic small ribosomal subunit, perinuclear region of cytoplasm					cytosolic small ribosomal subunit, nucleus	phagocytic cup		nucleus		cytosolic small ribosomal subunit	phagocytic cup	cytosolic small ribosomal subunit			SH2 domain binding, protein kinase C binding, receptor tyrosine kinase binding, ribosome binding						protein tyrosine kinase inhibitor activity		SH2 domain binding, protein kinase C binding, protein tyrosine kinase inhibitor activity, receptor tyrosine kinase binding, ribosome binding
Cluster of Serine protease inhibitor A3K OS=Rattus norvegicus OX=10116 GN=Serpina3k PE=1 SV=3 (SPA3K_RAT)	SPA3K_RAT [2]		negative regulation of endopeptidase activity																							extracellular space																	serine-type endopeptidase inhibitor activity		serine-type endopeptidase inhibitor activity
Serine protease inhibitor A3K OS=Rattus norvegicus OX=10116 GN=Serpina3k PE=1 SV=3	SPA3K_RAT		negative regulation of endopeptidase activity																							extracellular space																	serine-type endopeptidase inhibitor activity		serine-type endopeptidase inhibitor activity
RCG20603 OS=Rattus norvegicus OX=10116 GN=Serpina3c PE=3 SV=1	A0A0G2JSK1_RAT
Glucose-6-phosphate isomerase OS=Rattus norvegicus OX=10116 GN=Gpi PE=1 SV=1	G6PI_RAT		erythrocyte homeostasis, glucose homeostasis, negative regulation of cysteine-type endopeptidase activity involved in apoptotic process, negative regulation of neuron apoptotic process		aldehyde catabolic process, glucose 6-phosphate metabolic process, glycolytic process, methylglyoxal biosynthetic process	in utero embryonic development, mesoderm formation			erythrocyte homeostasis			aldehyde catabolic process, carbohydrate metabolic process, gluconeogenesis, glucose 6-phosphate metabolic process, glycolytic process, methylglyoxal biosynthetic process		in utero embryonic development, learning or memory, mesoderm formation				response to cadmium ion, response to estradiol, response to immobilization stress, response to morphine, response to muscle stretch, response to progesterone, response to testosterone				cytoplasm, cytosol				extracellular space		ciliary membrane			ciliary membrane	ciliary membrane	ciliary membrane				cytokine activity, growth factor activity, monosaccharide binding	glucose-6-phosphate isomerase activity, intramolecular transferase activity							cytokine activity, glucose-6-phosphate isomerase activity, growth factor activity, intramolecular transferase activity, monosaccharide binding
Carbonic anhydrase 2 OS=Rattus norvegicus OX=10116 GN=Ca2 PE=1 SV=2	CAH2_RAT		angiotensin-activated signaling pathway, positive regulation of bone resorption, positive regulation of cellular pH reduction, positive regulation of dipeptide transmembrane transport, positive regulation of osteoclast differentiation, positive regulation of synaptic transmission, GABAergic, regulation of bone resorption, regulation of cellular pH, regulation of chloride transport, regulation of …		angiotensin-activated signaling pathway, cellular response to fluid shear stress, osteoclast differentiation, positive regulation of cellular pH reduction, regulation of cellular pH	kidney development, morphogenesis of an epithelium, odontogenesis of dentin-containing tooth, osteoclast differentiation	carbon dioxide transport, secretion		osteoclast differentiation	carbon dioxide transport, secretion				kidney development, odontogenesis of dentin-containing tooth, osteoclast differentiation				angiotensin-activated signaling pathway, cellular response to fluid shear stress, response to estrogen, response to organic substance, response to pH, response to steroid hormone, response to zinc ion				cytosol				extracellular space		basolateral plasma membrane, plasma membrane					basolateral plasma membrane				zinc ion binding	arylesterase activity, carbonate dehydratase activity							arylesterase activity, carbonate dehydratase activity, zinc ion binding
Small ubiquitin-related modifier 2 OS=Rattus norvegicus OX=10116 GN=Sumo2 PE=1 SV=1	SUMO2_RAT		negative regulation of transcription, DNA-templated, positive regulation of protein sumoylation		protein sumoylation					cellular protein localization		protein sumoylation															PML body, nucleus			PML body		PML body					retinoid X receptor binding, ubiquitin protein ligase binding								retinoid X receptor binding, ubiquitin protein ligase binding
Cluster of Tubulin beta-5 chain OS=Rattus norvegicus OX=10116 GN=Tubb5 PE=1 SV=1 (TBB5_RAT)	TBB5_RAT [7]		netrin-activated signaling pathway, regulation of synapse organization		axon guidance, microtubule cytoskeleton organization, microtubule-based process, mitotic cell cycle, netrin-activated signaling pathway, neuron differentiation, neuron migration, spindle assembly	axon guidance, dorsal root ganglion development, neuron differentiation, neuron migration				neuron migration	axon guidance, neuron migration			axon guidance, dorsal root ganglion development, neuron migration				axon guidance, netrin-activated signaling pathway				cytoplasm, cytoplasmic ribonucleoprotein granule	microtubule				cytoplasmic ribonucleoprotein granule, microtubule, nuclear envelope lumen	membrane raft		nuclear envelope lumen		microtubule, nuclear envelope lumen					GTP binding, GTPase activating protein binding, MHC class I protein binding, macromolecular complex binding, netrin receptor binding, peptide binding, protein domain specific binding, ubiquitin protein ligase binding	GTPase activity							GTP binding, GTPase activating protein binding, GTPase activity, MHC class I protein binding, macromolecular complex binding, netrin receptor binding, peptide binding, protein domain specific binding, structural constituent of cytoskeleton, ubiquitin protein ligase binding
Tubulin beta chain OS=Rattus norvegicus OX=10116 GN=Tubb4b PE=1 SV=2	G3V7C6_RAT
Tubulin beta chain OS=Rattus norvegicus OX=10116 GN=Tubb4a PE=1 SV=1	B4F7C2_RAT
Tubulin beta chain OS=Rattus norvegicus OX=10116 GN=Tubb6 PE=1 SV=1	Q4QQV0_RAT
Tubulin beta-2A chain OS=Rattus norvegicus OX=10116 GN=Tubb2a PE=1 SV=1	TBB2A_RAT				microtubule cytoskeleton organization, microtubule-based process, mitotic cell cycle, neuron migration	neuron migration				neuron migration	neuron migration			neuron migration								cytoplasm	microtubule				microtubule					microtubule					GTP binding	GTPase activity							GTP binding, GTPase activity, structural constituent of cytoskeleton
Tubulin beta-3 chain OS=Rattus norvegicus OX=10116 GN=Tubb3 PE=1 SV=1	TBB3_RAT		netrin-activated signaling pathway		axon guidance, microtubule cytoskeleton organization, microtubule-based process, mitotic cell cycle, netrin-activated signaling pathway, neuron differentiation	axon guidance, dorsal root ganglion development, neuron differentiation					axon guidance			axon guidance, dorsal root ganglion development, neuron differentiation				axon guidance, netrin-activated signaling pathway				cytoplasm	microtubule				microtubule					microtubule					GTP binding, netrin receptor binding, peptide binding	GTPase activity							GTP binding, GTPase activity, netrin receptor binding, peptide binding, structural constituent of cytoskeleton
Tubulin beta-5 chain OS=Rattus norvegicus OX=10116 GN=Tubb5 PE=1 SV=1	TBB5_RAT		regulation of synapse organization		microtubule-based process, mitotic cell cycle, spindle assembly																	cytoplasm, cytoplasmic ribonucleoprotein granule	microtubule				cytoplasmic ribonucleoprotein granule, microtubule, nuclear envelope lumen	membrane raft		nuclear envelope lumen		microtubule, nuclear envelope lumen					GTP binding, GTPase activating protein binding, MHC class I protein binding, macromolecular complex binding, protein domain specific binding, ubiquitin protein ligase binding	GTPase activity							GTP binding, GTPase activating protein binding, GTPase activity, MHC class I protein binding, macromolecular complex binding, protein domain specific binding, structural constituent of cytoskeleton, ubiquitin protein ligase binding
Tubulin beta chain OS=Rattus norvegicus OX=10116 GN=Tubb1 PE=1 SV=1	M0R8B6_RAT
Cluster of Proteasome subunit alpha type OS=Rattus norvegicus OX=10116 GN=Psma5 PE=1 SV=1 (Q6P9V6_RAT)	Q6P9V6_RAT [2]				proteasomal ubiquitin-independent protein catabolic process, proteasome-mediated ubiquitin-dependent protein catabolic process							proteasomal ubiquitin-independent protein catabolic process, proteasome-mediated ubiquitin-dependent protein catabolic process										cytoplasm					nucleus			nucleus								endopeptidase activity, threonine-type endopeptidase activity							endopeptidase activity, threonine-type endopeptidase activity
Proteasome subunit alpha type-5 OS=Rattus norvegicus OX=10116 GN=Psma5 PE=1 SV=1	PSA5_RAT				proteasomal ubiquitin-independent protein catabolic process, proteasome-mediated ubiquitin-dependent protein catabolic process							proteasomal ubiquitin-independent protein catabolic process, proteasome-mediated ubiquitin-dependent protein catabolic process										cytoplasm					nucleus			nucleus								endopeptidase activity, threonine-type endopeptidase activity							endopeptidase activity, threonine-type endopeptidase activity
Proteasome subunit alpha type OS=Rattus norvegicus OX=10116 GN=Psma5 PE=1 SV=1	Q6P9V6_RAT
Cluster of Myosin heavy chain 9-like 1 OS=Rattus norvegicus OX=10116 GN=Myh9 PE=1 SV=1 (G3V6P7_RAT)	G3V6P7_RAT [3]
Myosin heavy chain 9-like 1 OS=Rattus norvegicus OX=10116 GN=Myh9 PE=1 SV=1	G3V6P7_RAT
Myosin, heavy polypeptide 10, non-muscle, isoform CRA_b OS=Rattus norvegicus OX=10116 GN=Myh10 PE=1 SV=1	G3V9Y1_RAT (+1)
Eukaryotic translation initiation factor 5A-1 OS=Rattus norvegicus OX=10116 GN=Eif5a PE=1 SV=3	IF5A1_RAT		negative regulation of apoptotic process, positive regulation of cardiac muscle cell apoptotic process, positive regulation of cytosolic calcium ion concentration, positive regulation of muscle cell differentiation, positive regulation of reactive oxygen species metabolic process, positive regulation of translational elongation, positive regulation of translational termination		cellular response to thyroid hormone stimulus, positive regulation of cytosolic calcium ion concentration, translational frameshifting	aging	mRNA transport, protein transport			mRNA transport, protein transport		translational frameshifting						cellular response to thyroid hormone stimulus				endoplasmic reticulum membrane		endoplasmic reticulum membrane			endoplasmic reticulum membrane, nuclear pore	endoplasmic reticulum membrane		nuclear pore		endoplasmic reticulum membrane, nuclear pore					ribosome binding, translation elongation factor activity								ribosome binding, translation elongation factor activity
Cluster of Alcohol dehydrogenase class-3 OS=Rattus norvegicus OX=10116 GN=Adh5 PE=1 SV=2 (ADHX_RAT)	ADHX_RAT [2]				fatty acid omega-oxidation, formaldehyde catabolic process	aging						ethanol catabolic process, ethanol oxidation, fatty acid omega-oxidation, formaldehyde catabolic process										cytoplasm, cytosol					nucleus			nucleus							zinc ion binding	S-(hydroxymethyl)glutathione dehydrogenase activity, alcohol dehydrogenase (NAD) activity, alcohol dehydrogenase activity, zinc-dependent							S-(hydroxymethyl)glutathione dehydrogenase activity, alcohol dehydrogenase (NAD) activity, alcohol dehydrogenase activity, zinc-dependent, zinc ion binding
Alcohol dehydrogenase class-3 OS=Rattus norvegicus OX=10116 GN=Adh5 PE=1 SV=2	ADHX_RAT				fatty acid omega-oxidation, formaldehyde catabolic process	aging						ethanol catabolic process, ethanol oxidation, fatty acid omega-oxidation, formaldehyde catabolic process										cytoplasm, cytosol					nucleus			nucleus							zinc ion binding	S-(hydroxymethyl)glutathione dehydrogenase activity, alcohol dehydrogenase (NAD) activity, alcohol dehydrogenase activity, zinc-dependent							S-(hydroxymethyl)glutathione dehydrogenase activity, alcohol dehydrogenase (NAD) activity, alcohol dehydrogenase activity, zinc-dependent, zinc ion binding
Ac1002 OS=Rattus norvegicus OX=10116 GN=Adh4 PE=1 SV=1	Q7TQ90_RAT
Ig gamma-2A chain C region OS=Rattus norvegicus OX=10116 GN=Igg-2a PE=1 SV=1	IGG2A_RAT		B cell receptor signaling pathway, complement activation, classical pathway, positive regulation of B cell activation		B cell receptor signaling pathway, phagocytosis, engulfment, phagocytosis, recognition		phagocytosis, engulfment, phagocytosis, recognition		B cell receptor signaling pathway, complement activation, classical pathway, innate immune response	phagocytosis, engulfment, phagocytosis, recognition		complement activation, classical pathway	defense response to bacterium					B cell receptor signaling pathway, complement activation, classical pathway, defense response to bacterium, innate immune response								immunoglobulin complex, circulating		external side of plasma membrane					external side of plasma membrane				antigen binding, immunoglobulin receptor binding								antigen binding, immunoglobulin receptor binding
Lactoperoxidase OS=Rattus norvegicus OX=10116 GN=Lpo PE=4 SV=1	D4A400_RAT
Protein phosphatase 2 (Formerly 2A), regulatory subunit A (PR 65), alpha isoform, isoform CRA_a OS=Rattus norvegicus OX=10116 GN=Ppp2r1a PE=1 SV=1	Q5XI34_RAT
Alpha glucosidase 2 alpha neutral subunit (Predicted) OS=Rattus norvegicus OX=10116 GN=Ganab PE=1 SV=1	D3ZAN3_RAT
Fibromodulin OS=Rattus norvegicus OX=10116 GN=Fmod PE=2 SV=1	FMOD_RAT (+1)					odontogenesis, skin development								odontogenesis, skin development				wound healing								extracellular region
Cluster of Glutathione S-transferase Mu 2 OS=Rattus norvegicus OX=10116 GN=Gstm2 PE=1 SV=2 (GSTM2_RAT)	GSTM2_RAT [3]				glutathione metabolic process, xenobiotic catabolic process	aging						glutathione metabolic process, xenobiotic catabolic process		sensory perception of smell				response to catechin, response to genistein, response to metal ion, xenobiotic catabolic process				cytosol						plasma membrane					plasma membrane				glutathione binding, protein homodimerization activity	glutathione transferase activity							glutathione binding, glutathione transferase activity, protein homodimerization activity
Glutathione S-transferase Yb-3 OS=Rattus norvegicus OX=10116 GN=Gstm3 PE=1 SV=2	GSTM4_RAT				glutathione metabolic process							glutathione metabolic process										cytoplasm																glutathione transferase activity							glutathione transferase activity
Glutathione S-transferase Mu 2 OS=Rattus norvegicus OX=10116 GN=Gstm2 PE=1 SV=2	GSTM2_RAT				glutathione metabolic process, xenobiotic catabolic process	aging						glutathione metabolic process, xenobiotic catabolic process		sensory perception of smell				response to catechin, response to genistein, response to metal ion, response to organic cyclic compound, xenobiotic catabolic process				cytosol						plasma membrane					plasma membrane				glutathione binding, protein homodimerization activity	glutathione transferase activity							glutathione binding, glutathione transferase activity, protein homodimerization activity
Glutathione S-transferase Mu 5 OS=Rattus norvegicus OX=10116 GN=Gstm5 PE=1 SV=3	GSTM5_RAT				glutathione metabolic process							glutathione metabolic process										cytoplasm															protein homodimerization activity	glutathione transferase activity							glutathione transferase activity, protein homodimerization activity
Protein disulfide-isomerase A4 OS=Rattus norvegicus OX=10116 GN=Pdia4 PE=1 SV=2	PDIA4_RAT		cell redox homeostasis, positive regulation of protein folding		cell redox homeostasis, chaperone-mediated protein folding, protein folding, response to endoplasmic reticulum stress													response to endoplasmic reticulum stress				endoplasmic reticulum lumen, melanosome, smooth endoplasmic reticulum		endoplasmic reticulum lumen, smooth endoplasmic reticulum			endoplasmic reticulum lumen, melanosome, smooth endoplasmic reticulum					endoplasmic reticulum lumen						protein disulfide isomerase activity							protein disulfide isomerase activity
Filamin B OS=Rattus norvegicus OX=10116 GN=Flnb PE=1 SV=1	A0A0G2JXT8_RAT (+1)
LIM and SH3 domain protein 1 OS=Rattus norvegicus OX=10116 GN=Lasp1 PE=1 SV=1	LASP1_RAT						ion transport			ion transport												cortical actin cytoskeleton	cortical actin cytoskeleton				cortical actin cytoskeleton					cortical actin cytoskeleton					actin filament binding, metal ion binding								actin filament binding, ion transmembrane transporter activity, metal ion binding
Ketimine reductase mu-crystallin OS=Rattus norvegicus OX=10116 GN=Crym PE=1 SV=1	CRYM_RAT		thyroid hormone metabolic process		thyroid hormone metabolic process		mitochondrial transport			mitochondrial transport		thyroid hormone metabolic process						response to hormone, response to vitamin D				cytosol															thyroid hormone binding	thiomorpholine-carboxylate dehydrogenase activity							thiomorpholine-carboxylate dehydrogenase activity, thyroid hormone binding
Fibronectin OS=Rattus norvegicus OX=10116 GN=Fn1 PE=1 SV=2	A0A096P6L8_RAT
Cluster of Heterogeneous nuclear ribonucleoprotein H2 OS=Rattus norvegicus OX=10116 GN=Hnrnph2 PE=1 SV=1 (HNRH2_RAT)	HNRH2_RAT [3]		regulation of RNA splicing		RNA splicing, mRNA processing							RNA splicing, mRNA processing										cytosol					catalytic step 2 spliceosome, nucleoplasm, nucleus			catalytic step 2 spliceosome, nucleoplasm		catalytic step 2 spliceosome, nucleoplasm					TBP-class protein binding, single-stranded RNA binding, transcription factor binding								TBP-class protein binding, single-stranded RNA binding, transcription factor binding
Heterogeneous nuclear ribonucleoprotein F OS=Rattus norvegicus OX=10116 GN=Hnrnpf PE=1 SV=3	HNRPF_RAT		regulation of RNA splicing		RNA splicing, mRNA processing							RNA splicing, mRNA processing										cytosol					catalytic step 2 spliceosome, nucleoplasm, nucleus			catalytic step 2 spliceosome, nucleoplasm, nucleus		catalytic step 2 spliceosome, nucleoplasm					TBP-class protein binding, single-stranded RNA binding, transcription factor binding								TBP-class protein binding, single-stranded RNA binding, transcription factor binding
Heterogeneous nuclear ribonucleoprotein H OS=Rattus norvegicus OX=10116 GN=Hnrnph1 PE=1 SV=1	A0A0G2JTG7_RAT
Heterogeneous nuclear ribonucleoprotein H2 OS=Rattus norvegicus OX=10116 GN=Hnrnph2 PE=1 SV=1	HNRH2_RAT																					cytosol					nucleoplasm			nucleoplasm		nucleoplasm					RNA binding								RNA binding
Cytosolic non-specific dipeptidase OS=Rattus norvegicus OX=10116 GN=Cndp2 PE=1 SV=1	CNDP2_RAT																					cytosol					nucleoplasm			nucleoplasm		nucleoplasm					metal ion binding	alanylglutamate dipeptidase activity, carboxypeptidase activity, cytosolic dipeptidase activity, metallopeptidase activity							alanylglutamate dipeptidase activity, carboxypeptidase activity, cytosolic dipeptidase activity, metal ion binding, metallopeptidase activity
Isocitrate dehydrogenase [NADP], mitochondrial OS=Rattus norvegicus OX=10116 GN=Idh2 PE=1 SV=2	IDHP_RAT		negative regulation of glial cell migration, negative regulation of glial cell proliferation, negative regulation of matrix metallopeptidase secretion		2-oxoglutarate metabolic process, NADP biosynthetic process, NADP metabolic process, glyoxylate cycle, isocitrate metabolic process, negative regulation of glial cell migration, negative regulation of glial cell proliferation, tricarboxylic acid cycle	negative regulation of glial cell migration, negative regulation of glial cell proliferation						2-oxoglutarate metabolic process, NADP biosynthetic process, NADP metabolic process, glyoxylate cycle, isocitrate metabolic process, tricarboxylic acid cycle		negative regulation of glial cell migration, negative regulation of glial cell proliferation								cytosol, mitochondrion, peroxisome					mitochondrion, peroxisome		mitochondrion								NAD binding, magnesium ion binding	isocitrate dehydrogenase (NADP+) activity							NAD binding, isocitrate dehydrogenase (NADP+) activity, magnesium ion binding
Alpha-2-HS-glycoprotein OS=Rattus norvegicus OX=10116 GN=Ahsg PE=1 SV=2	FETUA_RAT		negative regulation of bone mineralization, negative regulation of cell growth, negative regulation of endopeptidase activity, negative regulation of insulin receptor signaling pathway, positive regulation of bone resorption, positive regulation of phagocytosis, regulation of inflammatory response		cellular response to insulin stimulus, macromolecular complex assembly	animal organ regeneration, cerebral cortex development, male gonad development								animal organ regeneration, cerebral cortex development, male gonad development		male gonad development	male gonad development	acute-phase response, cellular response to insulin stimulus								extracellular space																	cysteine-type endopeptidase inhibitor activity, kinase inhibitor activity, receptor signaling protein tyrosine kinase inhibitor activity		cysteine-type endopeptidase inhibitor activity, kinase inhibitor activity, receptor signaling protein tyrosine kinase inhibitor activity
Alpha-1B-glycoprotein OS=Rattus norvegicus OX=10116 GN=A1bg PE=2 SV=2	A1BG_RAT																									extracellular region
Methanethiol oxidase OS=Rattus norvegicus OX=10116 GN=Selenbp1 PE=1 SV=2	F1LRJ9_RAT (+1)
Immunoglobulin heavy constant mu OS=Rattus norvegicus OX=10116 GN=Ighm PE=4 SV=1	A0A0G2K9Y0_RAT (+2)
Actin-related protein 2 OS=Rattus norvegicus OX=10116 GN=Actr2 PE=2 SV=1	ARP2_RAT		Arp2/3 complex-mediated actin nucleation, positive regulation of dendritic spine morphogenesis, positive regulation of double-strand break repair via homologous recombination, positive regulation of transcription from RNA polymerase II promoter		Arp2/3 complex-mediated actin nucleation, asymmetric cell division, cellular response to interferon-gamma, cellular response to trichostatin A, cilium assembly, establishment or maintenance of cell polarity, meiotic chromosome movement towards spindle pole, meiotic cytokinesis, positive regulation of dendritic spine morphogenesis, spindle localization	positive regulation of dendritic spine morphogenesis	cytosolic transport, meiotic chromosome movement towards spindle pole		cellular response to interferon-gamma	cytosolic transport, meiotic chromosome movement towards spindle pole, spindle localization				associative learning, positive regulation of dendritic spine morphogenesis		meiotic chromosome movement towards spindle pole, meiotic cytokinesis	meiotic chromosome movement towards spindle pole, meiotic cytokinesis	cellular response to interferon-gamma, cellular response to trichostatin A, response to ethanol, response to immobilization stress				actin cap, actin cortical patch, cytosol	Arp2/3 protein complex, actin cap, actin cortical patch, podosome core				Arp2/3 protein complex, actin cap, actin cortical patch, nucleus, podosome core, site of double-strand break			nucleus		Arp2/3 protein complex, actin cap, actin cortical patch, podosome core, site of double-strand break					ATP binding, actin filament binding, cytoskeletal protein binding								ATP binding, actin filament binding, cytoskeletal protein binding, structural constituent of cytoskeleton
Zyxin OS=Rattus norvegicus OX=10116 GN=Zyx PE=1 SV=1	D4A7U1_RAT
Cluster of Keratin, type I cytoskeletal 19 OS=Rattus norvegicus OX=10116 GN=Krt19 PE=1 SV=2 (K1C19_RAT)	K1C19_RAT [9]		Notch signaling pathway		Notch signaling pathway, cell differentiation involved in embryonic placenta development, cellular response to retinoic acid, epithelial cell differentiation, intermediate filament bundle assembly, intermediate filament-based process, sarcomere organization	aging, cell differentiation involved in embryonic placenta development, epithelial cell differentiation, hair follicle morphogenesis, sarcomere organization, tongue morphogenesis								cell differentiation involved in embryonic placenta development, hair cycle, hair follicle morphogenesis, tongue morphogenesis		cell differentiation involved in embryonic placenta development	cell differentiation involved in embryonic placenta development	Notch signaling pathway, cellular response to retinoic acid, response to estrogen, response to ionizing radiation, response to zinc ion				Z disc, costamere, terminal web	intermediate filament, keratin filament, terminal web				Z disc, costamere, intermediate filament, keratin filament, nucleus, terminal web	apicolateral plasma membrane, dystrophin-associated glycoprotein complex, sarcolemma		nucleus		Z disc, costamere, intermediate filament, keratin filament, terminal web	apicolateral plasma membrane, dystrophin-associated glycoprotein complex, sarcolemma				keratin filament binding, macromolecular complex binding, scaffold protein binding								keratin filament binding, macromolecular complex binding, scaffold protein binding, structural constituent of cytoskeleton, structural constituent of muscle
Keratin, type I cytoskeletal 15 OS=Rattus norvegicus OX=10116 GN=Krt15 PE=1 SV=1	K1C15_RAT				intermediate filament-based process																		intermediate filament, keratin filament				intermediate filament, keratin filament					intermediate filament, keratin filament					scaffold protein binding								scaffold protein binding, structural constituent of cytoskeleton
Keratin, type I cytoskeletal 19 OS=Rattus norvegicus OX=10116 GN=Krt19 PE=1 SV=2	K1C19_RAT		Notch signaling pathway		Notch signaling pathway, cell differentiation involved in embryonic placenta development, sarcomere organization	cell differentiation involved in embryonic placenta development, sarcomere organization								cell differentiation involved in embryonic placenta development		cell differentiation involved in embryonic placenta development	cell differentiation involved in embryonic placenta development	Notch signaling pathway, response to estrogen				Z disc, costamere, terminal web	intermediate filament, terminal web				Z disc, costamere, intermediate filament, terminal web	apicolateral plasma membrane, dystrophin-associated glycoprotein complex, sarcolemma				Z disc, costamere, intermediate filament, terminal web	apicolateral plasma membrane, dystrophin-associated glycoprotein complex, sarcolemma				macromolecular complex binding								macromolecular complex binding, structural constituent of muscle
Keratin, type I cytoskeletal 14 OS=Rattus norvegicus OX=10116 GN=Krt14 PE=2 SV=1	K1C14_RAT				epithelial cell differentiation, intermediate filament bundle assembly	aging, epithelial cell differentiation								hair cycle				response to ionizing radiation, response to zinc ion				cytoplasm	keratin filament				keratin filament, nucleus			nucleus		keratin filament					keratin filament binding								keratin filament binding, structural molecule activity
Keratin 16 OS=Rattus norvegicus OX=10116 GN=Krt16 PE=1 SV=1	Q6IFU9_RAT
Keratin, type I cytoskeletal 27 OS=Rattus norvegicus OX=10116 GN=Krt27 PE=3 SV=1	K1C27_RAT					hair follicle morphogenesis								hair follicle morphogenesis								cytoplasm	intermediate filament				intermediate filament					intermediate filament													structural molecule activity
Keratin, type I cytoskeletal 42 OS=Rattus norvegicus OX=10116 GN=Krt42 PE=3 SV=1	K1C42_RAT																					cytoplasm	intermediate filament				intermediate filament					intermediate filament													structural molecule activity
Keratin, type I cytoskeletal 13 OS=Rattus norvegicus OX=10116 GN=Krt13 PE=3 SV=1	K1C13_RAT				cellular response to retinoic acid	tongue morphogenesis								tongue morphogenesis				cellular response to retinoic acid, response to radiation					intermediate filament				intermediate filament					intermediate filament													structural molecule activity
Keratin, type I cytoskeletal 10 OS=Rattus norvegicus OX=10116 GN=Krt10 PE=1 SV=1	A0A0G2K2V6_RAT
Keratin, type I cytoskeletal 17 OS=Rattus norvegicus OX=10116 GN=Krt17 PE=1 SV=1	A0A0G2K9Q9_RAT
Aldo-keto reductase family 1 member A1 OS=Rattus norvegicus OX=10116 GN=Akr1a1 PE=1 SV=2	AK1A1_RAT				D-glucuronate catabolic process, L-ascorbic acid biosynthetic process, aldehyde catabolic process, daunorubicin metabolic process, doxorubicin metabolic process							D-glucuronate catabolic process, L-ascorbic acid biosynthetic process, aldehyde catabolic process, daunorubicin metabolic process, doxorubicin metabolic process										cytosol						apical plasma membrane					apical plasma membrane					L-glucuronate reductase activity, alditol:NADP+ 1-oxidoreductase activity, allyl-alcohol dehydrogenase activity, glucuronolactone reductase activity, mevaldate reductase (NADPH) activity							L-glucuronate reductase activity, alditol:NADP+ 1-oxidoreductase activity, allyl-alcohol dehydrogenase activity, glucuronolactone reductase activity, mevaldate reductase (NADPH) activity
N-acetylneuraminate synthase OS=Rattus norvegicus OX=10116 GN=Nans PE=1 SV=1	B1WC26_RAT
Polypyrimidine tract-binding protein 1 OS=Rattus norvegicus OX=10116 GN=Ptbp1 PE=1 SV=1	A0A0G2JTV1_RAT (+2)
SH3 domain-binding glutamic acid-rich-like protein OS=Rattus norvegicus OX=10116 GN=Sh3bgrl PE=1 SV=1	B5DFD8_RAT
Uncharacterized protein OS=Rattus norvegicus OX=10116 PE=4 SV=2	D3ZS25_RAT (+1)
Reticulocalbin 1 OS=Rattus norvegicus OX=10116 GN=Rcn1 PE=1 SV=1	D3ZUB0_RAT
Cluster of Catenin (Cadherin associated protein), alpha 1 OS=Rattus norvegicus OX=10116 GN=Ctnna1 PE=1 SV=1 (Q5U302_RAT)	Q5U302_RAT [2]
Catenin (Cadherin associated protein), alpha 1 OS=Rattus norvegicus OX=10116 GN=Ctnna1 PE=1 SV=1	Q5U302_RAT
Catenin alpha 1 OS=Rattus norvegicus OX=10116 GN=Ctnna1 PE=1 SV=1	A0A0G2JYF7_RAT
Antisecretory factor OS=Rattus norvegicus OX=10116 GN=Psmd4 PE=1 SV=1	O88321_RAT
Serine/threonine-protein phosphatase 2A activator OS=Rattus norvegicus OX=10116 GN=Ptpa PE=1 SV=1	B2RYQ2_RAT
T-complex protein 1 subunit eta OS=Rattus norvegicus OX=10116 GN=Cct7 PE=1 SV=1	D4AC23_RAT
Polyadenylate-binding protein OS=Rattus norvegicus OX=10116 GN=RGD1562451 PE=3 SV=3	D3ZSR2_RAT (+1)
60S ribosomal protein L23 OS=Rattus norvegicus OX=10116 GN=Rpl23 PE=2 SV=1	RL23_RAT		negative regulation of cell cycle arrest, negative regulation of protein ubiquitination involved in ubiquitin-dependent protein catabolic process, negative regulation of transcription from RNA polymerase II promoter, positive regulation of cell cycle arrest, positive regulation of cell proliferation, positive regulation of gene expression, positive regulation of signal transduction by p53 class m…		cellular response to actinomycin D, protein-DNA complex disassembly, translation							translation						cellular response to actinomycin D				cytosolic large ribosomal subunit, ribosome					cytosolic large ribosomal subunit, nucleolus, nucleoplasm, ribosome			nucleolus, nucleoplasm		cytosolic large ribosomal subunit, nucleolus, nucleoplasm		cytosolic large ribosomal subunit, ribosome			large ribosomal subunit rRNA binding, transcription coactivator binding, ubiquitin protein ligase binding						ubiquitin ligase inhibitor activity		large ribosomal subunit rRNA binding, structural constituent of ribosome, transcription coactivator binding, ubiquitin ligase inhibitor activity, ubiquitin protein ligase binding
Annexin OS=Rattus norvegicus OX=10116 GN=Anxa4 PE=1 SV=1	Q5U362_RAT
Calpain-1 catalytic subunit OS=Rattus norvegicus OX=10116 GN=Capn1 PE=1 SV=1	CAN1_RAT (+1)		negative regulation of NIK/NF-kappaB signaling, negative regulation of actin filament polymerization, positive regulation of cardiac muscle cell apoptotic process, positive regulation of leukocyte tethering or rolling, positive regulation of vascular permeability, regulation of catalytic activity		cellular response to hydrogen peroxide, negative regulation of actin filament polymerization, receptor catabolic process	aging, brain development, mammary gland involution						protein autoprocessing, receptor catabolic process, self proteolysis		brain development, mammary gland involution, positive regulation of vascular permeability				cellular response to hydrogen peroxide, response to angiotensin, response to arsenic-containing substance				cytosol, lysosome, mitochondrion					lysosome, mitochondrion	plasma membrane	mitochondrion				plasma membrane				calcium ion binding, cytoskeletal protein binding, enzyme binding	calcium-dependent cysteine-type endopeptidase activity							calcium ion binding, calcium-dependent cysteine-type endopeptidase activity, cytoskeletal protein binding, enzyme binding
Placenta-expressed transcript 1 protein OS=Rattus norvegicus OX=10116 GN=Plet1 PE=2 SV=1	PLET1_RAT		negative regulation of cell-matrix adhesion, positive regulation of cell migration		cell differentiation, wound healing, spreading of epidermal cells	cell differentiation, wound healing, spreading of epidermal cells				wound healing, spreading of epidermal cells	wound healing, spreading of epidermal cells							wound healing, spreading of epidermal cells										anchored component of membrane, apical plasma membrane, external side of plasma membrane					apical plasma membrane, external side of plasma membrane
Proteasome subunit alpha type-4 OS=Rattus norvegicus OX=10116 GN=Psma4 PE=1 SV=1	PSA4_RAT				proteasomal protein catabolic process, proteasomal ubiquitin-independent protein catabolic process, proteasome-mediated ubiquitin-dependent protein catabolic process							proteasomal protein catabolic process, proteasomal ubiquitin-independent protein catabolic process, proteasome-mediated ubiquitin-dependent protein catabolic process										P-body, cytosol					P-body, nucleus			nucleus								endopeptidase activity, threonine-type endopeptidase activity							endopeptidase activity, threonine-type endopeptidase activity
Nucleobindin-1 OS=Rattus norvegicus OX=10116 GN=Nucb1 PE=1 SV=1	NUCB1_RAT		regulation of protein targeting, small GTPase mediated signal transduction		small GTPase mediated signal transduction													response to cisplatin, small GTPase mediated signal transduction			Golgi cisterna membrane, Golgi-associated vesicle, extrinsic component of Golgi membrane, lumenal side of Golgi membrane, trans-Golgi network	Golgi apparatus, Golgi cisterna membrane, Golgi-associated vesicle, cytoplasm, early endosome, endoplasmic reticulum-Golgi intermediate compartment, extrinsic component of Golgi membrane, lumenal side of Golgi membrane, rough endoplasmic reticulum, trans-Golgi network		rough endoplasmic reticulum	early endosome	extracellular region, extracellular space	Golgi apparatus, Golgi cisterna membrane, Golgi-associated vesicle, cis-Golgi network, early endosome, endoplasmic reticulum-Golgi intermediate compartment, extrinsic component of Golgi membrane, lumenal side of Golgi membrane, nucleus, rough endoplasmic reticulum, trans-Golgi network	Golgi cisterna membrane, extrinsic component of Golgi membrane, lumenal side of Golgi membrane		nucleus	Golgi cisterna membrane, extrinsic component of Golgi membrane, lumenal side of Golgi membrane	Golgi cisterna membrane, Golgi-associated vesicle, extrinsic component of Golgi membrane, lumenal side of Golgi membrane, trans-Golgi network					DNA binding, G-protein alpha-subunit binding, calcium ion binding								DNA binding, G-protein alpha-subunit binding, calcium ion binding, guanyl-nucleotide exchange factor activity
Cellular retinoic acid-binding protein 1 OS=Rattus norvegicus OX=10116 GN=Crabp1 PE=1 SV=3	RABP1_RAT		retinoic acid catabolic process		retinoic acid catabolic process							retinoic acid catabolic process										cytosol															retinal binding, retinoic acid binding, retinol binding								retinal binding, retinoic acid binding, retinol binding
Coronin-1A OS=Rattus norvegicus OX=10116 GN=Coro1a PE=1 SV=3	COR1A_RAT	cell-substrate adhesion	T cell homeostasis, homeostasis of number of cells within a tissue, negative regulation of actin nucleation, negative regulation of neuron apoptotic process, negative regulation of vesicle fusion, nerve growth factor signaling pathway, positive regulation of T cell proliferation, positive regulation of cell migration, regulation of cell shape, regulation of release of sequestered calcium ion into…	natural killer cell degranulation	T cell differentiation, actin filament organization, cellular response to interleukin-4, leukocyte chemotaxis, natural killer cell degranulation, negative regulation of actin nucleation, nerve growth factor signaling pathway, phagolysosome assembly, uropod organization	T cell differentiation	calcium ion transport, early endosome to recycling endosome transport, natural killer cell degranulation, phagolysosome assembly		T cell differentiation, T cell homeostasis, leukocyte chemotaxis, natural killer cell degranulation	calcium ion transport, early endosome to recycling endosome transport, leukocyte chemotaxis, natural killer cell degranulation, phagolysosome assembly	leukocyte chemotaxis, positive chemotaxis			T cell differentiation, homeostasis of number of cells within a tissue				cellular response to interleukin-4, leukocyte chemotaxis, natural killer cell degranulation, nerve growth factor signaling pathway, positive chemotaxis				cortical actin cytoskeleton, cytosol, early endosome, phagocytic vesicle membrane	actin filament, cortical actin cytoskeleton		early endosome		actin filament, cortical actin cytoskeleton, early endosome, phagocytic vesicle membrane	immunological synapse, phagocytic cup, phagocytic vesicle membrane			phagocytic vesicle membrane	actin filament, cortical actin cytoskeleton, phagocytic vesicle membrane	immunological synapse, phagocytic cup				actin filament binding, actin monomer binding, myosin heavy chain binding, phosphatidylinositol 3-kinase binding, protein C-terminus binding, protein homodimerization activity								actin filament binding, actin monomer binding, myosin heavy chain binding, phosphatidylinositol 3-kinase binding, protein C-terminus binding, protein homodimerization activity
NSFL1 cofactor p47 OS=Rattus norvegicus OX=10116 GN=Nsfl1c PE=1 SV=1	A0A0G2K911_RAT
Collagen alpha-1(I) chain OS=Rattus norvegicus OX=10116 GN=Col1a1 PE=1 SV=5	CO1A1_RAT		collagen-activated tyrosine kinase receptor signaling pathway, negative regulation of cell-substrate adhesion, positive regulation of canonical Wnt signaling pathway, positive regulation of cell migration, positive regulation of epithelial to mesenchymal transition, positive regulation of transcription, DNA-templated		cellular response to amino acid stimulus, cellular response to epidermal growth factor stimulus, cellular response to fibroblast growth factor stimulus, cellular response to fluoride, cellular response to mechanical stimulus, cellular response to retinoic acid, cellular response to transforming growth factor beta stimulus, cellular response to tumor necrosis factor, cellular response to vitamin E…	blood vessel development, bone trabecula formation, cartilage development involved in endochondral bone morphogenesis, embryonic skeletal system development, endochondral ossification, face morphogenesis, osteoblast differentiation, skeletal system development, skin development, skin morphogenesis, tooth eruption, tooth mineralization	protein transport			protein localization to nucleus, protein transport		collagen biosynthetic process		blood vessel development, bone trabecula formation, cartilage development involved in endochondral bone morphogenesis, collagen biosynthetic process, embryonic skeletal system development, endochondral ossification, intramembranous ossification, ossification, osteoblast differentiation, sensory perception of sound, skeletal system development, skin development, skin morphogenesis, tooth eruption,…				cellular response to amino acid stimulus, cellular response to epidermal growth factor stimulus, cellular response to fibroblast growth factor stimulus, cellular response to fluoride, cellular response to mechanical stimulus, cellular response to retinoic acid, cellular response to transforming growth factor beta stimulus, cellular response to tumor necrosis factor, cellular response to vitamin E…			Golgi apparatus	Golgi apparatus, cytoplasm, endoplasmic reticulum, secretory granule		endoplasmic reticulum		collagen type I trimer, extracellular matrix, extracellular space	Golgi apparatus, endoplasmic reticulum, secretory granule										identical protein binding, metal ion binding, platelet-derived growth factor binding, protease binding								extracellular matrix structural constituent, identical protein binding, metal ion binding, platelet-derived growth factor binding, protease binding
Chaperonin containing Tcp1, subunit 6A (Zeta 1) OS=Rattus norvegicus OX=10116 GN=Cct6a PE=1 SV=1	Q3MHS9_RAT
Nucleosome assembly protein 1-like 4 OS=Rattus norvegicus OX=10116 GN=Nap1l4 PE=1 SV=1	A0A0H2UHZ2_RAT (+1)
Bifunctional purine biosynthesis protein PURH OS=Rattus norvegicus OX=10116 GN=Atic PE=1 SV=2	PUR9_RAT				'de novo' IMP biosynthetic process, cellular response to interleukin-7, cobalamin metabolic process, dihydrofolate metabolic process, nucleoside metabolic process, ribonucleotide metabolic process, tetrahydrofolate biosynthetic process	animal organ regeneration, brainstem development, cerebellum development, cerebral cortex development						'de novo' IMP biosynthetic process, cobalamin metabolic process, dihydrofolate metabolic process, nucleoside metabolic process, ribonucleotide metabolic process, tetrahydrofolate biosynthetic process		animal organ regeneration, cerebellum development, cerebral cortex development				cellular response to interleukin-7, response to inorganic substance				cytosol						plasma membrane					plasma membrane				protein homodimerization activity	IMP cyclohydrolase activity, phosphoribosylaminoimidazolecarboxamide formyltransferase activity							IMP cyclohydrolase activity, phosphoribosylaminoimidazolecarboxamide formyltransferase activity, protein homodimerization activity
Lumican OS=Rattus norvegicus OX=10116 GN=Lum PE=1 SV=1	LUM_RAT		positive regulation of transcription from RNA polymerase II promoter, positive regulation of transforming growth factor beta1 production		collagen fibril organization	cartilage development								cartilage development, visual perception				response to growth factor, response to organic cyclic compound								extracellular matrix, fibrillar collagen trimer											collagen binding								collagen binding
Carboxypeptidase OS=Rattus norvegicus OX=10116 GN=Ctsa PE=1 SV=1	Q6AYS3_RAT
Destrin OS=Rattus norvegicus OX=10116 GN=Dstn PE=1 SV=3	DEST_RAT		positive regulation of actin filament depolymerization		actin filament depolymerization, actin filament severing, positive regulation of actin filament depolymerization																		actin cytoskeleton				actin cytoskeleton										actin filament binding								actin filament binding
26S proteasome regulatory subunit 6A OS=Rattus norvegicus OX=10116 GN=Psmc3 PE=1 SV=1	PRS6A_RAT (+1)		positive regulation of RNA polymerase II transcriptional preinitiation complex assembly									protein catabolic process										P-body, perinuclear region of cytoplasm					P-body, nucleus			nucleus							ATP binding	hydrolase activity							ATP binding, hydrolase activity
Peptidylprolyl isomerase OS=Rattus norvegicus OX=10116 GN=Fkbp10 PE=1 SV=1	Q5U2V1_RAT
Drebrin-like protein OS=Rattus norvegicus OX=10116 GN=Dbnl PE=1 SV=1	DBNL_RAT		Rac protein signal transduction, positive regulation of axon extension, positive regulation of dendritic spine morphogenesis, regulation of actin filament polymerization		Rac protein signal transduction, neuron projection morphogenesis, podosome assembly, positive regulation of axon extension, positive regulation of dendritic spine morphogenesis, postsynaptic actin cytoskeleton organization, regulation of actin filament polymerization, ruffle assembly, synapse assembly	neuron projection morphogenesis, positive regulation of axon extension, positive regulation of dendritic spine morphogenesis, synapse assembly	receptor-mediated endocytosis		adaptive immune response	receptor-mediated endocytosis				neuron projection morphogenesis, positive regulation of axon extension, positive regulation of dendritic spine morphogenesis, synapse assembly				Rac protein signal transduction, adaptive immune response			Golgi membrane	Golgi membrane, cell cortex, clathrin-coated vesicle membrane, cortical actin cytoskeleton, cytosol, early endosome	cortical actin cytoskeleton, podosome		early endosome		Golgi membrane, clathrin-coated vesicle membrane, cortical actin cytoskeleton, early endosome, podosome	Golgi membrane, clathrin-coated vesicle membrane, plasma membrane, postsynaptic membrane			Golgi membrane, clathrin-coated vesicle membrane	Golgi membrane, clathrin-coated vesicle membrane, cortical actin cytoskeleton, podosome	plasma membrane, postsynaptic membrane				actin filament binding, protein C-terminus binding, protein domain specific binding								actin filament binding, protein C-terminus binding, protein domain specific binding
Sushi domain-containing 2 OS=Rattus norvegicus OX=10116 GN=Susd2 PE=1 SV=1	A0A0G2K0Q8_RAT (+1)
Proteasome subunit beta OS=Rattus norvegicus OX=10116 GN=LOC100360846 PE=3 SV=1	A0A0G2JSL0_RAT (+1)
Dihydropteridine reductase OS=Rattus norvegicus OX=10116 GN=Qdpr PE=1 SV=1	DHPR_RAT				L-phenylalanine catabolic process, cellular response to drug, tetrahydrobiopterin biosynthetic process	liver development						L-phenylalanine catabolic process, tetrahydrobiopterin biosynthetic process		liver development				cellular response to drug, response to aluminum ion, response to glucagon, response to lead ion				cytoplasm, cytosol															NADH binding, NADPH binding, protein homodimerization activity	6,7-dihydropteridine reductase activity							6,7-dihydropteridine reductase activity, NADH binding, NADPH binding, protein homodimerization activity
Peptidyl arginine deiminase, type II, isoform CRA_a OS=Rattus norvegicus OX=10116 GN=Padi2 PE=4 SV=2	F1LPA6_RAT (+1)
Scinderin OS=Rattus norvegicus OX=10116 GN=Scin PE=1 SV=1	E9PU64_RAT
Phosphatidylethanolamine-binding protein 1 OS=Rattus norvegicus OX=10116 GN=Pebp1 PE=1 SV=3	PEBP1_RAT		MAPK cascade, negative regulation of MAPK cascade, negative regulation of protein phosphorylation, positive regulation of acetylcholine metabolic process, positive regulation of cAMP-mediated signaling, positive regulation of mitotic nuclear division, regulation of neurotransmitter levels, regulation of the force of heart contraction		MAPK cascade, sperm capacitation, spermatid development	aging, hippocampus development, sperm capacitation, spermatid development						MAPK cascade	sperm capacitation	hippocampus development, sperm capacitation, spermatid development		sperm capacitation, spermatid development	sperm capacitation, spermatid development	MAPK cascade, response to activity, response to cAMP, response to calcium ion, response to corticosterone, response to drug, response to electrical stimulus, response to ethanol, response to heat, response to organic cyclic compound, response to organic substance, response to oxidative stress, response to toxic substance, response to wounding			Golgi apparatus	Golgi apparatus, mitochondrial outer membrane, mitochondrion, rough endoplasmic reticulum, synaptic vesicle		rough endoplasmic reticulum		extracellular space	Golgi apparatus, mitochondrial outer membrane, mitochondrion, rough endoplasmic reticulum, synaptic vesicle	mitochondrial outer membrane	mitochondrial outer membrane		mitochondrial outer membrane	mitochondrial outer membrane					ATP binding, lipid binding, mitogen-activated protein kinase binding, receptor serine/threonine kinase binding						serine-type endopeptidase inhibitor activity		ATP binding, lipid binding, mitogen-activated protein kinase binding, receptor serine/threonine kinase binding, serine-type endopeptidase inhibitor activity
Proteasome subunit beta OS=Rattus norvegicus OX=10116 GN=Psmb4 PE=1 SV=2	G3V8U9_RAT
Hsc70-interacting protein OS=Rattus norvegicus OX=10116 GN=St13 PE=1 SV=1	F10A1_RAT		negative regulation of protein refolding		chaperone mediated protein folding requiring cofactor, protein homooligomerization, protein homotetramerization								response to bacterium					response to bacterium				cytosol															Hsp70 protein binding, chaperone binding, dATP binding, identical protein binding, macromolecular complex binding, protein dimerization activity, protein domain specific binding, unfolded protein binding								Hsp70 protein binding, chaperone binding, dATP binding, identical protein binding, macromolecular complex binding, protein dimerization activity, protein domain specific binding, unfolded protein binding
Actin-related protein 2/3 complex subunit 1B OS=Rattus norvegicus OX=10116 GN=Arpc1b PE=1 SV=3	ARC1B_RAT		Arp2/3 complex-mediated actin nucleation		Arp2/3 complex-mediated actin nucleation													response to estradiol, response to estrogen				cytoplasm	Arp2/3 protein complex				Arp2/3 protein complex, nucleus			nucleus		Arp2/3 protein complex					actin filament binding, macromolecular complex binding								actin filament binding, macromolecular complex binding, structural constituent of cytoskeleton
Group specific component OS=Rattus norvegicus OX=10116 GN=Gc PE=1 SV=1	Q68FY4_RAT (+1)
Annexin OS=Rattus norvegicus OX=10116 GN=Anxa7 PE=1 SV=1	Q6IRJ7_RAT
Lamina-associated polypeptide 2, isoform beta OS=Rattus norvegicus OX=10116 GN=Tmpo PE=1 SV=3	LAP2_RAT		regulation of transcription, DNA-templated		nuclear envelope reassembly																						chromatin, nuclear envelope, nuclear inner membrane, nucleus	integral component of membrane, nuclear inner membrane		nuclear envelope, nuclear inner membrane, nucleus	nuclear inner membrane	chromatin, nuclear envelope, nuclear inner membrane					DNA binding, identical protein binding, lamin binding								DNA binding, identical protein binding, lamin binding
40S ribosomal protein SA OS=Rattus norvegicus OX=10116 GN=Rpsa PE=1 SV=3	RSSA_RAT	cell-cell adhesion			cytoplasmic translation, epithelial cell differentiation, ribosomal small subunit assembly	epithelial cell differentiation						cytoplasmic translation										cytosol, cytosolic small ribosomal subunit				basement membrane	cytosolic small ribosomal subunit, nucleus	membrane, plasma membrane		nucleus		cytosolic small ribosomal subunit	plasma membrane	cytosolic small ribosomal subunit			laminin binding								laminin binding, laminin receptor activity, structural constituent of ribosome	laminin receptor activity
Eukaryotic translation initiation factor 4H OS=Rattus norvegicus OX=10116 GN=Eif4h PE=1 SV=1	IF4H_RAT					developmental growth		developmental growth					sexual reproduction			sexual reproduction	sexual reproduction					perinuclear region of cytoplasm															translation initiation factor activity								translation initiation factor activity
Microtubule-associated protein OS=Rattus norvegicus OX=10116 GN=Map4 PE=1 SV=1	A0A0G2JW88_RAT
Cluster of Cofilin-1 OS=Rattus norvegicus OX=10116 GN=Cfl1 PE=1 SV=3 (COF1_RAT)	COF1_RAT [2]		negative regulation of actin filament bundle assembly, negative regulation of actin filament depolymerization, negative regulation of cell adhesion, negative regulation of cell motility, negative regulation of cell size, negative regulation of dendritic spine maintenance, negative regulation of lamellipodium assembly, negative regulation of postsynaptic density organization, negative regulation o…		actin filament fragmentation, cell projection organization, cellular response to epidermal growth factor stimulus, cellular response to ether, cellular response to hydrogen peroxide, cellular response to insulin-like growth factor stimulus, cellular response to interleukin-1, cellular response to interleukin-6, cellular response to tumor necrosis factor, cytoskeleton organization, establishment o…	hippocampus development, neural crest cell migration, neural fold formation, positive regulation of dendritic spine development, regulation of dendritic spine morphogenesis	protein import into nucleus			neural crest cell migration, protein import into nucleus	neural crest cell migration	protein phosphorylation	positive regulation by host of viral process, response to virus	hippocampus development, neural crest cell migration, neural fold formation, positive regulation of dendritic spine development, regulation of dendritic spine morphogenesis				cellular response to epidermal growth factor stimulus, cellular response to ether, cellular response to hydrogen peroxide, cellular response to insulin-like growth factor stimulus, cellular response to interleukin-1, cellular response to interleukin-6, cellular response to tumor necrosis factor, response to activity, response to amino acid, response to organic cyclic compound, response to virus		response to virus		cortical actin cytoskeleton, mitochondrial membrane	cofilin-actin rod, cortical actin cytoskeleton				cofilin-actin rod, cortical actin cytoskeleton, mitochondrial membrane, nuclear matrix	lamellipodium membrane, mitochondrial membrane, ruffle membrane, synaptic membrane	mitochondrial membrane	nuclear matrix	mitochondrial membrane	cofilin-actin rod, cortical actin cytoskeleton, mitochondrial membrane, nuclear matrix	lamellipodium membrane, ruffle membrane, synaptic membrane				actin filament binding, phosphatidylinositol bisphosphate binding, protein phosphatase binding, receptor binding								actin filament binding, phosphatidylinositol bisphosphate binding, protein phosphatase binding, receptor binding
Cofilin 2 OS=Rattus norvegicus OX=10116 GN=Cfl2 PE=1 SV=1	M0RC65_RAT
Cofilin-1 OS=Rattus norvegicus OX=10116 GN=Cfl1 PE=1 SV=3	COF1_RAT		negative regulation of actin filament bundle assembly, negative regulation of actin filament depolymerization, negative regulation of cell adhesion, negative regulation of cell motility, negative regulation of cell size, negative regulation of dendritic spine maintenance, negative regulation of lamellipodium assembly, negative regulation of postsynaptic density organization, negative regulation o…		actin filament fragmentation, cell projection organization, cellular response to epidermal growth factor stimulus, cellular response to ether, cellular response to hydrogen peroxide, cellular response to insulin-like growth factor stimulus, cellular response to interleukin-1, cellular response to interleukin-6, cellular response to tumor necrosis factor, cytoskeleton organization, establishment o…	hippocampus development, neural crest cell migration, neural fold formation, positive regulation of dendritic spine development, regulation of dendritic spine morphogenesis	protein import into nucleus			neural crest cell migration, protein import into nucleus	neural crest cell migration	protein phosphorylation	positive regulation by host of viral process, response to virus	hippocampus development, neural crest cell migration, neural fold formation, positive regulation of dendritic spine development, regulation of dendritic spine morphogenesis				cellular response to epidermal growth factor stimulus, cellular response to ether, cellular response to hydrogen peroxide, cellular response to insulin-like growth factor stimulus, cellular response to interleukin-1, cellular response to interleukin-6, cellular response to tumor necrosis factor, response to activity, response to amino acid, response to organic cyclic compound, response to virus		response to virus		cortical actin cytoskeleton, mitochondrial membrane	cofilin-actin rod, cortical actin cytoskeleton				cofilin-actin rod, cortical actin cytoskeleton, mitochondrial membrane, nuclear matrix	lamellipodium membrane, mitochondrial membrane, ruffle membrane, synaptic membrane	mitochondrial membrane	nuclear matrix	mitochondrial membrane	cofilin-actin rod, cortical actin cytoskeleton, mitochondrial membrane, nuclear matrix	lamellipodium membrane, ruffle membrane, synaptic membrane				actin filament binding, phosphatidylinositol bisphosphate binding, protein phosphatase binding, receptor binding								actin filament binding, phosphatidylinositol bisphosphate binding, protein phosphatase binding, receptor binding
RCG43947 OS=Rattus norvegicus OX=10116 GN=Txndc5 PE=1 SV=1	D3ZZC1_RAT
Coactosin-like protein OS=Rattus norvegicus OX=10116 GN=Cotl1 PE=1 SV=1	COTL1_RAT		regulation of actin filament polymerization		regulation of actin filament polymerization								defense response to fungus					defense response to fungus				cortical actin cytoskeleton	cortical actin cytoskeleton				cortical actin cytoskeleton, nucleus	plasma membrane		nucleus		cortical actin cytoskeleton	plasma membrane				actin filament binding, enzyme binding								actin filament binding, enzyme binding
Ribose 5-phosphate isomerase A OS=Rattus norvegicus OX=10116 GN=Rpia PE=1 SV=1	D4A7L6_RAT
Cluster of Ubiquitin-conjugating enzyme E2 V1 OS=Rattus norvegicus OX=10116 GN=LOC100912618 PE=1 SV=1 (D3ZFY8_RAT)	D3ZFY8_RAT [3]
Ubiquitin-conjugating enzyme E2 V1 OS=Rattus norvegicus OX=10116 GN=LOC100912618 PE=1 SV=1	D3ZFY8_RAT
Ubiquitin-conjugating enzyme E2 variant 2 OS=Rattus norvegicus OX=10116 GN=Ube2v2 PE=1 SV=1	A0A0G2JU07_RAT (+1)
Adenylate kinase 2, mitochondrial OS=Rattus norvegicus OX=10116 GN=Ak2 PE=1 SV=1	A0A0G2JSG6_RAT (+1)
Isopentenyl-diphosphate Delta-isomerase 1 OS=Rattus norvegicus OX=10116 GN=Idi1 PE=2 SV=2	IDI1_RAT				dimethylallyl diphosphate biosynthetic process, isopentenyl diphosphate biosynthetic process, isoprenoid biosynthetic process							cholesterol biosynthetic process, dimethylallyl diphosphate biosynthetic process, isopentenyl diphosphate biosynthetic process, isoprenoid biosynthetic process						response to stilbenoid				peroxisome					peroxisome										magnesium ion binding, manganese ion binding	hydrolase activity, isopentenyl-diphosphate delta-isomerase activity							hydrolase activity, isopentenyl-diphosphate delta-isomerase activity, magnesium ion binding, manganese ion binding
Complement factor B OS=Rattus norvegicus OX=10116 GN=Cfb PE=1 SV=1	G3V615_RAT
Endoplasmic reticulum chaperone BiP OS=Rattus norvegicus OX=10116 GN=Hspa5 PE=1 SV=1	BIP_RAT		ER overload response, IRE1-mediated unfolded protein response, endoplasmic reticulum unfolded protein response, maintenance of protein localization in endoplasmic reticulum, negative regulation of IRE1-mediated unfolded protein response, negative regulation of apoptotic process, negative regulation of protein homodimerization activity, negative regulation of transforming growth factor beta recept…		ER overload response, IRE1-mediated unfolded protein response, cellular response to antibiotic, cellular response to cAMP, cellular response to calcium ion, cellular response to drug, cellular response to gamma radiation, cellular response to glucose starvation, cellular response to heat, cellular response to interleukin-4, cellular response to manganese ion, cellular response to nerve growth fac…	cerebellar Purkinje cell layer development, cerebellum structural organization, luteolysis, neuron differentiation, positive regulation of neuron projection development	posttranslational protein targeting to membrane, translocation, toxin transport			maintenance of protein localization in endoplasmic reticulum, posttranslational protein targeting to membrane, translocation, toxin transport		proteolysis involved in cellular protein catabolic process, ubiquitin-dependent ERAD pathway		cerebellar Purkinje cell layer development, cerebellum structural organization, luteolysis, neuron differentiation, positive regulation of neuron projection development		luteolysis	luteolysis	ER overload response, IRE1-mediated unfolded protein response, cellular response to antibiotic, cellular response to cAMP, cellular response to calcium ion, cellular response to drug, cellular response to gamma radiation, cellular response to glucose starvation, cellular response to heat, cellular response to interleukin-4, cellular response to manganese ion, cellular response to nerve growth fac…	luteolysis			cytoplasm, cytosol, endoplasmic reticulum chaperone complex, endoplasmic reticulum lumen, endoplasmic reticulum membrane, endoplasmic reticulum-Golgi intermediate compartment, integral component of endoplasmic reticulum membrane, mitochondrion, smooth endoplasmic reticulum		endoplasmic reticulum chaperone complex, endoplasmic reticulum lumen, endoplasmic reticulum membrane, integral component of endoplasmic reticulum membrane, smooth endoplasmic reticulum			COP9 signalosome, endoplasmic reticulum chaperone complex, endoplasmic reticulum lumen, endoplasmic reticulum membrane, endoplasmic reticulum-Golgi intermediate compartment, integral component of endoplasmic reticulum membrane, mitochondrion, nucleus, smooth endoplasmic reticulum	endoplasmic reticulum membrane, integral component of endoplasmic reticulum membrane, plasma membrane	mitochondrion	COP9 signalosome		COP9 signalosome, endoplasmic reticulum chaperone complex, endoplasmic reticulum lumen, endoplasmic reticulum membrane, integral component of endoplasmic reticulum membrane	plasma membrane				ATP binding, heat shock protein binding, misfolded protein binding, protein binding involved in protein folding, protein domain specific binding, ribosome binding, ubiquitin protein ligase binding, unfolded protein binding	ATPase activity, coupled							ATP binding, ATPase activity, coupled, heat shock protein binding, misfolded protein binding, protein binding involved in protein folding, protein domain specific binding, ribosome binding, ubiquitin protein ligase binding, unfolded protein binding
Hypoxanthine-guanine phosphoribosyltransferase OS=Rattus norvegicus OX=10116 GN=Hprt1 PE=1 SV=1	HPRT_RAT				GMP catabolic process, GMP salvage, IMP metabolic process, IMP salvage, adenine salvage, cellular response to insulin stimulus, guanine salvage, hypoxanthine metabolic process, hypoxanthine salvage, purine ribonucleoside salvage	brain development						GMP catabolic process, GMP salvage, IMP metabolic process, IMP salvage, adenine salvage, guanine salvage, hypoxanthine metabolic process, hypoxanthine salvage, purine ribonucleoside salvage	spermatogenesis	brain development, spermatogenesis		spermatogenesis	spermatogenesis	cellular response to insulin stimulus				cytoplasm															magnesium ion binding, nucleotide binding	guanine phosphoribosyltransferase activity, hypoxanthine phosphoribosyltransferase activity							guanine phosphoribosyltransferase activity, hypoxanthine phosphoribosyltransferase activity, magnesium ion binding, nucleotide binding
Keratin, type I cytoskeletal 18 OS=Rattus norvegicus OX=10116 GN=Krt18 PE=1 SV=3	K1C18_RAT		extrinsic apoptotic signaling pathway, negative regulation of apoptotic process, tumor necrosis factor-mediated signaling pathway		Golgi to plasma membrane CFTR protein transport, extrinsic apoptotic signaling pathway, hepatocyte apoptotic process, intermediate filament cytoskeleton organization, tumor necrosis factor-mediated signaling pathway		Golgi to plasma membrane CFTR protein transport			Golgi to plasma membrane CFTR protein transport								extrinsic apoptotic signaling pathway, tumor necrosis factor-mediated signaling pathway				centriolar satellite, cytosol	centriolar satellite, keratin filament				centriolar satellite, keratin filament, nuclear matrix, nucleolus			nuclear matrix, nucleolus		centriolar satellite, keratin filament, nuclear matrix, nucleolus					scaffold protein binding								scaffold protein binding, structural molecule activity
Annexin A3 OS=Rattus norvegicus OX=10116 GN=Anxa3 PE=1 SV=4	ANXA3_RAT		positive regulation of DNA metabolic process, positive regulation of angiogenesis, positive regulation of endothelial cell migration, positive regulation of sequence-specific DNA binding transcription factor activity		neutrophil degranulation	animal organ regeneration, hippocampus development	neutrophil degranulation, phagocytosis		neutrophil degranulation	neutrophil degranulation, phagocytosis			defense response to bacterium	animal organ regeneration, hippocampus development				defense response to bacterium, neutrophil degranulation, response to glucocorticoid, response to growth factor				cytosol, phagocytic vesicle membrane, specific granule					phagocytic vesicle membrane, specific granule	phagocytic vesicle membrane, plasma membrane			phagocytic vesicle membrane	phagocytic vesicle membrane	plasma membrane				calcium ion binding, calcium-dependent phospholipid binding, calcium-dependent protein binding						phospholipase A2 inhibitor activity		calcium ion binding, calcium-dependent phospholipid binding, calcium-dependent protein binding, phospholipase A2 inhibitor activity
Cluster of Lamin-B1 OS=Rattus norvegicus OX=10116 GN=Lmnb1 PE=1 SV=1 (G3V7U4_RAT)	G3V7U4_RAT [3]				apoptotic process, cellular response to corticosterone stimulus, cellular response to monosodium L-glutamate, cellular response to organic cyclic compound, neurogenesis	neurogenesis								neurogenesis				cellular response to corticosterone stimulus, cellular response to monosodium L-glutamate, cellular response to organic cyclic compound, response to antibiotic, response to drug				cytoplasm	intermediate filament				intermediate filament, nuclear envelope, nuclear inner membrane, nuclear lamina, nuclear matrix, nuclear membrane, nucleus	nuclear inner membrane, nuclear membrane		nuclear envelope, nuclear inner membrane, nuclear lamina, nuclear matrix, nuclear membrane	nuclear inner membrane, nuclear membrane	intermediate filament, nuclear envelope, nuclear inner membrane, nuclear lamina, nuclear matrix, nuclear membrane
Lamin-B1 OS=Rattus norvegicus OX=10116 GN=Lmnb1 PE=1 SV=3	LMNB1_RAT				apoptotic process, cellular response to corticosterone stimulus, cellular response to monosodium L-glutamate, cellular response to organic cyclic compound, neurogenesis	neurogenesis								neurogenesis				cellular response to corticosterone stimulus, cellular response to monosodium L-glutamate, cellular response to organic cyclic compound, response to antibiotic, response to drug				cytoplasm	intermediate filament				intermediate filament, nuclear envelope, nuclear inner membrane, nuclear lamina, nuclear matrix, nuclear membrane, nucleus	nuclear inner membrane, nuclear membrane		nuclear envelope, nuclear inner membrane, nuclear lamina, nuclear matrix, nuclear membrane	nuclear inner membrane, nuclear membrane	intermediate filament, nuclear envelope, nuclear inner membrane, nuclear lamina, nuclear matrix, nuclear membrane
Lamin-B1 OS=Rattus norvegicus OX=10116 GN=Lmnb1 PE=1 SV=1	G3V7U4_RAT
Lamin B2 OS=Rattus norvegicus OX=10116 GN=Lmnb2 PE=1 SV=2	D3ZLC1_RAT
Hemopexin OS=Rattus norvegicus OX=10116 GN=Hpx PE=1 SV=3	HEMO_RAT		cellular iron ion homeostasis, positive regulation of humoral immune response mediated by circulating immunoglobulin, positive regulation of immunoglobulin production, positive regulation of interferon-gamma-mediated signaling pathway, positive regulation of tyrosine phosphorylation of STAT protein		cellular iron ion homeostasis, heme metabolic process, hemoglobin metabolic process							heme metabolic process, hemoglobin metabolic process														extracellular space											metal ion binding								heme transporter activity, metal ion binding
Aconitate hydratase, mitochondrial OS=Rattus norvegicus OX=10116 GN=Aco2 PE=1 SV=2	ACON_RAT				citrate metabolic process, isocitrate metabolic process, tricarboxylic acid cycle	liver development						citrate metabolic process, isocitrate metabolic process, tricarboxylic acid cycle		liver development				response to isolation stress				cytosol, mitochondrion					mitochondrion		mitochondrion								3 iron, 4 sulfur cluster binding, 4 iron, 4 sulfur cluster binding, iron ion binding	aconitate hydratase activity							3 iron, 4 sulfur cluster binding, 4 iron, 4 sulfur cluster binding, aconitate hydratase activity, iron ion binding
SAP domain-containing ribonucleoprotein OS=Rattus norvegicus OX=10116 GN=Sarnp PE=1 SV=3	SARNP_RAT		regulation of translation				mRNA export from nucleus			mRNA export from nucleus		mRNA export from nucleus										cytoplasmic ribonucleoprotein granule					cytoplasmic ribonucleoprotein granule, nuclear speck, transcription export complex			nuclear speck, transcription export complex		nuclear speck, transcription export complex					RNA binding, RNA polymerase II core promoter proximal region sequence-specific DNA binding, RS domain binding, protein C-terminus binding								RNA binding, RNA polymerase II core promoter proximal region sequence-specific DNA binding, RS domain binding, protein C-terminus binding, transcriptional repressor activity, RNA polymerase II transcription regulatory region sequence-specific binding
Cluster of Transgelin-2 OS=Rattus norvegicus OX=10116 GN=Tagln2 PE=1 SV=1 (TAGL2_RAT)	TAGL2_RAT [2]				epithelial cell differentiation	epithelial cell differentiation
Transgelin-2 OS=Rattus norvegicus OX=10116 GN=Tagln2 PE=1 SV=1	TAGL2_RAT				epithelial cell differentiation	epithelial cell differentiation
Transgelin-3 OS=Rattus norvegicus OX=10116 GN=Tagln3 PE=1 SV=2	TAGL3_RAT
SAR1 gene homolog A (S. cerevisiae), isoform CRA_b OS=Rattus norvegicus OX=10116 GN=Sar1a PE=1 SV=1	Q6AY18_RAT
Glutathione peroxidase 1 OS=Rattus norvegicus OX=10116 GN=Gpx1 PE=1 SV=4	GPX1_RAT (+1)		cellular response to glucose stimulus		cellular response to glucose stimulus, glutathione metabolic process, hydrogen peroxide catabolic process	aging						glutathione metabolic process, hydrogen peroxide catabolic process						cellular response to glucose stimulus, response to estradiol, response to folic acid, response to glucose, response to hormone, response to hydrogen peroxide, response to nicotine, response to selenium ion				cytosol, mitochondrion					mitochondrion, nucleus		mitochondrion	nucleus					glutathione peroxidase activity			glutathione peroxidase activity							glutathione peroxidase activity
Angiopoietin-related protein 4 OS=Rattus norvegicus OX=10116 GN=Angptl4 PE=1 SV=1	ANGL4_RAT		negative regulation of catalytic activity, negative regulation of endothelial cell apoptotic process, negative regulation of lipoprotein lipase activity, regulation of lipid metabolic process, triglyceride homeostasis		protein homooligomerization, protein unfolding	angiogenesis						lipid metabolic process		angiogenesis				response to hypoxia								extracellular space											identical protein binding						enzyme inhibitor activity		enzyme inhibitor activity, identical protein binding
Acetyl-CoA acetyltransferase, cytosolic OS=Rattus norvegicus OX=10116 GN=Acat2 PE=1 SV=1	A0A0G2JUB4_RAT (+2)
Protein phosphatase 1 regulatory subunit 7 OS=Rattus norvegicus OX=10116 GN=Ppp1r7 PE=1 SV=1	PP1R7_RAT (+1)																										nucleus			nucleus
Cluster of Nuclease-sensitive element-binding protein 1 OS=Rattus norvegicus OX=10116 GN=Ybx1 PE=1 SV=1 (Q3ZAV2_RAT)	Q3ZAV2_RAT [3]
Nuclease-sensitive element-binding protein 1 OS=Rattus norvegicus OX=10116 GN=Ybx1 PE=1 SV=1	Q3ZAV2_RAT (+1)
RCG63497 OS=Rattus norvegicus OX=10116 GN=Ybx1-ps3 PE=4 SV=1	D3ZEV0_RAT
Heterogeneous nuclear ribonucleoprotein D0 OS=Rattus norvegicus OX=10116 GN=Hnrnpd PE=1 SV=2	HNRPD_RAT		3'-UTR-mediated mRNA destabilization, circadian regulation of translation, mRNA stabilization, negative regulation of gene expression, nuclear-transcribed mRNA catabolic process, exonucleolytic, positive regulation of gene expression, positive regulation of telomerase RNA reverse transcriptase activity, positive regulation of telomere capping, positive regulation of translation, regulation of cir…		cellular response to amino acid stimulus, cellular response to estradiol stimulus, cellular response to nitric oxide, cellular response to putrescine, hepatocyte dedifferentiation, mRNA transcription from RNA polymerase II promoter, nuclear-transcribed mRNA catabolic process, exonucleolytic	brain development, cerebellum development, hepatocyte dedifferentiation, liver development	nucleocytoplasmic transport			nucleocytoplasmic transport		mRNA transcription from RNA polymerase II promoter, nuclear-transcribed mRNA catabolic process, exonucleolytic		cerebellum development, circadian regulation of translation, liver development				cellular response to amino acid stimulus, cellular response to estradiol stimulus, cellular response to nitric oxide, cellular response to putrescine, response to calcium ion, response to electrical stimulus, response to estradiol, response to rapamycin, response to sodium phosphate	circadian regulation of translation			cytosol					nucleoplasm, nucleus			nucleoplasm		nucleoplasm					AT DNA binding, chromatin binding, histone deacetylase binding, mRNA 3'-UTR AU-rich region binding, mRNA binding, sequence-specific double-stranded DNA binding, telomeric DNA binding, transcription factor binding								AT DNA binding, chromatin binding, histone deacetylase binding, mRNA 3'-UTR AU-rich region binding, mRNA binding, sequence-specific double-stranded DNA binding, telomeric DNA binding, transcription factor binding
PDZ and LIM domain protein 1 OS=Rattus norvegicus OX=10116 GN=Pdlim1 PE=1 SV=4	PDLI1_RAT		regulation of transcription from RNA polymerase II promoter		actin cytoskeleton organization	heart development, muscle structure development								heart development				response to hypoxia				Z disc	filamentous actin, stress fiber				Z disc, filamentous actin, stress fiber					Z disc, filamentous actin, stress fiber					actin binding, metal ion binding, muscle alpha-actinin binding								actin binding, metal ion binding, muscle alpha-actinin binding, transcription coactivator activity
Stress-induced-phosphoprotein 1 OS=Rattus norvegicus OX=10116 GN=Stip1 PE=1 SV=1	STIP1_RAT				cellular response to interleukin-7													cellular response to interleukin-7				cytoplasm					nucleus			nucleus							Hsp70 protein binding, Hsp90 protein binding, chaperone binding, protein C-terminus binding								Hsp70 protein binding, Hsp90 protein binding, chaperone binding, protein C-terminus binding
Haptoglobin OS=Rattus norvegicus OX=10116 GN=Hp PE=1 SV=1	A0A0H2UHM3_RAT (+1)
Importin subunit beta-1 OS=Rattus norvegicus OX=10116 GN=Kpnb1 PE=1 SV=1	F2Z3Q8_RAT (+1)
Complement C4A (Fragment) OS=Rattus norvegicus OX=10116 GN=C4a PE=4 SV=4	A0A0G2JV52_RAT (+4)
Cluster of Glyceraldehyde-3-phosphate dehydrogenase OS=Rattus norvegicus OX=10116 GN=Gapdh PE=1 SV=3 (G3P_RAT)	G3P_RAT [8]		cAMP-mediated signaling, negative regulation of vascular associated smooth muscle cell apoptotic process, protein stabilization, regulation of translation		apoptotic process, cAMP-mediated signaling, glycolytic process, microtubule cytoskeleton organization, neuron apoptotic process, peptidyl-cysteine S-trans-nitrosylation, protein homotetramerization							carbohydrate metabolic process, gluconeogenesis, glycolytic process, peptidyl-cysteine S-trans-nitrosylation	female pregnancy	female pregnancy		female pregnancy	female pregnancy	cAMP-mediated signaling, response to ammonium ion				cytoplasm, cytosol	microtubule cytoskeleton				microtubule cytoskeleton, nucleus			nucleus		postsynaptic density, intracellular component					NAD binding, NADP binding, microtubule binding, protein homodimerization activity	glyceraldehyde-3-phosphate dehydrogenase (NAD+) (phosphorylating) activity, peptidyl-cysteine S-nitrosylase activity							NAD binding, NADP binding, glyceraldehyde-3-phosphate dehydrogenase (NAD+) (phosphorylating) activity, microtubule binding, peptidyl-cysteine S-nitrosylase activity, protein homodimerization activity
Glyceraldehyde-3-phosphate dehydrogenase OS=Rattus norvegicus OX=10116 GN=Gapdh PE=1 SV=3	G3P_RAT		cAMP-mediated signaling, negative regulation of vascular associated smooth muscle cell apoptotic process, protein stabilization, regulation of translation		apoptotic process, cAMP-mediated signaling, glycolytic process, microtubule cytoskeleton organization, neuron apoptotic process, peptidyl-cysteine S-trans-nitrosylation, protein homotetramerization							carbohydrate metabolic process, gluconeogenesis, glycolytic process, peptidyl-cysteine S-trans-nitrosylation	female pregnancy	female pregnancy		female pregnancy	female pregnancy	cAMP-mediated signaling, response to ammonium ion				cytoplasm, cytosol	microtubule cytoskeleton				microtubule cytoskeleton, nucleus			nucleus		postsynaptic density, intracellular component					NAD binding, NADP binding, microtubule binding, protein homodimerization activity	glyceraldehyde-3-phosphate dehydrogenase (NAD+) (phosphorylating) activity, peptidyl-cysteine S-nitrosylase activity							NAD binding, NADP binding, glyceraldehyde-3-phosphate dehydrogenase (NAD+) (phosphorylating) activity, microtubule binding, peptidyl-cysteine S-nitrosylase activity, protein homodimerization activity
Glyceraldehyde-3-phosphate dehydrogenase OS=Rattus norvegicus OX=10116 GN=Gapdhs PE=1 SV=1	B1WBQ8_RAT (+1)
Glyceraldehyde-3-phosphate dehydrogenase OS=Rattus norvegicus OX=10116 PE=1 SV=1	M0R660_RAT
Uncharacterized protein OS=Rattus norvegicus OX=10116 PE=1 SV=1	D3ZQT0_RAT
Glyceraldehyde-3-phosphate dehydrogenase OS=Rattus norvegicus OX=10116 PE=3 SV=1	E9PTN6_RAT
Uncharacterized protein OS=Rattus norvegicus OX=10116 PE=1 SV=1	D3ZME3_RAT
Uncharacterized protein OS=Rattus norvegicus OX=10116 PE=1 SV=1	A0A0G2K8S2_RAT
Electron transfer flavoprotein subunit beta OS=Rattus norvegicus OX=10116 GN=Etfb PE=1 SV=3	ETFB_RAT				fatty acid beta-oxidation using acyl-CoA dehydrogenase							fatty acid beta-oxidation using acyl-CoA dehydrogenase										mitochondrial matrix					mitochondrial matrix		mitochondrial matrix			mitochondrial matrix					nucleotide binding					electron carrier activity			electron carrier activity, nucleotide binding
Serine-threonine kinase receptor-associated protein-like OS=Rattus norvegicus OX=10116 GN=LOC100910575 PE=4 SV=1	M0RCV0_RAT (+1)
Septin 6 (Predicted), isoform CRA_b OS=Rattus norvegicus OX=10116 GN=Sept11 PE=1 SV=1	A0A0G2JUL7_RAT (+1)
Cytochrome b-c1 complex subunit 2, mitochondrial OS=Rattus norvegicus OX=10116 GN=Uqcrc2 PE=1 SV=2	QCR2_RAT				protein processing involved in protein targeting to mitochondrion		protein processing involved in protein targeting to mitochondrion			protein processing involved in protein targeting to mitochondrion		oxidation-reduction process, protein processing involved in protein targeting to mitochondrion						response to drug				mitochondrial inner membrane, mitochondrial processing peptidase complex, mitochondrial respiratory chain complex III, mitochondrial respiratory chain complex IV, mitochondrion					mitochondrial inner membrane, mitochondrial processing peptidase complex, mitochondrial respiratory chain complex III, mitochondrial respiratory chain complex IV, mitochondrion, nucleoplasm	mitochondrial inner membrane, mitochondrial respiratory chain complex III, mitochondrial respiratory chain complex IV	mitochondrial inner membrane, mitochondrial processing peptidase complex, mitochondrial respiratory chain complex III, mitochondrial respiratory chain complex IV	nucleoplasm	mitochondrial inner membrane, mitochondrial respiratory chain complex III, mitochondrial respiratory chain complex IV	mitochondrial inner membrane, mitochondrial processing peptidase complex, mitochondrial respiratory chain complex III, mitochondrial respiratory chain complex IV, nucleoplasm					macromolecular complex binding, metal ion binding	metalloendopeptidase activity							macromolecular complex binding, metal ion binding, metalloendopeptidase activity
Coatomer subunit delta OS=Rattus norvegicus OX=10116 GN=Arcn1 PE=2 SV=1	COPD_RAT					cerebellar Purkinje cell layer maturation	ER to Golgi vesicle-mediated transport, Golgi vesicle transport, protein transport, retrograde vesicle-mediated transport, Golgi to ER			ER to Golgi vesicle-mediated transport, Golgi localization, Golgi vesicle transport, protein transport, retrograde vesicle-mediated transport, Golgi to ER				adult locomotory behavior, cerebellar Purkinje cell layer maturation	pigmentation						COPI vesicle coat, COPI-coated vesicle, Golgi membrane	COPI vesicle coat, COPI-coated vesicle, Golgi apparatus, Golgi membrane, cytosol, endoplasmic reticulum		endoplasmic reticulum			COPI vesicle coat, COPI-coated vesicle, Golgi apparatus, Golgi membrane, endoplasmic reticulum	COPI vesicle coat, Golgi membrane			COPI vesicle coat, Golgi membrane	COPI vesicle coat, COPI-coated vesicle, Golgi membrane
Creatine kinase B-type OS=Rattus norvegicus OX=10116 GN=Ckb PE=1 SV=2	KCRB_RAT		cellular chloride ion homeostasis		cellular chloride ion homeostasis, phosphocreatine biosynthetic process	brain development, cerebellum development						phosphocreatine biosynthetic process		brain development, cerebellum development								cytosol				extracellular space	nucleus			nucleus							ATP binding, ubiquitin protein ligase binding	creatine kinase activity, kinase activity							ATP binding, creatine kinase activity, kinase activity, ubiquitin protein ligase binding
Cluster of Serum albumin OS=Rattus norvegicus OX=10116 GN=Alb PE=1 SV=2 (ALBU_RAT)	ALBU_RAT [2]		maintenance of mitochondrion location, negative regulation of apoptotic process, negative regulation of protein oligomerization, positive regulation of circadian sleep/wake cycle, non-REM sleep, vasodilation		cellular response to starvation, maintenance of mitochondrion location					maintenance of mitochondrion location				vasodilation				cellular response to starvation, response to mercury ion, response to nutrient, response to organic substance, response to platinum ion				cytoplasm				basement membrane, extracellular exosome, extracellular space											DNA binding, chaperone binding, drug binding, enterobactin binding, enzyme binding, fatty acid binding, identical protein binding, pyridoxal phosphate binding, toxic substance binding, zinc ion binding								DNA binding, chaperone binding, drug binding, enterobactin binding, enzyme binding, fatty acid binding, identical protein binding, pyridoxal phosphate binding, toxic substance binding, zinc ion binding
Serum albumin OS=Rattus norvegicus OX=10116 GN=Alb PE=1 SV=2	ALBU_RAT		maintenance of mitochondrion location, negative regulation of apoptotic process, negative regulation of protein oligomerization, positive regulation of circadian sleep/wake cycle, non-REM sleep, vasodilation		cellular response to starvation, maintenance of mitochondrion location					maintenance of mitochondrion location				vasodilation				cellular response to starvation, response to mercury ion, response to nutrient, response to organic substance, response to platinum ion				cytoplasm				basement membrane, extracellular exosome, extracellular space											DNA binding, chaperone binding, drug binding, enterobactin binding, enzyme binding, fatty acid binding, identical protein binding, pyridoxal phosphate binding, toxic substance binding, zinc ion binding								DNA binding, chaperone binding, drug binding, enterobactin binding, enzyme binding, fatty acid binding, identical protein binding, pyridoxal phosphate binding, toxic substance binding, zinc ion binding
Serum albumin OS=Rattus norvegicus OX=10116 GN=Alb PE=1 SV=1	A0A0G2JSH5_RAT
Cluster of Fibulin-1 OS=Rattus norvegicus OX=10116 GN=Fbln1 PE=1 SV=1 (D3ZQ25_RAT)	D3ZQ25_RAT [2]
Fibulin-1 OS=Rattus norvegicus OX=10116 GN=Fbln1 PE=1 SV=1	B1WC21_RAT
Fibulin-1 OS=Rattus norvegicus OX=10116 GN=Fbln1 PE=1 SV=1	D3ZQ25_RAT
Cluster of Plectin OS=Rattus norvegicus OX=10116 GN=Plec PE=1 SV=2 (PLEC_RAT)	PLEC_RAT [2]				epithelial cell differentiation, hemidesmosome assembly, intermediate filament cytoskeleton organization	epithelial cell differentiation							female pregnancy	female pregnancy		female pregnancy	female pregnancy	response to nutrient, wound healing				costamere, perinuclear region of cytoplasm, sarcoplasm	cytoskeleton				costamere, cytoskeleton	apical plasma membrane, basal plasma membrane, membrane, sarcolemma				costamere	apical plasma membrane, basal plasma membrane, sarcolemma				actin binding, ankyrin binding, protein N-terminus binding								actin binding, ankyrin binding, protein N-terminus binding, structural constituent of cytoskeleton, structural constituent of muscle
Plectin OS=Rattus norvegicus OX=10116 GN=Plec PE=1 SV=2	PLEC_RAT				epithelial cell differentiation, hemidesmosome assembly, intermediate filament cytoskeleton organization	epithelial cell differentiation							female pregnancy	female pregnancy		female pregnancy	female pregnancy	response to nutrient, wound healing				costamere, perinuclear region of cytoplasm, sarcoplasm	cytoskeleton				costamere, cytoskeleton	apical plasma membrane, basal plasma membrane, membrane, sarcolemma				costamere	apical plasma membrane, basal plasma membrane, sarcolemma				actin binding, ankyrin binding, protein N-terminus binding								actin binding, ankyrin binding, protein N-terminus binding, structural constituent of cytoskeleton, structural constituent of muscle
Plectin OS=Rattus norvegicus OX=10116 GN=Plec PE=1 SV=1	Q6S3A5_RAT
Serine/threonine-protein phosphatase OS=Rattus norvegicus OX=10116 GN=LOC100362453 PE=3 SV=1	A0A0G2JYA4_RAT (+1)
Cluster of 60S ribosomal protein L12 OS=Rattus norvegicus OX=10116 GN=Rpl12 PE=2 SV=1 (RL12_RAT)	RL12_RAT [2]		positive regulation of translational elongation		ribosomal large subunit assembly, translation							translation										cytosolic large ribosomal subunit					cytosolic large ribosomal subunit					cytosolic large ribosomal subunit		cytosolic large ribosomal subunit			large ribosomal subunit rRNA binding, rRNA binding								large ribosomal subunit rRNA binding, rRNA binding, structural constituent of ribosome
60S ribosomal protein L12 OS=Rattus norvegicus OX=10116 GN=Rpl12 PE=2 SV=1	RL12_RAT		positive regulation of translational elongation		ribosomal large subunit assembly, translation							translation										cytosolic large ribosomal subunit					cytosolic large ribosomal subunit					cytosolic large ribosomal subunit		cytosolic large ribosomal subunit			large ribosomal subunit rRNA binding, rRNA binding								large ribosomal subunit rRNA binding, rRNA binding, structural constituent of ribosome
Uncharacterized protein OS=Rattus norvegicus OX=10116 PE=3 SV=2	D4A8N3_RAT
Succinate--CoA ligase [GDP-forming] subunit beta, mitochondrial OS=Rattus norvegicus OX=10116 GN=Suclg2 PE=1 SV=2	F1LPV8_RAT
Cathepsin Z OS=Rattus norvegicus OX=10116 GN=Ctsz PE=1 SV=2	CATZ_RAT		negative regulation of neuron projection development, negative regulation of plasminogen activation, negative regulation of protein binding, positive regulation of neural precursor cell proliferation, positive regulation of neuron apoptotic process		negative regulation of neuron projection development, proteolysis involved in cellular protein catabolic process	epithelial tube branching involved in lung morphogenesis, negative regulation of neuron projection development						proteolysis involved in cellular protein catabolic process		epithelial tube branching involved in lung morphogenesis, negative regulation of neuron projection development								cell cortex region, cytoplasmic vesicle, endoplasmic reticulum, lysosome		endoplasmic reticulum		extracellular space	cytoplasmic vesicle, endoplasmic reticulum, lysosome											carboxypeptidase activity, cysteine-type endopeptidase activity							carboxypeptidase activity, cysteine-type endopeptidase activity
Nucleosome assembly protein 1-like 1 OS=Rattus norvegicus OX=10116 GN=Nap1l1 PE=1 SV=1	G3V6H9_RAT
Cluster of Heterogeneous nuclear ribonucleoprotein M OS=Rattus norvegicus OX=10116 GN=Hnrnpm PE=1 SV=1 (F1LV13_RAT)	F1LV13_RAT [2]		positive regulation of protein import, positive regulation of protein localization to nucleus, regulation of mRNA stability involved in response to oxidative stress		alternative mRNA splicing, via spliceosome, cellular response to carcinoembryonic antigen, cellular response to lipopolysaccharide, regulation of mRNA stability involved in response to oxidative stress							alternative mRNA splicing, via spliceosome	cellular response to lipopolysaccharide					cellular response to carcinoembryonic antigen, cellular response to lipopolysaccharide, regulation of mRNA stability involved in response to oxidative stress				cytoplasm					nuclear matrix, nucleus, post-mRNA release spliceosomal complex			nuclear matrix, post-mRNA release spliceosomal complex		nuclear matrix, post-mRNA release spliceosomal complex					calcium-dependent protein binding, mRNA binding, protein antigen binding								calcium-dependent protein binding, mRNA binding, protein antigen binding
Heterogeneous nuclear ribonucleoprotein M OS=Rattus norvegicus OX=10116 GN=Hnrnpm PE=1 SV=1	F1LV13_RAT
Heterogeneous nuclear ribonucleoprotein M OS=Rattus norvegicus OX=10116 GN=Hnrnpm PE=1 SV=4	HNRPM_RAT		positive regulation of protein import, positive regulation of protein localization to nucleus, regulation of mRNA stability involved in response to oxidative stress		alternative mRNA splicing, via spliceosome, cellular response to carcinoembryonic antigen, cellular response to lipopolysaccharide, regulation of mRNA stability involved in response to oxidative stress							alternative mRNA splicing, via spliceosome	cellular response to lipopolysaccharide					cellular response to carcinoembryonic antigen, cellular response to lipopolysaccharide, regulation of mRNA stability involved in response to oxidative stress				cytoplasm					nuclear matrix, nucleus, post-mRNA release spliceosomal complex			nuclear matrix, post-mRNA release spliceosomal complex		nuclear matrix, post-mRNA release spliceosomal complex					calcium-dependent protein binding, mRNA binding, protein antigen binding								calcium-dependent protein binding, mRNA binding, protein antigen binding
Osteoglycin OS=Rattus norvegicus OX=10116 GN=Ogn PE=1 SV=1	D3ZVB7_RAT
V-type proton ATPase subunit B, brain isoform OS=Rattus norvegicus OX=10116 GN=Atp6v1b2 PE=1 SV=1	VATB2_RAT		regulation of cellular pH, vacuolar acidification		ATP metabolic process, regulation of cellular pH, vacuolar acidification		hydrogen ion transmembrane transport			hydrogen ion transmembrane transport		ATP metabolic process										cytosol, melanosome					intracellular membrane-bounded organelle, melanosome	apical plasma membrane, integral component of membrane, plasma membrane, proton-transporting V-type ATPase, V1 domain					apical plasma membrane				ATP binding	hydrolase activity							ATP binding, hydrolase activity
Catalase OS=Rattus norvegicus OX=10116 GN=Cat PE=1 SV=3	CATA_RAT		negative regulation of NF-kappaB transcription factor activity, negative regulation of apoptotic process, positive regulation of NF-kappaB transcription factor activity, positive regulation of cell division, positive regulation of phosphatidylinositol 3-kinase signaling		aerobic respiration, cellular response to growth factor stimulus, hemoglobin metabolic process, hydrogen peroxide catabolic process, protein homotetramerization, triglyceride metabolic process	aging, kidney development, ureteric bud development						aerobic respiration, cholesterol metabolic process, hemoglobin metabolic process, hydrogen peroxide catabolic process, triglyceride metabolic process		kidney development, ureteric bud development				UV protection, cellular response to growth factor stimulus, response to L-ascorbic acid, response to UV, response to activity, response to cadmium ion, response to drug, response to estradiol, response to ethanol, response to fatty acid, response to hydrogen peroxide, response to hyperoxia, response to hypoxia, response to inactivity, response to insulin, response to lead ion, response to light i…			Golgi apparatus	Golgi apparatus, cytosol, endoplasmic reticulum, lysosome, mitochondrial intermembrane space, peroxisomal membrane, peroxisome		endoplasmic reticulum		extracellular space	Golgi apparatus, endoplasmic reticulum, lysosome, mitochondrial intermembrane space, peroxisomal membrane, peroxisome	peroxisomal membrane, plasma membrane	mitochondrial intermembrane space		peroxisomal membrane	mitochondrial intermembrane space, peroxisomal membrane	plasma membrane		catalase activity		NADP binding, enzyme binding, heme binding, metal ion binding, protein homodimerization activity, receptor binding	aminoacylase activity, catalase activity							NADP binding, aminoacylase activity, catalase activity, enzyme binding, heme binding, metal ion binding, protein homodimerization activity, receptor binding
Cluster of Myosin light polypeptide 6 OS=Rattus norvegicus OX=10116 GN=Myl6 PE=1 SV=1 (A0A0G2K6J5_RAT)	A0A0G2K6J5_RAT [2]
Myosin light polypeptide 6 OS=Rattus norvegicus OX=10116 GN=Myl6 PE=1 SV=1	A0A0G2K6J5_RAT
Similar to Myosin light chain 1 slow a (Predicted) OS=Rattus norvegicus OX=10116 GN=RGD1560334_predicted PE=4 SV=1	D3ZHA7_RAT
Polyadenylate-binding protein 1 OS=Rattus norvegicus OX=10116 GN=Pabpc1 PE=1 SV=1	A0A0G2JZS2_RAT (+2)
Heterogeneous nuclear ribonucleoprotein Q OS=Rattus norvegicus OX=10116 GN=Syncrip PE=1 SV=1	A0A0G2K9J1_RAT
Peroxisomal bifunctional enzyme OS=Rattus norvegicus OX=10116 GN=Ehhadh PE=1 SV=2	ECHP_RAT				fatty acid beta-oxidation, internal protein amino acid acetylation							fatty acid beta-oxidation, internal protein amino acid acetylation										cytosol, peroxisome					peroxisome										enzyme binding	3-hydroxyacyl-CoA dehydrogenase activity, dodecenoyl-CoA delta-isomerase activity, enoyl-CoA hydratase activity							3-hydroxyacyl-CoA dehydrogenase activity, dodecenoyl-CoA delta-isomerase activity, enoyl-CoA hydratase activity, enzyme binding
Cluster of Triosephosphate isomerase OS=Rattus norvegicus OX=10116 GN=Tpi1 PE=1 SV=2 (TPIS_RAT)	TPIS_RAT [2]				glyceraldehyde-3-phosphate biosynthetic process, glycerol catabolic process, glycolytic process, methylglyoxal biosynthetic process							carbohydrate metabolic process, gluconeogenesis, glyceraldehyde-3-phosphate biosynthetic process, glycerol catabolic process, glycolytic process, methylglyoxal biosynthetic process										cytosol					nucleus			nucleus							protein homodimerization activity	methylglyoxal synthase activity, triose-phosphate isomerase activity							methylglyoxal synthase activity, protein homodimerization activity, triose-phosphate isomerase activity
Triosephosphate isomerase OS=Rattus norvegicus OX=10116 GN=Tpi1 PE=1 SV=2	TPIS_RAT				glyceraldehyde-3-phosphate biosynthetic process, glycerol catabolic process, glycolytic process, methylglyoxal biosynthetic process							carbohydrate metabolic process, gluconeogenesis, glyceraldehyde-3-phosphate biosynthetic process, glycerol catabolic process, glycolytic process, methylglyoxal biosynthetic process										cytosol					nucleus			nucleus							protein homodimerization activity	methylglyoxal synthase activity, triose-phosphate isomerase activity							methylglyoxal synthase activity, protein homodimerization activity, triose-phosphate isomerase activity
Triosephosphate isomerase OS=Rattus norvegicus OX=10116 PE=1 SV=1	A0A0G2JWU1_RAT
Protein S100-A6 OS=Rattus norvegicus OX=10116 GN=S100a6 PE=1 SV=3	S10A6_RAT																					cytosol, perinuclear region of cytoplasm					nuclear envelope	extrinsic component of cytoplasmic side of plasma membrane		nuclear envelope		nuclear envelope	extrinsic component of cytoplasmic side of plasma membrane				S100 protein binding, calcium ion binding, calcium-dependent protein binding, protein homodimerization activity, tropomyosin binding, zinc ion binding								S100 protein binding, calcium ion binding, calcium-dependent protein binding, ion transmembrane transporter activity, protein homodimerization activity, tropomyosin binding, zinc ion binding
Spliceosome RNA helicase Ddx39b OS=Rattus norvegicus OX=10116 GN=Ddx39b PE=1 SV=1	A0A0G2KAT4_RAT (+1)
40S ribosomal protein S3 OS=Rattus norvegicus OX=10116 GN=Rps3 PE=1 SV=1	RS3_RAT		positive regulation of DNA repair, positive regulation of apoptotic signaling pathway, regulation of apoptotic process, regulation of translation		DNA repair, apoptotic process, cell cycle, cell division, cellular response to DNA damage stimulus, cellular response to nerve growth factor stimulus, translation							DNA repair, translation						DNA repair, cellular response to DNA damage stimulus, cellular response to nerve growth factor stimulus				cytosolic small ribosomal subunit, mitochondrial inner membrane	spindle				cytosolic small ribosomal subunit, mitochondrial inner membrane, nucleolus, nucleus, spindle	mitochondrial inner membrane	mitochondrial inner membrane	nucleolus	mitochondrial inner membrane	cytosolic small ribosomal subunit, mitochondrial inner membrane, nucleolus, spindle		cytosolic small ribosomal subunit			RNA binding, kinase binding, oxidized purine DNA binding	DNA-(apurinic or apyrimidinic site) lyase activity, oxidized purine nucleobase lesion DNA N-glycosylase activity							DNA-(apurinic or apyrimidinic site) lyase activity, RNA binding, kinase binding, oxidized purine DNA binding, oxidized purine nucleobase lesion DNA N-glycosylase activity, structural constituent of ribosome
ATPase H+-transporting V1 subunit A OS=Rattus norvegicus OX=10116 GN=Atp6v1a PE=1 SV=1	D4A133_RAT
Dipeptidyl peptidase 3 OS=Rattus norvegicus OX=10116 GN=Dpp3 PE=1 SV=2	DPP3_RAT											proteolysis										cytosol															zinc ion binding	dipeptidyl-peptidase activity, metallopeptidase activity							dipeptidyl-peptidase activity, metallopeptidase activity, zinc ion binding
Aspartyl aminopeptidase OS=Rattus norvegicus OX=10116 GN=Dnpep PE=1 SV=1	Q4V8H5_RAT
Cluster of T-kininogen 1 OS=Rattus norvegicus OX=10116 GN=Map1 PE=1 SV=2 (KNT1_RAT)	KNT1_RAT [3]		negative regulation of blood coagulation, negative regulation of endopeptidase activity, positive regulation of cytosolic calcium ion concentration, vasodilation		positive regulation of cytosolic calcium ion concentration									vasodilation				acute-phase response								extracellular space																	cysteine-type endopeptidase inhibitor activity		cysteine-type endopeptidase inhibitor activity
T-kininogen 1 OS=Rattus norvegicus OX=10116 GN=Map1 PE=1 SV=2	KNT1_RAT		negative regulation of blood coagulation, negative regulation of endopeptidase activity, positive regulation of cytosolic calcium ion concentration, vasodilation		positive regulation of cytosolic calcium ion concentration									vasodilation				acute-phase response								extracellular space																	cysteine-type endopeptidase inhibitor activity		cysteine-type endopeptidase inhibitor activity
T-kininogen 2 OS=Rattus norvegicus OX=10116 PE=1 SV=2	KNT2_RAT		negative regulation of blood coagulation, negative regulation of endopeptidase activity, positive regulation of cytosolic calcium ion concentration, vasodilation		positive regulation of cytosolic calcium ion concentration									vasodilation				acute-phase response								extracellular space																	cysteine-type endopeptidase inhibitor activity		cysteine-type endopeptidase inhibitor activity
Kininogen-1 OS=Rattus norvegicus OX=10116 GN=Kng1 PE=1 SV=1	A0A0G2KA54_RAT
Eukaryotic translation elongation factor 1 beta 2 OS=Rattus norvegicus OX=10116 GN=Eef1b2 PE=1 SV=1	B5DEN5_RAT
Malate dehydrogenase, cytoplasmic OS=Rattus norvegicus OX=10116 GN=Mdh1 PE=1 SV=3	MDHC_RAT				NADH metabolic process, malate metabolic process, oxaloacetate metabolic process, tricarboxylic acid cycle							NADH metabolic process, carbohydrate metabolic process, malate metabolic process, oxaloacetate metabolic process, tricarboxylic acid cycle										cytosol															NAD binding	L-malate dehydrogenase activity							L-malate dehydrogenase activity, NAD binding
Heat shock protein HSP 90-beta OS=Rattus norvegicus OX=10116 GN=Hsp90ab1 PE=1 SV=4	HS90B_RAT	virion attachment to host cell	negative regulation of cell cycle arrest, negative regulation of complement-dependent cytotoxicity, negative regulation of neuron apoptotic process, negative regulation of proteasomal protein catabolic process, negative regulation of proteasomal ubiquitin-dependent protein catabolic process, negative regulation of protein metabolic process, negative regulation of transforming growth factor beta a…		axon extension, cellular response to drug, cellular response to heat, cellular response to interleukin-4, cellular response to organic cyclic compound, central nervous system neuron axonogenesis, chaperone-mediated autophagy, chaperone-mediated protein complex assembly, chaperone-mediated protein transport involved in chaperone-mediated autophagy, establishment of cell polarity, positive regulati…	axon extension, central nervous system neuron axonogenesis, placenta development	chaperone-mediated protein transport involved in chaperone-mediated autophagy	axon extension		chaperone-mediated protein transport involved in chaperone-mediated autophagy		chaperone-mediated autophagy, chaperone-mediated protein transport involved in chaperone-mediated autophagy, telomere maintenance via telomerase	virion attachment to host cell	axon extension, central nervous system neuron axonogenesis, placenta development		placenta development	placenta development	cellular response to drug, cellular response to heat, cellular response to interleukin-4, cellular response to organic cyclic compound, response to cocaine, response to drug, response to salt stress, response to unfolded protein		virion attachment to host cell		HSP90-CDC37 chaperone complex, cytosol, lysosomal membrane, melanosome, ooplasm, perinuclear region of cytoplasm				extracellular region	COP9 signalosome, lysosomal membrane, melanosome, nucleus	apical plasma membrane, basolateral plasma membrane, brush border membrane, lysosomal membrane, plasma membrane, sperm head plasma membrane		COP9 signalosome	lysosomal membrane	COP9 signalosome, lysosomal membrane	apical plasma membrane, basolateral plasma membrane, brush border membrane, plasma membrane, sperm head plasma membrane				ATP binding, ATP-dependent protein binding, CTP binding, DNA polymerase binding, GTP binding, UTP binding, dATP binding, disordered domain specific binding, double-stranded RNA binding, drug binding, heat shock protein binding, histone deacetylase binding, histone methyltransferase binding, ion channel binding, peptide binding, protein binding involved in protein folding, protein dimerization act…						protein kinase regulator activity		ATP binding, ATP-dependent protein binding, CTP binding, DNA polymerase binding, GTP binding, UTP binding, dATP binding, disordered domain specific binding, double-stranded RNA binding, drug binding, heat shock protein binding, histone deacetylase binding, histone methyltransferase binding, ion channel binding, peptide binding, protein binding involved in protein folding, protein dimerization act…
Very long-chain specific acyl-CoA dehydrogenase, mitochondrial OS=Rattus norvegicus OX=10116 GN=Acadvl PE=1 SV=1	ACADV_RAT (+1)		negative regulation of fatty acid biosynthetic process, negative regulation of fatty acid oxidation, regulation of cholesterol metabolic process, temperature homeostasis		epithelial cell differentiation, fatty acid beta-oxidation, fatty acid beta-oxidation using acyl-CoA dehydrogenase	epithelial cell differentiation						fatty acid beta-oxidation, fatty acid beta-oxidation using acyl-CoA dehydrogenase		temperature homeostasis				response to cold				mitochondrial inner membrane, mitochondrial membrane, mitochondrial nucleoid, mitochondrion					mitochondrial inner membrane, mitochondrial membrane, mitochondrial nucleoid, mitochondrion	mitochondrial inner membrane, mitochondrial membrane	mitochondrial inner membrane, mitochondrial membrane, mitochondrial nucleoid		mitochondrial inner membrane, mitochondrial membrane	mitochondrial inner membrane, mitochondrial membrane, mitochondrial nucleoid					fatty-acyl-CoA binding, flavin adenine dinucleotide binding	acyl-CoA dehydrogenase activity, long-chain-acyl-CoA dehydrogenase activity, very-long-chain-acyl-CoA dehydrogenase activity							acyl-CoA dehydrogenase activity, fatty-acyl-CoA binding, flavin adenine dinucleotide binding, long-chain-acyl-CoA dehydrogenase activity, very-long-chain-acyl-CoA dehydrogenase activity
Aminopeptidase OS=Rattus norvegicus OX=10116 GN=Npepps PE=1 SV=1	F1M9V7_RAT
Proteasome subunit beta type-2 OS=Rattus norvegicus OX=10116 GN=Psmb2 PE=1 SV=1	PSB2_RAT				proteasomal protein catabolic process, proteasomal ubiquitin-independent protein catabolic process, proteasome-mediated ubiquitin-dependent protein catabolic process							proteasomal protein catabolic process, proteasomal ubiquitin-independent protein catabolic process, proteasome-mediated ubiquitin-dependent protein catabolic process						response to organic cyclic compound, response to organonitrogen compound				cytoplasm					nucleoplasm, nucleus			nucleoplasm, nucleus		nucleoplasm						endopeptidase activity, threonine-type endopeptidase activity							endopeptidase activity, threonine-type endopeptidase activity
Proteasome (Prosome, macropain) 26S subunit, non-ATPase, 3 OS=Rattus norvegicus OX=10116 GN=Psmd3 PE=1 SV=1	Q5U2S7_RAT
Citrate synthase OS=Rattus norvegicus OX=10116 GN=Cs PE=1 SV=1	G3V936_RAT
Coronin OS=Rattus norvegicus OX=10116 GN=Coro1b PE=1 SV=1	G3V940_RAT
RCG25684, isoform CRA_a OS=Rattus norvegicus OX=10116 GN=Tmod3 PE=1 SV=1	Q6AXW2_RAT
Secretion-associated, Ras-related GTPase 1A OS=Rattus norvegicus OX=10116 GN=Sar1a PE=1 SV=1	A0A0G2JUD2_RAT (+1)
Acidic leucine-rich nuclear phosphoprotein 32 family member B OS=Rattus norvegicus OX=10116 GN=Anp32b PE=1 SV=1	AN32B_RAT (+1)		negative regulation of apoptotic process, positive regulation of G1/S transition of mitotic cell cycle, positive regulation of cell proliferation																								nucleus			nucleus							histone binding								histone binding
Transforming growth factor beta-1-induced transcript 1 protein OS=Rattus norvegicus OX=10116 GN=Tgfb1i1 PE=1 SV=2	TGFI1_RAT	substrate adhesion-dependent cell spreading	Wnt signaling pathway, negative regulation of fat cell differentiation, negative regulation of transforming growth factor beta receptor signaling pathway, positive regulation of epithelial to mesenchymal transition, positive regulation of transcription, DNA-templated, positive regulation of transforming growth factor beta receptor signaling pathway, transforming growth factor beta receptor signal…		Wnt signaling pathway, cell fate commitment, endothelial cell migration, epithelial cell differentiation, substrate adhesion-dependent cell spreading, transforming growth factor beta receptor signaling pathway, ubiquitin-dependent SMAD protein catabolic process	cell fate commitment, epithelial cell differentiation, morphogenesis of embryonic epithelium, substrate adhesion-dependent cell spreading				endothelial cell migration	endothelial cell migration	ubiquitin-dependent SMAD protein catabolic process		endothelial cell migration, morphogenesis of embryonic epithelium				Wnt signaling pathway, response to heat, transforming growth factor beta receptor signaling pathway, ubiquitin-dependent SMAD protein catabolic process				cytosol	cytoskeleton				cytoskeleton, nuclear matrix	plasma membrane		nuclear matrix		nuclear matrix	plasma membrane				I-SMAD binding, Roundabout binding, androgen receptor binding, metal ion binding								I-SMAD binding, Roundabout binding, androgen receptor binding, metal ion binding, transcription coactivator activity
Non-muscle caldesmon OS=Rattus norvegicus OX=10116 GN=Cald1 PE=1 SV=1	A0A0G2JTV2_RAT
RCG24674, isoform CRA_b OS=Rattus norvegicus OX=10116 GN=Synm PE=1 SV=2	G3V9G5_RAT
Phosphoglucomutase-1 OS=Rattus norvegicus OX=10116 GN=Pgm1 PE=1 SV=2	PGM1_RAT (+1)		cellular calcium ion homeostasis		cellular calcium ion homeostasis, cellular response to magnetism, glycogen biosynthetic process							carbohydrate metabolic process, galactose catabolic process, glucose metabolic process, glycogen biosynthetic process						cellular response to magnetism				Z disc, cytosol					Z disc					Z disc					magnesium ion binding	phosphoglucomutase activity							magnesium ion binding, phosphoglucomutase activity
Deaminated glutathione amidase OS=Rattus norvegicus OX=10116 GN=Nit1 PE=2 SV=2	NIT1_RAT											nitrogen compound metabolic process										mitochondrion					mitochondrion		mitochondrion									hydrolase activity, acting on carbon-nitrogen (but not peptide) bonds, in linear amides							hydrolase activity, acting on carbon-nitrogen (but not peptide) bonds, in linear amides
Glutathione S-transferase Mu 1 OS=Rattus norvegicus OX=10116 GN=Gstm1 PE=1 SV=2	G3V983_RAT (+1)
Coatomer subunit beta OS=Rattus norvegicus OX=10116 GN=Copb1 PE=1 SV=1	COPB_RAT						ER to Golgi vesicle-mediated transport, intra-Golgi vesicle-mediated transport, intracellular protein transport, retrograde vesicle-mediated transport, Golgi to ER			ER to Golgi vesicle-mediated transport, intra-Golgi vesicle-mediated transport, intracellular protein transport, retrograde vesicle-mediated transport, Golgi to ER											COPI vesicle coat, COPI-coated vesicle, Golgi apparatus, Golgi membrane	COPI vesicle coat, COPI-coated vesicle, Golgi apparatus, Golgi membrane, cytosol, endoplasmic reticulum, endoplasmic reticulum-Golgi intermediate compartment		endoplasmic reticulum			COPI vesicle coat, COPI-coated vesicle, Golgi apparatus, Golgi membrane, endoplasmic reticulum, endoplasmic reticulum-Golgi intermediate compartment	COPI vesicle coat, Golgi membrane, plasma membrane			COPI vesicle coat, Golgi membrane	COPI vesicle coat, COPI-coated vesicle, Golgi membrane	plasma membrane												structural molecule activity
Aspartate aminotransferase, mitochondrial OS=Rattus norvegicus OX=10116 GN=Got2 PE=1 SV=2	AATM_RAT		lactation		aspartate biosynthetic process, aspartate catabolic process, dicarboxylic acid metabolic process, glutamate catabolic process to 2-oxoglutarate, glutamate catabolic process to aspartate, glutamate metabolic process, oxaloacetate metabolic process	lactation	fatty acid transport, lactation			fatty acid transport, lactation		aspartate biosynthetic process, aspartate catabolic process, dicarboxylic acid metabolic process, glutamate catabolic process to 2-oxoglutarate, glutamate catabolic process to aspartate, glutamate metabolic process, oxaloacetate metabolic process	female pregnancy	female pregnancy, lactation		female pregnancy	female pregnancy	response to ethanol, response to insulin, response to morphine, response to muscle activity				mitochondrial inner membrane, mitochondrial matrix, mitochondrion					mitochondrial inner membrane, mitochondrial matrix, mitochondrion	T-tubule, mitochondrial inner membrane, sarcolemma	mitochondrial inner membrane, mitochondrial matrix		mitochondrial inner membrane	mitochondrial inner membrane, mitochondrial matrix	T-tubule, sarcolemma				amino acid binding, carboxylic acid binding, enzyme binding, phospholipid binding, protein homodimerization activity, pyridoxal phosphate binding	L-aspartate:2-oxoglutarate aminotransferase activity, kynurenine-oxoglutarate transaminase activity							L-aspartate:2-oxoglutarate aminotransferase activity, amino acid binding, carboxylic acid binding, enzyme binding, kynurenine-oxoglutarate transaminase activity, phospholipid binding, protein homodimerization activity, pyridoxal phosphate binding
Cluster of Murinoglobulin-1 OS=Rattus norvegicus OX=10116 GN=Mug1 PE=2 SV=1 (MUG1_RAT)	MUG1_RAT [6]		negative regulation of endopeptidase activity		protein homotetramerization	embryonic liver development, luteinization			acute inflammatory response to antigenic stimulus					embryonic liver development, luteinization		luteinization	luteinization	acute inflammatory response to antigenic stimulus, acute-phase response, inflammatory response, response to carbon dioxide, response to glucocorticoid, response to nutrient, response to prostaglandin E, response to wounding	luteinization							extracellular space											brain-derived neurotrophic factor binding, nerve growth factor binding, protease binding, protein homodimerization activity						peptidase inhibitor activity, serine-type endopeptidase inhibitor activity		brain-derived neurotrophic factor binding, nerve growth factor binding, peptidase inhibitor activity, protease binding, protein homodimerization activity, serine-type endopeptidase inhibitor activity
Alpha-2-macroglobulin OS=Rattus norvegicus OX=10116 GN=A2m PE=2 SV=2	A2MG_RAT		negative regulation of endopeptidase activity		protein homotetramerization	embryonic liver development, luteinization			acute inflammatory response to antigenic stimulus					embryonic liver development, luteinization		luteinization	luteinization	acute inflammatory response to antigenic stimulus, acute-phase response, response to carbon dioxide, response to glucocorticoid, response to nutrient, response to prostaglandin E, response to wounding	luteinization							extracellular space											brain-derived neurotrophic factor binding, nerve growth factor binding, protease binding, protein homodimerization activity						serine-type endopeptidase inhibitor activity		brain-derived neurotrophic factor binding, nerve growth factor binding, protease binding, protein homodimerization activity, serine-type endopeptidase inhibitor activity
Uncharacterized protein OS=Rattus norvegicus OX=10116 PE=1 SV=3	G3V9J1_RAT
Murinoglobulin-2 OS=Rattus norvegicus OX=10116 GN=Mug2 PE=1 SV=1	MUG2_RAT																									extracellular space											protease binding						serine-type endopeptidase inhibitor activity		protease binding, serine-type endopeptidase inhibitor activity
Murinoglobulin-1 OS=Rattus norvegicus OX=10116 GN=Mug1 PE=2 SV=1	MUG1_RAT																	acute-phase response, inflammatory response								extracellular space											protease binding						peptidase inhibitor activity, serine-type endopeptidase inhibitor activity		peptidase inhibitor activity, protease binding, serine-type endopeptidase inhibitor activity
Alpha-1-inhibitor 3 OS=Rattus norvegicus OX=10116 GN=A1i3 PE=1 SV=1	A1I3_RAT																									extracellular space											protease binding						serine-type endopeptidase inhibitor activity		protease binding, serine-type endopeptidase inhibitor activity
Murinoglobulin-1 OS=Rattus norvegicus OX=10116 GN=LOC297568 PE=1 SV=3	D4AA52_RAT
Cytochrome c oxidase subunit OS=Rattus norvegicus OX=10116 GN=Cox6b1 PE=1 SV=1	D3ZD09_RAT
Periplakin OS=Rattus norvegicus OX=10116 GN=Ppl PE=1 SV=1	D4A5T8_RAT
Fibulin-5 OS=Rattus norvegicus OX=10116 GN=Fbln5 PE=2 SV=1	FBLN5_RAT	cell adhesion	regulation of cell growth, regulation of removal of superoxide radicals		elastic fiber assembly		secretion			protein localization to cell surface, secretion																elastic fiber, extracellular space											calcium ion binding, integrin binding, protein C-terminus binding, protein homodimerization activity								calcium ion binding, integrin binding, protein C-terminus binding, protein homodimerization activity
Coatomer subunit gamma OS=Rattus norvegicus OX=10116 GN=Copg1 PE=1 SV=1	A0A0G2K1F3_RAT (+1)
Myotrophin OS=Rattus norvegicus OX=10116 GN=Mtpn PE=1 SV=2	MTPN_RAT		positive regulation of NF-kappaB transcription factor activity, positive regulation of cardiac muscle hypertrophy, positive regulation of cell growth, positive regulation of macromolecule biosynthetic process, positive regulation of protein metabolic process, regulation of barbed-end actin filament capping, regulation of cell size		catecholamine metabolic process, cellular response to mechanical stimulus, cerebellar granule cell differentiation, neuron differentiation, regulation of barbed-end actin filament capping, regulation of cell size, striated muscle cell differentiation	cerebellar granule cell differentiation, neuron differentiation, skeletal muscle tissue regeneration, striated muscle cell differentiation		skeletal muscle tissue regeneration				catecholamine metabolic process		cerebellar granule cell differentiation, neuron differentiation				cellular response to mechanical stimulus, skeletal muscle tissue regeneration				cytosol, perinuclear region of cytoplasm	F-actin capping protein complex				F-actin capping protein complex, nucleus			nucleus		F-actin capping protein complex					sequence-specific DNA binding								sequence-specific DNA binding
Glutathione S-transferase P OS=Rattus norvegicus OX=10116 GN=Gstp1 PE=1 SV=2	GSTP1_RAT		negative regulation of ERK1 and ERK2 cascade, negative regulation of I-kappaB kinase/NF-kappaB signaling, negative regulation of JUN kinase activity, negative regulation of extrinsic apoptotic signaling pathway, negative regulation of fibroblast proliferation, negative regulation of interleukin-1 beta production, negative regulation of leukocyte proliferation, negative regulation of monocyte chem…		cellular response to cell-matrix adhesion, cellular response to epidermal growth factor stimulus, cellular response to glucocorticoid stimulus, cellular response to insulin stimulus, cellular response to lipopolysaccharide, glutathione metabolic process, linoleic acid metabolic process, oligodendrocyte development, xenobiotic metabolic process	animal organ regeneration, oligodendrocyte development						glutathione metabolic process, linoleic acid metabolic process, xenobiotic metabolic process	cellular response to lipopolysaccharide	animal organ regeneration, oligodendrocyte development				cellular response to cell-matrix adhesion, cellular response to epidermal growth factor stimulus, cellular response to glucocorticoid stimulus, cellular response to insulin stimulus, cellular response to lipopolysaccharide, response to L-ascorbic acid, response to amino acid, response to estradiol, response to ethanol, response to nutrient levels, response to reactive oxygen species, response to …				cytoplasm, cytosol, mitochondrion					mitochondrion, nucleus	plasma membrane	mitochondrion	nucleus			plasma membrane		glutathione peroxidase activity		JUN kinase binding, S-nitrosoglutathione binding, dinitrosyl-iron complex binding, drug binding, glutathione binding, protein kinase binding	glutathione peroxidase activity, glutathione transferase activity					kinase regulator activity		JUN kinase binding, S-nitrosoglutathione binding, dinitrosyl-iron complex binding, drug binding, glutathione binding, glutathione peroxidase activity, glutathione transferase activity, kinase regulator activity, protein kinase binding
Na(+)/H(+) exchange regulatory cofactor NHE-RF1 OS=Rattus norvegicus OX=10116 GN=Slc9a3r1 PE=1 SV=3	NHRF1_RAT		Wnt signaling pathway, adenylate cyclase-activating dopamine receptor signaling pathway, cellular phosphate ion homeostasis, negative regulation of ERK1 and ERK2 cascade, negative regulation of canonical Wnt signaling pathway, negative regulation of cell migration, negative regulation of cell motility, negative regulation of cell proliferation, negative regulation of mitotic cell cycle, negative …		Wnt signaling pathway, actin cytoskeleton organization, adenylate cyclase-activating dopamine receptor signaling pathway, auditory receptor cell stereocilium organization, cellular phosphate ion homeostasis, establishment of epithelial cell apical/basal polarity, microvillus assembly, phospholipase C-activating dopamine receptor signaling pathway, protein localization to plasma membrane, regulati…	auditory receptor cell stereocilium organization, establishment of epithelial cell apical/basal polarity, gland morphogenesis	bile acid secretion, establishment of Golgi localization, glutathione transport, nuclear migration, renal sodium ion transport			bile acid secretion, establishment of Golgi localization, glutathione transport, nuclear migration, protein localization to plasma membrane, renal sodium ion transport				auditory receptor cell stereocilium organization, gland morphogenesis, renal phosphate ion absorption, renal sodium ion transport, sensory perception of sound				Wnt signaling pathway, adenylate cyclase-activating dopamine receptor signaling pathway, phospholipase C-activating dopamine receptor signaling pathway				cytoplasm, perinuclear region of cytoplasm						apical plasma membrane, brush border membrane, membrane raft, microvillus membrane, plasma membrane				sperm midpiece, stereocilium tip	apical plasma membrane, brush border membrane, microvillus membrane, plasma membrane				PDZ domain binding, beta-2 adrenergic receptor binding, beta-catenin binding, binding, bridging, dopamine receptor binding, growth factor receptor binding, macromolecular complex binding, myosin II binding, phosphatase binding, protein N-terminus binding, protein domain specific binding, protein self-association								PDZ domain binding, beta-2 adrenergic receptor binding, beta-catenin binding, binding, bridging, chloride channel regulator activity, dopamine receptor binding, growth factor receptor binding, macromolecular complex binding, myosin II binding, phosphatase binding, protein N-terminus binding, protein domain specific binding, protein self-association
Cluster of Glutathione S-transferase omega-1 OS=Rattus norvegicus OX=10116 GN=Gsto1 PE=1 SV=2 (GSTO1_RAT)	GSTO1_RAT [3]				L-ascorbic acid biosynthetic process, cellular response to arsenic-containing substance, xenobiotic catabolic process							L-ascorbic acid biosynthetic process, oxidation-reduction process, xenobiotic catabolic process						cellular response to arsenic-containing substance, xenobiotic catabolic process				cytosol				basement membrane	nuclear membrane	nuclear membrane		nuclear membrane	nuclear membrane	nuclear membrane			glutathione dehydrogenase (ascorbate) activity			glutathione dehydrogenase (ascorbate) activity, glutathione transferase activity, methylarsonate reductase activity							glutathione dehydrogenase (ascorbate) activity, glutathione transferase activity, methylarsonate reductase activity
Glutathione S-transferase omega 1, isoform CRA_a OS=Rattus norvegicus OX=10116 GN=Gsto1 PE=1 SV=1	A0A096MJ04_RAT
Glutathione S-transferase omega-1 OS=Rattus norvegicus OX=10116 GN=Gsto1 PE=1 SV=2	GSTO1_RAT (+1)				L-ascorbic acid biosynthetic process, cellular response to arsenic-containing substance, xenobiotic catabolic process							L-ascorbic acid biosynthetic process, oxidation-reduction process, xenobiotic catabolic process						cellular response to arsenic-containing substance, xenobiotic catabolic process				cytosol				basement membrane	nuclear membrane	nuclear membrane		nuclear membrane	nuclear membrane	nuclear membrane			glutathione dehydrogenase (ascorbate) activity			glutathione dehydrogenase (ascorbate) activity, glutathione transferase activity, methylarsonate reductase activity							glutathione dehydrogenase (ascorbate) activity, glutathione transferase activity, methylarsonate reductase activity
Nuclear transport factor 2 OS=Rattus norvegicus OX=10116 GN=Nutf2 PE=1 SV=1	NTF2_RAT		negative regulation of vascular endothelial growth factor production, positive regulation of protein import into nucleus		protein localization to nuclear pore		mRNA transport, nucleocytoplasmic transport, protein export from nucleus, protein import into nucleus			mRNA transport, nucleocytoplasmic transport, protein export from nucleus, protein import into nucleus, protein localization to nuclear pore												cytosol					nuclear inner membrane, nuclear membrane, nuclear outer membrane, nuclear pore central transport channel, nucleoplasm	nuclear inner membrane, nuclear membrane, nuclear outer membrane		nuclear inner membrane, nuclear membrane, nuclear outer membrane, nuclear pore central transport channel, nucleoplasm	nuclear inner membrane, nuclear membrane, nuclear outer membrane	nuclear inner membrane, nuclear membrane, nuclear outer membrane, nuclear pore central transport channel, nucleoplasm					Ran GTPase binding, identical protein binding								Ran GTPase binding, identical protein binding, nuclear import signal receptor activity, structural constituent of nuclear pore
Histidine-rich glycoprotein OS=Rattus norvegicus OX=10116 GN=Hrg PE=1 SV=1	A0A0G2K3G0_RAT (+2)
Cluster of Hemoglobin subunit alpha-1/2 OS=Rattus norvegicus OX=10116 GN=Hba1 PE=1 SV=3 (HBA_RAT)	HBA_RAT [3]		negative regulation of blood pressure, regulation of sensory perception of pain		cellular oxidant detoxification, hydrogen peroxide catabolic process							hydrogen peroxide catabolic process		negative regulation of blood pressure				cellular oxidant detoxification				hemoglobin complex															beta-amyloid binding, heme binding, iron ion binding, organic acid binding, oxygen binding								beta-amyloid binding, heme binding, iron ion binding, organic acid binding, oxygen binding, oxygen transporter activity
Alpha globin OS=Rattus norvegicus OX=10116 GN=Hba-a3 PE=1 SV=2	Q63910_RAT
Globin c2 OS=Rattus norvegicus OX=10116 GN=Hba-a2 PE=1 SV=1	A0A0G2JSV6_RAT
Hemoglobin subunit alpha-1/2 OS=Rattus norvegicus OX=10116 GN=Hba1 PE=1 SV=3	HBA_RAT		negative regulation of blood pressure, regulation of sensory perception of pain		cellular oxidant detoxification, hydrogen peroxide catabolic process							hydrogen peroxide catabolic process		negative regulation of blood pressure				cellular oxidant detoxification				hemoglobin complex															beta-amyloid binding, heme binding, iron ion binding, organic acid binding, oxygen binding								beta-amyloid binding, heme binding, iron ion binding, organic acid binding, oxygen binding, oxygen transporter activity
CUB and zona pellucida-like domain-containing protein 1 OS=Rattus norvegicus OX=10116 GN=Cuzd1 PE=2 SV=2	CUZD1_RAT (+1)		hormone-mediated signaling pathway		hormone-mediated signaling pathway							trypsinogen activation	female pregnancy	female pregnancy		female pregnancy	female pregnancy	hormone-mediated signaling pathway				transport vesicle membrane, zymogen granule membrane					transport vesicle membrane, zymogen granule membrane	integral component of membrane, transport vesicle membrane, zymogen granule membrane			transport vesicle membrane, zymogen granule membrane	transport vesicle membrane, zymogen granule membrane
Mitogen-activated protein kinase 1 OS=Rattus norvegicus OX=10116 GN=Mapk1 PE=1 SV=3	MK01_RAT		B cell receptor signaling pathway, ERBB signaling pathway, ERK1 and ERK2 cascade, T cell receptor signaling pathway, intracellular signal transduction, lipopolysaccharide-mediated signaling pathway, long-term synaptic potentiation, negative regulation of cell differentiation, positive regulation of cardiac muscle cell proliferation, positive regulation of cell migration, positive regulation of pe…		B cell receptor signaling pathway, Bergmann glial cell differentiation, ERBB signaling pathway, ERK1 and ERK2 cascade, T cell receptor signaling pathway, apoptotic process, cardiac neural crest cell development involved in heart development, cell cycle, cellular response to DNA damage stimulus, cellular response to amino acid starvation, cellular response to cadmium ion, cellular response to dopa…	Bergmann glial cell differentiation, aging, cardiac neural crest cell development involved in heart development, decidualization, face development, labyrinthine layer blood vessel development, lung morphogenesis, mammary gland epithelial cell proliferation, outer ear morphogenesis, thymus development, thyroid gland development, trachea formation	caveolin-mediated endocytosis		B cell receptor signaling pathway, T cell receptor signaling pathway, thymus development	caveolin-mediated endocytosis		ERK1 and ERK2 cascade, cytosine metabolic process, diadenosine tetraphosphate biosynthetic process, peptidyl-serine phosphorylation, peptidyl-threonine phosphorylation, stress-activated MAPK cascade	decidualization, lipopolysaccharide-mediated signaling pathway	Bergmann glial cell differentiation, cardiac neural crest cell development involved in heart development, decidualization, labyrinthine layer blood vessel development, lung morphogenesis, mammary gland epithelial cell proliferation, outer ear morphogenesis, sensory perception of pain, thymus development, thyroid gland development, trachea formation		decidualization, labyrinthine layer blood vessel development	decidualization, labyrinthine layer blood vessel development	B cell receptor signaling pathway, ERBB signaling pathway, ERK1 and ERK2 cascade, T cell receptor signaling pathway, cellular response to DNA damage stimulus, cellular response to amino acid starvation, cellular response to cadmium ion, cellular response to dopamine, cellular response to granulocyte macrophage colony-stimulating factor stimulus, cellular response to organic substance, cellular re…			Golgi apparatus	Golgi apparatus, cytosol, dendrite cytoplasm, early endosome, late endosome, mitochondrion	microtubule organizing center, mitotic spindle		early endosome, late endosome		Golgi apparatus, cytoskeleton, early endosome, late endosome, microtubule organizing center, mitochondrion, mitotic spindle, nucleoplasm, nucleus	caveola, plasma membrane	mitochondrion	nucleoplasm		microtubule organizing center, mitotic spindle, nucleoplasm	caveola				ATP binding, double-stranded DNA binding, identical protein binding, mitogen-activated protein kinase kinase kinase binding, phosphatase binding, phosphotyrosine binding, transcription factor binding	MAP kinase activity, MAP kinase kinase activity, RNA polymerase II carboxy-terminal domain kinase activity							ATP binding, MAP kinase activity, MAP kinase kinase activity, RNA polymerase II carboxy-terminal domain kinase activity, double-stranded DNA binding, identical protein binding, mitogen-activated protein kinase kinase kinase binding, phosphatase binding, phosphotyrosine binding, transcription factor binding
Collagen, type VI, alpha 4 OS=Rattus norvegicus OX=10116 GN=Col6a4 PE=4 SV=3	F1M6H4_RAT
Coronin OS=Rattus norvegicus OX=10116 GN=Coro1c PE=1 SV=1	G3V624_RAT
NADH dehydrogenase [ubiquinone] flavoprotein 2, mitochondrial OS=Rattus norvegicus OX=10116 GN=Ndufv2 PE=1 SV=2	NDUV2_RAT				mitochondrial electron transport, NADH to ubiquinone	cardiac muscle tissue development, nervous system development						mitochondrial electron transport, NADH to ubiquinone		cardiac muscle tissue development, nervous system development								mitochondrial respiratory chain complex I					mitochondrial respiratory chain complex I	mitochondrial respiratory chain complex I	mitochondrial respiratory chain complex I		mitochondrial respiratory chain complex I	mitochondrial respiratory chain complex I					2 iron, 2 sulfur cluster binding, metal ion binding	NADH dehydrogenase (ubiquinone) activity							2 iron, 2 sulfur cluster binding, NADH dehydrogenase (ubiquinone) activity, metal ion binding
S-adenosylmethionine synthase OS=Rattus norvegicus OX=10116 GN=Mat2a PE=1 SV=2	F1LRB8_RAT (+1)
Heterogeneous nuclear ribonucleoprotein K OS=Rattus norvegicus OX=10116 GN=Hnrnpk PE=1 SV=1	HNRPK_RAT (+1)		cellular response to glucose stimulus, modulation of synaptic transmission, negative regulation of apoptotic process, negative regulation of branching morphogenesis of a nerve, negative regulation of mRNA splicing, via spliceosome, negative regulation of protein binding, negative regulation of transcription from RNA polymerase II promoter, positive regulation of RNA splicing, positive regulation …		RNA splicing, cellular response to amino acid stimulus, cellular response to forskolin, cellular response to glucose stimulus, cellular response to insulin stimulus, cellular response to rapamycin, mRNA processing, positive regulation of dendrite extension, positive regulation of dendritic spine development, positive regulation of neuron projection development	aging, camera-type eye development, central nervous system development, cerebellum development, cerebral cortex development, hippocampus development, kidney development, liver development, lung development, ovarian follicle development, peripheral nervous system development, positive regulation of dendrite extension, positive regulation of dendritic spine development, positive regulation of neuro…			thymus development			RNA splicing, mRNA processing		camera-type eye development, central nervous system development, cerebellum development, cerebral cortex development, hippocampus development, kidney development, liver development, lung development, ovarian follicle development, peripheral nervous system development, positive regulation of dendrite extension, positive regulation of dendritic spine development, positive regulation of neuron proje…		ovarian follicle development	ovarian follicle development	acute-phase response, cellular response to amino acid stimulus, cellular response to forskolin, cellular response to glucose stimulus, cellular response to insulin stimulus, cellular response to rapamycin, response to activity, response to salt	ovarian follicle development			cell cortex, cytoplasmic stress granule, cytosol, mitochondrion	podosome				catalytic step 2 spliceosome, cytoplasmic stress granule, mitochondrion, nuclear chromatin, nucleoplasm, nucleus, podosome		mitochondrion	catalytic step 2 spliceosome, nuclear chromatin, nucleoplasm		catalytic step 2 spliceosome, nuclear chromatin, nucleoplasm, podosome					ATPase binding, C-rich single-stranded DNA binding, RNA polymerase II core promoter proximal region sequence-specific DNA binding, actinin binding, core promoter proximal region sequence-specific DNA binding, double-stranded DNA binding, heat shock protein binding, identical protein binding, lamin binding, mRNA 3'-UTR binding, mRNA CDS binding, pre-mRNA 3'-splice site binding, protein domain spec…								ATPase binding, C-rich single-stranded DNA binding, RNA polymerase II core promoter proximal region sequence-specific DNA binding, actinin binding, core promoter proximal region sequence-specific DNA binding, double-stranded DNA binding, heat shock protein binding, identical protein binding, lamin binding, mRNA 3'-UTR binding, mRNA CDS binding, pre-mRNA 3'-splice site binding, protein domain spec…
Carboxypeptidase Q OS=Rattus norvegicus OX=10116 GN=Cpq PE=1 SV=1	CBPQ_RAT		thyroid hormone generation		peptide catabolic process, thyroid hormone generation	tissue regeneration		tissue regeneration				peptide catabolic process, proteolysis, thyroid hormone generation						tissue regeneration			Golgi apparatus	Golgi apparatus, endoplasmic reticulum, lysosome		endoplasmic reticulum		extracellular space	Golgi apparatus, endoplasmic reticulum, lysosome										metal ion binding, protein homodimerization activity	carboxypeptidase activity, metallodipeptidase activity							carboxypeptidase activity, metal ion binding, metallodipeptidase activity, protein homodimerization activity
Apolipoprotein A-IV OS=Rattus norvegicus OX=10116 GN=Apoa4 PE=1 SV=1	A0A0G2JVX7_RAT (+1)
Fc fragment of IgG-binding protein OS=Rattus norvegicus OX=10116 GN=Fcgbp PE=1 SV=3	D3ZJF8_RAT
Rho family-interacting cell polarization regulator 2 OS=Rattus norvegicus OX=10116 GN=Ripor2 PE=1 SV=1	RIPR2_RAT	cell adhesion	cellular iron ion homeostasis, negative regulation of Rho guanyl-nucleotide exchange factor activity, negative regulation of Rho protein signal transduction, negative regulation of T cell migration, negative regulation of cell adhesion, negative regulation of establishment of T cell polarity, negative regulation of protein localization to cell leading edge, positive regulation of filopodium assem…		cellular iron ion homeostasis, cellular response to chemokine, skeletal muscle fiber development	skeletal muscle fiber development					chemotaxis			sensory perception of sound, skeletal muscle fiber development				cellular response to chemokine, chemotaxis				cytoplasm	cytoskeleton				cytoskeleton	apical plasma membrane, stereocilium membrane				stereocilium, stereocilium membrane	apical plasma membrane, stereocilium membrane				14-3-3 protein binding, ferric iron binding								14-3-3 protein binding, ferric iron binding
RCG55135, isoform CRA_b OS=Rattus norvegicus OX=10116 GN=Tln1 PE=1 SV=1	G3V852_RAT
Collagen type VI alpha 2 chain OS=Rattus norvegicus OX=10116 GN=Col6a2 PE=1 SV=2	F1LNH3_RAT
Uncharacterized protein OS=Rattus norvegicus OX=10116 GN=Rps10l1 PE=4 SV=2	F1LT36_RAT
Parathymosin OS=Rattus norvegicus OX=10116 GN=Ptms PE=1 SV=2	PTMS_RAT								immune system process													cytosol															zinc ion binding						enzyme inhibitor activity		enzyme inhibitor activity, zinc ion binding
Barrier-to-autointegration factor OS=Rattus norvegicus OX=10116 GN=Banf1 PE=1 SV=1	BAF_RAT		negative regulation of viral genome replication		DNA integration, chromosome condensation, chromosome segregation							DNA integration										cytosol					condensed chromosome, nuclear envelope, nucleoplasm, nucleus			nuclear envelope, nucleoplasm		nuclear envelope, nucleoplasm					DNA binding, LEM domain binding, enzyme binding, protein C-terminus binding, protein N-terminus binding, protein homodimerization activity								DNA binding, LEM domain binding, enzyme binding, protein C-terminus binding, protein N-terminus binding, protein homodimerization activity
Lymphocyte specific 1, isoform CRA_a OS=Rattus norvegicus OX=10116 GN=Lsp1 PE=1 SV=1	Q4QQV6_RAT
Carboxylic ester hydrolase OS=Rattus norvegicus OX=10116 GN=Ces1c PE=1 SV=3	D3ZGK7_RAT (+1)
Proteasome subunit alpha type-2 OS=Rattus norvegicus OX=10116 GN=Psma2 PE=1 SV=3	PSA2_RAT				proteasomal ubiquitin-independent protein catabolic process, proteasome-mediated ubiquitin-dependent protein catabolic process							proteasomal ubiquitin-independent protein catabolic process, proteasome-mediated ubiquitin-dependent protein catabolic process										P-body					P-body, nucleus			nucleus								endopeptidase activity, threonine-type endopeptidase activity							endopeptidase activity, threonine-type endopeptidase activity
Protein disulfide-isomerase OS=Rattus norvegicus OX=10116 GN=P4hb PE=1 SV=2	PDIA1_RAT		cell redox homeostasis, positive regulation of viral entry into host cell, regulation of oxidative stress-induced intrinsic apoptotic signaling pathway		cell redox homeostasis, cellular response to hypoxia, cellular response to interleukin-7, peptidyl-proline hydroxylation to 4-hydroxy-L-proline, protein folding, response to endoplasmic reticulum stress							peptidyl-proline hydroxylation to 4-hydroxy-L-proline						cellular response to hypoxia, cellular response to interleukin-7, response to endoplasmic reticulum stress				endoplasmic reticulum, endoplasmic reticulum chaperone complex, endoplasmic reticulum lumen, endoplasmic reticulum-Golgi intermediate compartment, melanosome, procollagen-proline 4-dioxygenase complex		endoplasmic reticulum chaperone complex, endoplasmic reticulum lumen, procollagen-proline 4-dioxygenase complex			endoplasmic reticulum, endoplasmic reticulum chaperone complex, endoplasmic reticulum lumen, endoplasmic reticulum-Golgi intermediate compartment, melanosome, procollagen-proline 4-dioxygenase complex	external side of plasma membrane				endoplasmic reticulum chaperone complex, endoplasmic reticulum lumen, procollagen-proline 4-dioxygenase complex	external side of plasma membrane				enzyme binding, integrin binding, protein heterodimerization activity	peptide disulfide oxidoreductase activity, procollagen-proline 4-dioxygenase activity, protein disulfide isomerase activity							enzyme binding, integrin binding, peptide disulfide oxidoreductase activity, procollagen-proline 4-dioxygenase activity, protein disulfide isomerase activity, protein heterodimerization activity
Electron transfer flavoprotein subunit alpha, mitochondrial OS=Rattus norvegicus OX=10116 GN=Etfa PE=1 SV=4	ETFA_RAT				fatty acid beta-oxidation using acyl-CoA dehydrogenase							fatty acid beta-oxidation using acyl-CoA dehydrogenase										mitochondrial matrix, mitochondrion					mitochondrial matrix, mitochondrion		mitochondrial matrix			mitochondrial matrix					flavin adenine dinucleotide binding	oxidoreductase activity				electron carrier activity			electron carrier activity, flavin adenine dinucleotide binding, oxidoreductase activity
Apolipoprotein A-II OS=Rattus norvegicus OX=10116 GN=Apoa2 PE=2 SV=1	APOA2_RAT		cholesterol homeostasis, high-density lipoprotein particle assembly, high-density lipoprotein particle clearance, high-density lipoprotein particle remodeling, low-density lipoprotein particle remodeling, negative regulation of cholesterol import, negative regulation of cholesterol transporter activity, negative regulation of cytokine secretion involved in immune response, negative regulation of …		diacylglycerol catabolic process, high-density lipoprotein particle assembly, high-density lipoprotein particle remodeling, low-density lipoprotein particle remodeling, peptidyl-methionine modification, phosphatidylcholine biosynthetic process, phospholipid catabolic process, protein oxidation, triglyceride-rich lipoprotein particle remodeling	animal organ regeneration	cholesterol efflux, phospholipid efflux, reverse cholesterol transport			cholesterol efflux, phospholipid efflux, reverse cholesterol transport		cholesterol metabolic process, diacylglycerol catabolic process, lipoprotein metabolic process, peptidyl-methionine modification, phosphatidylcholine biosynthetic process, phospholipid catabolic process, protein oxidation		animal organ regeneration, high-density lipoprotein particle assembly, high-density lipoprotein particle clearance, high-density lipoprotein particle remodeling, low-density lipoprotein particle remodeling, triglyceride-rich lipoprotein particle remodeling				acute inflammatory response, response to drug, response to estrogen, response to glucocorticoid, response to glucose								chylomicron, spherical high-density lipoprotein particle, very-low-density lipoprotein particle											apolipoprotein receptor binding, cholesterol binding, heat shock protein binding, high-density lipoprotein particle binding, high-density lipoprotein particle receptor binding, phosphatidylcholine binding, protein heterodimerization activity, protein homodimerization activity						lipase inhibitor activity, phosphatidylcholine-sterol O-acyltransferase activator activity		apolipoprotein receptor binding, cholesterol binding, heat shock protein binding, high-density lipoprotein particle binding, high-density lipoprotein particle receptor binding, lipase inhibitor activity, phosphatidylcholine binding, phosphatidylcholine-sterol O-acyltransferase activator activity, protein heterodimerization activity, protein homodimerization activity
T-complex protein 1 subunit epsilon OS=Rattus norvegicus OX=10116 GN=Cct5 PE=1 SV=1	TCPE_RAT		positive regulation of establishment of protein localization to telomere, positive regulation of telomere maintenance via telomerase, protein stabilization		binding of sperm to zona pellucida, protein folding, response to virus		toxin transport			toxin transport			binding of sperm to zona pellucida, response to virus			binding of sperm to zona pellucida	binding of sperm to zona pellucida	response to virus		response to virus		chaperonin-containing T-complex	centrosome, microtubule				centrosome, microtubule, nucleolus			nucleolus		centrosome, microtubule, nucleolus					ATP binding, G-protein beta-subunit binding, beta-tubulin binding, mRNA 3'-UTR binding, mRNA 5'-UTR binding, unfolded protein binding								ATP binding, G-protein beta-subunit binding, beta-tubulin binding, mRNA 3'-UTR binding, mRNA 5'-UTR binding, unfolded protein binding
Cluster of Plastin 1 OS=Rattus norvegicus OX=10116 GN=Pls1 PE=1 SV=1 (A0A0G2QC04_RAT)	A0A0G2QC04_RAT [3]
Plastin 3 (T-isoform), isoform CRA_a OS=Rattus norvegicus OX=10116 GN=Pls3 PE=1 SV=2	F1LPK7_RAT (+1)
Plastin 1 OS=Rattus norvegicus OX=10116 GN=Pls1 PE=1 SV=1	A0A0G2QC04_RAT
Transforming protein RhoA OS=Rattus norvegicus OX=10116 GN=Rhoa PE=1 SV=1	RHOA_RAT	cell-matrix adhesion	Rho protein signal transduction, Roundabout signaling pathway, androgen receptor signaling pathway, angiotensin-mediated vasoconstriction involved in regulation of systemic arterial blood pressure, apolipoprotein A-I-mediated signaling pathway, negative regulation of I-kappaB kinase/NF-kappaB signaling, negative regulation of cell death, negative regulation of cell migration involved in sprouting…		GTP metabolic process, Rho protein signal transduction, Roundabout signaling pathway, actin cytoskeleton reorganization, actin filament organization, alpha-beta T cell lineage commitment, androgen receptor signaling pathway, apical junction assembly, apolipoprotein A-I-mediated signaling pathway, beta selection, cell junction assembly, cellular response to chemokine, cellular response to lipopoly…	alpha-beta T cell lineage commitment, beta selection, cerebral cortex cell migration, endothelial tube lumen extension, establishment of epithelial cell apical/basal polarity, forebrain radial glial cell differentiation, negative regulation of neuron differentiation, negative regulation of neuron projection development, neuron projection morphogenesis, odontogenesis, ossification involved in bone…			alpha-beta T cell lineage commitment, beta selection	cerebral cortex cell migration, endothelial cell migration, skeletal muscle satellite cell migration, wound healing, spreading of cells	cerebral cortex cell migration, endothelial cell migration, negative chemotaxis, skeletal muscle satellite cell migration, wound healing, spreading of cells	GTP metabolic process	cellular response to lipopolysaccharide	alpha-beta T cell lineage commitment, angiotensin-mediated vasoconstriction involved in regulation of systemic arterial blood pressure, beta selection, cerebral cortex cell migration, endothelial cell migration, endothelial tube lumen extension, forebrain radial glial cell differentiation, negative regulation of neuron differentiation, negative regulation of neuron projection development, neuron …				Rho protein signal transduction, Roundabout signaling pathway, androgen receptor signaling pathway, apolipoprotein A-I-mediated signaling pathway, cellular response to chemokine, cellular response to lipopolysaccharide, cellular response to progesterone stimulus, negative chemotaxis, response to amino acid, response to drug, response to ethanol, response to glucocorticoid, response to glucose, re…				cell cortex, cytosol, endosome	cytoskeleton		endosome		cytoskeleton, endosome, nucleus	extrinsic component of cytoplasmic side of plasma membrane, ruffle membrane		nucleus			extrinsic component of cytoplasmic side of plasma membrane, ruffle membrane				GDP binding, GTP binding, Rho GDP-dissociation inhibitor binding, myosin binding, protein domain specific binding, protein kinase binding	GTPase activity							GDP binding, GTP binding, GTPase activity, Rho GDP-dissociation inhibitor binding, myosin binding, protein domain specific binding, protein kinase binding
Fumarate hydratase, mitochondrial OS=Rattus norvegicus OX=10116 GN=Fh PE=1 SV=2	FUMH_RAT		homeostasis of number of cells within a tissue, negative regulation of histone H3-K36 methylation, positive regulation of double-strand break repair via nonhomologous end joining, regulation of arginine metabolic process		DNA repair, cellular response to DNA damage stimulus, fumarate metabolic process, malate metabolic process, tricarboxylic acid cycle, urea cycle							DNA repair, fumarate metabolic process, malate metabolic process, tricarboxylic acid cycle, urea cycle		homeostasis of number of cells within a tissue				DNA repair				cytosol, mitochondrion, tricarboxylic acid cycle enzyme complex					chromosome, mitochondrion, nucleus		mitochondrion	nucleus								fumarate hydratase activity							fumarate hydratase activity
Cluster of RAB5B, member RAS oncogene family OS=Rattus norvegicus OX=10116 GN=Rab5b PE=1 SV=1 (A1L1J8_RAT)	A1L1J8_RAT [2]
RAB5C, member RAS oncogene family OS=Rattus norvegicus OX=10116 GN=Rab5c PE=1 SV=1	B0BNK1_RAT
RAB5B, member RAS oncogene family OS=Rattus norvegicus OX=10116 GN=Rab5b PE=1 SV=1	A1L1J8_RAT
Procollagen-lysine,2-oxoglutarate 5-dioxygenase 2 OS=Rattus norvegicus OX=10116 GN=Plod2 PE=4 SV=1	A0A0G2JVA4_RAT (+2)
Heat shock protein HSP 90-alpha OS=Rattus norvegicus OX=10116 GN=Hsp90aa1 PE=1 SV=3	HS90A_RAT		positive regulation of cardiac muscle contraction, positive regulation of cell size, positive regulation of lamellipodium assembly, positive regulation of nitric oxide biosynthetic process, protein stabilization, regulation of protein complex stability		cardiac muscle cell apoptotic process, cellular response to heat, chaperone-mediated protein transport involved in chaperone-mediated autophagy, neuron migration, positive regulation of cell size, protein folding	neuron migration	chaperone-mediated protein transport involved in chaperone-mediated autophagy			chaperone-mediated protein transport involved in chaperone-mediated autophagy, neuron migration	neuron migration	chaperone-mediated protein transport involved in chaperone-mediated autophagy		neuron migration, skeletal muscle contraction				cellular response to heat, response to antibiotic, response to cocaine, response to cold, response to drug, response to estrogen, response to heat, response to salt stress				cytosol, lysosomal membrane, melanosome, perinuclear region of cytoplasm					lysosomal membrane, melanosome, nucleus	apical plasma membrane, basolateral plasma membrane, brush border membrane, lysosomal membrane, plasma membrane, sperm plasma membrane		nucleus	lysosomal membrane	lysosomal membrane, sperm mitochondrial sheath	apical plasma membrane, basolateral plasma membrane, brush border membrane, plasma membrane, sperm plasma membrane				ATP binding, CTP binding, GTP binding, Rho GDP-dissociation inhibitor binding, TPR domain binding, UTP binding, dATP binding, disordered domain specific binding, ion channel binding, mRNA binding, protein phosphatase binding, sulfonylurea receptor binding, tau protein binding, unfolded protein binding	ATPase activity					nitric-oxide synthase regulator activity		ATP binding, ATPase activity, CTP binding, GTP binding, Rho GDP-dissociation inhibitor binding, TPR domain binding, UTP binding, dATP binding, disordered domain specific binding, ion channel binding, mRNA binding, nitric-oxide synthase regulator activity, protein phosphatase binding, sulfonylurea receptor binding, tau protein binding, unfolded protein binding
Alpha-parvin OS=Rattus norvegicus OX=10116 GN=Parva PE=1 SV=1	G3V818_RAT (+1)
Aldo-keto reductase family 1, member B8 OS=Rattus norvegicus OX=10116 GN=Akr1b8 PE=1 SV=1	G3V786_RAT
Ras suppressor protein 1 OS=Rattus norvegicus OX=10116 GN=Rsu1 PE=1 SV=3	D4A8F2_RAT
Proteasome subunit alpha type-3 OS=Rattus norvegicus OX=10116 GN=Psma3 PE=1 SV=3	PSA3_RAT		regulation of endopeptidase activity		proteasomal protein catabolic process, proteasomal ubiquitin-independent protein catabolic process, proteasome-mediated ubiquitin-dependent protein catabolic process							proteasomal protein catabolic process, proteasomal ubiquitin-independent protein catabolic process, proteasome-mediated ubiquitin-dependent protein catabolic process										cytoplasm					nucleus			nucleus							ubiquitin protein ligase binding	endopeptidase activity, threonine-type endopeptidase activity							endopeptidase activity, threonine-type endopeptidase activity, ubiquitin protein ligase binding
Fibrinogen gamma chain OS=Rattus norvegicus OX=10116 GN=Fgg PE=1 SV=3	FIBG_RAT	cell-matrix adhesion, platelet aggregation	blood coagulation, fibrin clot formation, fibrinolysis, negative regulation of endothelial cell apoptotic process, negative regulation of extrinsic apoptotic signaling pathway via death domain receptors, negative regulation of platelet aggregation, platelet aggregation, positive regulation of ERK1 and ERK2 cascade, positive regulation of exocytosis, positive regulation of heterotypic cell-cell ad…		cellular response to interleukin-1, cellular response to interleukin-6, platelet aggregation, platelet maturation, protein polymerization, protein secretion	platelet maturation	protein secretion			protein secretion		blood coagulation, fibrin clot formation, plasminogen activation		blood coagulation, fibrin clot formation, platelet aggregation, positive regulation of vasoconstriction				blood coagulation, fibrin clot formation, cellular response to interleukin-1, cellular response to interleukin-6, platelet aggregation, response to calcium ion				cytoplasm, platelet alpha granule				blood microparticle, fibrinogen complex	platelet alpha granule	external side of plasma membrane					external side of plasma membrane				cell adhesion molecule binding, metal ion binding, protein homodimerization activity, receptor binding								cell adhesion molecule binding, metal ion binding, protein homodimerization activity, receptor binding, structural molecule activity
Cytoplasmic aconitate hydratase OS=Rattus norvegicus OX=10116 GN=Aco1 PE=1 SV=1	ACOC_RAT (+1)		cellular iron ion homeostasis		cellular iron ion homeostasis, tricarboxylic acid cycle	liver development						tricarboxylic acid cycle		liver development				response to iron(II) ion			Golgi apparatus	Golgi apparatus, cytosol, endoplasmic reticulum, mitochondrion		endoplasmic reticulum			Golgi apparatus, endoplasmic reticulum, mitochondrion		mitochondrion								3 iron, 4 sulfur cluster binding, 4 iron, 4 sulfur cluster binding, iron-responsive element binding, mRNA 5'-UTR binding, metal ion binding	aconitate hydratase activity							3 iron, 4 sulfur cluster binding, 4 iron, 4 sulfur cluster binding, aconitate hydratase activity, iron-responsive element binding, mRNA 5'-UTR binding, metal ion binding
Microtubule-associated scaffold protein 2 OS=Rattus norvegicus OX=10116 GN=Mtus2 PE=1 SV=1	A0A0G2K4U7_RAT
sp|P02454|CO1A1_RAT-DECOY Collagen alpha-1(I) chain OS=Rattus norvegicus OX=10116...	CO1A1_RAT-DECOY
Inositol-1-monophosphatase OS=Rattus norvegicus OX=10116 GN=Impa1 PE=1 SV=1	F1M978_RAT (+1)
Cluster of Uncharacterized protein OS=Rattus norvegicus OX=10116 PE=4 SV=1 (D3ZE63_RAT)	D3ZE63_RAT [3]
Uncharacterized protein OS=Rattus norvegicus OX=10116 PE=4 SV=1	D3ZE63_RAT (+1)
Uncharacterized protein OS=Rattus norvegicus OX=10116 PE=4 SV=1	F1LTZ6_RAT
Rab GDP dissociation inhibitor alpha OS=Rattus norvegicus OX=10116 GN=Gdi1 PE=1 SV=1	GDIA_RAT		Rab protein signal transduction, negative regulation of axonogenesis, negative regulation of protein targeting to membrane, positive regulation of axon extension		Rab protein signal transduction, negative regulation of axonogenesis, positive regulation of axon extension	negative regulation of axonogenesis, positive regulation of axon extension	protein transport, vesicle-mediated transport			protein transport, vesicle-mediated transport				negative regulation of axonogenesis, positive regulation of axon extension				Rab protein signal transduction, response to calcium ion			Golgi apparatus	Golgi apparatus					Golgi apparatus										Rab GTPase binding						GTPase activator activity, Rab GDP-dissociation inhibitor activity		GTPase activator activity, Rab GDP-dissociation inhibitor activity, Rab GTPase binding
Spectrin beta chain OS=Rattus norvegicus OX=10116 GN=Sptbn1 PE=1 SV=1	A0A0G2JZY6_RAT (+2)
Fermitin family homolog 2 (Drosophila) OS=Rattus norvegicus OX=10116 GN=Fermt2 PE=1 SV=1	Q5XI19_RAT
Collagen alpha-1(XII) chain OS=Rattus norvegicus OX=10116 GN=Col12a1 PE=1 SV=1	A0A0G2KAJ7_RAT
Dynein light chain 1, cytoplasmic OS=Rattus norvegicus OX=10116 GN=Dynll1 PE=1 SV=1	DYL1_RAT		neurotransmitter metabolic process, positive regulation of ATP-dependent microtubule motor activity, plus-end-directed, positive regulation of insulin secretion involved in cellular response to glucose stimulus		apoptotic process, microtubule-based process, neurotransmitter metabolic process, nitric oxide biosynthetic process, spermatid development	spermatid development						neurotransmitter metabolic process, nitric oxide biosynthetic process	spermatid development	spermatid development		spermatid development	spermatid development					axon cytoplasm, mitochondrion, secretory granule	cytoplasmic dynein complex, microtubule, mitotic spindle				cytoplasmic dynein complex, kinetochore, microtubule, mitochondrion, mitotic spindle, nucleus, secretory granule		mitochondrion	nucleus		cytoplasmic dynein complex, kinetochore, microtubule, mitotic spindle					dynein intermediate chain binding, dynein light intermediate chain binding, enzyme binding, protein heterodimerization activity, protein homodimerization activity, scaffold protein binding	motor activity					enzyme inhibitor activity, nitric-oxide synthase regulator activity		dynein intermediate chain binding, dynein light intermediate chain binding, enzyme binding, enzyme inhibitor activity, motor activity, nitric-oxide synthase regulator activity, protein heterodimerization activity, protein homodimerization activity, scaffold protein binding		motor activity
T-complex protein 1 subunit delta OS=Rattus norvegicus OX=10116 GN=Cct4 PE=1 SV=3	TCPD_RAT		positive regulation of establishment of protein localization to telomere, positive regulation of telomerase RNA localization to Cajal body, positive regulation of telomerase activity, positive regulation of telomere maintenance via telomerase, protein stabilization		binding of sperm to zona pellucida, protein folding		toxin transport			scaRNA localization to Cajal body, toxin transport			binding of sperm to zona pellucida			binding of sperm to zona pellucida	binding of sperm to zona pellucida					chaperonin-containing T-complex, melanosome	centrosome, microtubule				centrosome, melanosome, microtubule, nucleoplasm			nucleoplasm		centrosome, microtubule, nucleoplasm					ATP binding, unfolded protein binding								ATP binding, unfolded protein binding
Uncharacterized protein OS=Rattus norvegicus OX=10116 PE=1 SV=3	F1LTJ5_RAT
60 kDa heat shock protein, mitochondrial OS=Rattus norvegicus OX=10116 GN=Hspd1 PE=1 SV=1	CH60_RAT		negative regulation of apoptotic process in bone marrow, negative regulation of neuron apoptotic process, negative regulation of reactive oxygen species biosynthetic process, positive regulation of T cell activation, positive regulation of inflammatory response, positive regulation of interferon-alpha production, positive regulation of interferon-gamma production, positive regulation of interleuk…		'de novo' protein folding, T cell activation, apoptotic mitochondrial changes, cellular response to heat, cellular response to interleukin-7, protein import into mitochondrial intermembrane space, protein refolding		protein import into mitochondrial intermembrane space		T cell activation	protein import into mitochondrial intermembrane space			response to lipopolysaccharide					cellular response to heat, cellular response to interleukin-7, response to ATP, response to activity, response to cocaine, response to cold, response to drug, response to estrogen, response to glucocorticoid, response to heat, response to hydrogen peroxide, response to hypoxia, response to ischemia, response to lipopolysaccharide, response to organic cyclic compound, response to organic substance			Golgi apparatus	Golgi apparatus, cytosol, mitochondrial crista, mitochondrial inner membrane, mitochondrial matrix, mitochondrion, peroxisomal matrix, rough endoplasmic reticulum, zymogen granule		rough endoplasmic reticulum		extracellular space	Golgi apparatus, mitochondrial crista, mitochondrial inner membrane, mitochondrial matrix, mitochondrion, peroxisomal matrix, rough endoplasmic reticulum, zymogen granule	membrane raft, mitochondrial crista, mitochondrial inner membrane, plasma membrane	mitochondrial crista, mitochondrial inner membrane, mitochondrial matrix		mitochondrial crista, mitochondrial inner membrane	mitochondrial crista, mitochondrial inner membrane, mitochondrial matrix, peroxisomal matrix	plasma membrane				ATP binding, insulin binding, lipopolysaccharide binding, macromolecular complex binding, protease binding, protein heterodimerization activity, unfolded protein binding	isomerase activity							ATP binding, insulin binding, isomerase activity, lipopolysaccharide binding, macromolecular complex binding, protease binding, protein heterodimerization activity, unfolded protein binding
IQ motif containing GTPase activating protein 1 (Predicted), isoform CRA_b OS=Rattus norvegicus OX=10116 GN=Iqgap1 PE=1 SV=1	G3V7Q7_RAT
ATP synthase subunit delta, mitochondrial OS=Rattus norvegicus OX=10116 GN=Atp5f1d PE=1 SV=1	G3V7Y3_RAT
Transgelin OS=Rattus norvegicus OX=10116 GN=Tagln PE=1 SV=2	TAGL_RAT																					cytoplasm															actin filament binding, protein binding, bridging								actin filament binding, protein binding, bridging
40S ribosomal protein S28 OS=Rattus norvegicus OX=10116 GN=Rps28 PE=1 SV=1	RS28_RAT				cytoplasmic translation, maturation of SSU-rRNA, ribosomal small subunit assembly							cytoplasmic translation, maturation of SSU-rRNA										cytoplasmic side of rough endoplasmic reticulum membrane, cytosolic small ribosomal subunit, polysomal ribosome		cytoplasmic side of rough endoplasmic reticulum membrane			cytoplasmic side of rough endoplasmic reticulum membrane, cytosolic small ribosomal subunit, polysomal ribosome	cytoplasmic side of rough endoplasmic reticulum membrane			cytoplasmic side of rough endoplasmic reticulum membrane	cytoplasmic side of rough endoplasmic reticulum membrane, cytosolic small ribosomal subunit		cytosolic small ribosomal subunit, polysomal ribosome			RNA binding								RNA binding, structural constituent of ribosome
40S ribosomal protein S7 OS=Rattus norvegicus OX=10116 GN=Rps7 PE=1 SV=1	RS7_RAT				rRNA processing, translation							rRNA processing, translation										cytosolic small ribosomal subunit	microtubule organizing center				cytosolic small ribosomal subunit, microtubule organizing center					cytosolic small ribosomal subunit, microtubule organizing center		cytosolic small ribosomal subunit			poly(U) RNA binding								poly(U) RNA binding, structural constituent of ribosome
Elongation factor 2 OS=Rattus norvegicus OX=10116 GN=Eef2 PE=1 SV=4	EF2_RAT		positive regulation of cytoplasmic translation, positive regulation of translation		cellular response to brain-derived neurotrophic factor stimulus, glial cell proliferation, hematopoietic progenitor cell differentiation, response to endoplasmic reticulum stress, skeletal muscle cell differentiation, translational elongation	aging, glial cell proliferation, hematopoietic progenitor cell differentiation, skeletal muscle cell differentiation			hematopoietic progenitor cell differentiation			translational elongation		glial cell proliferation, hematopoietic progenitor cell differentiation, skeletal muscle cell differentiation, skeletal muscle contraction				cellular response to brain-derived neurotrophic factor stimulus, response to drug, response to endoplasmic reticulum stress, response to estradiol, response to ethanol, response to folic acid, response to hydrogen peroxide, response to ischemia				cytosol, polysomal ribosome					nucleus, polysomal ribosome	membrane raft, plasma membrane		nucleus			plasma membrane	polysomal ribosome			5S rRNA binding, GTP binding, actin filament binding, p53 binding, protein kinase binding, ribosome binding, translation elongation factor activity	GTPase activity							5S rRNA binding, GTP binding, GTPase activity, actin filament binding, p53 binding, protein kinase binding, ribosome binding, translation elongation factor activity
Filamin-C OS=Rattus norvegicus OX=10116 GN=Flnc PE=1 SV=1	A0A0H2UHR7_RAT (+1)
Calpain small subunit 1-like OS=Rattus norvegicus OX=10116 GN=Capns1 PE=1 SV=1	M0RD20_RAT
Cysteine and glycine-rich protein 1 OS=Rattus norvegicus OX=10116 GN=Csrp1 PE=1 SV=2	CSRP1_RAT				sarcomere organization	muscle tissue development, nervous system development, sarcomere organization								nervous system development								Z disc, cytoplasm					Z disc, nucleus			nucleus		Z disc					actinin binding, metal ion binding								actinin binding, metal ion binding, structural constituent of muscle
Cluster of Globin a4 OS=Rattus norvegicus OX=10116 GN=Hbb PE=1 SV=1 (A0A0G2JSW3_RAT)	A0A0G2JSW3_RAT [3]				cellular oxidant detoxification, hydrogen peroxide catabolic process							hydrogen peroxide catabolic process						cellular oxidant detoxification				hemoglobin complex															heme binding, hemoglobin alpha binding, metal ion binding, organic acid binding, oxygen binding								heme binding, hemoglobin alpha binding, metal ion binding, organic acid binding, oxygen binding, oxygen transporter activity
Globin a4 OS=Rattus norvegicus OX=10116 GN=Hbb PE=1 SV=1	A0A0G2JSW3_RAT
Beta-globin OS=Rattus norvegicus OX=10116 GN=LOC103694855 PE=1 SV=1	Q62669_RAT
Hemoglobin subunit beta-2 OS=Rattus norvegicus OX=10116 PE=1 SV=2	HBB2_RAT				cellular oxidant detoxification, hydrogen peroxide catabolic process							hydrogen peroxide catabolic process						cellular oxidant detoxification				hemoglobin complex															heme binding, hemoglobin alpha binding, metal ion binding, organic acid binding, oxygen binding								heme binding, hemoglobin alpha binding, metal ion binding, organic acid binding, oxygen binding, oxygen transporter activity
Caveolae-associated protein 2 OS=Rattus norvegicus OX=10116 GN=Cavin2 PE=1 SV=3	CAVN2_RAT				plasma membrane tubulation																	cytosol	actin cytoskeleton				actin cytoskeleton, nucleoplasm	caveola		nucleoplasm		nucleoplasm	caveola				phosphatidylserine binding, protein kinase C binding								phosphatidylserine binding, protein kinase C binding
Nidogen-1 OS=Rattus norvegicus OX=10116 GN=Nid1 PE=1 SV=1	F1LM84_RAT
Annexin OS=Rattus norvegicus OX=10116 GN=Anxa6 PE=1 SV=1	Q6IMZ3_RAT
Cysteine-rich protein 1 OS=Rattus norvegicus OX=10116 GN=Crip1 PE=1 SV=2	CRIP1_RAT		intrinsic apoptotic signaling pathway in response to DNA damage, regulation of gene expression		cellular response to UV-B, cellular response to antibiotic, intrinsic apoptotic signaling pathway in response to DNA damage	prostate gland stromal morphogenesis			immune response					prostate gland stromal morphogenesis		prostate gland stromal morphogenesis	prostate gland stromal morphogenesis	cellular response to UV-B, cellular response to antibiotic, immune response, intrinsic apoptotic signaling pathway in response to DNA damage, response to organic substance, response to zinc ion				cytoplasm															AT DNA binding, DNA binding, bending, peptide binding, zinc ion binding								AT DNA binding, DNA binding, bending, peptide binding, zinc ion binding
Stress-70 protein, mitochondrial OS=Rattus norvegicus OX=10116 GN=Hspa9 PE=1 SV=1	F1M953_RAT (+1)
Isocitrate dehydrogenase [NADP] cytoplasmic OS=Rattus norvegicus OX=10116 GN=Idh1 PE=1 SV=1	IDHC_RAT		regulation of phospholipid biosynthetic process, regulation of phospholipid catabolic process		2-oxoglutarate metabolic process, NADP metabolic process, glutathione metabolic process, glyoxylate cycle, isocitrate metabolic process, tricarboxylic acid cycle	female gonad development						2-oxoglutarate metabolic process, NADP metabolic process, glutathione metabolic process, glyoxylate cycle, isocitrate metabolic process, tricarboxylic acid cycle		female gonad development		female gonad development	female gonad development	response to organic cyclic compound, response to oxidative stress, response to steroid hormone				cytosol, mitochondrion, peroxisome					mitochondrion, peroxisome		mitochondrion								NAD binding, NADP binding, magnesium ion binding, protein homodimerization activity	isocitrate dehydrogenase (NADP+) activity							NAD binding, NADP binding, isocitrate dehydrogenase (NADP+) activity, magnesium ion binding, protein homodimerization activity
Cluster of Heat shock cognate 71 kDa protein OS=Rattus norvegicus OX=10116 GN=Hspa8 PE=1 SV=1 (HSP7C_RAT)	HSP7C_RAT [3]		negative regulation of cardiac muscle cell apoptotic process, negative regulation of hydrogen peroxide-induced cell death, negative regulation of inclusion body assembly, negative regulation of transcription, DNA-templated, positive regulation of ATPase activity, positive regulation of G2/M transition of mitotic cell cycle, positive regulation of T cell mediated cytotoxicity, positive regulation …		G1/S transition of mitotic cell cycle, RNA splicing, axo-dendritic transport, cellular protein complex disassembly, cellular response to cadmium ion, cellular response to heat, cellular response to unfolded protein, chaperone mediated protein folding requiring cofactor, chaperone-mediated autophagy translocation complex disassembly, chaperone-mediated protein folding, chaperone-mediated protein t…	aging, cerebellum development, forebrain development, kidney development, multicellular organism development, skeletal muscle tissue development, spermatid development	axo-dendritic transport, chaperone-mediated protein transport involved in chaperone-mediated autophagy, protein import into nucleus, protein targeting to lysosome involved in chaperone-mediated autophagy, protein transmembrane import into intracellular organelle, slow axonal transport, synaptic vesicle uncoating, vesicle-mediated transport			axo-dendritic transport, chaperone-mediated protein transport involved in chaperone-mediated autophagy, protein import into nucleus, protein targeting to lysosome involved in chaperone-mediated autophagy, protein transmembrane import into intracellular organelle, slow axonal transport, synaptic vesicle uncoating, vesicle-mediated transport		RNA splicing, chaperone-mediated protein transport involved in chaperone-mediated autophagy, late endosomal microautophagy, mRNA processing, protein autophosphorylation, protein targeting to lysosome involved in chaperone-mediated autophagy	spermatid development, spermatogenesis	cerebellum development, estrous cycle, forebrain development, kidney development, sensory perception of smell, skeletal muscle tissue development, spermatid development, spermatogenesis		estrous cycle, male meiosis I, spermatid development, spermatogenesis	estrous cycle, male meiosis I, spermatid development, spermatogenesis	cellular response to cadmium ion, cellular response to heat, cellular response to unfolded protein, response to activity, response to cold, response to drug, response to estradiol, response to ethanol, response to heat, response to nickel cation, response to odorant, response to progesterone, response to starvation	estrous cycle			autophagosome, lysosomal matrix, lysosomal membrane, lysosome, melanosome, perinuclear region of cytoplasm, postsynaptic cytosol, presynaptic cytosol, synaptic vesicle	intermediate filament, meiotic spindle, microtubule			extracellular exosome	autophagosome, intermediate filament, lysosomal matrix, lysosomal membrane, lysosome, male germ cell nucleus, meiotic spindle, melanosome, microtubule, nucleolus, nucleus, spliceosomal complex, synaptic vesicle, synaptonemal complex	CatSper complex, lysosomal membrane, membrane raft, plasma membrane		male germ cell nucleus, nucleolus, spliceosomal complex, synaptonemal complex	lysosomal membrane	intermediate filament, lysosomal matrix, lysosomal membrane, meiotic spindle, microtubule, nucleolus, spliceosomal complex, synaptonemal complex	CatSper complex				A1 adenosine receptor binding, ADP binding, ATP binding, RNA binding, chaperone binding, disordered domain specific binding, enzyme binding, glycolipid binding, heat shock protein binding, misfolded protein binding, peptide binding, prostaglandin binding, protein binding involved in protein folding, receptor binding, tau protein binding, transcription factor binding, unfolded protein binding	ATPase activity, coupled, clathrin-uncoating ATPase activity							A1 adenosine receptor binding, ADP binding, ATP binding, ATPase activity, coupled, RNA binding, chaperone binding, clathrin-uncoating ATPase activity, disordered domain specific binding, enzyme binding, glycolipid binding, heat shock protein binding, misfolded protein binding, peptide binding, prostaglandin binding, protein binding involved in protein folding, receptor binding, tau protein bindin…
Heat shock cognate 71 kDa protein OS=Rattus norvegicus OX=10116 GN=Hspa8 PE=1 SV=1	HSP7C_RAT		negative regulation of cardiac muscle cell apoptotic process, negative regulation of hydrogen peroxide-induced cell death, negative regulation of transcription, DNA-templated, positive regulation of T cell mediated cytotoxicity, positive regulation of catalytic activity, positive regulation of gene expression, positive regulation of lysosomal membrane permeability, positive regulation of phagocyt…		G1/S transition of mitotic cell cycle, RNA splicing, axo-dendritic transport, cellular protein complex disassembly, cellular response to cadmium ion, cellular response to heat, cellular response to unfolded protein, chaperone mediated protein folding requiring cofactor, chaperone-mediated autophagy translocation complex disassembly, chaperone-mediated protein folding, chaperone-mediated protein t…	aging, cerebellum development, forebrain development, kidney development, skeletal muscle tissue development	axo-dendritic transport, chaperone-mediated protein transport involved in chaperone-mediated autophagy, protein import into nucleus, protein targeting to lysosome involved in chaperone-mediated autophagy, protein transmembrane import into intracellular organelle, slow axonal transport, synaptic vesicle uncoating, vesicle-mediated transport			axo-dendritic transport, chaperone-mediated protein transport involved in chaperone-mediated autophagy, protein import into nucleus, protein targeting to lysosome involved in chaperone-mediated autophagy, protein transmembrane import into intracellular organelle, slow axonal transport, synaptic vesicle uncoating, vesicle-mediated transport		RNA splicing, chaperone-mediated protein transport involved in chaperone-mediated autophagy, late endosomal microautophagy, mRNA processing, protein autophosphorylation, protein targeting to lysosome involved in chaperone-mediated autophagy		cerebellum development, estrous cycle, forebrain development, kidney development, sensory perception of smell, skeletal muscle tissue development		estrous cycle	estrous cycle	cellular response to cadmium ion, cellular response to heat, cellular response to unfolded protein, response to activity, response to drug, response to estradiol, response to ethanol, response to heat, response to nickel cation, response to odorant, response to progesterone, response to starvation	estrous cycle			autophagosome, lysosomal matrix, lysosomal membrane, lysosome, melanosome, perinuclear region of cytoplasm, postsynaptic cytosol, presynaptic cytosol, synaptic vesicle	intermediate filament, microtubule			extracellular exosome	autophagosome, intermediate filament, lysosomal matrix, lysosomal membrane, lysosome, melanosome, microtubule, nucleolus, nucleus, spliceosomal complex, synaptic vesicle	lysosomal membrane, membrane raft, plasma membrane		nucleolus, nucleus, spliceosomal complex	lysosomal membrane	intermediate filament, lysosomal matrix, lysosomal membrane, microtubule, nucleolus, spliceosomal complex	plasma membrane				A1 adenosine receptor binding, ADP binding, ATP binding, RNA binding, enzyme binding, heat shock protein binding, misfolded protein binding, peptide binding, prostaglandin binding, protein binding involved in protein folding, receptor binding, transcription factor binding, unfolded protein binding	ATPase activity, coupled, clathrin-uncoating ATPase activity							A1 adenosine receptor binding, ADP binding, ATP binding, ATPase activity, coupled, RNA binding, clathrin-uncoating ATPase activity, enzyme binding, heat shock protein binding, misfolded protein binding, peptide binding, prostaglandin binding, protein binding involved in protein folding, receptor binding, transcription factor binding, unfolded protein binding
Heat shock-related 70 kDa protein 2 OS=Rattus norvegicus OX=10116 GN=Hspa2 PE=1 SV=2	HSP72_RAT		negative regulation of inclusion body assembly, positive regulation of ATPase activity, positive regulation of G2/M transition of mitotic cell cycle, positive regulation of calcium-transporting ATPase activity, positive regulation of protein phosphorylation		cellular response to heat, cellular response to unfolded protein, chaperone mediated protein folding requiring cofactor, male meiosis I, protein refolding, spermatid development, synaptonemal complex disassembly	multicellular organism development, spermatid development	vesicle-mediated transport			vesicle-mediated transport			spermatid development, spermatogenesis	multicellular organism development, spermatid development, spermatogenesis		male meiosis I, spermatid development, spermatogenesis	male meiosis I, spermatid development, spermatogenesis	cellular response to heat, cellular response to unfolded protein, response to cold, response to heat				cytoplasm, cytosol	meiotic spindle				male germ cell nucleus, meiotic spindle, nucleus, synaptonemal complex	CatSper complex, plasma membrane		male germ cell nucleus, nucleus, synaptonemal complex		meiotic spindle, synaptonemal complex	CatSper complex, plasma membrane				ATP binding, chaperone binding, disordered domain specific binding, enzyme binding, glycolipid binding, heat shock protein binding, misfolded protein binding, protein binding involved in protein folding, tau protein binding, unfolded protein binding	ATPase activity, ATPase activity, coupled							ATP binding, ATPase activity, ATPase activity, coupled, chaperone binding, disordered domain specific binding, enzyme binding, glycolipid binding, heat shock protein binding, misfolded protein binding, protein binding involved in protein folding, tau protein binding, unfolded protein binding
Uncharacterized protein OS=Rattus norvegicus OX=10116 PE=3 SV=1	A0A0G2JVI3_RAT
Prolargin OS=Rattus norvegicus OX=10116 GN=Prelp PE=2 SV=1	PRELP_RAT				cell aging	cell aging																				extracellular matrix											heparin binding								extracellular matrix structural constituent, heparin binding
Protein/nucleic acid deglycase DJ-1 OS=Rattus norvegicus OX=10116 GN=Park7 PE=1 SV=1	PARK7_RAT		glucose homeostasis, insulin secretion, negative regulation of NMDA glutamate receptor activity, negative regulation of TRAIL-activated apoptotic signaling pathway, negative regulation of cysteine-type endopeptidase activity involved in apoptotic signaling pathway, negative regulation of extrinsic apoptotic signaling pathway, negative regulation of neuron apoptotic process, negative regulation of…		DNA repair, autophagy, cellular response to glyoxal, cellular response to hydrogen peroxide, cellular response to lipopolysaccharide, glycolate biosynthetic process, hydrogen peroxide metabolic process, insulin secretion, mitochondrion organization, protein deglycation, glyoxal removal, protein deglycosylation	aging	insulin secretion			insulin secretion		DNA repair, autophagy, glycolate biosynthetic process, hydrogen peroxide metabolic process, protein deglycation, glyoxal removal, protein deglycosylation	cellular response to lipopolysaccharide, fertilization, maternal process involved in female pregnancy, single fertilization, spermatogenesis	maternal process involved in female pregnancy, spermatogenesis		fertilization, maternal process involved in female pregnancy, single fertilization, spermatogenesis	fertilization, maternal process involved in female pregnancy, single fertilization, spermatogenesis	DNA repair, cellular response to glyoxal, cellular response to hydrogen peroxide, cellular response to lipopolysaccharide, cellular response to oxidative stress, detoxification of copper ion, detoxification of mercury ion, inflammatory response, response to drug				cytosol, mitochondrion				extracellular exosome	PML body, mitochondrion, nucleus	membrane raft, plasma membrane	mitochondrion	PML body, nucleus		PML body	plasma membrane				androgen receptor binding, copper ion binding, cupric ion binding, cuprous ion binding, cytokine binding, mRNA binding, mercury ion binding, protein homodimerization activity, receptor binding, repressing transcription factor binding, scaffold protein binding, small protein activating enzyme binding, superoxide dismutase copper chaperone activity, ubiquitin-like protein conjugating enzyme binding	peptidase activity, protein deglycase activity					L-dopa decarboxylase activator activity, superoxide dismutase copper chaperone activity, tyrosine 3-monooxygenase activator activity	superoxide dismutase copper chaperone activity	L-dopa decarboxylase activator activity, androgen receptor binding, copper ion binding, cupric ion binding, cuprous ion binding, cytokine binding, mRNA binding, mercury ion binding, peptidase activity, protein deglycase activity, protein homodimerization activity, receptor binding, repressing transcription factor binding, scaffold protein binding, small protein activating enzyme binding, superoxi…
Talin 2 OS=Rattus norvegicus OX=10116 GN=Tln2 PE=1 SV=3	D4A3B0_RAT
Cluster of 40S ribosomal protein S12 OS=Rattus norvegicus OX=10116 GN=Rps12 PE=1 SV=1 (Q6PDW1_RAT)	Q6PDW1_RAT [3]
40S ribosomal protein S12 OS=Rattus norvegicus OX=10116 GN=LOC100360573 PE=3 SV=3	D3ZHB3_RAT
40S ribosomal protein S12 OS=Rattus norvegicus OX=10116 GN=Rps12 PE=1 SV=1	Q6PDW1_RAT
40S ribosomal protein S12 OS=Rattus norvegicus OX=10116 GN=RGD1561102 PE=3 SV=1	D3ZV36_RAT
Complement factor H OS=Rattus norvegicus OX=10116 GN=Cfh PE=1 SV=1	F1M983_RAT
Annexin A5 OS=Rattus norvegicus OX=10116 GN=Anxa5 PE=1 SV=3	ANXA5_RAT		blood coagulation, negative regulation of blood coagulation, negative regulation of prolactin secretion, negative regulation of sequestering of calcium ion, positive regulation of apoptotic process, regulation of flagellated sperm motility		cellular response to gonadotropin-releasing hormone, cellular response to lead ion, protein homooligomerization									blood coagulation				blood coagulation, cellular response to gonadotropin-releasing hormone, cellular response to lead ion, response to calcium ion, response to organic substance, response to thyroid hormone				Z disc, cytosol, endoplasmic reticulum, synaptic vesicle		endoplasmic reticulum		extracellular space	Z disc, endoplasmic reticulum, nucleus, synaptic vesicle	membrane, plasma membrane, sarcolemma		nucleus		Z disc	plasma membrane, sarcolemma				calcium ion binding, calcium-dependent phospholipid binding, heparin binding, peptide hormone binding, receptor tyrosine kinase binding	calcium-transporting ATPase activity							calcium ion binding, calcium-dependent phospholipid binding, calcium-transporting ATPase activity, heparin binding, peptide hormone binding, receptor tyrosine kinase binding
sp|Q9WVC7|AKAP6_RAT-DECOY A-kinase anchor protein 6 OS=Rattus norvegicus OX=10116...	AKAP6_RAT-DECOY
Superoxide dismutase [Cu-Zn] OS=Rattus norvegicus OX=10116 GN=Sod1 PE=1 SV=2	SODC_RAT		activation of MAPK activity, cellular iron ion homeostasis, muscle cell cellular homeostasis, myeloid cell homeostasis, negative regulation of apoptotic process, negative regulation of cholesterol biosynthetic process, negative regulation of inflammatory response, negative regulation of neuron apoptotic process, positive regulation of catalytic activity, positive regulation of cytokine production…		anterograde axonal transport, auditory receptor cell stereocilium organization, cell aging, cellular iron ion homeostasis, cellular response to ATP, cellular response to cadmium ion, cellular response to oxidative stress, cellular response to potassium ion, glutathione metabolic process, hydrogen peroxide biosynthetic process, muscle cell cellular homeostasis, neurofilament cytoskeleton organizat…	auditory receptor cell stereocilium organization, cell aging, embryo implantation, ovarian follicle development, peripheral nervous system myelin maintenance	anterograde axonal transport, retrograde axonal transport		myeloid cell homeostasis	anterograde axonal transport, retrograde axonal transport		glutathione metabolic process, hydrogen peroxide biosynthetic process, removal of superoxide radicals, superoxide anion generation, superoxide metabolic process	embryo implantation, spermatogenesis	auditory receptor cell stereocilium organization, embryo implantation, heart contraction, ovarian follicle development, peripheral nervous system myelin maintenance, regulation of blood pressure, relaxation of vascular smooth muscle, retina homeostasis, sensory perception of sound, spermatogenesis, transmission of nerve impulse		embryo implantation, ovarian follicle development, spermatogenesis	embryo implantation, ovarian follicle development, spermatogenesis	cellular response to ATP, cellular response to cadmium ion, cellular response to oxidative stress, cellular response to potassium ion, removal of superoxide radicals, response to amphetamine, response to antibiotic, response to antipsychotic drug, response to axon injury, response to carbon monoxide, response to copper ion, response to ethanol, response to heat, response to hydrogen peroxide, res…	ovarian follicle development			axon cytoplasm, cytosol, dendrite cytoplasm, dense core granule, lysosome, mitochondrial intermembrane space, mitochondrion, peroxisome				extracellular space	dense core granule, lysosome, mitochondrial intermembrane space, mitochondrion, nucleoplasm, nucleus, peroxisome	plasma membrane	mitochondrial intermembrane space	nucleoplasm		mitochondrial intermembrane space, nucleoplasm	plasma membrane		superoxide dismutase activity		Rac GTPase binding, chaperone binding, copper ion binding, enzyme binding, identical protein binding, protein phosphatase 2B binding, zinc ion binding	superoxide dismutase activity							Rac GTPase binding, chaperone binding, copper ion binding, enzyme binding, identical protein binding, protein phosphatase 2B binding, superoxide dismutase activity, zinc ion binding
Alpha-L-fucosidase OS=Rattus norvegicus OX=10116 GN=Fuca1 PE=1 SV=1	A0A0G2JSJ8_RAT (+1)
Argininosuccinate synthase OS=Rattus norvegicus OX=10116 GN=Ass1 PE=1 SV=1	ASSY_RAT		negative regulation of leukocyte cell-cell adhesion, positive regulation of nitric oxide biosynthetic process		arginine biosynthetic process, argininosuccinate metabolic process, aspartate metabolic process, cellular response to amine stimulus, cellular response to amino acid stimulus, cellular response to ammonium ion, cellular response to cAMP, cellular response to dexamethasone stimulus, cellular response to glucagon stimulus, cellular response to interferon-gamma, cellular response to laminar fluid sh…	aging, diaphragm development, kidney development, liver development, midgut development			cellular response to interferon-gamma			arginine biosynthetic process, argininosuccinate metabolic process, aspartate metabolic process, citrulline metabolic process, urea cycle	cellular response to lipopolysaccharide	diaphragm development, kidney development, liver development, midgut development				acute-phase response, cellular response to amine stimulus, cellular response to amino acid stimulus, cellular response to ammonium ion, cellular response to cAMP, cellular response to dexamethasone stimulus, cellular response to glucagon stimulus, cellular response to interferon-gamma, cellular response to laminar fluid shear stress, cellular response to lipopolysaccharide, cellular response to o…	circadian rhythm			cytoplasm, cytosol, endoplasmic reticulum, lysosome, mitochondrial outer membrane, mitochondrion		endoplasmic reticulum			endoplasmic reticulum, lysosome, mitochondrial outer membrane, mitochondrion, nucleus	mitochondrial outer membrane	mitochondrial outer membrane	nucleus	mitochondrial outer membrane	mitochondrial outer membrane					ATP binding, amino acid binding, identical protein binding, toxic substance binding	argininosuccinate synthase activity							ATP binding, amino acid binding, argininosuccinate synthase activity, identical protein binding, toxic substance binding
ABRA C-terminal-like OS=Rattus norvegicus OX=10116 GN=Abracl PE=1 SV=1	D3ZSL2_RAT
Perilipin OS=Rattus norvegicus OX=10116 GN=Plin3 PE=1 SV=1	M0RA08_RAT
AIP1, isoform CRA_a OS=Rattus norvegicus OX=10116 GN=Dpy30 PE=1 SV=1	G3V946_RAT
Ubiquitin-conjugating enzyme E2 D3 OS=Rattus norvegicus OX=10116 GN=Ube2d3 PE=3 SV=1	A0A0G2JV72_RAT (+4)
3'(2'),5'-bisphosphate nucleotidase 1 OS=Rattus norvegicus OX=10116 GN=Bpnt1 PE=1 SV=1	A0A0G2K0V3_RAT (+1)
Carbonic anhydrase 3 OS=Rattus norvegicus OX=10116 GN=Ca3 PE=1 SV=3	CAH3_RAT												response to bacterium					response to bacterium, response to ethanol, response to oxidative stress				cytosol															nickel cation binding, zinc ion binding	carbonate dehydratase activity, phosphatase activity							carbonate dehydratase activity, nickel cation binding, phosphatase activity, zinc ion binding
Uncharacterized protein OS=Rattus norvegicus OX=10116 PE=1 SV=3	F1M265_RAT
Cullin-associated NEDD8-dissociated protein 1 OS=Rattus norvegicus OX=10116 GN=Cand1 PE=1 SV=1	CAND1_RAT		negative regulation of catalytic activity, positive regulation of RNA polymerase II transcriptional preinitiation complex assembly, positive regulation of transcription, DNA-templated		SCF complex assembly, cell differentiation, protein ubiquitination	cell differentiation						protein ubiquitination									Golgi apparatus	Golgi apparatus, cytosol					Golgi apparatus, nucleoplasm, nucleus			nucleoplasm, nucleus		nucleoplasm					TBP-class protein binding								TBP-class protein binding
G3BP stress granule assembly factor 1 OS=Rattus norvegicus OX=10116 GN=G3bp1 PE=1 SV=1	D3ZYS7_RAT
60S ribosomal protein L13 OS=Rattus norvegicus OX=10116 GN=LOC100360491 PE=3 SV=1	D3ZRM9_RAT (+2)
Tryptophan--tRNA ligase, cytoplasmic OS=Rattus norvegicus OX=10116 GN=Wars PE=1 SV=1	F8WFH8_RAT (+1)
Collagen, type I, alpha 2 OS=Rattus norvegicus OX=10116 GN=NEWGENE_621351 PE=1 SV=1	A0A0G2K5E8_RAT (+3)
Splicing factor 3b, subunit 3 OS=Rattus norvegicus OX=10116 GN=Sf3b3 PE=1 SV=2	E9PT66_RAT
Ac2-125 OS=Rattus norvegicus OX=10116 GN=Fdps PE=1 SV=1	Q7TPK0_RAT
Ras-related protein Rab-11B OS=Rattus norvegicus OX=10116 GN=Rab11b PE=1 SV=1	A0A0G2JZR4_RAT (+2)
Peroxidasin OS=Rattus norvegicus OX=10116 GN=Pxdn PE=4 SV=1	A0A0G2JWB6_RAT (+1)
Ankyrin 2 OS=Rattus norvegicus OX=10116 GN=Ank2 PE=1 SV=1	A0A0G2K6R9_RAT (+4)
Laminin subunit beta-2 OS=Rattus norvegicus OX=10116 GN=Lamb2 PE=1 SV=1	LAMB2_RAT (+1)	substrate adhesion-dependent cell spreading			basement membrane assembly, cell migration, substrate adhesion-dependent cell spreading	animal organ morphogenesis, substrate adhesion-dependent cell spreading, tissue development				cell migration	cell migration			animal organ morphogenesis												laminin complex											integrin binding								extracellular matrix structural constituent, integrin binding
Histone-lysine N-methyltransferase OS=Rattus norvegicus OX=10116 GN=Kmt2b PE=1 SV=1	A0A0G2K1E3_RAT
Vacuolar protein sorting-associated protein 29 OS=Rattus norvegicus OX=10116 GN=Vps29 PE=1 SV=1	A0A0G2JTS3_RAT (+1)
Src substrate cortactin OS=Rattus norvegicus OX=10116 GN=Cttn PE=1 SV=1	A0A0G2JZ13_RAT (+2)
Coatomer subunit beta' OS=Rattus norvegicus OX=10116 GN=Copb2 PE=1 SV=3	COPB2_RAT						ER to Golgi vesicle-mediated transport, intra-Golgi vesicle-mediated transport, intracellular protein transport, retrograde vesicle-mediated transport, Golgi to ER			ER to Golgi vesicle-mediated transport, intra-Golgi vesicle-mediated transport, intracellular protein transport, retrograde vesicle-mediated transport, Golgi to ER											COPI vesicle coat, Golgi apparatus, Golgi membrane	COPI vesicle coat, Golgi apparatus, Golgi membrane, cytosol					COPI vesicle coat, Golgi apparatus, Golgi membrane	COPI vesicle coat, Golgi membrane			COPI vesicle coat, Golgi membrane	COPI vesicle coat, Golgi membrane					protein kinase C binding								protein kinase C binding, structural molecule activity
Creatine kinase U-type, mitochondrial OS=Rattus norvegicus OX=10116 GN=Ckmt1 PE=1 SV=1	Q5BJT9_RAT
Bcl2-associated athanogene 2 OS=Rattus norvegicus OX=10116 GN=Bag2 PE=4 SV=2	F1LQH9_RAT
Cluster of Serine/threonine-protein kinase PAK 2 OS=Rattus norvegicus OX=10116 GN=Pak2 PE=1 SV=1 (PAK2_RAT)	PAK2_RAT [2]		activation of protein kinase activity, hepatocyte growth factor receptor signaling pathway, negative regulation of cell growth involved in cardiac muscle cell development, negative regulation of cell proliferation involved in contact inhibition, negative regulation of cysteine-type endopeptidase activity involved in execution phase of apoptosis, positive regulation of JUN kinase activity, positiv…		actin cytoskeleton reorganization, apoptotic process, cellular response to DNA damage stimulus, cellular response to insulin stimulus, cellular response to transforming growth factor beta stimulus, chromatin remodeling, establishment of cell polarity, exocytosis, hepatocyte growth factor receptor signaling pathway, negative regulation of cell proliferation involved in contact inhibition, neuron p…	branching morphogenesis of an epithelial tube, cerebellum development, neuron projection morphogenesis, positive regulation of axon extension	exocytosis			exocytosis		protein autophosphorylation, signal transduction by protein phosphorylation		branching morphogenesis of an epithelial tube, cardiac muscle hypertrophy, cerebellum development, neuron projection morphogenesis, positive regulation of axon extension				cellular response to DNA damage stimulus, cellular response to insulin stimulus, cellular response to transforming growth factor beta stimulus, hepatocyte growth factor receptor signaling pathway, response to hypoxia, response to organic substance, signal transduction by protein phosphorylation, small GTPase mediated signal transduction, wound healing				Z disc, cytosol, perinuclear region of cytoplasm, secretory granule	actin filament				Z disc, actin filament, chromosome, nuclear membrane, nucleoplasm, nucleus, secretory granule	nuclear membrane, plasma membrane, ruffle membrane		nuclear membrane, nucleoplasm	nuclear membrane	Z disc, actin filament, nuclear membrane, nucleoplasm	ruffle membrane				ATP binding, Rac GTPase binding, collagen binding, protein kinase binding	MAP kinase kinase kinase activity							ATP binding, MAP kinase kinase kinase activity, Rac GTPase binding, collagen binding, protein kinase binding
Serine/threonine-protein kinase PAK 2 OS=Rattus norvegicus OX=10116 GN=Pak2 PE=1 SV=1	PAK2_RAT		activation of protein kinase activity, negative regulation of cysteine-type endopeptidase activity involved in execution phase of apoptosis, signal transduction by protein phosphorylation		cellular response to transforming growth factor beta stimulus, signal transduction by protein phosphorylation							signal transduction by protein phosphorylation		cardiac muscle hypertrophy				cellular response to transforming growth factor beta stimulus, signal transduction by protein phosphorylation				perinuclear region of cytoplasm, secretory granule					nucleus, secretory granule	membrane		nucleus							ATP binding	protein serine/threonine kinase activity							ATP binding, protein serine/threonine kinase activity
Serine/threonine-protein kinase PAK 1 OS=Rattus norvegicus OX=10116 GN=Pak1 PE=1 SV=3	PAK1_RAT		activation of protein kinase activity, hepatocyte growth factor receptor signaling pathway, intracellular signal transduction, negative regulation of cell growth involved in cardiac muscle cell development, negative regulation of cell proliferation involved in contact inhibition, positive regulation of JUN kinase activity, positive regulation of axon extension, positive regulation of cell migrati…		actin cytoskeleton reorganization, apoptotic process, cellular response to DNA damage stimulus, cellular response to insulin stimulus, chromatin remodeling, establishment of cell polarity, exocytosis, hepatocyte growth factor receptor signaling pathway, intracellular signal transduction, negative regulation of cell proliferation involved in contact inhibition, neuron projection morphogenesis, pos…	branching morphogenesis of an epithelial tube, cerebellum development, neuron projection morphogenesis, positive regulation of axon extension, regulation of axonogenesis	exocytosis			exocytosis		protein autophosphorylation, signal transduction by protein phosphorylation		branching morphogenesis of an epithelial tube, cerebellum development, neuron projection morphogenesis, positive regulation of axon extension, regulation of axonogenesis				cellular response to DNA damage stimulus, cellular response to insulin stimulus, hepatocyte growth factor receptor signaling pathway, intracellular signal transduction, response to hypoxia, response to organic substance, signal transduction by protein phosphorylation, small GTPase mediated signal transduction, wound healing				Z disc, cytoplasm, cytosol	actin filament				Z disc, actin filament, chromosome, nuclear membrane, nucleoplasm	nuclear membrane, plasma membrane, ruffle membrane		nuclear membrane, nucleoplasm	nuclear membrane	Z disc, actin filament, nuclear membrane, nucleoplasm	plasma membrane, ruffle membrane				ATP binding, Rac GTPase binding, collagen binding, protein kinase binding	MAP kinase kinase kinase activity, protein serine/threonine kinase activity							ATP binding, MAP kinase kinase kinase activity, Rac GTPase binding, collagen binding, protein kinase binding, protein serine/threonine kinase activity
Collagen type V alpha 2 chain OS=Rattus norvegicus OX=10116 GN=Col5a2 PE=1 SV=3	F1LQ00_RAT-DECOY
Medium-chain specific acyl-CoA dehydrogenase, mitochondrial OS=Rattus norvegicus OX=10116 GN=Acadm PE=1 SV=1	ACADM_RAT (+1)		regulation of gluconeogenesis		cardiac muscle cell differentiation, carnitine biosynthetic process, carnitine metabolic process, carnitine metabolic process, CoA-linked, fatty acid beta-oxidation using acyl-CoA dehydrogenase, glycogen biosynthetic process, medium-chain fatty acid catabolic process, medium-chain fatty acid metabolic process, organic acid metabolic process	cardiac muscle cell differentiation, heart development, liver development, post-embryonic development						carnitine biosynthetic process, carnitine metabolic process, carnitine metabolic process, CoA-linked, fatty acid beta-oxidation using acyl-CoA dehydrogenase, glycogen biosynthetic process, medium-chain fatty acid catabolic process, medium-chain fatty acid metabolic process, organic acid metabolic process, oxidation-reduction process		cardiac muscle cell differentiation, heart development, liver development, post-embryonic development				response to cold, response to copper ion, response to drug, response to glucocorticoid, response to nutrient, response to starvation				mitochondrial matrix, mitochondrial membrane, mitochondrion					mitochondrial matrix, mitochondrial membrane, mitochondrion	mitochondrial membrane	mitochondrial matrix, mitochondrial membrane		mitochondrial membrane	mitochondrial matrix, mitochondrial membrane					fatty-acyl-CoA binding, flavin adenine dinucleotide binding, identical protein binding	acyl-CoA dehydrogenase activity, isomerase activity, medium-chain-acyl-CoA dehydrogenase activity							acyl-CoA dehydrogenase activity, fatty-acyl-CoA binding, flavin adenine dinucleotide binding, identical protein binding, isomerase activity, medium-chain-acyl-CoA dehydrogenase activity
General vesicular transport factor p115 OS=Rattus norvegicus OX=10116 GN=Uso1 PE=1 SV=1	USO1_RAT		regulation of cellular response to insulin stimulus, small GTPase mediated signal transduction		Golgi organization, Golgi vesicle docking, membrane fusion, small GTPase mediated signal transduction, vesicle fusion with Golgi apparatus		ER to Golgi vesicle-mediated transport, Golgi vesicle docking, intra-Golgi vesicle-mediated transport, intracellular protein transport, transcytosis, vesicle fusion with Golgi apparatus			ER to Golgi vesicle-mediated transport, Golgi vesicle docking, intra-Golgi vesicle-mediated transport, intracellular protein transport, secretory granule localization, transcytosis, vesicle fusion with Golgi apparatus								small GTPase mediated signal transduction			Golgi membrane, Golgi stack	ER to Golgi transport vesicle membrane, Golgi membrane, Golgi stack, cytosol, endoplasmic reticulum, perinuclear region of cytoplasm		endoplasmic reticulum			ER to Golgi transport vesicle membrane, Golgi membrane, Golgi stack, endoplasmic reticulum, fibrillar center	ER to Golgi transport vesicle membrane, Golgi membrane		fibrillar center	ER to Golgi transport vesicle membrane, Golgi membrane	ER to Golgi transport vesicle membrane, Golgi membrane, Golgi stack, fibrillar center
E3 ubiquitin-protein ligase OS=Rattus norvegicus OX=10116 GN=Nedd4 PE=1 SV=1	A0A0G2K0B4_RAT (+2)
40S ribosomal protein S4 OS=Rattus norvegicus OX=10116 GN=Rps4x PE=3 SV=1	A0A0H2UHX3_RAT (+3)
Glutathione S-transferase alpha-3 OS=Rattus norvegicus OX=10116 GN=Gsta3 PE=1 SV=3	GSTA3_RAT				epithelial cell differentiation, glutathione derivative biosynthetic process, glutathione metabolic process, linoleic acid metabolic process, prostaglandin metabolic process, xenobiotic catabolic process	aging, epithelial cell differentiation						glutathione derivative biosynthetic process, glutathione metabolic process, linoleic acid metabolic process, prostaglandin metabolic process, xenobiotic catabolic process						response to drug, response to nutrient levels, xenobiotic catabolic process				cytosol					nuclear outer membrane, nucleus	nuclear outer membrane		nuclear outer membrane	nuclear outer membrane	nuclear outer membrane			glutathione peroxidase activity		drug binding, glutathione binding	glutathione peroxidase activity, glutathione transferase activity, steroid delta-isomerase activity							drug binding, glutathione binding, glutathione peroxidase activity, glutathione transferase activity, steroid delta-isomerase activity
Twinfilin-1 OS=Rattus norvegicus OX=10116 GN=Twf1 PE=1 SV=1	TWF1_RAT		barbed-end actin filament capping, positive regulation of cardiac muscle hypertrophy, positive regulation of neuron projection development, regulation of lamellipodium assembly, sequestering of actin monomers		actin filament depolymerization, barbed-end actin filament capping, positive regulation of neuron projection development, sequestering of actin monomers	positive regulation of neuron projection development				sequestering of actin monomers				positive regulation of neuron projection development								cytoplasm, myofibril, perinuclear region of cytoplasm	actin filament				actin filament, myofibril	ruffle membrane				actin filament	ruffle membrane				actin binding, actin filament binding, actin monomer binding, phosphatidylinositol-4,5-bisphosphate binding	protein tyrosine kinase activity							actin binding, actin filament binding, actin monomer binding, phosphatidylinositol-4,5-bisphosphate binding, protein tyrosine kinase activity
Cluster of Vigilin OS=Rattus norvegicus OX=10116 GN=Hdlbp PE=1 SV=1 (VIGLN_RAT)	VIGLN_RAT [2]						lipid transport			lipid transport		cholesterol metabolic process										cytoplasm				high-density lipoprotein particle	nucleus			nucleus							RNA binding								RNA binding
Hdlbp protein OS=Rattus norvegicus OX=10116 GN=Hdlbp PE=1 SV=1	Q6P513_RAT
Vigilin OS=Rattus norvegicus OX=10116 GN=Hdlbp PE=1 SV=1	VIGLN_RAT						lipid transport			lipid transport		cholesterol metabolic process										cytoplasm				high-density lipoprotein particle	nucleus			nucleus							RNA binding								RNA binding
RCG35999, isoform CRA_a OS=Rattus norvegicus OX=10116 GN=Smtn PE=1 SV=1	D4ABA5_RAT
tr|A0A0G2KAJ7|A0A0G2KAJ7_RAT-DECOY Collagen alpha-1(XII) chain OS=Rattus norvegicus...	A0A0G2KAJ7_RAT-DECOY
Uridine phosphorylase OS=Rattus norvegicus OX=10116 GN=Upp1 PE=1 SV=1	Q499V1_RAT
Asparaginyl-tRNA synthetase OS=Rattus norvegicus OX=10116 GN=Nars PE=1 SV=1	Q4KLM9_RAT
Splicing factor 3a, subunit 3 OS=Rattus norvegicus OX=10116 GN=Sf3a3 PE=1 SV=1	Q4KLI7_RAT
Alpha-aminoadipic semialdehyde dehydrogenase OS=Rattus norvegicus OX=10116 GN=Aldh7a1 PE=1 SV=2	AL7A1_RAT				glycine betaine biosynthetic process from choline							glycine betaine biosynthetic process from choline										cytosol, mitochondrion					mitochondrion, nucleus		mitochondrion	nucleus								L-aminoadipate-semialdehyde dehydrogenase activity, betaine-aldehyde dehydrogenase activity, glyceraldehyde-3-phosphate dehydrogenase (NAD+) (non-phosphorylating) activity							L-aminoadipate-semialdehyde dehydrogenase activity, betaine-aldehyde dehydrogenase activity, glyceraldehyde-3-phosphate dehydrogenase (NAD+) (non-phosphorylating) activity
Gamma-synuclein OS=Rattus norvegicus OX=10116 GN=Sncg PE=1 SV=1	A0A0G2K0T6_RAT
Collagen, type I, alpha 2 OS=Rattus norvegicus OX=10116 GN=NEWGENE_621351 PE=1 SV=1	A0A0G2K5E8_RAT-DECOY (+3)
tr|D3ZZT9|D3ZZT9_RAT-DECOY Collagen type XIV alpha 1 chain OS=Rattus norvegicus OX=10116...	D3ZZT9_RAT-DECOY
Collagen alpha-1(XXVII) chain OS=Rattus norvegicus OX=10116 GN=Col27a1 PE=2 SV=1	CORA1_RAT				extracellular matrix organization, growth plate cartilage chondrocyte development	growth plate cartilage chondrocyte development		growth plate cartilage chondrocyte development						growth plate cartilage chondrocyte development												extracellular matrix, extracellular space, fibrillar collagen trimer											metal ion binding								extracellular matrix structural constituent, metal ion binding
Trifunctional enzyme subunit alpha, mitochondrial OS=Rattus norvegicus OX=10116 GN=Hadha PE=1 SV=2	ECHA_RAT				cardiolipin acyl-chain remodeling, fatty acid beta-oxidation							cardiolipin acyl-chain remodeling, fatty acid beta-oxidation						response to drug, response to insulin				mitochondrial fatty acid beta-oxidation multienzyme complex, mitochondrial inner membrane, mitochondrial nucleoid, mitochondrion					mitochondrial fatty acid beta-oxidation multienzyme complex, mitochondrial inner membrane, mitochondrial nucleoid, mitochondrion	mitochondrial inner membrane	mitochondrial fatty acid beta-oxidation multienzyme complex, mitochondrial inner membrane, mitochondrial nucleoid		mitochondrial inner membrane	mitochondrial fatty acid beta-oxidation multienzyme complex, mitochondrial inner membrane, mitochondrial nucleoid					NAD binding, fatty-acyl-CoA binding, macromolecular complex binding	3-hydroxyacyl-CoA dehydrogenase activity, acetyl-CoA C-acyltransferase activity, enoyl-CoA hydratase activity, long-chain-3-hydroxyacyl-CoA dehydrogenase activity, long-chain-enoyl-CoA hydratase activity							3-hydroxyacyl-CoA dehydrogenase activity, NAD binding, acetyl-CoA C-acyltransferase activity, enoyl-CoA hydratase activity, fatty-acyl-CoA binding, long-chain-3-hydroxyacyl-CoA dehydrogenase activity, long-chain-enoyl-CoA hydratase activity, macromolecular complex binding
Cluster of Myosin-3 OS=Rattus norvegicus OX=10116 GN=Myh3 PE=1 SV=1 (G3V6D8_RAT)	G3V6D8_RAT [6]
Myosin-3 OS=Rattus norvegicus OX=10116 GN=Myh3 PE=1 SV=1	G3V6D8_RAT (+1)
Myosin-4 OS=Rattus norvegicus OX=10116 GN=Myh1 PE=1 SV=1	A0A0G2K0F5_RAT (+3)
Cluster of Complement C3 OS=Rattus norvegicus OX=10116 GN=C3 PE=1 SV=3 (CO3_RAT-DECOY)	CO3_RAT-DECOY [2]
Complement C3 OS=Rattus norvegicus OX=10116 GN=C3 PE=1 SV=3	CO3_RAT-DECOY
Complement C3 OS=Rattus norvegicus OX=10116 GN=C3 PE=1 SV=1	M0RBJ7_RAT-DECOY
Cluster of Uncharacterized protein OS=Rattus norvegicus OX=10116 PE=4 SV=2 (D3ZPL5_RAT)	D3ZPL5_RAT [7]
Uncharacterized protein OS=Rattus norvegicus OX=10116 PE=4 SV=1	D4A6B9_RAT
Uncharacterized protein OS=Rattus norvegicus OX=10116 PE=4 SV=2	D3ZPL5_RAT (+5)
Cluster of Sorbin and SH3 domain-containing protein 1 OS=Rattus norvegicus OX=10116 GN=Sorbs1 PE=1 SV=1 (F1M8Z8_RAT)	F1M8Z8_RAT [2]
Sorbin and SH3 domain-containing protein 1 OS=Rattus norvegicus OX=10116 GN=Sorbs1 PE=1 SV=1	F1M8Z8_RAT
Sorbin and SH3 domain-containing protein 1 OS=Rattus norvegicus OX=10116 GN=Sorbs1 PE=1 SV=1	F1M820_RAT
Collagen type VI alpha 5 chain OS=Rattus norvegicus OX=10116 GN=Col6a5 PE=1 SV=1	A0A0G2JTX7_RAT (+1)
ATP-citrate synthase OS=Rattus norvegicus OX=10116 GN=Acly PE=1 SV=1	A0A0G2K5E7_RAT (+3)
Eosinophil peroxidase OS=Rattus norvegicus OX=10116 GN=Epx PE=1 SV=1	D3ZSY4_RAT
sp|P36202|PDLI4_RAT-DECOY PDZ and LIM domain protein 4 OS=Rattus norvegicus OX=10116...	PDLI4_RAT-DECOY
Importin 5 OS=Rattus norvegicus OX=10116 GN=Ipo5 PE=1 SV=1	D4A781_RAT
BTB (POZ) domain containing 5 (Predicted) OS=Rattus norvegicus OX=10116 GN=Klhl28 PE=4 SV=1	D4AC05_RAT
DEAD (Asp-Glu-Ala-Asp) box polypeptide 17, isoform CRA_a OS=Rattus norvegicus OX=10116 GN=Ddx17 PE=1 SV=1	A0A096MIX2_RAT (+1)
Protein SEC13 homolog OS=Rattus norvegicus OX=10116 GN=Sec13 PE=1 SV=1	SEC13_RAT		positive regulation of TORC1 signaling		COPII-coated vesicle budding, protein localization to plasma membrane		COPII-coated vesicle budding, ER to Golgi vesicle-mediated transport, mRNA transport, protein exit from endoplasmic reticulum			COPII-coated vesicle budding, ER to Golgi vesicle-mediated transport, mRNA transport, protein exit from endoplasmic reticulum, protein localization to plasma membrane											Golgi membrane	COPII vesicle coat, Golgi membrane, cytosol, endoplasmic reticulum membrane, lysosomal membrane		endoplasmic reticulum membrane			COPII vesicle coat, Golgi membrane, endoplasmic reticulum membrane, lysosomal membrane, nuclear pore, nuclear pore outer ring	COPII vesicle coat, Golgi membrane, endoplasmic reticulum membrane, lysosomal membrane		nuclear pore, nuclear pore outer ring	COPII vesicle coat, Golgi membrane, lysosomal membrane	COPII vesicle coat, Golgi membrane, endoplasmic reticulum membrane, lysosomal membrane, nuclear pore, nuclear pore outer ring													structural molecule activity
Myeloid-derived growth factor OS=Rattus norvegicus OX=10116 GN=Mydgf PE=1 SV=2	M0R3V4_RAT
Glutamyl-prolyl-tRNA synthetase OS=Rattus norvegicus OX=10116 GN=Eprs PE=1 SV=1	A0A0G2JZI2_RAT (+1)
Nebulin OS=Rattus norvegicus OX=10116 GN=Neb PE=1 SV=1	A0A096MK15_RAT
Ubiquitin carboxyl-terminal hydrolase isozyme L1 OS=Rattus norvegicus OX=10116 GN=Uchl1 PE=1 SV=2	UCHL1_RAT		negative regulation of MAP kinase activity		axon target recognition, axonal transport of mitochondrion, muscle fiber development, protein deubiquitination, ubiquitin-dependent protein catabolic process	axon target recognition, muscle fiber development	axonal transport of mitochondrion			axonal transport of mitochondrion		protein deubiquitination, ubiquitin-dependent protein catabolic process		adult walking behavior, axon target recognition, neuromuscular process, sensory perception of pain				response to ischemia				axon cytoplasm, cytosol, endoplasmic reticulum membrane		endoplasmic reticulum membrane			endoplasmic reticulum membrane, nucleoplasm	endoplasmic reticulum membrane, plasma membrane		nucleoplasm		endoplasmic reticulum membrane, nucleoplasm	plasma membrane				alpha-2A adrenergic receptor binding, ubiquitin binding, ubiquitin protein ligase binding	cysteine-type endopeptidase activity, ligase activity, omega peptidase activity, thiol-dependent ubiquitin-specific protease activity							alpha-2A adrenergic receptor binding, cysteine-type endopeptidase activity, ligase activity, omega peptidase activity, thiol-dependent ubiquitin-specific protease activity, ubiquitin binding, ubiquitin protein ligase binding
Protein transport protein Sec31A OS=Rattus norvegicus OX=10116 GN=Sec31a PE=1 SV=1	A0A0G2K0X9_RAT (+2)
Ras-related protein Rab-2A OS=Rattus norvegicus OX=10116 GN=Rab2a PE=1 SV=3	F1LP82_RAT (+1)
Matrilysin OS=Rattus norvegicus OX=10116 GN=Mmp7 PE=2 SV=1	MMP7_RAT		regulation of cell proliferation		antibacterial peptide biosynthetic process, cellular response to mechanical stimulus, extracellular matrix organization	aging	antibacterial peptide secretion		antibacterial peptide biosynthetic process, antibacterial peptide secretion	antibacterial peptide secretion		antibacterial peptide biosynthetic process, collagen catabolic process, proteolysis	antibacterial peptide biosynthetic process, antibacterial peptide secretion, defense response to Gram-negative bacterium, defense response to Gram-positive bacterium, maternal process involved in female pregnancy	collagen catabolic process, estrous cycle, maternal process involved in female pregnancy		estrous cycle, maternal process involved in female pregnancy	estrous cycle, maternal process involved in female pregnancy	antibacterial peptide biosynthetic process, antibacterial peptide secretion, cellular response to mechanical stimulus, defense response to Gram-negative bacterium, defense response to Gram-positive bacterium, response to drug, response to nutrient levels	estrous cycle							extracellular matrix, extracellular space											heparin binding, zinc ion binding	metalloendopeptidase activity, metallopeptidase activity							heparin binding, metalloendopeptidase activity, metallopeptidase activity, zinc ion binding
Glycine--tRNA ligase OS=Rattus norvegicus OX=10116 GN=Gars PE=1 SV=1	G3V7G8_RAT (+1)
Cadherin-1 OS=Rattus norvegicus OX=10116 GN=Cdh1 PE=1 SV=1	CADH1_RAT	calcium-dependent cell-cell adhesion via plasma membrane cell adhesion molecules, cell-cell adhesion mediated by cadherin, homophilic cell adhesion via plasma membrane adhesion molecules	negative regulation of cell migration, negative regulation of cell-cell adhesion, positive regulation of protein import into nucleus, positive regulation of transcription, DNA-templated, regulation of gene expression, regulation of protein catabolic process at postsynapse, modulating synaptic transmission		adherens junction organization, cell morphogenesis, cell-cell junction assembly, cellular response to indole-3-methanol, cellular response to lithium ion, neuron projection development, protein localization to plasma membrane, synapse assembly	cell morphogenesis, neuron projection development, pituitary gland development, synapse assembly				protein localization to plasma membrane				neuron projection development, pituitary gland development, synapse assembly				cellular response to indole-3-methanol, cellular response to lithium ion, response to drug, response to toxic substance			trans-Golgi network	cortical actin cytoskeleton, endosome, perinuclear region of cytoplasm, trans-Golgi network	cortical actin cytoskeleton		endosome		cortical actin cytoskeleton, endosome, trans-Golgi network	catenin complex, cytoplasmic side of plasma membrane, flotillin complex, integral component of membrane, lateral plasma membrane, plasma membrane				cortical actin cytoskeleton, trans-Golgi network	catenin complex, cytoplasmic side of plasma membrane, flotillin complex, lateral plasma membrane, plasma membrane				GTPase activating protein binding, ankyrin binding, beta-catenin binding, cadherin binding, calcium ion binding, cytoskeletal protein binding, gamma-catenin binding, protein homodimerization activity								GTPase activating protein binding, ankyrin binding, beta-catenin binding, cadherin binding, calcium ion binding, cytoskeletal protein binding, gamma-catenin binding, protein homodimerization activity
Small nuclear ribonucleoprotein E OS=Rattus norvegicus OX=10116 GN=Snrpe PE=3 SV=1	D3ZSP1_RAT (+1)
Uncharacterized protein OS=Rattus norvegicus OX=10116 PE=4 SV=2	D3ZDP4_RAT
Eukaryotic translation initiation factor 2 subunit 3, X-linked OS=Rattus norvegicus OX=10116 GN=Eif2s3 PE=1 SV=2	IF2G_RAT (+1)		positive regulation of translational fidelity		formation of translation preinitiation complex							formation of translation preinitiation complex										cytosol, eukaryotic translation initiation factor 2 complex															GTP binding, translation initiation factor activity	GTPase activity							GTP binding, GTPase activity, translation initiation factor activity
Adenosine kinase OS=Rattus norvegicus OX=10116 GN=Adk PE=1 SV=1	A0A0G2JSL8_RAT (+1)
Collagen type XI alpha 2 chain OS=Rattus norvegicus OX=10116 GN=Col11a2 PE=4 SV=1	F6T0B3_RAT
Niban-like protein 1 OS=Rattus norvegicus OX=10116 GN=Fam129b PE=1 SV=1	NIBL1_RAT
Dynein, axonemal, heavy chain 8 OS=Rattus norvegicus OX=10116 GN=Dnah8 PE=1 SV=3	F1MAM6_RAT
Similar to RIKEN cDNA 5730469D23 (Predicted) OS=Rattus norvegicus OX=10116 GN=Uba6 PE=1 SV=1	D4A8H3_RAT
Aminopeptidase B OS=Rattus norvegicus OX=10116 GN=Rnpep PE=1 SV=2	AMPB_RAT (+1)		negative regulation of blood pressure			aging, retina development in camera-type eye						protein processing, proteolysis		negative regulation of blood pressure, retina development in camera-type eye							Golgi apparatus	Golgi apparatus, secretory granule				extracellular space	Golgi apparatus, secretory granule	external side of plasma membrane, plasma membrane					external side of plasma membrane				cobalt ion binding, copper ion binding, peptide binding, zinc ion binding	aminopeptidase activity, metalloaminopeptidase activity							aminopeptidase activity, cobalt ion binding, copper ion binding, metalloaminopeptidase activity, peptide binding, zinc ion binding
Eukaryotic translation initiation factor 3 subunit F OS=Rattus norvegicus OX=10116 GN=Eif3f PE=1 SV=3	D4AC36_RAT
Stabilin-2 OS=Rattus norvegicus OX=10116 GN=Stab2 PE=1 SV=3	F1LZZ6_RAT-DECOY
Leiomodin-1 OS=Rattus norvegicus OX=10116 GN=Lmod1 PE=1 SV=1	LMOD1_RAT		actin nucleation, pointed-end actin filament capping		actin nucleation, myofibril assembly, pointed-end actin filament capping, positive regulation of actin filament polymerization	myofibril assembly								muscle contraction								cytosol, myofibril, sarcomere, striated muscle thin filament	actin filament, striated muscle thin filament				actin filament, myofibril, sarcomere, striated muscle thin filament					actin filament, sarcomere, striated muscle thin filament					actin binding, tropomyosin binding								actin binding, tropomyosin binding
ATP synthase subunit O, mitochondrial OS=Rattus norvegicus OX=10116 GN=Atp5po PE=1 SV=1	ATPO_RAT				ATP metabolic process, ATP synthesis coupled proton transport, cellular response to cAMP, cellular response to cytokine stimulus		ATP synthesis coupled proton transport			ATP synthesis coupled proton transport		ATP metabolic process, ATP synthesis coupled proton transport						cellular response to cAMP, cellular response to cytokine stimulus				mitochondrial proton-transporting ATP synthase complex, mitochondrial proton-transporting ATP synthase complex, coupling factor F(o), mitochondrion					mitochondrial proton-transporting ATP synthase complex, mitochondrial proton-transporting ATP synthase complex, coupling factor F(o), mitochondrion	mitochondrial proton-transporting ATP synthase complex, mitochondrial proton-transporting ATP synthase complex, coupling factor F(o), plasma membrane	mitochondrial proton-transporting ATP synthase complex, mitochondrial proton-transporting ATP synthase complex, coupling factor F(o)		mitochondrial proton-transporting ATP synthase complex, mitochondrial proton-transporting ATP synthase complex, coupling factor F(o)	mitochondrial proton-transporting ATP synthase complex, mitochondrial proton-transporting ATP synthase complex, coupling factor F(o)	plasma membrane				estradiol binding, macromolecular complex binding	proton-transporting ATP synthase activity, rotational mechanism							estradiol binding, macromolecular complex binding, proton-transporting ATP synthase activity, rotational mechanism
RCG44919, isoform CRA_b OS=Rattus norvegicus OX=10116 GN=Tcp1 PE=1 SV=1	A0A096MJA0_RAT (+1)
Clathrin light chain B OS=Rattus norvegicus OX=10116 GN=Cltb PE=1 SV=1	CLCB_RAT		neurotransmitter secretion		clathrin coat assembly, neurotransmitter secretion, synaptic vesicle coating		clathrin-dependent endocytosis, intracellular protein transport, neurotransmitter secretion, neurotransmitter transport, synaptic vesicle coating			clathrin-dependent endocytosis, intracellular protein transport, neurotransmitter secretion, neurotransmitter transport, synaptic vesicle coating											clathrin coat of trans-Golgi network vesicle, trans-Golgi network	clathrin coat of coated pit, clathrin coat of trans-Golgi network vesicle, cytosol, postsynaptic endocytic zone cytoplasmic component, synaptic vesicle membrane, trans-Golgi network					clathrin coat of trans-Golgi network vesicle, synaptic vesicle membrane, trans-Golgi network	ciliary membrane, clathrin coat of coated pit, clathrin coat of trans-Golgi network vesicle, plasma membrane, presynaptic endocytic zone membrane, synaptic vesicle membrane			ciliary membrane, clathrin coat of trans-Golgi network vesicle, synaptic vesicle membrane	ciliary membrane, clathrin coat of trans-Golgi network vesicle, synaptic vesicle membrane, trans-Golgi network	ciliary membrane, clathrin coat of coated pit, plasma membrane, presynaptic endocytic zone membrane				clathrin heavy chain binding, peptide binding								clathrin heavy chain binding, neurotransmitter transporter activity, peptide binding, structural molecule activity
CLOCK-interacting pacemaker OS=Rattus norvegicus OX=10116 GN=Cipc PE=4 SV=2	D4A489_RAT
Anion exchange protein 2 OS=Rattus norvegicus OX=10116 GN=Slc4a2 PE=1 SV=1	B3A2_RAT		regulation of intracellular pH		regulation of intracellular pH	digestive tract development	bicarbonate transport, chloride transport			bicarbonate transport, chloride transport			spermatogenesis	digestive tract development, spermatogenesis		spermatogenesis	spermatogenesis											apical plasma membrane, basolateral plasma membrane, integral component of membrane					apical plasma membrane, basolateral plasma membrane				enzyme binding								anion:anion antiporter activity, chloride transmembrane transporter activity, enzyme binding, inorganic anion exchanger activity
Pyruvate dehydrogenase E1 component subunit beta OS=Rattus norvegicus OX=10116 GN=Pdhb PE=1 SV=1	A0A0G2KAM3_RAT (+1)
Coiled-coil domain-containing 40 OS=Rattus norvegicus OX=10116 GN=Ccdc40 PE=1 SV=1	A0A0G2JUV5_RAT
DENN domain-containing 4C OS=Rattus norvegicus OX=10116 GN=Dennd4c PE=1 SV=1	A0A0G2K089_RAT (+1)
Fatty acid-binding protein, adipocyte OS=Rattus norvegicus OX=10116 GN=Fabp4 PE=1 SV=1	A0A0G2K586_RAT (+2)
E3 ubiquitin-protein ligase UBR4 OS=Rattus norvegicus OX=10116 GN=Ubr4 PE=1 SV=1	A0A0G2JU89_RAT-DECOY (+2)
Resistin-like gamma OS=Rattus norvegicus OX=10116 GN=Retnlg PE=2 SV=1	RETNG_RAT																									extracellular space											cytokine activity, hormone activity								cytokine activity, hormone activity
Coatomer subunit alpha OS=Rattus norvegicus OX=10116 GN=Copa PE=1 SV=1	G3V6T1_RAT
Collagen alpha-1(XII) chain (Fragment) OS=Rattus norvegicus OX=10116 GN=Col12a1 PE=2 SV=1	COCA1_RAT	cell adhesion			growth plate cartilage chondrocyte morphogenesis	growth plate cartilage chondrocyte morphogenesis		growth plate cartilage chondrocyte morphogenesis						growth plate cartilage chondrocyte morphogenesis												collagen type XII trimer, extracellular matrix, extracellular space																			extracellular matrix structural constituent
Signal transducer and activator of transcription OS=Rattus norvegicus OX=10116 GN=Stat1 PE=1 SV=1	A0A0G2JX93_RAT (+1)
Protein CDV3 homolog OS=Rattus norvegicus OX=10116 GN=Cdv3 PE=1 SV=1	A0A0G2K0B0_RAT (+1)
sp|O88923|AGRL2_RAT-DECOY Adhesion G protein-coupled receptor L2 OS=Rattus norvegicus...	AGRL2_RAT-DECOY (+3)
Protein transport protein SEC23 OS=Rattus norvegicus OX=10116 GN=Sec23b PE=1 SV=2	D3ZCT7_RAT
Collagen alpha-1(IX) chain OS=Rattus norvegicus OX=10116 GN=Col9a1 PE=4 SV=3	F1LQ93_RAT-DECOY
tr|F1LYC7|F1LYC7_RAT-DECOY BCL6 co-repressor-like 1 OS=Rattus norvegicus OX=10116...	F1LYC7_RAT-DECOY
Spen family transcriptional repressor OS=Rattus norvegicus OX=10116 GN=Spen PE=1 SV=3	F1M455_RAT-DECOY (+1)
sp|Q63418|PCDH3_RAT-DECOY Protocadherin-3 OS=Rattus norvegicus OX=10116 GN=Pcdh3...	PCDH3_RAT-DECOY
Histone-binding protein RBBP7 OS=Rattus norvegicus OX=10116 GN=Rbbp7 PE=2 SV=1	RBBP7_RAT		negative regulation of cell growth, negative regulation of transcription from RNA polymerase II promoter		DNA replication, cellular heat acclimation, chromatin organization							DNA replication						cellular heat acclimation, response to steroid hormone				cytosol					ESC/E(Z) complex, NuRD complex, nucleus			ESC/E(Z) complex, NuRD complex, nucleus		ESC/E(Z) complex, NuRD complex					RNA binding								RNA binding
Cluster of tr|A0A0G2JU96|A0A0G2JU96_RAT-DECOY AHNAK nucleoprotein OS=Rattus norvegicus OX=10116... (A0A0G2JU96_RAT-DECOY)	A0A0G2JU96_RAT-DECOY [2]
tr|A0A0G2JU96|A0A0G2JU96_RAT-DECOY AHNAK nucleoprotein OS=Rattus norvegicus OX=10116...	A0A0G2JU96_RAT-DECOY
tr|A0A0G2JUA5|A0A0G2JUA5_RAT-DECOY AHNAK nucleoprotein OS=Rattus norvegicus OX=10116...	A0A0G2JUA5_RAT-DECOY
Nidogen-2 OS=Rattus norvegicus OX=10116 GN=Nid2 PE=1 SV=1	A0A0G2K3C8_RAT (+2)
ELAV-like protein 1 OS=Rattus norvegicus OX=10116 GN=Elavl1 PE=1 SV=1	ELAV1_RAT		3'-UTR-mediated mRNA stabilization, negative regulation of gene silencing by miRNA, regulation of stem cell population maintenance		protein homooligomerization																	cytoplasm, cytoplasmic stress granule, cytosol					cytoplasmic stress granule, nucleoplasm, nucleus			nucleoplasm		nucleoplasm					AU-rich element binding, double-stranded RNA binding, mRNA 3'-UTR AU-rich region binding, mRNA 3'-UTR binding, miRNA binding, protein homodimerization activity, protein kinase binding								AU-rich element binding, double-stranded RNA binding, mRNA 3'-UTR AU-rich region binding, mRNA 3'-UTR binding, miRNA binding, protein homodimerization activity, protein kinase binding
Long-chain specific acyl-CoA dehydrogenase, mitochondrial OS=Rattus norvegicus OX=10116 GN=Acadl PE=1 SV=1	ACADL_RAT				carnitine metabolic process, CoA-linked, fatty acid beta-oxidation using acyl-CoA dehydrogenase, long-chain fatty acid catabolic process, protein homotetramerization							carnitine metabolic process, CoA-linked, fatty acid beta-oxidation using acyl-CoA dehydrogenase, long-chain fatty acid catabolic process										mitochondrial matrix, mitochondrial membrane, mitochondrion					mitochondrial matrix, mitochondrial membrane, mitochondrion	mitochondrial membrane	mitochondrial matrix, mitochondrial membrane		mitochondrial membrane	mitochondrial matrix, mitochondrial membrane					fatty-acyl-CoA binding, flavin adenine dinucleotide binding	long-chain-acyl-CoA dehydrogenase activity, palmitoyl-CoA oxidase activity							fatty-acyl-CoA binding, flavin adenine dinucleotide binding, long-chain-acyl-CoA dehydrogenase activity, palmitoyl-CoA oxidase activity
Galectin-1 OS=Rattus norvegicus OX=10116 GN=Lgals1 PE=1 SV=2	LEG1_RAT		T cell costimulation, cellular response to glucose stimulus, negative regulation of cell-substrate adhesion, negative regulation of neuron projection development, positive regulation of erythrocyte aggregation, positive regulation of viral entry into host cell		apoptotic process, cellular response to glucose stimulus, cellular response to organic cyclic compound, myoblast differentiation, negative regulation of neuron projection development, plasma cell differentiation	myoblast differentiation, negative regulation of neuron projection development, plasma cell differentiation			T cell costimulation, plasma cell differentiation					negative regulation of neuron projection development, plasma cell differentiation				cellular response to glucose stimulus, cellular response to organic cyclic compound, plasma cell differentiation, response to axon injury, response to drug, response to isolation stress				cytoplasm, cytosol				extracellular space	nucleus			nucleus							carbohydrate binding, lactose binding, laminin binding, protein homodimerization activity								carbohydrate binding, lactose binding, laminin binding, protein homodimerization activity
Heterogeneous nuclear ribonucleoprotein A1 OS=Rattus norvegicus OX=10116 GN=Hnrnpa1 PE=1 SV=3	ROA1_RAT		positive regulation of action potential, positive regulation of gene expression, transformation of host cell by virus		RNA metabolic process, RNA splicing, cellular response to epidermal growth factor stimulus, cellular response to potassium ion, cellular response to sodium arsenite, cellular response to thapsigargin, cellular response to tunicamycin, mRNA processing, transformation of host cell by virus	lung development, male gonad development	mRNA transport, nuclear export, nuclear import			mRNA transport, nuclear export, nuclear import		RNA metabolic process, RNA splicing, mRNA processing	transformation of host cell by virus	lung development, male gonad development		male gonad development	male gonad development	cellular response to epidermal growth factor stimulus, cellular response to potassium ion, cellular response to sodium arsenite, cellular response to thapsigargin, cellular response to tunicamycin		transformation of host cell by virus		cytoplasm, cytosol					nucleoplasm, nucleoplasmic periphery of the nuclear pore complex, nucleus, spliceosomal complex			nucleoplasm, nucleoplasmic periphery of the nuclear pore complex, spliceosomal complex		nucleoplasm, nucleoplasmic periphery of the nuclear pore complex, spliceosomal complex					RNA strand annealing activity, annealing helicase activity, mRNA 3'-UTR binding, miRNA binding, sequence-specific mRNA binding, single-stranded DNA binding, single-stranded RNA binding, transcription factor binding	annealing helicase activity							RNA strand annealing activity, annealing helicase activity, mRNA 3'-UTR binding, miRNA binding, sequence-specific mRNA binding, single-stranded DNA binding, single-stranded RNA binding, transcription factor binding
Myosin heavy chain 14 OS=Rattus norvegicus OX=10116 GN=Myh14 PE=1 SV=1	F1LNF0_RAT
14-3-3 protein epsilon OS=Rattus norvegicus OX=10116 GN=Ywhae PE=1 SV=1	1433E_RAT		MAPK cascade, negative regulation of calcium ion export from cell, negative regulation of calcium ion transmembrane transporter activity, negative regulation of peptidyl-serine dephosphorylation, negative regulation of protein dephosphorylation, positive regulation of protein export from nucleus, regulation of cytosolic calcium ion concentration, regulation of membrane repolarization, regulation …		MAPK cascade, cellular response to heat, neuron migration, regulation of cytosolic calcium ion concentration, signal transduction	cerebral cortex development, hippocampus development, neuron migration	protein targeting			neuron migration, protein localization to nucleus, protein targeting	neuron migration	MAPK cascade		cerebral cortex development, hippocampus development, neuron migration				MAPK cascade, cellular response to heat				cytosol, melanosome	kinesin complex				kinesin complex, melanosome, nucleus	plasma membrane		nucleus		kinesin complex	plasma membrane				histone deacetylase binding, identical protein binding, ion channel binding, macromolecular complex binding, phosphoprotein binding, phosphoserine binding, protein domain specific binding, protein heterodimerization activity, protein phosphatase binding, scaffold protein binding, ubiquitin protein ligase binding						protein kinase C inhibitor activity		calcium channel regulator activity, histone deacetylase binding, identical protein binding, ion channel binding, macromolecular complex binding, phosphoprotein binding, phosphoserine binding, potassium channel regulator activity, protein domain specific binding, protein heterodimerization activity, protein kinase C inhibitor activity, protein phosphatase binding, scaffold protein binding, ubiquit…
Calreticulin OS=Rattus norvegicus OX=10116 GN=Calr PE=1 SV=1	CALR_RAT		endoplasmic reticulum unfolded protein response, negative regulation of cell cycle arrest, negative regulation of intracellular steroid hormone receptor signaling pathway, negative regulation of neuron differentiation, negative regulation of retinoic acid receptor signaling pathway, negative regulation of transcription from RNA polymerase II promoter, negative regulation of translation, negative …		cardiac muscle cell differentiation, cellular response to lithium ion, cellular response to organic substance, cellular senescence, cortical actin cytoskeleton organization, endoplasmic reticulum unfolded protein response, negative regulation of neuron differentiation, peptide antigen assembly with MHC class I protein complex, protein folding	cardiac muscle cell differentiation, cellular senescence, negative regulation of neuron differentiation	protein export from nucleus		peptide antigen assembly with MHC class I protein complex	protein export from nucleus, protein localization to nucleus			spermatogenesis	cardiac muscle cell differentiation, negative regulation of neuron differentiation, spermatogenesis		spermatogenesis	spermatogenesis	cellular response to lithium ion, cellular response to organic substance, cellular senescence, endoplasmic reticulum unfolded protein response, response to drug, response to estradiol, response to testosterone			Golgi apparatus	Golgi apparatus, MHC class I peptide loading complex, acrosomal vesicle, cytoplasm, cytosol, endoplasmic reticulum membrane, endoplasmic reticulum quality control compartment, perinuclear region of cytoplasm, sarcoplasmic reticulum, sarcoplasmic reticulum lumen, smooth endoplasmic reticulum		MHC class I peptide loading complex, endoplasmic reticulum membrane, endoplasmic reticulum quality control compartment, sarcoplasmic reticulum, sarcoplasmic reticulum lumen, smooth endoplasmic reticulum		extracellular space	Golgi apparatus, MHC class I peptide loading complex, acrosomal vesicle, endoplasmic reticulum membrane, endoplasmic reticulum quality control compartment, nuclear envelope, nucleus, sarcoplasmic reticulum, sarcoplasmic reticulum lumen, smooth endoplasmic reticulum	MHC class I peptide loading complex, endoplasmic reticulum membrane, external side of plasma membrane		nuclear envelope		MHC class I peptide loading complex, endoplasmic reticulum membrane, endoplasmic reticulum quality control compartment, nuclear envelope, sarcoplasmic reticulum lumen	external side of plasma membrane				androgen receptor binding, calcium ion binding, carbohydrate binding, hormone binding, integrin binding, iron ion binding, mRNA binding, peptide binding, ubiquitin protein ligase binding, unfolded protein binding								androgen receptor binding, calcium ion binding, carbohydrate binding, hormone binding, integrin binding, iron ion binding, mRNA binding, peptide binding, ubiquitin protein ligase binding, unfolded protein binding
Cluster of Heat shock 70 kDa protein 1B OS=Rattus norvegicus OX=10116 GN=Hspa1b PE=2 SV=1 (HS71B_RAT)	HS71B_RAT [2]		mRNA catabolic process, negative regulation of cell death, negative regulation of cell growth, negative regulation of cell proliferation, negative regulation of cysteine-type endopeptidase activity involved in apoptotic process, negative regulation of endoplasmic reticulum stress-induced intrinsic apoptotic signaling pathway, negative regulation of extrinsic apoptotic signaling pathway in absence…		ATP metabolic process, binding of sperm to zona pellucida, cellular heat acclimation, cellular response to unfolded protein, chaperone mediated protein folding requiring cofactor, chaperone-mediated protein complex assembly, mRNA catabolic process, negative regulation of mitochondrial outer membrane permeabilization involved in apoptotic signaling pathway, negative regulation of transcription fro…		negative regulation of mitochondrial outer membrane permeabilization involved in apoptotic signaling pathway, vesicle-mediated transport			negative regulation of mitochondrial outer membrane permeabilization involved in apoptotic signaling pathway, vesicle-mediated transport		ATP metabolic process, mRNA catabolic process	binding of sperm to zona pellucida	negative regulation of vasoconstriction		binding of sperm to zona pellucida	binding of sperm to zona pellucida	cellular heat acclimation, cellular response to heat, cellular response to unfolded protein, defense response, negative regulation of transcription from RNA polymerase II promoter in response to stress, response to heat, response to unfolded protein				centriole, cytosol, mitochondrial matrix, mitochondrion, perinuclear region of cytoplasm	centriole, centrosome				COP9 signalosome, centriole, centrosome, mitochondrial matrix, mitochondrion, nuclear speck, nucleus	apical plasma membrane, basolateral plasma membrane, membrane raft, plasma membrane	mitochondrial matrix, mitochondrion	COP9 signalosome, nuclear speck		COP9 signalosome, centriole, centrosome, mitochondrial matrix, nuclear speck	apical plasma membrane, basolateral plasma membrane, plasma membrane				ATP binding, C3HC4-type RING finger domain binding, G-protein coupled receptor binding, NF-kappaB binding, denatured protein binding, disordered domain specific binding, heat shock protein binding, histone deacetylase binding, misfolded protein binding, protease binding, protein N-terminus binding, protein binding involved in protein folding, receptor binding, ubiquitin protein ligase binding, un…	ATPase activity, ATPase activity, coupled							ATP binding, ATPase activity, ATPase activity, coupled, C3HC4-type RING finger domain binding, G-protein coupled receptor binding, NF-kappaB binding, denatured protein binding, disordered domain specific binding, heat shock protein binding, histone deacetylase binding, misfolded protein binding, protease binding, protein N-terminus binding, protein binding involved in protein folding, receptor bi…
Heat shock 70 kDa protein 1-like OS=Rattus norvegicus OX=10116 GN=Hspa1l PE=2 SV=2	HS71L_RAT		positive regulation of protein targeting to mitochondrion		binding of sperm to zona pellucida, cellular response to heat, cellular response to unfolded protein, chaperone mediated protein folding requiring cofactor, protein refolding		vesicle-mediated transport			vesicle-mediated transport			binding of sperm to zona pellucida			binding of sperm to zona pellucida	binding of sperm to zona pellucida	cellular response to heat, cellular response to unfolded protein				cytosol, mitochondrial matrix, mitochondrion					COP9 signalosome, mitochondrial matrix, mitochondrion, nucleus	plasma membrane	mitochondrial matrix	COP9 signalosome		COP9 signalosome, mitochondrial matrix	plasma membrane				ATP binding, heat shock protein binding, misfolded protein binding, protein binding involved in protein folding, ubiquitin protein ligase binding, unfolded protein binding	ATPase activity, coupled							ATP binding, ATPase activity, coupled, heat shock protein binding, misfolded protein binding, protein binding involved in protein folding, ubiquitin protein ligase binding, unfolded protein binding
Heat shock 70 kDa protein 1B OS=Rattus norvegicus OX=10116 GN=Hspa1b PE=2 SV=1	HS71B_RAT		mRNA catabolic process, negative regulation of cell death, negative regulation of cell growth, negative regulation of cell proliferation, negative regulation of cysteine-type endopeptidase activity involved in apoptotic process, negative regulation of endoplasmic reticulum stress-induced intrinsic apoptotic signaling pathway, negative regulation of extrinsic apoptotic signaling pathway in absence…		ATP metabolic process, binding of sperm to zona pellucida, cellular heat acclimation, cellular response to unfolded protein, chaperone mediated protein folding requiring cofactor, chaperone-mediated protein complex assembly, mRNA catabolic process, negative regulation of mitochondrial outer membrane permeabilization involved in apoptotic signaling pathway, negative regulation of transcription fro…		negative regulation of mitochondrial outer membrane permeabilization involved in apoptotic signaling pathway, vesicle-mediated transport			negative regulation of mitochondrial outer membrane permeabilization involved in apoptotic signaling pathway, vesicle-mediated transport		ATP metabolic process, mRNA catabolic process	binding of sperm to zona pellucida	negative regulation of vasoconstriction		binding of sperm to zona pellucida	binding of sperm to zona pellucida	cellular heat acclimation, cellular response to heat, cellular response to unfolded protein, defense response, negative regulation of transcription from RNA polymerase II promoter in response to stress, response to heat, response to unfolded protein				centriole, cytosol, mitochondrion, perinuclear region of cytoplasm	centriole, centrosome				centriole, centrosome, mitochondrion, nuclear speck, nucleus	apical plasma membrane, basolateral plasma membrane, membrane raft, plasma membrane	mitochondrion	nuclear speck		centriole, centrosome, nuclear speck	apical plasma membrane, basolateral plasma membrane, plasma membrane				ATP binding, C3HC4-type RING finger domain binding, G-protein coupled receptor binding, NF-kappaB binding, denatured protein binding, disordered domain specific binding, heat shock protein binding, histone deacetylase binding, misfolded protein binding, protease binding, protein N-terminus binding, protein binding involved in protein folding, receptor binding, ubiquitin protein ligase binding, un…	ATPase activity, ATPase activity, coupled							ATP binding, ATPase activity, ATPase activity, coupled, C3HC4-type RING finger domain binding, G-protein coupled receptor binding, NF-kappaB binding, denatured protein binding, disordered domain specific binding, heat shock protein binding, histone deacetylase binding, misfolded protein binding, protease binding, protein N-terminus binding, protein binding involved in protein folding, receptor bi…
CArG-binding factor A OS=Rattus norvegicus OX=10116 GN=Hnrnpab PE=1 SV=1	Q9QX80_RAT (+1)
Immunoglobulin heavy constant mu OS=Rattus norvegicus OX=10116 GN=Ighm PE=1 SV=1	A0A0G2JVP4_RAT (+2)
Cluster of Ceruloplasmin OS=Rattus norvegicus OX=10116 GN=Cp PE=1 SV=1 (A0A0G2K9I6_RAT)	A0A0G2K9I6_RAT [3]		cellular iron ion homeostasis, iron ion homeostasis		cellular iron ion homeostasis	aging, liver development, lung development	iron ion transport, plasma membrane copper ion transport			iron ion transport, plasma membrane copper ion transport				liver development, lung development				response to copper ion, response to nutrient								extracellular space		anchored component of plasma membrane, plasma membrane					anchored component of plasma membrane, plasma membrane				copper ion binding	ferroxidase activity							copper ion binding, ferroxidase activity
Ceruloplasmin OS=Rattus norvegicus OX=10116 GN=Cp PE=1 SV=1	A0A0G2K9I6_RAT (+1)
Ceruloplasmin OS=Rattus norvegicus OX=10116 GN=Cp PE=1 SV=3	CERU_RAT		cellular iron ion homeostasis, iron ion homeostasis		cellular iron ion homeostasis	aging, liver development, lung development	iron ion transport, plasma membrane copper ion transport			iron ion transport, plasma membrane copper ion transport				liver development, lung development				response to copper ion, response to nutrient								extracellular space		anchored component of plasma membrane, plasma membrane					anchored component of plasma membrane, plasma membrane				copper ion binding	ferroxidase activity							copper ion binding, ferroxidase activity
Fetuin-B OS=Rattus norvegicus OX=10116 GN=Fetub PE=2 SV=2	FETUB_RAT (+1)		negative regulation of endopeptidase activity		binding of sperm to zona pellucida								binding of sperm to zona pellucida			binding of sperm to zona pellucida, single fertilization	binding of sperm to zona pellucida, single fertilization									extracellular space																	cysteine-type endopeptidase inhibitor activity, metalloendopeptidase inhibitor activity		cysteine-type endopeptidase inhibitor activity, metalloendopeptidase inhibitor activity
Histone H2B OS=Rattus norvegicus OX=10116 GN=LOC102549061 PE=3 SV=1	A0A0G2JXE0_RAT
PDZ and LIM domain protein 4 OS=Rattus norvegicus OX=10116 GN=Pdlim4 PE=1 SV=1	M0R4H5_RAT
Cluster of Heterogeneous nuclear ribonucleoprotein A3 OS=Rattus norvegicus OX=10116 GN=Hnrnpa3 PE=1 SV=1 (ROA3_RAT)	ROA3_RAT [2]				RNA splicing, mRNA processing		mRNA transport			mRNA transport		RNA splicing, mRNA processing										cytoplasm					catalytic step 2 spliceosome, nucleoplasm, nucleus, ribonucleoprotein granule			catalytic step 2 spliceosome, nucleoplasm		catalytic step 2 spliceosome, nucleoplasm					mRNA binding								RNA transmembrane transporter activity, mRNA binding
Uncharacterized protein OS=Rattus norvegicus OX=10116 PE=1 SV=2	E9PSU5_RAT
Heterogeneous nuclear ribonucleoprotein A3 OS=Rattus norvegicus OX=10116 GN=Hnrnpa3 PE=1 SV=1	ROA3_RAT				RNA splicing, mRNA processing		mRNA transport			mRNA transport		RNA splicing, mRNA processing										cytoplasm					catalytic step 2 spliceosome, nucleoplasm, nucleus, ribonucleoprotein granule			catalytic step 2 spliceosome, nucleoplasm		catalytic step 2 spliceosome, nucleoplasm					mRNA binding								RNA transmembrane transporter activity, mRNA binding
Cluster of Nucleophosmin OS=Rattus norvegicus OX=10116 GN=Npm1 PE=1 SV=1 (NPM_RAT)	NPM_RAT [2]		cell volume homeostasis, negative regulation of apoptotic process, negative regulation of cardiac muscle cell apoptotic process, negative regulation of cell proliferation, negative regulation of centrosome duplication, negative regulation of epithelial cell proliferation, negative regulation of mRNA splicing, via spliceosome, negative regulation of neuron apoptotic process, negative regulation of…		DNA repair, cell aging, cell volume homeostasis, cellular response to hypoxia, cellular response to testosterone stimulus, centrosome cycle, chromatin remodeling, cleavage in ITS2 between 5.8S rRNA and LSU-rRNA of tricistronic rRNA transcript (SSU-rRNA, 5.8S rRNA, LSU-rRNA), nucleosome assembly, protein homooligomerization, rRNA transcription, regulation of eIF2 alpha phosphorylation by dsRNA, re…	cell aging, liver regeneration	nucleocytoplasmic transport, rRNA export from nucleus, ribosomal large subunit export from nucleus, ribosomal small subunit export from nucleus			nucleocytoplasmic transport, protein localization, rRNA export from nucleus, ribosomal large subunit export from nucleus, ribosomal small subunit export from nucleus		DNA repair, cleavage in ITS2 between 5.8S rRNA and LSU-rRNA of tricistronic rRNA transcript (SSU-rRNA, 5.8S rRNA, LSU-rRNA), rRNA transcription		cardiac muscle hypertrophy, liver regeneration				DNA repair, cellular response to hypoxia, cellular response to testosterone stimulus, regulation of eIF2 alpha phosphorylation by dsRNA, regulation of mRNA stability involved in cellular response to UV				cytoplasm, cytosol, large ribosomal subunit, small ribosomal subunit	centrosome, spindle pole centrosome				centrosome, granular component, large ribosomal subunit, nuclear matrix, nuclear speck, nucleolus, nucleoplasm, nucleus, small ribosomal subunit, spindle pole centrosome			granular component, nuclear matrix, nuclear speck, nucleolus, nucleoplasm		centrosome, granular component, large ribosomal subunit, nuclear matrix, nuclear speck, nucleolus, nucleoplasm, small ribosomal subunit, spindle pole centrosome		large ribosomal subunit, small ribosomal subunit			ATP binding, DNA binding, NF-kappaB binding, Tat protein binding, activating transcription factor binding, chromatin binding, core promoter binding, histone binding, p53 binding, phosphatidylinositol-3,4,5-trisphosphate binding, protein N-terminus binding, protein heterodimerization activity, protein homodimerization activity, protein kinase B binding, protein kinase binding, rRNA binding, riboso…						protein kinase inhibitor activity		ATP binding, DNA binding, NF-kappaB binding, Tat protein binding, activating transcription factor binding, chromatin binding, core promoter binding, histone binding, p53 binding, phosphatidylinositol-3,4,5-trisphosphate binding, protein N-terminus binding, protein heterodimerization activity, protein homodimerization activity, protein kinase B binding, protein kinase binding, protein kinase inhib…
Nucleophosmin OS=Rattus norvegicus OX=10116 GN=Npm1 PE=1 SV=1	NPM_RAT		cell volume homeostasis, negative regulation of apoptotic process, negative regulation of cardiac muscle cell apoptotic process, negative regulation of cell proliferation, negative regulation of centrosome duplication, negative regulation of epithelial cell proliferation, negative regulation of mRNA splicing, via spliceosome, negative regulation of neuron apoptotic process, negative regulation of…		DNA repair, cell aging, cell volume homeostasis, cellular response to hypoxia, cellular response to testosterone stimulus, centrosome cycle, chromatin remodeling, cleavage in ITS2 between 5.8S rRNA and LSU-rRNA of tricistronic rRNA transcript (SSU-rRNA, 5.8S rRNA, LSU-rRNA), nucleosome assembly, protein homooligomerization, rRNA transcription, regulation of eIF2 alpha phosphorylation by dsRNA, re…	cell aging, liver regeneration	nucleocytoplasmic transport, rRNA export from nucleus, ribosomal large subunit export from nucleus, ribosomal small subunit export from nucleus			nucleocytoplasmic transport, protein localization, rRNA export from nucleus, ribosomal large subunit export from nucleus, ribosomal small subunit export from nucleus		DNA repair, cleavage in ITS2 between 5.8S rRNA and LSU-rRNA of tricistronic rRNA transcript (SSU-rRNA, 5.8S rRNA, LSU-rRNA), rRNA transcription		cardiac muscle hypertrophy, liver regeneration				DNA repair, cellular response to hypoxia, cellular response to testosterone stimulus, regulation of eIF2 alpha phosphorylation by dsRNA, regulation of mRNA stability involved in cellular response to UV				cytoplasm, cytosol, large ribosomal subunit, small ribosomal subunit	centrosome, spindle pole centrosome				centrosome, granular component, large ribosomal subunit, nuclear matrix, nuclear speck, nucleolus, nucleoplasm, nucleus, small ribosomal subunit, spindle pole centrosome			granular component, nuclear matrix, nuclear speck, nucleolus, nucleoplasm		centrosome, granular component, large ribosomal subunit, nuclear matrix, nuclear speck, nucleolus, nucleoplasm, small ribosomal subunit, spindle pole centrosome		large ribosomal subunit, small ribosomal subunit			ATP binding, DNA binding, NF-kappaB binding, Tat protein binding, activating transcription factor binding, chromatin binding, core promoter binding, histone binding, p53 binding, phosphatidylinositol-3,4,5-trisphosphate binding, protein N-terminus binding, protein heterodimerization activity, protein homodimerization activity, protein kinase B binding, protein kinase binding, rRNA binding, riboso…						protein kinase inhibitor activity		ATP binding, DNA binding, NF-kappaB binding, Tat protein binding, activating transcription factor binding, chromatin binding, core promoter binding, histone binding, p53 binding, phosphatidylinositol-3,4,5-trisphosphate binding, protein N-terminus binding, protein heterodimerization activity, protein homodimerization activity, protein kinase B binding, protein kinase binding, protein kinase inhib…
Uncharacterized protein OS=Rattus norvegicus OX=10116 PE=4 SV=2	D3ZXI2_RAT
Cluster of Protein SET OS=Rattus norvegicus OX=10116 GN=Set PE=1 SV=1 (A0A0G2JSU3_RAT)	A0A0G2JSU3_RAT [3]
Protein SET OS=Rattus norvegicus OX=10116 GN=Set PE=1 SV=1	A0A0G2JSU3_RAT (+1)
Uncharacterized protein OS=Rattus norvegicus OX=10116 PE=3 SV=1	A0A0G2K5L9_RAT
RCG61762, isoform CRA_d OS=Rattus norvegicus OX=10116 GN=Srsf7 PE=1 SV=1	D4A720_RAT
Dihydropyrimidinase-related protein 3 OS=Rattus norvegicus OX=10116 GN=Dpysl3 PE=1 SV=2	DPYL3_RAT		negative regulation of cell migration, negative regulation of neuron projection development, positive regulation of filopodium assembly, positive regulation of neuron projection development		actin crosslink formation, actin filament bundle assembly, cellular response to cytokine stimulus, negative regulation of neuron projection development, neuron development, positive regulation of neuron projection development, protein homooligomerization	negative regulation of neuron projection development, neuron development, positive regulation of neuron projection development								negative regulation of neuron projection development, neuron development, positive regulation of neuron projection development				cellular response to cytokine stimulus, response to axon injury				cytosol	filamentous actin			extracellular space	filamentous actin					filamentous actin					SH3 domain binding, chondroitin sulfate binding, filamin binding	hydrolase activity, acting on carbon-nitrogen (but not peptide) bonds, in cyclic amides							SH3 domain binding, chondroitin sulfate binding, filamin binding, hydrolase activity, acting on carbon-nitrogen (but not peptide) bonds, in cyclic amides
Cell surface glycoprotein MUC18 OS=Rattus norvegicus OX=10116 GN=Mcam PE=1 SV=2	MUC18_RAT	cell adhesion	positive regulation of cell migration			vascular wound healing								glomerular filtration, vascular wound healing				vascular wound healing								extracellular space	nucleus	external side of plasma membrane, integral component of membrane		nucleus			external side of plasma membrane
RCG31390 OS=Rattus norvegicus OX=10116 GN=Sfn PE=3 SV=1	G3V9A3_RAT
Gamma-enolase OS=Rattus norvegicus OX=10116 GN=Eno2 PE=1 SV=2	ENOG_RAT		negative regulation of neuron death, regulation of neuron death		canonical glycolysis, glycolytic process, protein heterotetramerization							canonical glycolysis, gluconeogenesis, glycolytic process		multicellular organismal reproductive process		multicellular organismal reproductive process	multicellular organismal reproductive process	response to drug, response to estradiol				cell cortex region, phosphopyruvate hydratase complex						membrane raft, synaptic membrane					synaptic membrane				enzyme binding, magnesium ion binding, protein heterodimerization activity, protein homodimerization activity	phosphopyruvate hydratase activity							enzyme binding, magnesium ion binding, phosphopyruvate hydratase activity, protein heterodimerization activity, protein homodimerization activity
Neuron navigator 2 OS=Rattus norvegicus OX=10116 GN=Nav2 PE=1 SV=2	F1LR12_RAT
Cluster of Histone cluster 1 H1 family member c OS=Rattus norvegicus OX=10116 GN=Hist1h1c PE=1 SV=1 (A0A0G2K654_RAT)	A0A0G2K654_RAT [2]		negative regulation of DNA recombination, negative regulation of chromatin silencing, negative regulation of transcription from RNA polymerase II promoter, regulation of transcription, DNA-templated		chromosome condensation, histone H3-K27 trimethylation, histone H3-K4 trimethylation, nucleosome assembly, nucleosome positioning							histone H3-K27 trimethylation, histone H3-K4 trimethylation															nuclear chromatin, nuclear euchromatin, nuclear heterochromatin, nuclear nucleosome, nucleus			nuclear chromatin, nuclear euchromatin, nuclear heterochromatin, nuclear nucleosome		nuclear chromatin, nuclear euchromatin, nuclear heterochromatin, nuclear nucleosome					ADP binding, AMP binding, ATP binding, GTP binding, calcium ion binding, dATP binding, double-stranded DNA binding, nucleosomal DNA binding, nucleotide binding								ADP binding, AMP binding, ATP binding, GTP binding, calcium ion binding, dATP binding, double-stranded DNA binding, nucleosomal DNA binding, nucleotide binding
Histone cluster 1 H1 family member c OS=Rattus norvegicus OX=10116 GN=Hist1h1c PE=1 SV=1	A0A0G2K654_RAT
Histone H1.4 OS=Rattus norvegicus OX=10116 GN=Hist1h1e PE=1 SV=3	H14_RAT		negative regulation of DNA recombination, negative regulation of chromatin silencing, negative regulation of transcription from RNA polymerase II promoter, regulation of transcription, DNA-templated		chromosome condensation, histone H3-K27 trimethylation, histone H3-K4 trimethylation, nucleosome assembly, nucleosome positioning							histone H3-K27 trimethylation, histone H3-K4 trimethylation															nuclear chromatin, nuclear euchromatin, nuclear heterochromatin, nuclear nucleosome, nucleus			nuclear chromatin, nuclear euchromatin, nuclear heterochromatin, nuclear nucleosome		nuclear chromatin, nuclear euchromatin, nuclear heterochromatin, nuclear nucleosome					ADP binding, AMP binding, ATP binding, GTP binding, calcium ion binding, dATP binding, double-stranded DNA binding, nucleosomal DNA binding, nucleotide binding								ADP binding, AMP binding, ATP binding, GTP binding, calcium ion binding, dATP binding, double-stranded DNA binding, nucleosomal DNA binding, nucleotide binding
Cluster of Histidine triad nucleotide-binding protein 1 OS=Rattus norvegicus OX=10116 GN=Hint1 PE=1 SV=5 (HINT1_RAT)	HINT1_RAT [2]		intrinsic apoptotic signaling pathway by p53 class mediator, positive regulation of calcium-mediated signaling, regulation of transcription, DNA-templated		intrinsic apoptotic signaling pathway by p53 class mediator, purine ribonucleotide catabolic process							purine ribonucleotide catabolic process						intrinsic apoptotic signaling pathway by p53 class mediator				cytoplasm					histone deacetylase complex, nucleus			histone deacetylase complex, nucleus		histone deacetylase complex					nucleotide binding	hydrolase activity							hydrolase activity, nucleotide binding
Uncharacterized protein OS=Rattus norvegicus OX=10116 PE=4 SV=1	D4A269_RAT
Histidine triad nucleotide-binding protein 1 OS=Rattus norvegicus OX=10116 GN=Hint1 PE=1 SV=5	HINT1_RAT		intrinsic apoptotic signaling pathway by p53 class mediator, positive regulation of calcium-mediated signaling, regulation of transcription, DNA-templated		intrinsic apoptotic signaling pathway by p53 class mediator, purine ribonucleotide catabolic process							purine ribonucleotide catabolic process						intrinsic apoptotic signaling pathway by p53 class mediator				cytoplasm					histone deacetylase complex, nucleus			histone deacetylase complex, nucleus		histone deacetylase complex					nucleotide binding	hydrolase activity							hydrolase activity, nucleotide binding
Cluster of Alpha-enolase OS=Rattus norvegicus OX=10116 GN=Eno1 PE=1 SV=4 (ENOA_RAT)	ENOA_RAT [3]		ERK1 and ERK2 cascade		ERK1 and ERK2 cascade, canonical glycolysis, cellular response to hypoxia, glycolytic process, protein heterotetramerization							ERK1 and ERK2 cascade, canonical glycolysis, glycolytic process						ERK1 and ERK2 cascade, cellular response to hypoxia				cell cortex region, cytosol, phosphopyruvate hydratase complex						membrane raft, plasma membrane, synaptic membrane					plasma membrane, synaptic membrane				enzyme binding, heat shock protein binding, magnesium ion binding, protein heterodimerization activity, protein homodimerization activity	phosphopyruvate hydratase activity							enzyme binding, heat shock protein binding, magnesium ion binding, phosphopyruvate hydratase activity, protein heterodimerization activity, protein homodimerization activity
Alpha-enolase OS=Rattus norvegicus OX=10116 GN=Eno1 PE=1 SV=4	ENOA_RAT (+1)		ERK1 and ERK2 cascade		ERK1 and ERK2 cascade, canonical glycolysis, cellular response to hypoxia, glycolytic process, protein heterotetramerization							ERK1 and ERK2 cascade, canonical glycolysis, glycolytic process						ERK1 and ERK2 cascade, cellular response to hypoxia				cell cortex region, cytosol, phosphopyruvate hydratase complex						membrane raft, plasma membrane, synaptic membrane					plasma membrane, synaptic membrane				enzyme binding, heat shock protein binding, magnesium ion binding, protein heterodimerization activity, protein homodimerization activity	phosphopyruvate hydratase activity							enzyme binding, heat shock protein binding, magnesium ion binding, phosphopyruvate hydratase activity, protein heterodimerization activity, protein homodimerization activity
Uncharacterized protein OS=Rattus norvegicus OX=10116 PE=4 SV=1	F1M9V3_RAT
Lactoylglutathione lyase OS=Rattus norvegicus OX=10116 GN=Glo1 PE=1 SV=3	LGUL_RAT		negative regulation of apoptotic process, regulation of transcription from RNA polymerase II promoter		glutathione metabolic process, methylglyoxal metabolic process, osteoclast differentiation	osteoclast differentiation			osteoclast differentiation			carbohydrate metabolic process, glutathione metabolic process, methylglyoxal metabolic process		osteoclast differentiation								cytosol					nucleus	plasma membrane		nucleus			plasma membrane				zinc ion binding	lactoylglutathione lyase activity							lactoylglutathione lyase activity, zinc ion binding
RCG61099, isoform CRA_b OS=Rattus norvegicus OX=10116 GN=Srsf3 PE=1 SV=1	A0A0U1RRV7_RAT (+1)
Caveolae-associated protein 1 OS=Rattus norvegicus OX=10116 GN=Cavin1 PE=1 SV=1	G3V8L9_RAT (+1)
Complement C3 OS=Rattus norvegicus OX=10116 GN=C3 PE=1 SV=1	M0RBF1_RAT (+1)
Cathepsin B OS=Rattus norvegicus OX=10116 GN=Ctsb PE=1 SV=2	CATB_RAT (+1)		negative regulation of cell death, regulation of catalytic activity		autophagy, cellular response to mechanical stimulus, proteolysis involved in cellular protein catabolic process	skeletal muscle tissue development						autophagy, proteolysis involved in cellular protein catabolic process	spermatogenesis	skeletal muscle tissue development, spermatogenesis		spermatogenesis	spermatogenesis	cellular response to mechanical stimulus, response to amine, response to cytokine, response to ethanol, response to glucose, response to interleukin-4, response to organic cyclic compound, response to peptide hormone, response to wounding				lysosome, melanosome, mitochondrion				extracellular region, extracellular space	lysosome, melanosome, mitochondrion	apical plasma membrane, external side of plasma membrane, sarcolemma	mitochondrion				apical plasma membrane, external side of plasma membrane, sarcolemma				kininogen binding, macromolecular complex binding, peptide binding, protein self-association	cysteine-type endopeptidase activity							cysteine-type endopeptidase activity, kininogen binding, macromolecular complex binding, peptide binding, protein self-association
Afamin OS=Rattus norvegicus OX=10116 GN=Afm PE=1 SV=1	G3V9R9_RAT
Indolethylamine N-methyltransferase OS=Rattus norvegicus OX=10116 GN=Inmt PE=1 SV=1	D3ZNJ5_RAT
Cluster of Heterogeneous nuclear ribonucleoprotein L OS=Rattus norvegicus OX=10116 GN=Hnrnpl PE=1 SV=1 (F2Z3R2_RAT)	F2Z3R2_RAT [3]
Uncharacterized protein OS=Rattus norvegicus OX=10116 PE=4 SV=2	F1M040_RAT
Heterogeneous nuclear ribonucleoprotein L OS=Rattus norvegicus OX=10116 GN=Hnrnpl PE=1 SV=1	F2Z3R2_RAT (+1)
40S ribosomal protein S21 OS=Rattus norvegicus OX=10116 PE=3 SV=1	D3ZSE0_RAT
Retinoid-inducible serine carboxypeptidase OS=Rattus norvegicus OX=10116 GN=Scpep1 PE=2 SV=1	RISC_RAT		negative regulation of blood pressure, positive regulation of blood vessel diameter, retinoic acid metabolic process		proteolysis involved in cellular protein catabolic process, retinoic acid metabolic process							proteolysis involved in cellular protein catabolic process, retinoic acid metabolic process		negative regulation of blood pressure, positive regulation of blood vessel diameter								cytosol				extracellular region												serine-type carboxypeptidase activity							serine-type carboxypeptidase activity
Enoyl-CoA hydratase, mitochondrial OS=Rattus norvegicus OX=10116 GN=Echs1 PE=1 SV=1	ECHM_RAT				fatty acid beta-oxidation							fatty acid beta-oxidation										mitochondrial matrix, mitochondrion					mitochondrial matrix, mitochondrion		mitochondrial matrix, mitochondrion			mitochondrial matrix						enoyl-CoA hydratase activity, isomerase activity							enoyl-CoA hydratase activity, isomerase activity
Heat shock 27kDa protein 1 OS=Rattus norvegicus OX=10116 GN=Hspb1 PE=1 SV=1	G3V913_RAT (+1)
Cluster of Peptidyl-prolyl cis-trans isomerase A OS=Rattus norvegicus OX=10116 GN=Ppia PE=1 SV=2 (PPIA_RAT)	PPIA_RAT [2]		negative regulation of phosphoprotein phosphatase activity, regulation of viral genome replication		protein peptidyl-prolyl isomerization, protein refolding							protein peptidyl-prolyl isomerization										cytosol				extracellular region	nucleus			nucleus							cyclosporin A binding, unfolded protein binding	peptidyl-prolyl cis-trans isomerase activity							cyclosporin A binding, peptidyl-prolyl cis-trans isomerase activity, unfolded protein binding
Peptidyl-prolyl cis-trans isomerase OS=Rattus norvegicus OX=10116 GN=Ppial4g PE=1 SV=2	M0RCZ9_RAT
Peptidyl-prolyl cis-trans isomerase A OS=Rattus norvegicus OX=10116 GN=Ppia PE=1 SV=2	PPIA_RAT		negative regulation of phosphoprotein phosphatase activity, regulation of viral genome replication		protein peptidyl-prolyl isomerization, protein refolding							protein peptidyl-prolyl isomerization										cytosol				extracellular region	nucleus			nucleus							cyclosporin A binding, unfolded protein binding	peptidyl-prolyl cis-trans isomerase activity							cyclosporin A binding, peptidyl-prolyl cis-trans isomerase activity, unfolded protein binding
Cytochrome b-c1 complex subunit 6, mitochondrial OS=Rattus norvegicus OX=10116 GN=Uqcrh PE=3 SV=1	QCR6_RAT				aerobic respiration, mitochondrial electron transport, ubiquinol to cytochrome c, protein heterooligomerization							aerobic respiration, mitochondrial electron transport, ubiquinol to cytochrome c										mitochondrial respiratory chain complex III					mitochondrial respiratory chain complex III	mitochondrial respiratory chain complex III	mitochondrial respiratory chain complex III		mitochondrial respiratory chain complex III	mitochondrial respiratory chain complex III					macromolecular complex binding	ubiquinol-cytochrome-c reductase activity							macromolecular complex binding, ubiquinol-cytochrome-c reductase activity
Profilin-1 OS=Rattus norvegicus OX=10116 GN=Pfn1 PE=1 SV=2	PROF1_RAT		positive regulation of DNA metabolic process, positive regulation of stress fiber assembly, positive regulation of transcription from RNA polymerase II promoter, positive regulation of viral transcription, regulation of actin filament polymerization		actin polymerization or depolymerization, cellular response to growth factor stimulus, modification of postsynaptic actin cytoskeleton, regulation of actin filament polymerization, synapse maturation	neural tube closure, synapse maturation								neural tube closure, synapse maturation				cellular response to growth factor stimulus, response to organic substance				cytoplasm	cytoskeleton				cytoskeleton, nucleus			nucleus							Rho GTPase binding, actin binding, phosphatidylinositol-4,5-bisphosphate binding, receptor binding								Rho GTPase binding, actin binding, phosphatidylinositol-4,5-bisphosphate binding, receptor binding
Cluster of Desmin OS=Rattus norvegicus OX=10116 GN=Des PE=1 SV=1 (Q6P725_RAT)	Q6P725_RAT [11]		negative regulation of neuron apoptotic process, positive regulation of axonogenesis, positive regulation of glial cell proliferation, regulation of Schwann cell migration, regulation of axon diameter, regulation of axonogenesis		anterograde axonal transport, axonal transport of mitochondrion, cell differentiation, cellular response to fibroblast growth factor stimulus, cellular response to lipopolysaccharide, cellular response to muramyl dipeptide, fat cell differentiation, intermediate filament polymerization or depolymerization, microtubule cytoskeleton organization, neurofilament bundle assembly, neurofilament cytoske…	aging, cell differentiation, cerebral cortex development, decidualization, fat cell differentiation, hippocampus development, nervous system development, neuron projection morphogenesis, peripheral nervous system axon regeneration, positive regulation of axonogenesis, positive regulation of glial cell proliferation, regulation of Schwann cell migration, regulation of axon diameter, regulation of …	anterograde axonal transport, axonal transport of mitochondrion, retrograde axonal transport	skeletal muscle tissue regeneration		anterograde axonal transport, axonal transport of mitochondrion, retrograde axonal transport	locomotion		cellular response to lipopolysaccharide, decidualization	cerebral cortex development, decidualization, hippocampus development, neuromuscular process controlling balance, neuron projection morphogenesis, peripheral nervous system axon regeneration, positive regulation of axonogenesis, positive regulation of glial cell proliferation, regulation of Schwann cell migration, regulation of axon diameter, regulation of axonogenesis, spinal cord development, s…		decidualization	decidualization	cellular response to fibroblast growth factor stimulus, cellular response to lipopolysaccharide, cellular response to muramyl dipeptide, peripheral nervous system axon regeneration, response to acrylamide, response to corticosterone, response to estradiol, response to peptide hormone, response to radiation, response to selenium ion, response to sodium arsenite, response to toxic substance, respon…				axon cytoplasm, cytosol, neurofilament, perinuclear region of cytoplasm	cytoskeleton, neurofilament, type III intermediate filament				cytoskeleton, neurofilament, nuclear matrix, type III intermediate filament			nuclear matrix		neurofilament, nuclear matrix, type III intermediate filament					identical protein binding, kinase binding, phospholipase binding, protein C-terminus binding, protein binding, bridging, protein domain specific binding, protein heterodimerization activity, protein kinase binding, protein phosphatase 2A binding								identical protein binding, kinase binding, phospholipase binding, protein C-terminus binding, protein binding, bridging, protein domain specific binding, protein heterodimerization activity, protein kinase binding, protein phosphatase 2A binding, structural constituent of cytoskeleton
Desmin OS=Rattus norvegicus OX=10116 GN=Des PE=1 SV=1	Q6P725_RAT
Neurofilament light polypeptide OS=Rattus norvegicus OX=10116 GN=Nefl PE=1 SV=3	NFL_RAT		negative regulation of neuron apoptotic process, positive regulation of axonogenesis, regulation of axon diameter		anterograde axonal transport, axonal transport of mitochondrion, intermediate filament polymerization or depolymerization, microtubule cytoskeleton organization, neurofilament bundle assembly, neurofilament cytoskeleton organization, neuron projection morphogenesis, peripheral nervous system axon regeneration, positive regulation of axonogenesis, protein polymerization, regulation of axon diamete…	cerebral cortex development, hippocampus development, neuron projection morphogenesis, peripheral nervous system axon regeneration, positive regulation of axonogenesis, regulation of axon diameter, spinal cord development, synapse maturation	anterograde axonal transport, axonal transport of mitochondrion, retrograde axonal transport			anterograde axonal transport, axonal transport of mitochondrion, retrograde axonal transport	locomotion			cerebral cortex development, hippocampus development, neuromuscular process controlling balance, neuron projection morphogenesis, peripheral nervous system axon regeneration, positive regulation of axonogenesis, regulation of axon diameter, spinal cord development, synapse maturation				peripheral nervous system axon regeneration, response to acrylamide, response to corticosterone, response to organic substance, response to peptide hormone, response to sodium arsenite, response to toxic substance				axon cytoplasm, neurofilament	neurofilament				neurofilament					neurofilament					identical protein binding, phospholipase binding, protein C-terminus binding, protein binding, bridging, protein domain specific binding, protein heterodimerization activity								identical protein binding, phospholipase binding, protein C-terminus binding, protein binding, bridging, protein domain specific binding, protein heterodimerization activity
Neurofilament medium polypeptide OS=Rattus norvegicus OX=10116 GN=Nefm PE=1 SV=3	G3V7S2_RAT (+1)
Peripherin OS=Rattus norvegicus OX=10116 GN=Prph PE=1 SV=1	F1M7P4_RAT (+1)
Alpha-internexin OS=Rattus norvegicus OX=10116 GN=Ina PE=1 SV=2	AINX_RAT				cell differentiation	cell differentiation, nervous system development, tissue regeneration		tissue regeneration						nervous system development				tissue regeneration				neurofilament	neurofilament				neurofilament					neurofilament					protein heterodimerization activity								protein heterodimerization activity
Vimentin OS=Rattus norvegicus OX=10116 GN=Vim PE=1 SV=2	VIME_RAT		positive regulation of glial cell proliferation, regulation of Schwann cell migration, regulation of axonogenesis		cellular response to fibroblast growth factor stimulus, cellular response to lipopolysaccharide, cellular response to muramyl dipeptide, fat cell differentiation, positive regulation of glial cell proliferation, regulation of Schwann cell migration, regulation of axonogenesis	aging, decidualization, fat cell differentiation, positive regulation of glial cell proliferation, regulation of Schwann cell migration, regulation of axonogenesis, skeletal muscle tissue regeneration		skeletal muscle tissue regeneration					cellular response to lipopolysaccharide, decidualization	decidualization, positive regulation of glial cell proliferation, regulation of Schwann cell migration, regulation of axonogenesis		decidualization	decidualization	cellular response to fibroblast growth factor stimulus, cellular response to lipopolysaccharide, cellular response to muramyl dipeptide, response to estradiol, response to radiation, response to selenium ion, response to vitamin D, response to zinc ion, skeletal muscle tissue regeneration				cytoplasm, cytosol, perinuclear region of cytoplasm	intermediate filament, type III intermediate filament				cytoskeleton, intermediate filament, nuclear matrix, type III intermediate filament			nuclear matrix		intermediate filament, nuclear matrix, type III intermediate filament					kinase binding, protein kinase binding, protein phosphatase 2A binding								kinase binding, protein kinase binding, protein phosphatase 2A binding, structural constituent of cytoskeleton
Vimentin OS=Rattus norvegicus OX=10116 GN=Vim PE=1 SV=1	G3V8C3_RAT
Neurofilament heavy polypeptide OS=Rattus norvegicus OX=10116 GN=Nefh PE=1 SV=1	F1LRZ7_RAT (+1)
[truncated: 138 more rows]
[truncated: 4 more columns]
