# Supplementary material for: Proteomics Complementation of the Rat Uterotrophic Assay for Estrogenic Endocrine Disruptors: A Roadmap of Advancing High Resolution Mass Spectrometry-Based Shotgun Survey to Targeted Biomarker Quantifications
Source: Int J Mol Sci. 2021 Feb 8;22(4):1686. doi: 10.3390/ijms22041686 (PMC7914934; doi:10.3390/ijms22041686)
Supplement: Supplementary file 1 [file ijms-22-01686-s001.zip › ijms-1078409_TableS2.xlsx]

## Sheet: Table S2
Table S2. E2-regulated uterine proteins in OVX rats.*
*Meeting the criteria of (1) statistically significant differences (t-test, P<0.05) and at least twofold change in spectral counts between the E2-treated versus untreated control group using label-free quantification by spectral counting and (2) mapped by IPAÒ.
Red background: Upregulation; Green background: Downregulation.
E2-Regulated Protein: Validated/Quantified by Scaffold 4.9 + Mapped by IPA	Accession Number	T-Test (p-value)	Fold Change of SC by Category	Quantitative Profile	Control SC	±SE1	E2-TREATED SC	±SE2
Cluster of serine protease inhibitor A3N OS=Rattus norvegicus OX=10116 GN=LOC299282 PE=1 SV=1 (A0A0G2JXK5_RAT)	A0A0G2JXK5_RAT [3]	0.01	0.04	CONTROL high, TREATED low	10	2	1	1
Apolipoprotein E OS=Rattus norvegicus OX=10116 GN=Apoe PE=1 SV=1	A0A0G2K151_RAT (+1)	0.002	0.05	CONTROL high, TREATED low	19	3	2	1
Microfibril associated protein 4 OS=Rattus norvegicus OX=10116 GN=LOC102553715 PE=1 SV=3	D4A7W8_RAT (+1)	0.00017	0.06	CONTROL high, TREATED low	6	0	1	1
Caveolae-associated protein 3 OS=Rattus norvegicus OX=10116 GN=Cavin3 PE=1 SV=1	CAVN3_RAT	0.0096	0.05	CONTROL high, TREATED low	3	1	1	1
Adenylate kinase isoenzyme 1 OS=Rattus norvegicus OX=10116 GN=Ak1 PE=1 SV=3 Ak1 22 kDa	KAD1_RAT	0.05	0.08	CONTROL high, TREATED low	5	1	1	1
Similar to RIKEN cDNA 1300017J02 OS=Rattus norvegicus OX=10116 GN=RGD1310507 PE=1 SV=1	A0A0G2K896_RAT	0.043	0.08	CONTROL high, TREATED low	5	1	1	1
Dermatopontin OS=Rattus norvegicus OX=10116 GN=Dpt PE=1 SV=1	B2RZ77_RAT	0.02	0.1	CONTROL high, TREATED low	16	4	4	1
Cluster of Serotransferrin OS=Rattus norvegicus OX=10116 GN=Tf PE=1 SV=3 (TRFE_RAT)	TRFE_RAT [2]	0.0049	0.2	CONTROL high, TREATED low	55	9	17	2
Kininogen-1 OS=Rattus norvegicus OX=10116 GN=Kng1 PE=2 SV=1	KNG1_RAT	0.0059	0.2	CONTROL high, TREATED low	8	1	3	1
N(G),N(G)-dimethylarginine dimethylaminohydrolase 2 OS=Rattus norvegicus OX=10116 GN=Ddah2 PE=1 SV=1	DDAH2_RAT	0.0096	0.2	CONTROL high, TREATED low	6	1	2	1
Apolipoprotein A-I OS=Rattus norvegicus OX=10116 GN=Apoa1 PE=1 SV=2	APOA1_RAT	0.025	0.2	CONTROL high, TREATED low	13	3	5	1
Cluster of glutathione S-transferase mu 2 OS=Rattus norvegicus OX=10116 GN=Gstm2 PE=1 SV=2 (GSTM2_RAT)	GSTM2_RAT [5]	0.0031	0.3	CONTROL high, TREATED low	23	3	16	2
Glutathione S-transferase Yb-3 OS=Rattus norvegicus OX=10116 GN=Gstm3 PE=1 SV=2	GSTM4_RAT	0.0024	0.3	CONTROL high, TREATED low	17	3	10	4
Alpha-1-antiproteinase OS=Rattus norvegicus OX=10116 GN=Serpina1 PE=1 SV=1	A0A0G2JY31_RAT (+2)	0.0069	0.3	CONTROL high, TREATED low	16	2	9	2
Methanethiol oxidase OS=Rattus norvegicus OX=10116 GN=Selenbp1 PE=1 SV=2	F1LRJ9_RAT (+1)	0.036	0.3	CONTROL high, TREATED low	16	4	10	2
Alpha-2-HS-glycoprotein OS=Rattus norvegicus OX=10116 GN=Ahsg PE=1 SV=2	FETUA_RAT	0.037	0.3	CONTROL high, TREATED low	26	6	13	0
Cluster of lumican OS=Rattus norvegicus OX=10116 GN=Lum PE=1 SV=1 (LUM_RAT)	LUM_RAT [2]	0.045	0.3	CONTROL high, TREATED low	34	8	20	2
Hemopexin OS=Rattus norvegicus OX=10116 GN=Hpx PE=1 SV=3	HEMO_RAT	0.035	0.4	CONTROL high, TREATED low	41	8	29	1
Cluster of triosephosphate isomerase OS=Rattus norvegicus OX=10116 GN=Tpi1 PE=1 SV=2 (TPIS_RAT)	TPIS_RAT [2]	0.037	0.4	CONTROL high, TREATED low	13	2	13	4
T-kininogen 1 OS=Rattus norvegicus OX=10116 GN=Map1 PE=1 SV=2	KNT1_RAT	0.05	0.4	CONTROL high, TREATED low	28	5	21	5
Malate dehydrogenase, cytoplasmic OS=Rattus norvegicus OX=10116 GN=Mdh1 PE=1 SV=3	MDHC_RAT	0.028	0.5	CONTROL high, TREATED low	7	1	7	3
Glutathione S-transferase P OS=Rattus norvegicus OX=10116 GN=Gstp1 PE=1 SV=2	GSTP1_RAT	0.032	0.5	CONTROL high, TREATED low	18	3	16	1
Heat shock protein HSP 90-alpha OS=Rattus norvegicus OX=10116 GN=Hsp90aa1 PE=1 SV=3	HS90A_RAT	0.034	2	CONTROL low, TREATED high	6	2	25	4
Keratin, type II cytoskeletal 1 OS=Rattus norvegicus OX=10116 GN=Krt1 PE=1 SV=1	A0A0G2JST3_RAT (+1)	0.038	2	CONTROL low, TREATED high	3	1	14	2
Tubulin alpha-4A chain OS=Rattus norvegicus OX=10116 GN=Tuba4a PE=1 SV=1	TBA4A_RAT	0.0031	2.1	CONTROL low, TREATED high	4	0	19	4
Heat shock protein HSP 90-beta OS=Rattus norvegicus OX=10116 GN=Hsp90ab1 PE=1 SV=4	HS90B_RAT	0.013	2.2	CONTROL low, TREATED high	9	2	40	6
Non-muscle caldesmon OS=Rattus norvegicus OX=10116 GN=Cald1 PE=1 SV=1	A0A0G2JTV2_RAT	0.036	2.3	CONTROL low, TREATED high	5	1	24	1
Keratin, type I cytoskeletal 18 OS=Rattus norvegicus OX=10116 GN=Krt18 PE=1 SV=3	K1C18_RAT	0.0033	2.4	CONTROL low, TREATED high	4	1	18	3
Tubulin beta-5 chain OS=Rattus norvegicus OX=10116 GN=Tubb5 PE=1 SV=1	TBB5_RAT	0.0078	2.4	CONTROL low, TREATED high	7	2	35	5
RCG62531, isoform CRA_g OS=Rattus norvegicus OX=10116 GN=Tpm3 PE=1 SV=1	A0A140TAF0_RAT	0.013	2.4	CONTROL low, TREATED high	14	3	35	3
Cluster of 60S ribosomal protein L12 OS=Rattus norvegicus OX=10116 GN=Rpl12 PE=2 SV=1 (RL12_RAT)	RL12_RAT [2]	0.04	2.4	CONTROL low, TREATED high	2	1	11	2
Endoplasmic reticulum chaperone BiP OS=Rattus norvegicus OX=10116 GN=Hspa5 PE=1 SV=1	BIP_RAT	0.0094	2.5	CONTROL low, TREATED high	11	3	53	7
Cluster of Keratin, type II cytoskeletal 8 OS=Rattus norvegicus OX=10116 GN=Krt8 PE=1 SV=3 (K2C8_RAT)	K2C8_RAT [23]	0.026	2.5	CONTROL low, TREATED high	20	7	97	17
Creatine kinase B-type OS=Rattus norvegicus OX=10116 GN=Ckb PE=1 SV=2	KCRB_RAT	0.029	2.5	CONTROL low, TREATED high	18	5	86	6
Heterogeneous nuclear ribonucleoprotein D0 OS=Rattus norvegicus OX=10116 GN=Hnrnpd PE=1 SV=2	HNRPD_RAT	0.046	2.5	CONTROL low, TREATED high	1	0	5	1
Tubulin beta-2A chain OS=Rattus norvegicus OX=10116 GN=Tubb2a PE=1 SV=1	TBB2A_RAT	0.0097	2.6	CONTROL low, TREATED high	6	2	31	6
Tubulin beta-3 chain OS=Rattus norvegicus OX=10116 GN=Tubb3 PE=1 SV=1	TBB3_RAT	0.029	2.7	CONTROL low, TREATED high	6	2	23	2
Cluster of Fibulin-1 OS=Rattus norvegicus OX=10116 GN=Fbln1 PE=1 SV=1 (D3ZQ25_RAT)	D3ZQ25_RAT [2]	0.031	2.9	CONTROL low, TREATED high	3	1	17	4
40S ribosomal protein SA OS=Rattus norvegicus OX=10116 GN=Rpsa PE=1 SV=3	RSSA_RAT	0.043	2.9	CONTROL low, TREATED high	2	0	12	3
Cluster of Transgelin-2 OS=Rattus norvegicus OX=10116 GN=Tagln2 PE=1 SV=1 (TAGL2_RAT)	TAGL2_RAT [2]	0.05	2.9	CONTROL low, TREATED high	5	2	26	5
Isocitrate dehydrogenase [NADP], mitochondrial OS=Rattus norvegicus OX=10116 GN=Idh2 PE=1 SV=2	IDHP_RAT	0.021	3	CONTROL low, TREATED high	1	0	9	2
Cluster of Cofilin-1 OS=Rattus norvegicus OX=10116 GN=Cfl1 PE=1 SV=3 (COF1_RAT)	COF1_RAT [2]	0.043	3	CONTROL low, TREATED high	4	2	21	2
Cluster of Tubulin beta-5 chain OS=Rattus norvegicus OX=10116 GN=Tubb5 PE=1 SV=1 (TBB5_RAT)	TBB5_RAT [7]	0.0015	3.1	CONTROL low, TREATED high	7	2	47	8
Proteasome subunit alpha type OS=Rattus norvegicus OX=10116 GN=Psma5 PE=1 SV=1	Q6P9V6_RAT	0.026	3.1	CONTROL low, TREATED high	1	0	5	1
Transgelin-2 OS=Rattus norvegicus OX=10116 GN=Tagln2 PE=1 SV=1	TAGL2_RAT	0.047	3.1	CONTROL low, TREATED high	4	2	25	5
Cluster of Keratin, type I cytoskeletal 19 OS=Rattus norvegicus OX=10116 GN=Krt19 PE=1 SV=2 (K1C19_RAT)	K1C19_RAT [9]	0.019	3.2	CONTROL low, TREATED high	11	4	66	8
Cluster of Tubulin alpha chain OS=Rattus norvegicus OX=10116 GN=LOC100909441 PE=3 SV=1 (A0A0H2UHM7_RAT)	A0A0H2UHM7_RAT [3]	0.001	3.3	CONTROL low, TREATED high	4	0	31	7
Cluster of Glucose-6-phosphate isomerase OS=Rattus norvegicus OX=10116 GN=Gpi PE=1 SV=1 (G6PI_RAT)	G6PI_RAT [2]	0.0076	3.4	CONTROL low, TREATED high	5	2	32	6
Glucose-6-phosphate isomerase OS=Rattus norvegicus OX=10116 GN=Gpi PE=1 SV=1	G6PI_RAT	0.0076	3.4	CONTROL low, TREATED high	5	2	32	6
Cluster of Nucleoside diphosphate kinase B OS=Rattus norvegicus OX=10116 GN=Nme2 PE=1 SV=1 (NDKB_RAT)	NDKB_RAT [2]	0.0042	3.5	CONTROL low, TREATED high	1	1	10	2
Serine/threonine-protein phosphatase PP1-beta catalytic subunit OS=Rattus norvegicus OX=10116 GN=Ppp1cb PE=1 SV=3	PP1B_RAT	0.0052	3.5	CONTROL low, TREATED high	1	0	6	1
Cluster of Proteasome subunit alpha type OS=Rattus norvegicus OX=10116 GN=Psma5 PE=1 SV=1 (Q6P9V6_RAT)	Q6P9V6_RAT [2]	0.028	3.5	CONTROL low, TREATED high	1	0	5	1
Vinculin OS=Rattus norvegicus OX=10116 GN=Vcl PE=1 SV=1	A0A0G2K8V2_RAT (+2)	0.0017	3.6	CONTROL low, TREATED high	3	1	20	4
Tubulin beta chain OS=Rattus norvegicus OX=10116 GN=Tubb6 PE=1 SV=1	Q4QQV0_RAT	0.0018	3.6	CONTROL low, TREATED high	2	1	17	3
Cluster of Heterogeneous nuclear ribonucleoprotein H OS=Rattus norvegicus OX=10116 GN=Hnrnph1 PE=1 SV=1 (A0A0G2JTG7_RAT)	A0A0G2JTG7_RAT [3]	0.045	3.6	CONTROL low, TREATED high	1	0	9	3
GM2 ganglioside activator OS=Rattus norvegicus OX=10116 GN=Gm2a PE=1 SV=1	Q6IN37_RAT	0.0091	3.7	CONTROL low, TREATED high	1	0	6	1
Cluster of Serine/threonine-protein phosphatase PP1-beta catalytic subunit OS=Rattus norvegicus OX=10116 GN=Ppp1cb PE=1 SV=3 (PP1B_RAT)	PP1B_RAT [3]	0.0076	3.8	CONTROL low, TREATED high	1	0	7	1
Keratin, type II cytoskeletal 8 OS=Rattus norvegicus OX=10116 GN=Krt8 PE=1 SV=3	K2C8_RAT	0.0069	3.9	CONTROL low, TREATED high	7	3	54	8
Cluster of Phosphoglycerate kinase 1 OS=Rattus norvegicus OX=10116 GN=Pgk1 PE=1 SV=2 (PGK1_RAT)	PGK1_RAT [2]	0.013	3.9	CONTROL low, TREATED high	2	1	19	5
Eukaryotic translation initiation factor 5A-1 OS=Rattus norvegicus OX=10116 GN=Eif5a PE=1 SV=3	IF5A1_RAT	0.03	3.9	CONTROL low, TREATED high	1	1	8	1
6-phosphogluconolactonase OS=Rattus norvegicus OX=10116 GN=Pgls PE=1 SV=1	6PGL_RAT (+1)	0.017	4	CONTROL low, TREATED high	1	1	6	1
Tubulin alpha chain OS=Rattus norvegicus OX=10116 GN=LOC100909441 PE=3 SV=1	A0A0H2UHM7_RAT (+1)	0.0039	4.2	CONTROL low, TREATED high	3	1	26	6
L-lactate dehydrogenase A chain OS=Rattus norvegicus OX=10116 GN=Ldha PE=1 SV=1	LDHA_RAT	0.003	4.4	CONTROL low, TREATED high	3	0	25	6
Cluster of L-lactate dehydrogenase A chain OS=Rattus norvegicus OX=10116 GN=Ldha PE=1 SV=1 (LDHA_RAT)	LDHA_RAT [3]	0.0037	4.4	CONTROL low, TREATED high	3	0	26	6
Annexin A1 OS=Rattus norvegicus OX=10116 GN=Anxa1 PE=1 SV=2	ANXA1_RAT	0.0028	4.5	CONTROL low, TREATED high	4	2	38	5
Phosphoglycerate kinase 1 OS=Rattus norvegicus OX=10116 GN=Pgk1 PE=1 SV=2	PGK1_RAT	0.0065	4.5	CONTROL low, TREATED high	2	1	19	5
Similar to 60S acidic ribosomal protein P2 OS=Rattus norvegicus OX=10116 GN=LOC498555 PE=3 SV=1	D4A4D5_RAT (+1)	0.019	4.5	CONTROL low, TREATED high	1	1	12	1
Cluster of Pyruvate kinase PKM OS=Rattus norvegicus OX=10116 GN=Pkm PE=1 SV=3 (KPYM_RAT)	KPYM_RAT [3]	0.0039	4.6	CONTROL low, TREATED high	4	1	40	4
Septin-2 OS=Rattus norvegicus OX=10116 GN=Sept2 PE=1 SV=1	SEPT2_RAT	0.03	4.6	CONTROL low, TREATED high	1	1	11	3
Ribonuclease inhibitor OS=Rattus norvegicus OX=10116 GN=Rnh1 PE=1 SV=1	A0A0G2K9E0_RAT (+1)	0.0026	4.7	CONTROL low, TREATED high	1	1	13	2
Cluster of Aldehyde dehydrogenase, mitochondrial OS=Rattus norvegicus OX=10116 GN=Aldh2 PE=1 SV=1 (ALDH2_RAT)	ALDH2_RAT [6]	0.011	4.7	CONTROL low, TREATED high	3	2	33	8
Adenylyl cyclase-associated protein 1 OS=Rattus norvegicus OX=10116 GN=Cap1 PE=1 SV=3	CAP1_RAT	0.0043	4.8	CONTROL low, TREATED high	2	1	24	5
BWK4 OS=Rattus norvegicus OX=10116 GN=Erp44 PE=1 SV=1	Q5VLR5_RAT	0.028	4.8	CONTROL low, TREATED high	0	0	4	1
ATP synthase subunit alpha, mitochondrial OS=Rattus norvegicus OX=10116 GN=Atp5f1a PE=1 SV=2	ATPA_RAT	0.0047	4.9	CONTROL low, TREATED high	2	1	21	4
Macrophage-capping protein OS=Rattus norvegicus OX=10116 GN=Capg PE=1 SV=1	CAPG_RAT	0.0028	5	CONTROL low, TREATED high	0	0	5	1
Nucleolin OS=Rattus norvegicus OX=10116 GN=Ncl PE=1 SV=3	NUCL_RAT (+1)	0.0052	5.1	CONTROL low, TREATED high	0	0	6	1
Keratin, type I cytoskeletal 15 OS=Rattus norvegicus OX=10116 GN=Krt15 PE=1 SV=1	K1C15_RAT	0.0048	5.4	CONTROL low, TREATED high	1	1	11	0
Proteasome subunit alpha type-5 OS=Rattus norvegicus OX=10116 GN=Psma5 PE=1 SV=1	PSA5_RAT	0.018	5.4	CONTROL low, TREATED high	0	0	5	1
AHNAK nucleoprotein OS=Rattus norvegicus OX=10116 GN=Ahnak PE=1 SV=1	A0A0G2JUA5_RAT	0.015	5.5	CONTROL low, TREATED high	5	4	62	14
Tubulin beta chain OS=Rattus norvegicus OX=10116 GN=Tubb4a PE=1 SV=1	B4F7C2_RAT	0.00077	5.7	CONTROL low, TREATED high	3	1	23	4
Cluster of Programmed cell death 5 OS=Rattus norvegicus OX=10116 GN=Pdcd5 PE=1 SV=1 (D4ADF5_RAT)	D4ADF5_RAT [2]	0.012	5.7	CONTROL low, TREATED high	0	0	5	0
Transcription factor BTF3 OS=Rattus norvegicus OX=10116 GN=Btf3 PE=1 SV=1	Q5U3Y8_RAT	0.0011	5.9	CONTROL low, TREATED high	0	0	2	1
Biglycan OS=Rattus norvegicus OX=10116 GN=Bgn PE=1 SV=1	PGS1_RAT	0.0076	6	CONTROL low, TREATED high	1	0	10	3
Synaptic vesicle membrane protein VAT-1 homolog OS=Rattus norvegicus OX=10116 GN=Vat1 PE=1 SV=1	VAT1_RAT	0.0016	6.2	CONTROL low, TREATED high	0	0	6	1
Dynactin subunit 2 OS=Rattus norvegicus OX=10116 GN=Dctn2 PE=1 SV=1	A0A0G2JUC7_RAT (+1)	0.023	6.2	CONTROL low, TREATED high	0	0	6	2
Chloride intracellular channel protein 1 OS=Rattus norvegicus OX=10116 GN=Clic1 PE=1 SV=1	CLIC1_RAT	0.0042	6.6	CONTROL low, TREATED high	1	0	16	4
Serine (Or cysteine) peptidase inhibitor, clade B, member 6a OS=Rattus norvegicus OX=10116 GN=Serpinb6a PE=1 SV=1	Q6P9U0_RAT	0.024	6.6	CONTROL low, TREATED high	0	0	7	2
Cluster of RNA binding motif protein 3, isoform CRA_a OS=Rattus norvegicus OX=10116 GN=Rbm3 PE=1 SV=1 (G3V6P6_RAT)	G3V6P6_RAT [2]	0.028	6.6	CONTROL low, TREATED high	0	0	3	1
Dipeptidyl peptidase 2 OS=Rattus norvegicus OX=10116 GN=Dpp7	DPP2_RAT	0.0042	6.8	CONTROL low, TREATED high	0	0	4	1
Cluster of Rab GDP dissociation inhibitor beta OS=Rattus norvegicus OX=10116 GN=Gdi2 PE=1 SV=2 (GDIB_RAT)	GDIB_RAT [2]	0.00041	7.2	CONTROL low, TREATED high	2	1	28	4
Prefoldin subunit 2 OS=Rattus norvegicus OX=10116 GN=Pfdn2 PE=2 SV=1	PFD2_RAT	0.004	7.3	CONTROL low, TREATED high	0	0	3	1
Translationally-controlled tumor protein OS=Rattus norvegicus OX=10116 GN=Tpt1 PE=1 SV=1	TCTP_RAT	0.008	7.5	CONTROL low, TREATED high	1	0	12	1
RCG34610, isoform CRA_c OS=Rattus norvegicus OX=10116 GN=Srsf1 PE=1 SV=1	D4A9L2_RAT	0.023	7.5	CONTROL low, TREATED high	0	0	9	3
Actin-related protein 2/3 complex subunit 3 OS=Rattus norvegicus OX=10116 GN=Arpc3 PE=1 SV=1	B2GV73_RAT	< 0.00010	8	CONTROL low, TREATED high	0	0	3	0
F-actin-capping protein subunit beta OS=Rattus norvegicus OX=10116 GN=Capzb PE=1 SV=1	CAPZB_RAT	0.013	8.1	CONTROL low, TREATED high	0	0	3	1
Lambda-crystallin homolog OS=Rattus norvegicus OX=10116 GN=Cryl1 PE=1 SV=3	CRYL1_RAT	0.0073	8.6	CONTROL low, TREATED high	0	0	3	1
Transaldolase OS=Rattus norvegicus OX=10116 GN=Taldo1 PE=1 SV=2	TALDO_RAT	0.0045	8.7	CONTROL low, TREATED high	1	0	13	2
Cluster of Protein disulfide-isomerase A6 OS=Rattus norvegicus OX=10116 GN=Pdia6 PE=1 SV=1 (A0A0G2JSZ5_RAT)	A0A0G2JSZ5_RAT [4]	0.0082	8.7	CONTROL low, TREATED high	1	0	19	5
Granulin, isoform CRA_c OS=Rattus norvegicus OX=10116 GN=Grn PE=4 SV=1	G3V8V1_RAT	0.0015	8.8	CONTROL low, TREATED high	0	0	8	1
Elongation factor 1-alpha 1 OS=Rattus norvegicus OX=10116 GN=Eef1a1 PE=2 SV=1	EF1A1_RAT (+1)	0.0067	8.8	CONTROL low, TREATED high	2	0	33	9
RCG31562, isoform CRA_c OS=Rattus norvegicus OX=10116 GN=Tardbp PE=1 SV=1	I6L9G6_RAT	0.0011	9.2	CONTROL low, TREATED high	0	0	4	1
Elongation factor 1-delta OS=Rattus norvegicus OX=10116 GN=Eef1d PE=1 SV=2	EF1D_RAT	0.001	9.4	CONTROL low, TREATED high	1	0	16	4
Proteasome (Prosome, macropain) activator subunit 1 OS=Rattus norvegicus OX=10116 GN=Psme1 PE=1 SV=1	Q6P9V7_RAT	0.033	9.4	CONTROL low, TREATED high	0	0	4	1
WD repeat-containing protein 1 OS=Rattus norvegicus OX=10116 GN=Wdr1 PE=1 SV=3	WDR1_RAT	0.0085	9.5	CONTROL low, TREATED high	1	0	15	2
Endoplasmin OS=Rattus norvegicus OX=10116 GN=Hsp90b1 PE=1 SV=1	A0A0A0MY09_RAT (+1)	0.0015	9.6	CONTROL low, TREATED high	2	1	35	6
Keratin 78 OS=Rattus norvegicus OX=10116 GN=Krt78 PE=3 SV=1	A0A0G2K4H7_RAT (+2)	0.034	9.6	CONTROL low, TREATED high	0	0	5	2
Cluster of Myosin-11 OS=Rattus norvegicus OX=10116 GN=Myh11 PE=1 SV=2 (E9PTU4_RAT)	E9PTU4_RAT [7]	0.011	9.8	CONTROL low, TREATED high	5	2	105	31
Hsp90 co-chaperone Cdc37 OS=Rattus norvegicus OX=10116 GN=Cdc37 PE=1 SV=2	CDC37_RAT	0.005	9.9	CONTROL low, TREATED high	0	0	3	1
Cluster of Pcbp2 protein OS=Rattus norvegicus OX=10116 GN=Pcbp2 PE=1 SV=1 (Q4V8F6_RAT)	Q4V8F6_RAT [3]	0.0012	10	CONTROL low, TREATED high	0	0	4	1
Alpha-1,4 glucan phosphorylase OS=Rattus norvegicus OX=10116 GN=Pygb PE=1 SV=2	G3V6Y6_RAT	0.00053	11	CONTROL low, TREATED high	0	0	4	1
Collagen type VI alpha 1 chain OS=Rattus norvegicus OX=10116 GN=Col6a1 PE=1 SV=1	D3ZUL3_RAT	0.0019	11	CONTROL low, TREATED high	0	0	4	1
Eukaryotic translation initiation factor 2 subunit 1 OS=Rattus norvegicus OX=10116 GN=Eif2s1 PE=1 SV=2	IF2A_RAT	0.0022	11	CONTROL low, TREATED high	0	0	5	1
T-complex protein 1 subunit gamma OS=Rattus norvegicus OX=10116 GN=Cct3 PE=1 SV=1	TCPG_RAT	0.0034	11	CONTROL low, TREATED high	0	0	4	1
Microtubule-associated protein RP/EB family member 1 OS=Rattus norvegicus OX=10116 GN=Mapre1 PE=1 SV=3	MARE1_RAT	0.0048	11	CONTROL low, TREATED high	0	0	4	1
Cluster of Moesin OS=Rattus norvegicus OX=10116 GN=Msn PE=1 SV=1 (A0A096MK30_RAT)	A0A096MK30_RAT [3]	0.0084	11	CONTROL low, TREATED high	1	0	29	7
Glutamate dehydrogenase 1, mitochondrial OS=Rattus norvegicus OX=10116 GN=Glud1 PE=1 SV=2	DHE3_RAT	0.011	11	CONTROL low, TREATED high	0	0	5	1
Chaperonin subunit 8 (Theta) (Predicted), isoform CRA_a OS=Rattus norvegicus OX=10116 GN=Cct8 PE=1 SV=1	D4ACB8_RAT	0.011	11	CONTROL low, TREATED high	0	0	5	1
60S ribosomal protein L11 OS=Rattus norvegicus OX=10116 GN=Rpl11 PE=1 SV=2	RL11_RAT	0.017	11	CONTROL low, TREATED high	0	0	4	2
SPARC OS=Rattus norvegicus OX=10116 GN=Sparc PE=1 SV=4	SPRC_RAT	0.023	11	CONTROL low, TREATED high	0	0	4	0
Filamin A OS=Rattus norvegicus OX=10116 GN=Flna PE=1 SV=1	C0JPT7_RAT	0.024	11	CONTROL low, TREATED high	1	1	29	9
Alpha-2-macroglobulin OS=Rattus norvegicus OX=10116 GN=A2m PE=2 SV=2	A2MG_RAT	0.0011	12	CONTROL low, TREATED high	0	0	5	1
Tissue-type transglutaminase OS=Rattus norvegicus OX=10116 GN=Tgm2 PE=1 SV=1	Q9WVJ6_RAT	0.0021	12	CONTROL low, TREATED high	2	2	49	6
Cluster of Serine (Or cysteine) proteinase inhibitor, clade H, member 1, isoform CRA_b OS=Rattus norvegicus OX=10116 GN=Serpinh1 PE=1 SV=1 (Q5RJR9_RAT)	Q5RJR9_RAT [3]	0.0022	13	CONTROL low, TREATED high	1	1	28	5
Cluster of Heterogeneous nuclear ribonucleoprotein C, isoform CRA_a OS=Rattus norvegicus OX=10116 GN=Hnrnpc PE=1 SV=1 (A0A0G2JXW4_RAT)	A0A0G2JXW4_RAT [4]	0.0037	13	CONTROL low, TREATED high	0	0	5	0
Splicing factor proline and glutamine rich OS=Rattus norvegicus OX=10116 GN=Sfpq PE=1 SV=1	A0A0G2K8K0_RAT	0.014	13	CONTROL low, TREATED high	0	0	5	2
Heterogeneous nuclear ribonucleoprotein U OS=Rattus norvegicus OX=10116 GN=Hnrnpu PE=1 SV=1	A0A0G2JZ52_RAT (+1)	0.033	13	CONTROL low, TREATED high	0	0	5	2
Proteasome subunit beta type-1 OS=Rattus norvegicus OX=10116 GN=Psmb1 PE=1 SV=3	PSB1_RAT (+1)	0.044	13	CONTROL low, TREATED high	0	0	5	2
60S ribosomal protein L22 OS=Rattus norvegicus OX=10116 GN=LOC100360057 PE=1 SV=1	Q6PDV8_RAT (+1)	0.038	13	CONTROL low, TREATED high	0	0	3	1
Lymphocyte cytosolic protein 1 OS=Rattus norvegicus OX=10116 GN=Lcp1 PE=1 SV=1	A0A0G2K014_RAT (+1)	0.0049	14	CONTROL low, TREATED high	0	0	5	1
Glucose-6-phosphate 1-dehydrogenase OS=Rattus norvegicus OX=10116 GN=G6pdx PE=1 SV=3	G6PD_RAT	0.013	14	CONTROL low, TREATED high	0	0	6	2
ATP-dependent 6-phosphofructokinase, platelet type OS=Rattus norvegicus OX=10116 GN=Pfkp PE=1 SV=2	PFKAP_RAT	0.018	14	CONTROL low, TREATED high	0	0	5	2
ADP-ribosylation factor 4 OS=Rattus norvegicus OX=10116 GN=Arf4 PE=2 SV=2	ARF4_RAT	0.019	14	CONTROL low, TREATED high	0	0	6	2
60S ribosomal protein L30 OS=Rattus norvegicus OX=10116 GN=Rpl30 PE=3 SV=2	RL30_RAT	< 0.00010	14	CONTROL low, TREATED high	0	0	5	1
Alpha-2 antiplasmin OS=Rattus norvegicus OX=10116 GN=Serpinf1 PE=1 SV=1	Q80ZA3_RAT	0.0076	15	CONTROL low, TREATED high	0	0	6	1
Cluster of Nascent polypeptide-associated complex subunit alpha OS=Rattus norvegicus OX=10116 GN=Naca PE=1 SV=1 (M0R9L0_RAT)	M0R9L0_RAT [2]	0.0093	15	CONTROL low, TREATED high	0	0	6	2
Cluster of Proteasome subunit alpha type OS=Rattus norvegicus OX=10116 GN=Psma7 PE=1 SV=1 (A0A0G2K0W9_RAT)	A0A0G2K0W9_RAT [2]	0.017	15	CONTROL low, TREATED high	0	0	5	0
Actin-related protein 3 OS=Rattus norvegicus OX=10116 GN=Actr3 PE=1 SV=1	A0A0G2K1C0_RAT	0.05	15	CONTROL low, TREATED high	0	0	6	2
Proteasome subunit alpha type-3 OS=Rattus norvegicus OX=10116 GN=Psma3 PE=1 SV=3	PSA3_RAT	0.0052	16	CONTROL low, TREATED high	0	0	6	0
UDP-glucose:glycoprotein glucosyltransferase 1 OS=Rattus norvegicus OX=10116 GN=Uggt1 PE=1 SV=2	UGGG1_RAT	0.0098	16	CONTROL low, TREATED high	0	0	6	2
RCG43931 OS=Rattus norvegicus OX=10116 GN=Serpinb9 PE=1 SV=1	Q6AYF8_RAT	0.014	16	CONTROL low, TREATED high	0	0	14	2
Rho GDP dissociation inhibitor beta OS=Rattus norvegicus OX=10116 GN=Arhgdib PE=1 SV=1	Q5M860_RAT	0.003	18	CONTROL low, TREATED high	0	0	7	2
GTP-binding nuclear protein Ran OS=Rattus norvegicus OX=10116 GN=Ran PE=1 SV=3	RAN_RAT	0.023	18	CONTROL low, TREATED high	0	0	7	2
Cluster of Thioredoxin reductase 1, cytoplasmic OS=Rattus norvegicus OX=10116 GN=Txnrd1 PE=3 SV=2 (R9PXU4_RAT)	R9PXU4_RAT [5]	0.0031	20	CONTROL low, TREATED high	0	0	7	1
T-complex protein 1 subunit beta OS=Rattus norvegicus OX=10116 GN=Cct2 PE=1 SV=3	TCPB_RAT	0.03	20	CONTROL low, TREATED high	0	0	8	3
Ribosome-binding protein 1 OS=Rattus norvegicus OX=10116 GN=Rrbp1 PE=1 SV=3	F1M853_RAT	0.041	24	CONTROL low, TREATED high	0	0	10	4
Peroxiredoxin-like 2A OS=Rattus norvegicus OX=10116 GN=Prxl2a PE=1 SV=1	PXL2A_RAT	0.0054	25	CONTROL low, TREATED high	0	0	10	3
60S acidic ribosomal protein P0 OS=Rattus norvegicus OX=10116 GN=Rplp0 PE=1 SV=2	RLA0_RAT	0.0041	26	CONTROL low, TREATED high	0	0	10	2
Eukaryotic initiation factor 4A-II OS=Rattus norvegicus OX=10116 GN=Eif4a2 PE=1 SV=1	A0A0G2K8B7_RAT (+1)	0.0002	28	CONTROL low, TREATED high	0	0	10	2
Heat shock 70 kDa protein 4 OS=Rattus norvegicus OX=10116 GN=Hspa4 PE=1 SV=1	F1LRV4_RAT (+1)	0.0088	29	CONTROL low, TREATED high	0	0	12	3
Cofilin 2 OS=Rattus norvegicus OX=10116 GN=Cfl2 PE=1 SV=1	M0RC65_RAT	0.0012	30	CONTROL low, TREATED high	0	0	11	2
Thymosin beta-4 OS=Rattus norvegicus OX=10116 GN=Tmsb4x PE=1 SV=2	TYB4_RAT	0.011	30	CONTROL low, TREATED high	0	0	12	3
Cluster of Hexokinase-1 OS=Rattus norvegicus OX=10116 GN=Hk1 PE=1 SV=4 (HXK1_RAT)	HXK1_RAT [3]	0.0043	32	CONTROL low, TREATED high	0	0	13	3
Transitional endoplasmic reticulum ATPase OS=Rattus norvegicus OX=10116 GN=Vcp PE=1 SV=3	TERA_RAT	0.0059	33	CONTROL low, TREATED high	0	0	31	7
Leukotriene A(4) hydrolase OS=Rattus norvegicus OX=10116 GN=Lta4h PE=1 SV=1	Q499P2_RAT	0.0013	34	CONTROL low, TREATED high	0	0	12	1
Peptidyl-prolyl cis-trans isomerase B OS=Rattus norvegicus OX=10116 GN=Ppib PE=1 SV=3	PPIB_RAT	0.00028	35	CONTROL low, TREATED high	0	0	13	2
Cluster of Eukaryotic translation initiation factor 4A1 OS=Rattus norvegicus OX=10116 GN=Eif4a1 PE=1 SV=1 (Q6P3V8_RAT)	Q6P3V8_RAT [4]	0.0035	37	CONTROL low, TREATED high	0	0	14	4
Elongation factor 1-gamma OS=Rattus norvegicus OX=10116 GN=Eef1g PE=2 SV=3	EF1G_RAT	0.0036	38	CONTROL low, TREATED high	0	0	15	4
6-phosphogluconate dehydrogenase, decarboxylating OS=Rattus norvegicus OX=10116 GN=Pgd PE=1 SV=1	6PGD_RAT	0.019	43	CONTROL low, TREATED high	0	0	18	5
Ubiquitin-like modifier-activating enzyme 1 OS=Rattus norvegicus OX=10116 GN=Uba1 PE=1 SV=1	UBA1_RAT	0.047	44	CONTROL low, TREATED high	0	0	15	6
Ezrin OS=Rattus norvegicus OX=10116 GN=Ezr PE=1 SV=1	A0A0G2K890_RAT (+1)	0.0081	46	CONTROL low, TREATED high	0	0	19	6
Clathrin heavy chain 1 OS=Rattus norvegicus OX=10116 GN=Cltc PE=1 SV=3	CLH1_RAT (+1)	0.047	48	CONTROL low, TREATED high	0	0	21	8
Keratin, type II cytoskeletal 7 OS=Rattus norvegicus OX=10116 GN=Krt7 PE=3 SV=1	K2C7_RAT	0.0067	57	CONTROL low, TREATED high	0	0	24	5
Elongation factor 2 OS=Rattus norvegicus OX=10116 GN=Eef2 PE=1 SV=4	EF2_RAT	0.014	72	CONTROL low, TREATED high	0	0	30	8
Tubulin beta chain OS=Rattus norvegicus OX=10116 GN=Tubb4b PE=1 SV=2	G3V7C6_RAT	< 0.00010	84	CONTROL low, TREATED high	0	0	32	6
Myosin-11 (Fragments) OS=Rattus norvegicus OX=10116 GN=Myh11 PE=1 SV=3	MYH11_RAT	0.0049	190	CONTROL low, TREATED high	0	0	77	22
